# Supplementary material for: Mining Public Toxicogenomic Data Reveals Insights and Challenges in Delineating Liver Steatosis Adverse Outcome Pathways
Source: Front Genet. 2019 Oct 18;10:1007. doi: 10.3389/fgene.2019.01007 (PMC6813744; doi:10.3389/fgene.2019.01007)
Supplement: Supplementary Table S2 — Details of the modifications made to the iHsa model. [file Table_2.xlsx]

## Sheet: Sheet1
Modification made to the original human genome scale metaboic reconstruction (iHsa)
*Note: For all the exchange metabolite reactions added (with few exception for which there exists a metabolite), a metabolite in the external space is added in the Metabolites sheet of the iHsa model Excel file
Rxn ID/met ID	Reaction/Metname	Old Reaction	New Reaction	Description of change	Reason for change
RCR10294	Pyruvate Kinase	m02696[c] + m01747[c] <==> m01753[c] + m02819[c]	m02696[c] + m01747[c] --> m01753[c] + m02819[c]	Changed to irreversible	PMID:11986306
RCR90212	(S)-2-aminobutanoate uniport [c-s]			transport reaction added	Metabolite detected in plasma
RCR90213	(S)-2-aminobutanoate exchange			exchange reaction added	Metabolite detected in plasma
RCR90214	2-hydroxyglutarate uniport [c-s]			transport reaction added	Metabolite detected in plasma
RCR90215	2-hydroxyglutarate exchange			exchange reaction added	Metabolite detected in plasma
RCR90216	4-hydroxyphenyllactate uniport [c-s]			transport reaction added	Metabolite detected in plasma
RCR90217	4-hydroxyphenyllactate exchange			exchange reaction added	Metabolite detected in plasma
RCR90218	3-ureidopropionate uniport [c-s]			transport reaction added	Metabolite detected in plasma
RCR90219	3-ureidopropionate exchange			exchange reaction added	Metabolite detected in plasma
RCR90220	L-hydroxylysine uniport [c-s]			transport reaction added	Metabolite detected in plasma
RCR90221	L-hydroxylysine exchange			exchange reaction added	Metabolite detected in plasma
RCR90222	argininosuccinate uniport [c-s]			transport reaction added	Metabolite detected in plasma
RCR90223	argininosuccinate exchange			exchange reaction added	Metabolite detected in plasma
RCR90224	L-cystathionine uniport [c-s]			transport reaction added	Metabolite detected in plasma
RCR90225	L-cystathionine exchange			exchange reaction added	Metabolite detected in plasma
RCR90226	dimethylglycine uniport [c-s]			transport reaction added	Metabolite detected in plasma
RCR90227	dimethylglycine exchange			exchange reaction added	Metabolite detected in plasma
RCR90228	dihydrobiopterin uniport [c-s]			transport reaction added (liver most likely produces and exports this metabolite under physiological conditions, PMID: 27711248 )	PMID: 27711248
RCR90229	dihydrobiopterin exchange			exchange reaction added	Metabolite detected in plasma
RCR90230	sn-glycerol-3-phosphate uniport [c-s]			transport reaction added	Metabolite detected in plasma
RCR90231	sn-glycerol-3-phosphate exchange			exchange reaction added	Metabolite detected in plasma
RCR90232	guanidinoacetate uniport [c-s]			transport reaction added (liver uptake, kidney source, PMID: 17928413 )	PMID: 17928413
RCR90233	guanidinoacetate exchange			exchange reaction added	Metabolite detected in plasma
RCR90234	isocitrate uniport [c-s]			transport reaction added	Metabolite detected in plasma
RCR90235	isocitrate exchange			exchange reaction added	Metabolite detected in plasma
RCR90236	L-oleoylcarnitine uniport [c-s]			transport reaction added	Metabolite detected in plasma
RCR90237	L-oleoylcarnitine exchange			exchange reaction added	Metabolite detected in plasma
RCR90238	L-palmitoylcarnitine uniport [c-s]			transport reaction added	Metabolite detected in plasma
RCR90239	L-palmitoylcarnitine exchange			exchange reaction added	Metabolite detected in plasma
RCR90240	1-pyrroline-5-carboxylate uniport [c-s]			transport reaction added	Metabolite detected in plasma
RCR90241	1-pyrroline-5-carboxylate exchange			exchange reaction added	Metabolite detected in plasma
RCR90242	spermidine exchange			exchange reaction added	Metabolite detected in plasma
RCR90243	stearoylcarnitine uniport [c-s]			transport reaction added	Metabolite detected in plasma
RCR90244	stearoylcarnitine exchange			exchange reaction added	Metabolite detected in plasma
RCR90245	3-carboxy-alpha-chromanol uniport [c-s]			transport reaction added	Metabolite detected in plasma
RCR90246	3-carboxy-alpha-chromanol exchange			exchange reaction added	Metabolite detected in plasma
RCR90247	2-aminomuconate semialdehyde uniport [c-s]			transport reaction added	Metabolite detected in plasma
RCR90248	2-aminomuconate semialdehyde exchange			exchange reaction added	Metabolite detected in plasma
RCR90249	cis-aconitate uniport [c-s]			transport reaction added	Metabolite detected in plasma
RCR90250	cis-aconitate exchange			exchange reaction added	Metabolite detected in plasma
RCR90251	L-glutamate:L-cysteine gamma-ligase (ADP-forming) [c]			reaction added to produce gamma-l-glutamyl-L-alpha-aminobutyrate	PMID16608839
RCR90252/m090201[c]	gamma-L-glutamyl-L-cysteine:glycine ligase (ADP-forming) [c]			reaction added to produce ophthalmate	PMID16608839
RCR90253/m090201[s]	ophthalmate uniport [c-s]			transport reaction added	Metabolite detected in plasma
RCR90254	ophthalmate exchange			exchange reaction added	Metabolite detected in plasma
RCR41643	N-acetyl-L-aspartate uniport [c-s]			transport reaction added	Metabolite detected in plasma
RCR30563	N-acetyl-L-aspartate exchange			exchange reaction added	Metabolite detected in plasma
RCR41644	N-acetyl-L-glutamate uniport [m-c]			transport reaction added	PMID:7094915
RCR41645	N-acetyl-L-glutamate uniport [c-s]			transport reaction added	Metabolite detected in plasma
RCR30564	N-acetyl-L-glutamate exchange			exchange reaction added	Metabolite detected in plasma
RCR41646	L-2-aminoadipate uniport [c-s]			transport reaction added	Metabolite detected in plasma
RCR30565	L-2-aminoadipate exchange			exchange reaction added	Metabolite detected in plasma
RCR41647	2-oxoadipate uniport [c-s]			transport reaction added	Metabolite detected in plasma
RCR30567	2-oxoadipate exchange			exchange reaction added	Metabolite detected in plasma
RCR41648	4-hydroxyphenylpyruvate uniport [c-s]			transport reaction added	Metabolite detected in plasma
RCR30568	4-hydroxyphenylpyruvate exchange			exchange reaction added	Metabolite detected in plasma
RCR41649	kynurenine uniport [c-s]			transport reaction added	Metabolite detected in plasma
RCR30569	kynurenine exchange			exchange reaction added	Metabolite detected in plasma
RCR41650	4-hydroxy-2-quinolinecarboxylic acid uniport [c-s]			transport reaction added	Metabolite detected in plasma
RCR30570	4-hydroxy-2-quinolinecarboxylic acid exchange			exchange reaction added	Metabolite detected in plasma
RCR41651	anthranilate uniport [c-s]			transport reaction added	Recon2.2
RCR30571	anthranilate exchange			exchange reaction added	Metabolite detected in plasma
RCR41652	picolinic acid uniport [c-s]			transport reaction added	Metabolite detected in plasma
RCR30572	picolinic acid exchange			exchange reaction added	Metabolite detected in plasma
RCR41653	3-hydroxyisobutyrate uniport [m-c]			transport reaction added	Metabolite detected in plasma
RCR41654	3-hydroxyisobutyrate uniport [c-s]			transport reaction added	Metabolite detected in plasma
RCR30573	3-hydroxyisobutyrate exchange			exchange reaction added	Metabolite detected in plasma
RCR41655	N-acetylmethionine uniport [c-s]			transport reaction added	Metabolite detected in plasma
RCR30574	N-acetylmethionine exchange			exchange reaction added	Metabolite detected in plasma
RCR41656	fumarate uniport [c-s]			transport reaction added	Recon2.2
RCR30575	fumarate exchange			exchange reaction added	Metabolite detected in plasma
RCR41657	malate uniport [c-s]			transport reaction added	Recon2.2
RCR30576	malate exchange			exchange reaction added	Metabolite detected in plasma
RCR30577	lauric acid exchange			exchange reaction added	Metabolite detected in plasma
RCR30578	margaric acid exchange			exchange reaction added	Metabolite detected in plasma
RCR30579	(10Z)-heptadecenoic acid exchange			exchange reaction added	Metabolite detected in plasma
RCR30580	13,16,19-docosatrienoic acid exchange			exchange reaction added	Metabolite detected in plasma
RCR30581	gamma-linolenate exchange			exchange reaction added	Metabolite detected in plasma
RCR30582	adrenic acid exchange			exchange reaction added	Metabolite detected in plasma
RCR30583	(4Z,7Z,10Z,13Z,16Z)-DPA exchange			exchange reaction added	Metabolite detected in plasma
RCR30584	mead acid exchange			exchange reaction added	Metabolite detected in plasma
RCR41658	azelaic acid uniport [c-s]			transport reaction added	Metabolite detected in plasma
RCR30585	azelaic acid exchange			exchange reaction added	Metabolite detected in plasma
RCR41659	O-butanoylcarnitine uniport [c-s]			transport reaction added	Recon2.2
RCR30586	O-butanoylcarnitine exchange			exchange reaction added	Metabolite detected in plasma
RCR41660	O-propanoylcarnitine uniport [c-s]			transport reaction added	Metabolite detected in plasma
RCR30587	O-propanoylcarnitine exchange			exchange reaction added	Metabolite detected in plasma
RCR41661	methylmalonate uniport [c-s]			transport reaction added	Metabolite detected in plasma
RCR30588	methylmalonate exchange			exchange reaction added	Metabolite detected in plasma
RCR30589	sphingosine exchange			exchange reaction added	Metabolite detected in plasma
RCR41662	allantoate uniport [c-s]			transport reaction added	Metabolite detected in plasma
RCR30590	allantoate exchange			exchange reaction added	Metabolite detected in plasma
RCR41663	quinolinate uniport [c-s]			transport reaction added	Metabolite detected in plasma
RCR30591	quinolinate exchange			exchange reaction added	Metabolite detected in plasma
RCR41664	threonate uniport [c-s]			transport reaction added	Metabolite detected in plasma
RCR30592	threonate exchange			exchange reaction added	Metabolite detected in plasma
RCR14695	Heme:oxygen oxidoreductase (alpha-methylene-oxydizing, hydroxylating)	m02050[c] + m01803[c] + 3 m02630[c] --> m01957[c] + m01399[c] + m01595[c] + m01822[c] + m01802[c] + 3 m02040[c]	m02049[c] + 3 m02555[c] + 3 m02630[c] + 5 m02039[c] --> m01399[c] + m01595[c] + m01821[c] + 3 m02554[c] + 3 m02040[c]	Reaction substrates and stiochiometry changed	Recon2.2
RCR40838	bilirubin / HCO3- antiport [cs~cs]	m01396[s] + m02046[c] --> m01396[c] + m02046[s]	m01396[s] + m02046[c] <==> m01396[c] + m02046[s]	changed to reversible (bilirubin uptake from plasma via sinusoidal membrane, release into bile via canalicular membrane)	Recon2.2
RCR40557	bilirubin / GSH / HCO3- antiport [cs~cs]	m01396[s] + m02026[c] + m02046[c] --> m01396[c] + m02026[s] + m02046[s]	m01396[s] + m02026[c] + m02046[c] <==> m01396[c] + m02026[s] + m02046[s]	changed to reversible (bilirubin uptake from plasma via sinusoidal membrane, release into bile bia canalicular membrane)	Recon2.2
RCR41665	2-arachidonoylglycerol uniport [c-s]			transport reaction added	Metabolite detected in plasma
RCR30593	2-arachidonoylglycerol exchange			exchange reaction added	Metabolite detected in plasma
RCR41666	L-xylonate uniport [c-s]			transport reaction added	Metabolite detected in plasma
RCR30594	L-xylonate exchange			exchange reaction added	Metabolite detected in plasma
RCR41667	4-methyl-2-oxopentanoate uniport [c-s]			transport reaction added	Recon2.2
RCR30595	4-methyl-2-oxopentanoate exchange			exchange reaction added	Metabolite detected in plasma
RCR41668	ethanolamine-phosphate uniport [c-s]			transport reaction added	Metabolite detected in plasma
RCR30596	ethanolamine-phosphate exchange			exchange reaction added	Metabolite detected in plasma
RCR41669	SM pool uniport [c-s]			transport reaction added	Metabolite detected in plasma
RCR30597	SM pool exchange			exchange reaction added	Metabolite detected in plasma
RCR41670	trans-4-hydroxy-L-proline uniport [c-s]			transport reaction added	Recon2.2
RCR30598	trans-4-hydroxy-L-proline exchange			exchange reaction added	Metabolite detected in plasma
RCR41671	N6,N6,N6-trimethyl-L-lysine uniport [c-s]			transport reaction added	Metabolite detected in plasma
RCR30599	N6,N6,N6-trimethyl-L-lysine exchange			exchange reaction added	Metabolite detected in plasma
RCR30600	(11Z,14Z)-eicosadienoic acid exchange			exchange reaction added	Metabolite detected in plasma
RCR30601	pentadecylic acid exchange			exchange reaction added	Metabolite detected in plasma
RCR41672	imidazole-4-acetate uniport [c-s]			transport reaction added	Metabolite detected in plasma
RCR30602	imidazole-4-acetate exchange			exchange reaction added	Metabolite detected in plasma
RCR41673	phenylpyruvate uniport [c-s]			transport reaction added	Metabolite detected in plasma
RCR30603	phenylpyruvate exchange			exchange reaction added	Metabolite detected in plasma
RCR41674	2-oxo-3-methylvalerate uniport [c-s]			transport reaction added	Recon2.2
RCR30604	2-oxo-3-methylvalerate exchange			exchange reaction added	Metabolite detected in plasma
RCR41675	3-methyl-2-oxobutyrate uniport [c-s]			transport reaction added	Metabolite detected in plasma
RCR30605	3-methyl-2-oxobutyrate exchange			exchange reaction added	Metabolite detected in plasma
RCR41676	alpha-hydroxyisocaproic acid uniport [c-s]			transport reaction added	Metabolite detected in plasma
RCR30606	alpha-hydroxyisocaproic acid exchange			exchange reaction added	Metabolite detected in plasma
RCR41677	hypotaurine uniport [c-s]			transport reaction added	Metabolite detected in plasma
RCR30607	hypotaurine exchange			exchange reaction added	Metabolite detected in plasma
RCR41678	taurine uniport [c-s]			transport reaction added	Recon2.2
RCR41679	5-oxoproline uniport [c-s]			transport reaction added	Metabolite detected in plasma
RCR30608	5-oxoproline exchange			exchange reaction added	Metabolite detected in plasma
RCR41680	carnosine uniport [c-s]			transport reaction added (source: skeletal muscle, perhaps in liver the uniport could go [s-c])	Metabolite detected in plasma
RCR30609	carnosine exchange			exchange reaction added	Metabolite detected in plasma
RCR41681	3-phospho-D-glycerate uniport [c-s]			transport reaction added	Metabolite detected in plasma
RCR30610	3-phospho-D-glycerate exchange			exchange reaction added	Metabolite detected in plasma
RCR41682	glucuronate transport [c-s]			transport reaction added	based on transport in other species (BiGG Models)
RCR30611	glucuronate exchange			exchange reaction added	Metabolite detected in plasma
RCR41683	O-acetylcarnitine uniport [c-s]			transport reaction added	Metabolite detected in plasma
RCR30612	O-acetylcarnitine exchange			exchange reaction added	Metabolite detected in plasma
RCR41684	L-octanoylcarnitine uniport [c-s]			transport reaction added	Recon2.2
RCR30613	L-octanoylcarnitine exchange			exchange reaction added	Metabolite detected in plasma
RCR41685	phosphocholine uniport [c-s]			transport reaction added	Metabolite detected in plasma
RCR30614	phosphocholine exchange			exchange reaction added	Metabolite detected in plasma
RCR41686	sphinganine uniport [c-s]			transport reaction added	Metabolite detected in plasma
RCR30615	sphinganine exchange			exchange reaction added	Metabolite detected in plasma
RCR41687	xanthosine transport [c-s]			transport reaction added	based on transport in other species (BiGG Models)
RCR30616	xanthosine exchange			exchange reaction added	Metabolite detected in plasma
RCR41688	allantoin transport [c-s]			transport reaction added	based on transport in other species (BiGG Models)
RCR30617	allantoin exchange			exchange reaction added	Metabolite detected in plasma
RCR41689	(S)-dihydroorotate uniport [c-s]			transport reaction added	Metabolite detected in plasma
RCR30618	(S)-dihydroorotate exchange			exchange reaction added	Metabolite detected in plasma
RCR41690	pseudouridine-5-phosphate uniport [c-s]			transport reaction added	Metabolite detected in plasma
RCR30619	pseudouridine-5-phosphate exchange			exchange reaction added	Metabolite detected in plasma
RCR41691	pantothenate transport [c-s]			transport reaction added	based on transport in other species (BiGG Models)
RCR41692	biliverdin uniport [c-s]			exchange reaction added	Metabolite detected in plasma
RCR30620	biliverdin exchange			exchange reaction added	Metabolite detected in plasma
RCR41693	5-methylthioadenosine uniport [c-s]			transport reaction added	Recon2.2
RCR30621	5-methylthioadenosine exchange			exchange reaction added	Metabolite detected in plasma
RCR41694	D-gluconic acid uniport [c-s]			transport reaction added	Metabolite detected in plasma
RCR30622	D-gluconic acid exchange			exchange reaction added	Metabolite detected in plasma
RCR41695	Neu5Ac uniport [c-s]			transport reaction added	Metabolite detected in plasma
RCR30623	Neu5Ac exchange			exchange reaction added	Metabolite detected in plasma
RCR41696	2,5-dihydroxybenzoate uniport [c-s]			transport reaction added	Metabolite detected in plasma
RCR30624	2,5-dihydroxybenzoate exchange			exchange reaction added	Metabolite detected in plasma
RCR41697	gamma-butyrobetaine uniport [c-s]			transport reaction added	Metabolite detected in plasma
RCR30625	gamma-butyrobetaine exchange			exchange reaction added	Metabolite detected in plasma
RCR41698	N-acetylputrescine uniport [c-s]			transport reaction added	Metabolite detected in plasma
RCR30626	N-acetylputrescine exchange			exchange reaction added	Metabolite detected in plasma
RCR30627	eicosanoate exchange			exchange reaction added	Metabolite detected in plasma
RCR30628	cis-erucic acid exchange			exchange reaction added	Metabolite detected in plasma
RCR41699	9,10-hydroxyoctadec-12(Z)-enoate uniport [c-s]			transport reaction added	Metabolite detected in plasma
RCR30629	9,10-hydroxyoctadec-12(Z)-enoate exchange			exchange reaction added	Metabolite detected in plasma
RCR30630	stearidonic acid exchange			exchange reaction added	Metabolite detected in plasma
RCR30631	(13Z,16Z)-docosadienoic acid exchange			exchange reaction added	Metabolite detected in plasma
RCR30633	histamine exchange			exchange reaction added	Metabolite detected in plasma
RCR41700	phenethylamine uniport [c-s]			transport reaction added	Metabolite detected in plasma
RCR30634	phenethylamine exchange			exchange reaction added	Metabolite detected in plasma
RCR41701	phenylacetate uniport [c-s]			transport reaction added	Metabolite detected in plasma
RCR30635	phenylacetate exchange			exchange reaction added	Metabolite detected in plasma
RCR41702	4-coumarate uniport [c-s]			transport reaction added	Metabolite detected in plasma
RCR30636	4-coumarate exchange			exchange reaction added	Metabolite detected in plasma
RCR41703	tyramine uniport [c-s]			transport reaction added	Metabolite detected in plasma
RCR30637	tyramine exchange			exchange reaction added	Metabolite detected in plasma
RCR41704	vanillylmandelate uniport [c-s]			transport reaction added	Metabolite detected in plasma
RCR30638	vanillylmandelate exchange			exchange reaction added	Metabolite detected in plasma
RCR41705	2-hydroxyphenylacetate uniport [c-s]			transport reaction added	Metabolite detected in plasma
RCR30639	2-hydroxyphenylacetate exchange			exchange reaction added	Metabolite detected in plasma
RCR41706	3-hydroxyanthranilate uniport [c-s]			transport reaction added	Metabolite detected in plasma
RCR30640	3-hydroxyanthranilate exchange			exchange reaction added	Metabolite detected in plasma
RCR41707	5-hydroxyindoleacetate uniport [c-s]			transport reaction added	Metabolite detected in plasma
RCR30641	5-hydroxyindoleacetate exchange			exchange reaction added	Metabolite detected in plasma
RCR30642	putrescine exchange			exchange reaction added	Metabolite detected in plasma
RCR41708	4-acetamidobutanoate uniport [c-s]			transport reaction added	Metabolite detected in plasma
RCR30643	4-acetamidobutanoate exchange			exchange reaction added	Metabolite detected in plasma
RCR41709	lactose uniport [g-c]			transport reaction added	Recon2.2
RCR41710	xanthine uniport [c-s]			transport reaction added	Metabolite detected in plasma
RCR30644	xanthine exchange			exchange reaction added	Metabolite detected in plasma
RCR41711	N-carbamoyl-L-aspartate uniport [c-s]			transport reaction added	Recon2.2
RCR30645	N-carbamoyl-L-aspartate exchange			exchange reaction added	Metabolite detected in plasma
RCR41712	5,6-Dihydrouracil uniport [c-s]			transport reaction added	Metabolite detected in plasma
RCR30646	5,6-Dihydrouracil exchange			exchange reaction added	Metabolite detected in plasma
RCR41713	dihydrothymine uniport [c-s]			transport reaction added	Metabolite detected in plasma
RCR30647	dihydrothymine exchange			exchange reaction added	Metabolite detected in plasma
RCR41585	betaine / Na+ symport [s=c]			Changed to reversible	Recon2.2
RCR41619	betaine / chloride / Na+ symport [s=c]			Changed to reversible	Recon2.2
RCR40540	GSH / HCO3- / tauroursodeoxycholate antiport [cs~cs]			Changed to reversible	Recon2.2
RCR40548	glutathionyl-leukotriene C4 / HCO3- / tauroursodeoxycholate antiport [cs~cs]			Changed to reversible	Recon2.2
RCR40549	HCO3- / S-glutathionyl-2-4-dinitrobenzene / tauroursodeoxycholate antiport [cs~cs]			Changed to reversible	Recon2.2
RCR40550	HCO3- / S-glutathionyl-ethacrynic acid / tauroursodeoxycholate antiport [cs~cs]			Changed to reversible	Recon2.2
RCR41545	Ca2+ / Na+ antiport [cs~cs]			Changed to reversible	Recon2.2
RCR14752	RCR14752[c]	m02579[c] --> m02578[c] + m02039[c]	m02579[c] <==> m02578[c] + m02039[c]	reaction changed to reversible	Ammonium synthesis task
RCR21044	(S)-Lactate:ferricytochrome-c 2-oxidoreductase			reaction LB and UB set to zero	Not found in mammalian systems and related to only D/R-Lactate as substrate
