# Supplementary material for: Mining Public Toxicogenomic Data Reveals Insights and Challenges in Delineating Liver Steatosis Adverse Outcome Pathways
Source: Front Genet. 2019 Oct 18;10:1007. doi: 10.3389/fgene.2019.01007 (PMC6813744; doi:10.3389/fgene.2019.01007)
Supplement: Supplementary Table S4 — Log2fold-change matrix with 205 exposure conditions. [file Table_4.xlsx]

## Sheet: fc_final_annot_rvivo
PROBEID	SYMBOL	ENTREZID	GENENAME	amiodarone_15 day_High	amiodarone_15 day_Low	amiodarone_15 day_Middle	amiodarone_29 day_High	amiodarone_29 day_Low	amiodarone_29 day_Middle	amiodarone_4 day_High	amiodarone_4 day_Low	amiodarone_4 day_Middle	amiodarone_8 day_High	amiodarone_8 day_Low	amiodarone_8 day_Middle	amitriptyline_15 day_High	amitriptyline_15 day_Low	amitriptyline_15 day_Middle	amitriptyline_29 day_High	amitriptyline_29 day_Low	amitriptyline_29 day_Middle	amitriptyline_4 day_High	amitriptyline_4 day_Low	amitriptyline_4 day_Middle	amitriptyline_8 day_High	amitriptyline_8 day_Low	amitriptyline_8 day_Middle	bromobenzene_15 day_High	bromobenzene_15 day_Low	bromobenzene_15 day_Middle	bromobenzene_29 day_High	bromobenzene_29 day_Low	bromobenzene_29 day_Middle	bromobenzene_4 day_High	bromobenzene_4 day_Low	bromobenzene_4 day_Middle	bromobenzene_8 day_High	bromobenzene_8 day_Low	bromobenzene_8 day_Middle	carbon tetrachloride_15 day_High	carbon tetrachloride_15 day_Low	carbon tetrachloride_15 day_Middle	carbon tetrachloride_29 day_High	carbon tetrachloride_29 day_Low	carbon tetrachloride_29 day_Middle	carbon tetrachloride_4 day_High	carbon tetrachloride_4 day_Low	carbon tetrachloride_4 day_Middle	carbon tetrachloride_8 day_High
1367462_at	Capns1	29156	calpain, small subunit 1	-0.333497	0.154343	0.148991	-0.385102	0.0396292	-0.00255813	-0.165904	0.0104116	-0.0935747	-0.36031	-0.113534	0.0276729	-0.0622879	-0.111945	-0.195347	0.122597	-0.17903	-0.0965351	-0.341792	-0.31703	-0.192767	-0.46003	-0.00828624	-0.233524	0.229198	0.0943877	-0.0491103	0.0192582	0.0398905	-0.187397	0.0987898	0.0461025	0.185079	-0.0964859	0.0410534	0.0936589	0.136965	-0.164376	-0.00851369	0.381475	0.0692149	0.362694	0.207948	-0.0754451	-0.00457371	0.0109829
1367464_at	Puf60	84401	poly-U binding splicing factor 60	0.0985424	-0.02429	0.0399326	0.0764337	0.0327982	0.096594	0.0839427	0.0333333	-0.0841543	0.0736081	0.0711356	0.032401	-0.0374927	-0.120779	0.0283988	0.0824486	0.0363334	0.0467443	0.106348	0.120234	0.137947	-0.1499	0.0245	-0.0799216	-0.00382443	-0.0498355	-0.0934806	-0.01106	-0.115689	0.0375254	0.0370272	-0.142731	-0.132946	0.0770405	-0.0381695	-0.0406028	0.0510443	-0.0673208	0.0153712	0.0991962	0.00181968	0.0630668	-0.0608604	-0.0412075	0.0255582	0.0120463
1367468_at	Scand1	362252	SCAN domain-containing 1	0.00453841	-0.0500624	-0.00288236	-0.147638	0.0158177	0.0921377	0.0990444	0.106754	0.014742	0.0706094	0.0679091	0.00550831	-0.0194499	0.0282666	0.0892125	-0.0491631	0.0827399	-0.057115	0.119327	-0.0144753	0.132925	-0.0960298	-0.068699	-0.144527	0.104178	0.0843157	0.104506	-0.126089	0.0889812	0.00929328	-0.110227	0.112616	0.117653	-0.0158633	0.10496	-0.0739591	0.0236641	0.0322218	0.0315048	-0.0601727	-0.0682253	-0.102361	-0.117992	-0.095007	-0.12289	0.158431
1367471_at	Polr2e	690966	polymerase (RNA) II (DNA directed) polypeptide E	0.201831	-0.0513824	0.0414828	0.0428257	-0.0780584	-0.042447	0.148493	0.000690562	-0.000115286	0.176376	-0.10137	0.0415673	0.0902065	-0.0388074	0.0192001	0.214736	0.0150077	-0.0250785	0.233658	0.184534	0.190065	0.219608	0.0698907	0.0247083	0.392036	0.0532473	0.146322	0.273579	0.114106	0.122342	0.155024	-0.0294506	0.087901	0.241507	0.101915	0.069962	0.368669	-0.067205	0.212274	0.548625	0.0337545	0.243377	0.176095	0.0137723	0.243822	0.37685
1367477_at	Mrpl53	362388	mitochondrial ribosomal protein L53	0.0013754	0.0207899	0.0352143	-0.089603	0.050741	0.0398861	-0.106223	-0.0167681	-0.0988707	0.0475935	0.00265212	0.0767131	-0.180171	-0.000503005	-0.00803857	0.0577704	-0.0319932	0.132506	-0.00457652	0.0418647	0.0175619	-0.202837	-0.0163216	-0.109687	0.162799	0.0893349	-0.0533314	0.00651936	-0.100412	-0.031896	0.0659847	0.0823188	0.0562837	0.154119	0.0635283	0.125952	0.246889	-0.0684902	0.0520828	0.232798	-0.0704668	0.136608	-0.0122215	-0.047427	-0.055738	0.128692
1367481_at	Vps28	300052	vacuolar protein sorting 28 homolog (S. cerevisiae)	0.398148	-0.00952023	0.0105074	0.208858	-0.031593	0.0194557	0.145345	-0.0882812	-0.0637104	0.207696	0.0117267	0.0628468	-0.145006	0.0254825	0.0635018	-0.000857042	0.0150089	0.0366891	0.208054	0.130982	0.0624804	0.0806323	-0.0304617	-0.0781629	0.0365538	0.0377886	0.0377646	-0.0786148	0.0266825	-0.00209309	-0.0161019	0.113346	0.070651	0.0372366	0.0355726	0.0552629	0.0869113	-0.116433	0.0392481	0.0389015	-0.0108962	-0.0236612	-0.0592936	-0.0299505	0.0733988	0.0545364
1367483_at	Tmem261	298147	transmembrane protein 261	0.00300017	-0.0562333	-0.0633815	0.0252979	0.00937533	0.0327728	0.0505418	-0.000657083	0.0162493	-0.0303491	-0.0167028	-0.00522752	0.00630627	0.104037	-0.0256812	0.0650047	-0.0154766	-0.0248235	0.0802628	0.0168018	0.1413	-0.0403296	0.00819696	0.0359562	0.259478	0.065041	0.088	-0.0131155	0.0658217	-0.0575732	0.0279053	0.0593088	0.0470007	0.0166142	0.0573121	-0.0378093	-0.0613928	-0.0732143	0.0143914	0.167342	0.0207645	0.0371273	-0.0781984	-0.00942817	-0.0715406	0.0509841
1367490_at	Vipas39	681989	VPS33B interacting protein, apical-basolateral polarity regulator, spe-39 homolog	0.211764	0.00618345	-0.178284	0.245592	0.0426956	-0.00717969	0.0449728	0.055435	0.0126053	0.0294015	-0.0394649	-0.0203502	-0.0564603	0.122507	0.0249528	-0.315101	-0.0866291	-0.211218	-0.0251397	-0.0602566	0.0554543	0.190432	-0.0404795	-0.0173649	0.153556	0.118289	0.149177	0.171807	0.0382304	0.0645709	0.0181716	-0.0363963	0.0712622	0.111006	0.053626	0.0269311	0.242153	-0.0199503	0.0475672	0.238204	-0.0898334	0.102618	0.01106	-0.0754069	-0.0330252	0.310685
1367494_at	Fcf1	299198	FCF1 rRNA-processing protein	0.142415	0.0463426	0.0905149	0.0867297	0.00588099	-0.0120878	0.0705739	-0.077181	-0.0173434	0.0387884	-0.0189668	-0.103118	-0.0377382	0.0688526	-0.0701086	-0.0273739	0.00413495	-0.00787141	0.234382	0.106511	0.197341	-0.0852171	-0.0214399	0.0210903	0.265091	0.166242	0.115575	0.0665138	0.0602384	0.0366835	-0.0433042	0.0465797	0.0187455	0.0497179	-0.0444389	0.0237348	-0.116092	-0.0886054	0.0102104	-0.00197162	-0.0232293	-0.0765401	-0.0699105	-0.120622	-0.0347235	-0.102271
1367495_at	Pfdn4	100366237	prefoldin subunit 4	0.170989	0.0172878	0.0330289	0.268317	0.0256052	0.0939513	0.0854712	0.0612929	0.0678779	0.0319796	-0.162327	0.00435324	-0.0633606	0.0457024	-0.0115679	0.067076	0.0652931	-0.018349	0.163322	-0.0797249	0.207252	-0.0731949	-0.0977596	-0.141185	0.181404	-0.100717	0.019544	0.230091	0.00538421	0.11038	0.259311	0.00252115	-0.0028321	0.240532	-0.157595	-0.0428078	0.288906	-0.0344974	0.251485	0.3464	-0.0490048	0.168667	0.126512	-0.0405902	0.21665	0.104119
1367497_at	Ptdss1	314553	phosphatidylserine synthase 1	-0.174715	0.0427303	-0.0248989	-0.32634	0.03347	0.0138687	0.0158441	-0.0398609	0.0069053	-0.143838	0.041248	0.0266551	-0.207151	-0.0278128	-0.0558733	0.194536	0.187258	0.0970574	0.0813024	-0.0260503	0.211786	0.11044	-0.057664	0.0438384	-0.0135212	-0.0368336	-0.0367567	-0.0539106	0.0414567	-0.020013	-0.0915517	-0.0894789	-0.125056	-0.114226	-0.196967	-0.251187	-0.0509638	-0.0974459	0.0130161	0.160195	0.0683379	0.134874	0.213705	0.0782251	0.215194	-0.00308835
1367500_at	Shfm1	680532	split hand/foot malformation (ectrodactyly) type 1	0.221939	0.0965146	0.0285954	0.0627221	-0.0301865	0.0141315	0.0830842	-0.0654177	0.013307	-0.0713327	-0.0513023	0.0516695	-0.0630827	-0.0451385	0.0387722	0.0106291	0.047389	0.00819031	0.0315926	-0.0386552	0.0516485	-0.0510637	-0.0667946	-0.0994196	-0.133916	-0.098919	-0.112414	-0.230903	-0.0262902	-0.094089	-0.0902168	-0.0545281	-0.103831	-0.269893	-0.0727583	-0.198745	0.175401	0.00848423	0.142818	0.0942594	0.00153578	0.129346	-0.038574	-0.0809447	0.0691551	0.162529
1367502_at	Mrpl21	309140	mitochondrial ribosomal protein L21	0.0742825	0.0320194	0.0703755	0.237885	0.130324	0.188299	-0.0807269	-0.260915	-0.0844529	-0.0145972	-0.0658292	0.0958715	-0.0592655	0.0558369	0.0101473	0.22809	0.0262248	0.0855488	0.171654	0.136269	0.235206	-0.168234	-0.017757	-0.101227	0.218716	0.0454523	0.0919292	0.125048	-0.0136278	0.0579431	0.049065	0.00790505	0.0877118	0.160825	0.163671	0.0921258	0.206512	-0.135594	0.171685	0.206158	0.0630271	0.0284179	-0.0447463	0.0420093	0.145999	0.0943549
1367505_at	Zfp644	305127	zinc finger protein 644	0.228033	-0.0183922	-0.05035	0.0693648	0.178581	0.101692	0.115146	0.00913624	0.0505463	-0.113205	0.029708	-0.0450576	-0.230599	0.0419645	0.0814981	-0.157734	0.166487	-0.0538705	0.201287	0.144479	0.246703	0.0584331	0.0448802	0.0303743	-0.0668857	-0.0587702	0.10587	-0.260903	-0.0305174	-0.0624144	-0.231075	-0.0549505	-0.22255	0.0138312	-0.151724	0.0235197	-0.279457	-0.0526483	-0.0824085	-0.312225	-0.185829	-0.251696	0.035108	0.130362	0.1118	-0.103027
1367506_at	mrpl11	293666	mitochondrial ribosomal protein L11	0.102236	-0.0888124	-0.0457856	0.193089	0.0348804	0.0793899	0.0805417	-0.00340267	-0.0127877	0.0818817	-0.168044	-0.061606	-0.229374	-0.0397893	-0.13235	0.0154398	0.00177913	0.0824552	0.155779	0.122545	0.158871	0.0234435	0.10219	-0.0352821	0.110964	0.117868	0.0783575	0.0801589	-0.00202974	-0.00356525	0.0377595	-0.00398489	0.00874924	0.0926377	0.0838159	0.0855642	0.127292	-0.0495127	-0.00575347	-0.0178168	-0.106304	-0.0620245	0.0556458	0.0418638	0.0439882	-0.0594145
1367507_at	Nudt22	293703	nudix (nucleoside diphosphate linked moiety X)-type motif 22	0.0618522	0.18477	0.114685	-0.0383105	0.0253018	0.0196243	0.0552109	0.031857	0.00589519	0.0758436	0.110484	0.0747381	-0.0445574	-0.0668293	0.0673261	-0.0388672	0.0450796	-0.0865749	0.160917	0.0787689	0.142316	-0.160378	-0.0647326	-0.173917	0.139579	-0.000405154	0.0210766	0.0257983	-0.0720582	0.0227791	-0.142744	-0.0851973	-0.0211063	0.237567	-0.00118332	0.102364	-0.161871	-0.223286	-0.135166	-0.140473	-0.148592	-0.136232	-0.214858	-0.153215	-0.144865	-0.280077
1367508_at	RGD1565784	497874	RGD1565784	-0.10592	-0.0630809	-0.107015	-0.0922669	0.0740066	0.00263426	-0.0990766	-0.0874784	-0.0479952	-0.0453566	0.0389799	-0.0292652	0.201682	0.0302607	0.0957345	0.0714112	0.0635749	0.00750063	0.0520561	0.022924	0.150504	0.0252633	-0.00887908	-0.0910522	0.399692	-0.0282309	0.243546	0.235596	0.101646	0.0852556	0.188234	0.032635	0.172574	0.0673929	0.00650129	0.08243	0.0354381	-0.0141411	-0.0761303	0.177006	-0.0400721	-0.0375893	-0.0856223	0.0176021	0.00888506	0.00626622
1367510_at	Txndc15	307180	thioredoxin domain containing 15	-0.0240872	-0.00400781	0.0320577	-0.0450365	0.00641599	0.0587292	0.0425283	-0.0796186	-0.0811739	-0.0050831	0.00942097	0.0393927	-0.0280637	-0.0895096	-0.0451983	0.11267	0.0480309	0.0175968	-0.0348834	0.0353406	0.0965805	0.00581161	0.00102715	-0.0154498	-0.0337479	0.0266509	-0.0263055	-0.229116	-0.106826	-0.0744633	-0.284136	-0.16147	-0.162277	-0.171126	0.0120185	-0.100557	0.0324354	-0.0511001	0.0625661	-0.0541599	0.0528403	0.0410432	0.0368408	0.0467466	0.0556011	0.106269
1367511_at	Ncstn	289231	nicastrin	-0.0566672	-0.0948439	-0.0832216	0.0557345	0.0340976	-0.0169652	0.0637488	0.0342279	-0.063681	0.0493545	0.0487634	0.043225	-0.10028	-0.0412109	0.077954	0.035345	0.0405696	0.0797918	0.0875621	-0.0297024	0.179033	0.159868	0.0378242	0.0644346	-0.19839	0.0706221	-0.0219169	0.00843408	0.0246197	0.0906726	-0.0285165	-0.00635499	0.0120729	0.173042	0.0395471	0.132906	0.00439648	-0.0057824	0.0377553	0.016016	0.00828132	-0.00208307	-0.102016	-0.12491	0.0446343	0.0327384
1367514_at	LOC361635	361635	similar to RIKEN cDNA 9030624J02	0.278506	0.0734583	0.0765239	0.216504	0.131354	0.127201	-0.00546689	0.024953	-0.0370591	0.0824565	-0.0186449	0.0318233	-0.0678311	0.211331	-0.00654228	0.116134	0.000679467	-0.00566065	0.129281	-0.0220567	0.208292	-0.039155	-0.106654	-0.0925833	0.186069	0.287156	0.246329	0.146428	0.145129	0.0896836	0.0397525	0.00962907	0.169407	0.294102	0.116372	0.251588	0.335709	0.10327	0.187357	0.323319	0.0331666	0.191406	-0.010388	-0.040079	0.185845	0.216052
1367515_at	Cnot7	306492	CCR4-NOT transcription complex, subunit 7	0.0631789	-0.0275786	-0.0496837	-0.0562186	0.00236855	-0.0898184	-0.10707	-0.104895	-0.0650015	-0.0825697	0.0969358	0.00469593	-0.278198	0.389401	-0.116308	0.29149	0.437959	0.17072	0.395181	0.00296577	0.392697	0.0376623	0.151618	0.0969145	-0.312497	0.0510171	-0.0349349	0.0257083	-0.0155967	-0.0282742	-0.0844566	-0.0528898	0.0211573	0.165751	-0.17214	-0.0124513	0.2236	-0.0418041	0.0640686	0.162043	-0.00316516	-0.126141	0.0867488	-0.0341907	0.173065	0.0662468
1367516_at	Dtnbp1	641528	dystrobrevin binding protein 1	0.150406	0.117172	0.117196	-0.0760536	0.0384002	0.0857956	0.00240237	-0.0545929	-0.0100122	0.10463	0.091531	-0.0461447	0.0233159	-0.0153789	0.0741928	-0.0216557	0.100462	0.0309484	0.132818	0.114797	0.111851	0.0441763	-0.0218718	-0.0934752	-0.11608	-0.0812695	-0.246048	-0.241838	-0.0675808	-0.122355	-0.0524747	-0.0899774	-0.25534	-0.216049	-0.181626	-0.129327	-0.179481	-0.121034	0.0213157	-0.0893444	-0.0459102	-0.135961	-0.0326064	-0.0522842	0.162361	-0.0259643
1367521_at	Edc3	315708	enhancer of mRNA decapping 3	0.0843317	-0.132786	-0.127147	-0.0115297	-0.16501	-0.153719	-0.229607	-0.316162	-0.364556	0.199053	-0.019057	-0.463653	-0.0389219	-0.0522307	-0.0126164	-0.245296	-0.269523	-0.067957	0.167261	-0.226211	0.391932	0.123003	0.0111484	-0.0228088	-0.17977	-0.0176186	-0.216711	-0.19271	0.166897	0.0986396	-0.0614782	-0.030738	-0.000944123	-0.37747	-0.112261	-0.298722	-0.227628	-0.544941	-0.467348	-0.137068	-0.237866	-0.286929	-0.0946894	-0.0302895	0.108288	-0.121397
1367527_at	LOC686774	686774	similar to Importin-8 (Imp8) (Ran-binding protein 8) (RanBP8)	-0.195762	-0.0782898	-0.144555	-0.186086	0.207152	0.126625	-0.0940152	-0.162869	0.100526	-0.252879	0.0401618	0.0302251	-0.484703	-0.0598842	-0.0185745	0.0265505	0.253248	0.163656	0.144308	0.111174	0.268163	-0.338167	-0.113814	-0.0492115	0.14194	-0.0197525	-0.0272901	-0.0960865	-0.2403	-0.126864	-0.193128	-0.370221	-0.165916	0.102836	0.0275872	-0.102214	0.00146954	-0.04298	-0.0502751	-0.15689	-0.213404	-0.232813	-0.009995	-0.0398552	0.0951657	0.0363414
1367533_at	Elp2	307545	elongator acetyltransferase complex subunit 2	0.091682	-0.00787659	0.023349	0.113094	0.0496276	0.0201084	0.0168486	-0.0470405	-0.0855642	-0.0941233	-0.219219	-0.128862	0.00612629	-0.0496769	0.0125211	0.10973	0.000269548	-0.00798222	0.232752	0.0779499	0.193559	0.0524814	0.0252639	-0.0623582	0.120524	-0.0311707	0.0281528	0.361936	-0.00391382	0.117226	0.27537	-0.0670435	0.137308	0.166164	0.0511436	0.0463675	-0.104846	-0.15341	-0.119509	0.00313902	-0.0719929	-0.19638	-0.172958	-0.104827	-0.113596	-0.4387
1367537_at	Eif4enif1	305468	eukaryotic translation initiation factor 4E nuclear import factor 1	0.251653	-0.0925885	0.0282322	0.188098	0.00835158	0.0185147	0.12618	0.00496398	-0.0446295	0.183887	0.260371	0.151874	-0.202713	0.145526	-0.0380079	-0.189458	0.23095	-0.0328877	0.0671284	-0.0281192	0.0351328	-0.102586	-0.0843477	-0.220998	-0.143207	-0.123459	-0.0755834	0.0272397	0.0920292	0.108395	0.0534082	-0.00212196	0.0620195	0.0441289	-0.0259094	0.0222041	-0.0135089	0.0589707	0.0277583	-0.100811	0.180986	0.0796096	0.151624	0.0708208	0.1906	-0.0727738
1367540_at	Zfyve26	314265	zinc finger, FYVE domain containing 26	0.484095	0.0204052	0.161015	0.417273	-0.0296674	-0.0166336	0.270051	0.0406959	0.0662707	-0.00383637	0.104137	0.159457	-0.30438	0.0791604	-0.0317295	0.00707708	0.179381	0.055664	0.160249	0.209362	0.39063	-0.168397	-0.160587	-0.245518	0.149071	-0.0593148	0.0489701	0.262689	0.189462	0.0630625	0.147425	0.122615	0.0798983	0.233144	0.0360321	0.197801	0.171825	0.0774791	0.218686	0.0619725	0.169607	0.13709	0.112367	-0.0324158	0.316971	-0.111467
1367541_at	Mettl5	502632	methyltransferase like 5	-0.384222	-0.300963	-0.239299	0.028679	-0.00434108	0.0983836	-0.169931	-0.0920433	-0.0878567	-0.0577269	0.119746	0.00030936	-0.350926	-0.0690326	-0.0187247	-0.091256	0.118069	0.0237577	0.112214	-0.120818	0.346761	-0.365338	-0.097404	-0.248996	0.14814	-0.0785352	0.00165467	0.313609	0.0967231	0.259103	-0.0651211	-0.0568362	-0.0809498	0.368981	0.233368	0.0706231	0.0796737	-0.115752	0.184627	0.106708	-0.0467502	-0.0239404	-0.212506	-0.103601	0.0750036	0.101763
1367543_at	Sys1	685079	Sys1 golgi trafficking protein	0.0894784	0.0313593	0.0880427	-0.035279	-0.0382338	0.137255	-0.0698277	-0.0469891	-0.154512	-0.0633049	0.0297334	0.0299591	-0.167484	-0.293153	0.0732656	0.0188554	0.0355502	-0.0185211	-0.00587601	0.0383331	0.0642951	-0.0849755	0.0151828	-0.0892918	0.150856	-0.0510742	-0.150002	0.0874939	0.0474229	0.087072	-0.0374311	-0.0187181	-0.0590839	0.0639794	0.0402997	-0.0988499	0.340081	0.0125869	0.179873	0.386484	0.0640743	0.369444	0.16839	0.0375348	0.029472	0.0737382
1367544_at	Rnf111	300813	ring finger protein 111	-0.0940732	-0.0734784	-0.0578431	0.036666	-0.069716	-0.0306248	0.0972679	0.109569	0.1791	-0.0366432	0.164171	0.086623	-0.415111	0.203366	-0.0290059	-0.142273	0.193094	0.0947959	0.393239	0.0844596	0.40009	0.0630319	0.00686822	-0.0354296	-0.223575	-0.132185	-0.0615705	0.175657	-0.0613485	0.0888365	0.00526268	0.121359	-0.0968806	0.0518364	-0.24051	-0.0965966	-0.144256	-0.0683811	0.12849	-0.234289	0.178782	0.0559793	0.1485	0.181601	0.133837	-0.155558
1367545_at	Rabgap1	311911	RAB GTPase activating protein 1	-0.164339	-0.23986	-0.0281141	-0.0619071	-0.134898	-0.0490238	0.161623	0.0920371	-0.112656	-0.0332801	0.091728	-0.0446561	-0.120339	0.15708	0.0869249	-0.0905191	-0.0108904	-0.00952274	0.139452	0.0205138	0.225018	-0.024797	0.0657623	-0.0403244	0.00840056	-0.117547	-0.2402	-0.173992	-0.15312	-0.155124	-0.0961219	0.0355959	0.19612	-0.153295	0.000337681	-0.0301427	-0.266107	-0.213854	-0.224152	-0.192473	0.0334964	-0.0580922	0.114063	0.133829	0.23953	-0.0112054
1367546_at	Mrpl43	309440	mitochondrial ribosomal protein L43	0.232743	-0.0680167	0.00552346	0.157788	0.0708032	0.0966941	-0.0778436	-0.115877	-0.183386	0.0233355	-0.283069	-0.138792	-0.219777	-0.141409	-0.151091	0.0620236	-0.0285703	0.0449842	-0.0341537	-0.0677797	0.00635866	-0.0729781	-0.0589847	-0.00911077	-0.138347	-0.365356	-0.19515	-0.0318344	-0.0381843	0.154281	0.119278	-0.18449	0.0736736	0.291348	-0.0831496	0.137509	0.193515	0.127521	0.241994	0.120835	-0.0866652	0.0556692	0.0584917	-0.0426099	-0.0731045	0.130077
1367550_a_at	Tm2d1	362545	TM2 domain containing 1	0.0421605	-0.038836	-0.147963	0.076903	-0.112158	-0.0484234	-0.188957	-0.104412	-0.172398	0.0971984	0.108366	0.177888	-0.20515	-0.118086	-0.159003	0.0922053	0.0994999	0.0795743	0.192374	0.108749	0.369272	-0.211271	-0.0444785	-0.0210678	0.0320985	-0.0557779	-0.118517	0.0349464	-0.0138222	-0.0601006	-0.059649	0.0198001	-0.0558256	0.185386	-0.0548137	-0.0165042	0.176714	0.0424	0.0125887	0.400829	0.0138114	0.218267	0.156823	0.0452117	0.143569	0.101688
1367553_x_at	Hbb	24440	hemoglobin, beta	-1.49869	0.0184259	-0.193719	0.305705	-0.0330172	0.0707884	-0.301107	-0.0677821	-0.0514595	-1.47843	0.0614906	-0.00401378	-0.27486	-0.16566	0.436029	-0.397803	0.111364	-0.281014	-0.600251	-0.139844	-0.359187	-0.592845	0.0758219	-0.345508	0.477027	0.232055	0.222631	-0.299823	0.0971014	0.139786	-0.69715	-0.421662	-0.321167	0.0552995	-0.0670794	-0.0594329	-0.237639	0.0253284	-0.0526567	-0.415428	0.257855	-0.217565	-0.0494639	-0.156576	-0.146596	-0.0924925
1367562_at	Sparc	24791	secreted protein, acidic, cysteine-rich (osteonectin)	-0.915153	-0.29617	-0.414991	-0.0626211	-0.293028	0.197549	-0.12944	0.0914133	-0.302028	0.123897	0.252827	0.263959	-0.276149	-0.0840962	0.00295824	-0.114707	-0.458274	-0.211222	-0.151131	-0.00191774	0.00452783	-0.262957	-0.117018	-0.018626	-0.238619	-0.0292267	-0.418397	0.0423048	-0.214794	-0.0137819	-0.433145	-0.586615	-0.187181	0.102447	0.183617	-0.0464224	0.475954	0.0565429	0.37386	0.614287	0.208808	0.740602	-0.325872	-0.341398	-0.306845	0.180726
1367568_a_at	Mgp	25333	matrix Gla protein	-0.153336	0.0738262	-0.184119	-0.371528	-0.218246	0.0413031	-0.0809537	-0.192845	-0.450701	-0.0704367	0.0150758	-0.00237824	0.0257047	0.304055	-0.0287747	-0.263887	-0.0859227	-0.194009	0.301464	0.17107	0.190939	-0.10509	-0.463854	-0.247692	0.326109	-0.259612	-0.136988	-0.0128238	0.13095	-0.110601	0.245776	0.173064	-0.254453	-0.239301	-0.135664	-0.18821	0.735586	0.0250248	0.461868	0.780806	0.158076	0.663662	0.00319522	-0.180836	-0.0697899	0.326676
1367570_at	Tagln	25123	transgelin	0.0898169	0.283053	0.123619	-0.261597	-0.00564828	0.240043	-0.315904	-0.146465	0.0222425	-0.0900124	0.238022	0.0487715	-0.0081593	0.0731489	0.144167	-0.236165	-0.249221	-0.145373	-0.1177	-0.333835	-0.206647	-0.335722	-0.131403	-0.153173	0.0251267	-0.0618951	0.0930803	-0.109785	-0.012917	0.00791548	0.587832	0.135965	0.224063	-0.295226	0.0485515	0.124101	0.940972	0.000576621	1.04256	0.962244	-0.0112164	0.648139	0.497605	-0.191846	0.457093	0.293602
1367571_a_at	Igf2	24483	insulin-like growth factor 2	-0.302483	-0.0763575	-0.245058	-0.147781	-0.0596205	-0.270161	-0.00500512	0.158416	-0.0147971	-0.264889	-0.0765363	-0.0871023	0.116342	-0.0412175	0.183057	-0.204974	0.0556687	-0.129036	0.0500609	0.280474	-0.0332639	0.207889	0.0245502	0.276976	-0.0625578	-0.0513295	0.0526696	-0.123778	0.0671764	0.0143652	-0.178238	0.125618	-0.0435697	-0.168087	-0.0753242	-0.103878	-0.20963	-0.0976184	-0.401402	-0.472674	-0.163999	-0.41961	-0.0804198	0.185435	-0.238066	-0.342047
1367574_at	Vim	81818	vimentin	-0.415989	0.0641908	-0.136613	-0.140129	-0.306054	0.0616035	-0.0690888	0.149449	-0.106152	-0.465369	0.0942045	0.0480507	-0.171471	0.208153	0.0140758	-0.169668	-0.00530934	-0.0692513	-0.311125	-0.0881446	-0.0768845	-0.449691	-0.158552	0.052564	0.156276	0.139572	0.0690915	-0.178555	-0.104079	0.107534	0.669231	0.112253	0.0536597	-0.0896172	-0.0286643	-0.159962	0.885256	0.18718	1.04484	0.857707	0.278801	0.792236	0.574141	-0.24089	0.830036	0.589305
1367577_at	Hspb1	24471	heat shock protein B1	0.775068	0.197972	0.753865	0.49584	-0.0299262	0.60449	0.60567	-0.198682	0.0246867	0.316452	0.273989	0.114624	-0.363521	-0.493776	-0.287251	0.529384	-0.255516	0.0301691	0.255211	0.173958	0.498757	0.572767	-0.122537	-0.0621857	0.373362	-0.165765	0.402427	0.166158	-0.0195764	0.255875	0.99165	0.605969	-0.207476	0.874316	-0.18399	-0.0903466	2.25743	-0.280829	1.54366	2.17165	0.323059	1.33393	1.24624	0.162815	0.607477	1.35739
1367581_a_at	Spp1	25353	secreted phosphoprotein 1	-0.333375	-0.0760978	-0.0862285	-0.264286	-0.0541144	-0.207808	-0.337079	-0.375238	-0.128237	-0.0529732	0.0500806	0.00382257	0.00805008	-0.0109789	-0.0427493	-0.404538	-0.223404	-0.610444	0.0748099	0.464034	0.248825	0.145517	0.23514	0.330811	-0.103509	-0.229266	0.859571	-0.159156	-0.0530558	-0.415341	0.0430547	0.378645	-0.190224	-0.230238	-0.161463	-0.154947	1.93292	0.598786	1.87724	2.23866	0.366695	1.52019	0.94082	-0.452431	1.2067	1.15146
1367584_at	Anxa2	56611	annexin A2	-0.703085	0.185541	-0.0787223	-0.360271	-0.0524618	0.0610708	-0.214855	0.07463	-0.0386241	-0.394832	0.182448	0.0206641	-0.0999217	0.196696	0.019978	-0.0609155	-0.134162	-0.0679735	-0.579081	-0.258705	-0.333864	-0.697922	-0.12827	-0.0850617	0.391743	0.115889	0.328441	0.0687044	-0.0667213	0.165798	1.34055	0.202795	0.274832	0.379658	0.0671454	0.0682584	2.22936	0.233177	1.78154	2.63118	0.371607	1.61865	0.642474	-0.303767	0.631961	1.09878
1367590_at	Ran	84509	RAN, member RAS oncogene family	0.115135	0.192267	0.190921	0.390651	0.113351	0.268302	0.066183	0.0531662	0.183075	0.0812013	-0.0561222	0.0271544	-0.0498821	-0.0502198	-0.0717282	0.408365	0.262469	0.251781	-0.0889939	0.118437	0.0951311	-0.160903	0.0112594	-0.0427483	0.233371	-0.0359256	0.0341977	0.279464	-0.0557107	0.169298	0.402163	0.0254502	-0.020012	0.464925	0.0378588	0.0915682	0.595622	-0.0060407	0.498474	0.698332	0.0845715	0.293852	0.19124	-0.0331093	0.196095	0.194684
1367593_at	Sepw1	25545	selenoprotein W, 1	0.0166619	-0.0890431	-0.076918	-0.281748	-0.00109411	0.0652869	0.0185913	0.0112005	0.139924	0.0302809	0.017764	0.149417	0.0544948	-0.226219	0.493337	-0.250481	-0.102976	-0.106398	-0.0732562	0.20806	-0.0535375	-0.046343	-0.000244328	0.0371501	0.062811	-0.159178	-0.0678402	-0.069173	0.10899	-0.0846917	0.488915	0.168324	0.361505	0.284109	0.135903	-0.0192288	0.595948	0.131742	0.386814	0.155793	-0.209989	0.0519613	0.272326	0.231024	0.207808	0.461939
1367594_at	Bgn	25181	biglycan	-0.209107	0.194411	0.140914	-0.252412	-0.112852	-0.0330474	0.00656065	0.162596	0.132455	-0.0822336	0.170277	0.211803	-0.141908	0.0744897	-0.0298292	-0.175602	-0.274717	-0.126822	-0.275061	-0.000901027	-0.133323	-0.20857	-0.0796902	0.00820891	0.0560479	-0.0155967	-0.0428374	-0.24212	0.0606757	-0.154375	-0.106605	-0.123491	-0.426221	-0.145805	0.0438599	-0.047622	0.367827	0.104576	0.248264	0.696226	0.249037	0.760041	-0.224228	-0.211348	-0.303058	0.298095
1367601_at	Cited2	114490	Cbp/p300-interacting transactivator, with Glu/Asp-rich carboxy-terminal domain, 2	-0.450903	0.211648	0.103973	-0.668915	-0.254732	-0.410949	-0.299069	0.0345531	0.00504266	-0.36519	-0.374072	-0.173085	-0.404068	0.118171	0.100724	-0.188491	0.00259149	-0.0235851	0.347185	0.0359991	0.539811	-0.0729977	-0.135731	-0.0810023	-0.0545624	-0.014805	-0.204226	0.0764648	0.189571	-0.0883716	-0.988681	-0.627688	-0.755629	-0.49084	0.0177137	-0.00232193	-0.828275	-0.0967515	-0.952835	-0.897342	-0.418083	-0.653168	-0.775286	-0.63388	-0.593955	-0.543787
1367605_at	Pfn1	64303	profilin 1	0.0713045	0.0893725	0.0975714	0.0422084	-0.0489911	0.0335083	0.096863	0.0907768	0.051822	-0.0244392	-0.124347	-0.0267782	-0.0191671	-0.251862	0.10703	0.0739483	0.0341022	0.0723546	-0.114761	-0.0630819	-0.135743	-0.0965761	0.0125323	-0.0093386	0.0595156	0.0551528	0.113676	0.0262165	-0.0318302	0.0591917	0.287938	0.17312	0.0901005	0.212895	-0.0731866	0.0765561	0.125311	-0.128156	0.190643	0.163986	0.0124877	0.127517	0.0732807	-0.11564	0.16284	0.147138
1367609_at	Mif	81683	macrophage migration inhibitory factor (glycosylation-inhibiting factor)	0.0587381	0.130047	0.28082	-0.263602	-0.00208831	-0.0427837	-0.105397	0.114013	-0.0481972	-0.080636	-0.0940228	0.151334	-0.24298	-0.339276	-0.359891	0.110405	-0.197899	-0.369253	-0.0188615	0.129477	0.28076	-0.0652531	-0.168297	-0.0920469	0.480411	0.0741334	0.443103	0.447333	0.000431751	0.330519	0.334609	0.206132	0.280062	0.516257	0.3074	0.254299	-0.253127	-0.350607	-0.189816	-0.292471	-0.342554	-0.0515951	0.0699663	0.322898	-0.0398817	-0.0605059
1367614_at	Anxa1	25380	annexin A1	-0.476438	0.284488	-0.0729671	-0.254387	-0.369025	0.00472182	-0.184606	0.254788	-0.152268	-0.250537	-0.027021	-0.197004	-0.130834	0.484691	0.0232678	-0.0636741	-0.0234456	-0.143155	-0.00548167	0.079938	0.0464602	-0.223797	-0.0827505	0.0248675	0.284379	0.0593531	0.103943	-0.156374	-0.187127	-0.00270291	0.275244	0.0384418	-0.300283	-0.115936	-0.0752452	0.00356479	0.564947	-0.168107	0.800375	0.872676	0.0787703	0.560621	0.276639	-0.189215	0.202518	0.0461967
1367617_at	Aldoa	24189	aldolase A, fructose-bisphosphate	0.37229	0.0297965	0.077877	0.668455	-0.00544769	0.196367	0.0732719	0.0268736	0.0481681	-0.0593723	-0.0869781	-0.084705	0.377842	-0.237411	0.119447	0.210109	-0.0255144	0.043451	-0.159192	-0.0942164	-0.191048	-0.0997407	-0.00158346	-0.124484	0.215805	-0.0344282	-0.0362454	0.299728	0.023651	0.0768012	0.565444	0.122481	0.280217	0.245191	0.0186279	0.0218501	0.719218	0.103999	0.476168	0.747843	0.112089	0.512209	0.484766	-0.146156	0.718145	0.444022
1367624_at	Atf4	79255	activating transcription factor 4	0.254767	-0.202411	0.131494	0.242352	0.0986082	0.105515	0.172121	-0.032438	0.0819292	0.207178	0.184397	0.0814136	0.146886	-0.198224	-0.124143	0.298287	0.334296	0.10917	0.0947347	-0.127557	-0.30664	0.329271	-0.185483	-0.134653	-0.215858	-0.582276	-0.240744	0.159926	0.0317143	0.0575592	0.0577146	0.378278	0.35878	0.20721	0.189218	0.197187	0.154737	0.148026	0.270682	-0.0573445	0.261158	0.174088	0.284326	0.136951	0.0352561	-0.0959067
1367627_at	Gatm	81660	glycine amidinotransferase (L-arginine:glycine amidinotransferase)	-0.19958	-0.29317	-0.282151	-0.0400208	-0.158081	0.0823857	0.040541	0.269142	0.129458	-0.0648579	0.331683	0.369618	-0.589791	0.370266	-0.0496546	-0.193971	-0.0283382	-0.189145	0.0401554	-0.258251	0.0947621	-0.27337	0.025506	0.122044	-0.406782	-0.034413	-0.180473	-0.113917	-0.00404871	-0.255837	0.183903	-0.186786	-0.0693028	0.140107	0.171595	0.061245	-0.0630149	0.0410672	0.177616	-0.0366476	-0.262843	-0.059659	0.10706	-0.236917	0.295818	0.250761
1367628_at	Lgals1	56646	lectin, galactoside-binding, soluble, 1	-0.698913	0.213318	-0.110334	-0.881695	-0.379979	-0.143761	-0.568413	-0.0102114	-0.198946	-0.472268	0.191257	-0.0565091	-0.128828	0.00878431	0.0305508	-0.170389	-0.351724	-0.159688	-0.184282	-0.0360243	-0.170115	-0.937016	-0.436712	-0.275129	0.01145	-0.0769265	0.181952	0.163367	0.0435515	0.311835	0.851714	0.217118	0.120907	-0.175296	0.133372	0.0519203	1.28868	0.204915	1.22318	0.650485	-0.0570163	0.67382	0.107179	-0.181219	0.084376	0.449309
1367631_at	Ctgf	64032	connective tissue growth factor	0.122812	-0.239973	-0.402484	0.204229	-0.516727	0.282975	-0.20185	-0.421684	-0.385769	0.0981767	-0.329581	-0.614715	0.430377	0.775182	0.270962	-0.282843	0.0130822	-0.858114	0.0133506	-0.931595	-0.042937	0.959896	0.787472	0.358516	0.533527	-0.259705	-0.496876	-0.289664	0.23546	-0.368013	-0.301371	-0.0548056	-0.52017	-0.659397	-0.0715427	0.0750694	-0.0313218	-0.417661	-0.067021	0.691551	-0.115806	0.432626	0.569962	0.00152808	0.586947	-0.0304467
1367633_at	Glul	24957	glutamate-ammonia ligase	0.616359	0.488352	0.467703	0.738001	-0.142038	0.0571541	0.237837	0.0248048	0.0881671	-0.312175	-0.131078	-0.156135	-0.406557	-0.111177	-0.0104617	-0.246691	-0.267449	-0.445422	-0.641378	0.170014	-0.00113346	-0.86236	-0.280942	-0.357925	-0.149646	0.0789599	0.0592803	-0.171423	-0.0060433	-0.0504535	0.137627	-0.152795	0.0116473	-0.179828	-0.0464629	-0.216079	0.0395029	-0.31695	-0.0440194	0.156708	-0.31032	0.311152	-0.782725	-0.39606	-0.570169	-0.0656958
1367648_at	Igfbp2	25662	insulin-like growth factor binding protein 2	2.71743	-0.398579	-0.228358	2.5248	-0.111984	-0.0218486	0.995325	0.630904	-0.0102796	0.859724	-0.0255575	-0.16085	0.566249	-0.282475	0.116727	0.888097	-0.083683	0.257874	-0.0708032	0.11862	0.573992	-0.0197636	-0.198751	-0.069863	-0.20066	-0.141159	-0.243804	0.0894176	0.200015	0.0671402	0.138926	0.0236134	-0.119812	-0.328261	0.0262834	-0.271067	0.911979	0.137228	0.330893	1.37997	-0.0378421	0.752933	0.158901	-0.101436	0.0337131	0.720426
1367650_at	Tinagl1	94174	tubulointerstitial nephritis antigen-like 1	0.299981	0.106782	0.0626708	0.0662588	-0.081426	0.0292069	0.125343	0.0916726	-0.0664141	0.074284	-0.0784234	-0.143907	-0.166041	-0.0170284	-0.0941468	0.0761152	-0.0301701	0.0563372	0.0495569	-0.128387	-0.192571	-0.143391	-0.0900204	-0.240017	0.107354	0.0689355	-0.117488	-0.11505	0.00713594	-0.188494	-0.233975	-0.0563575	0.101557	-0.204827	-0.115561	-0.0562717	-0.302631	-0.0547675	-0.170109	-0.266175	-0.19485	-0.317927	-0.0725507	-0.179219	0.0753913	-0.000657825
1367652_at	Igfbp3	24484	insulin-like growth factor binding protein 3	0.355533	0.0859683	0.259961	0.456597	0.0100224	0.0799562	0.569508	0.153747	0.364485	0.236482	0.318615	0.0550419	-0.289919	0.29295	-0.0840392	-0.663312	-0.381544	-0.5207	-0.0624091	-0.0260602	0.184905	-0.134899	-0.369354	-0.14788	0.302458	0.195848	-0.0179414	-0.179418	0.138109	-0.0220006	-0.0174483	0.0103642	-0.373421	-0.344783	0.11456	-0.386138	-0.064966	-0.199819	0.0880313	0.0928338	-0.0705839	0.25195	-0.552846	-0.233548	-0.357626	0.284965
1367654_at	Fat1	83720	FAT atypical cadherin 1	0.322702	0.173242	0.119687	0.0159505	0.0628505	0.250452	0.0138438	-0.133808	0.0153517	0.337707	0.1059	-0.104231	0.216774	0.0718505	0.074239	0.423258	0.0629375	-0.0469114	0.336006	-0.0200706	0.154002	0.0776644	-0.101708	0.0220321	-0.310512	-0.154238	-0.0933674	0.109251	0.0402905	0.0174895	0.632776	0.256717	0.202153	0.0667893	-0.0916423	-0.284068	1.24781	0.131949	1.06718	1.07855	0.0629044	0.643964	0.257821	-0.0892836	-0.0153564	0.451175
1367658_at	Shank3	59312	SH3 and multiple ankyrin repeat domains 3	0.176709	-0.216891	-0.0667577	0.165556	-0.117328	0.0363313	0.0111246	-0.175859	0.0239176	0.159204	0.231068	0.175219	-0.0424766	-0.21868	-0.0933222	0.117686	-0.176177	-0.0653965	-0.271135	-0.116825	-0.195211	0.257106	0.00891623	0.1237	0.0267228	0.284176	0.112141	-0.0885221	-0.23785	-0.0803968	0.310928	0.108689	-0.0165627	0.31748	0.121998	-0.0193524	0.135135	-0.131135	0.0875053	-0.0143087	-0.0794905	0.223199	0.0426085	-0.0799167	-0.0271066	0.414252
1367659_s_at	Eci1	29740	enoyl-CoA delta isomerase 1	2.15001	-0.0100605	0.574598	2.1355	0.0440676	0.469025	1.50332	0.341474	0.292523	1.88574	-0.0768198	0.425329	0.327572	-0.145365	-0.497209	0.546143	-0.233505	-0.29147	-0.297726	0.151095	0.148811	0.681519	0.226709	-0.116856	0.782903	0.124963	0.350612	0.326805	-0.0207669	0.345672	0.745346	0.353946	0.538213	0.735963	0.377453	0.505845	0.800934	0.234112	0.213184	0.763137	0.122445	0.547826	0.0265173	-0.220144	0.156259	0.416133
1367660_at	Fabp3	79131	fatty acid binding protein 3, muscle and heart	0.0510797	0.0585829	-0.0497086	0.511072	0.167901	0.261057	-0.0107642	-0.0257083	0.0430311	0.11217	0.124748	0.125206	-0.165866	-0.187793	0.0905964	0.273511	-0.0620187	0.344266	-0.0383216	0.105014	-0.178391	-0.0972002	-0.076065	0.159194	0.0366114	0.0430604	0.0537933	-0.150911	0.106096	-0.212987	-0.114689	-0.0330364	-0.142558	-0.152167	0.0869274	0.0398926	-0.00618295	0.00287352	-0.168711	0.0175973	-0.195226	0.299982	-0.0287736	-0.111202	0.0658574	-0.0640867
1367661_at	S100a6	85247	S100 calcium binding protein A6	-0.585651	0.129922	-0.108606	-0.607944	-0.346023	-0.142093	-0.166432	0.274504	-0.0741452	-0.469499	0.108364	-0.369507	0.0513408	0.0436441	0.0346186	0.113722	0.0220593	-0.147108	-0.0560242	0.114483	-0.169547	-0.378147	-0.118551	-0.168983	0.132972	0.11545	0.11078	-0.23478	-0.144412	0.139715	0.809081	0.412887	-0.208731	-0.44942	-0.244802	-0.168833	0.890921	0.131219	1.00717	0.968208	0.129621	0.683135	0.309737	-0.351905	0.435297	0.22971
1367666_at	Hnrnph1	140931	heterogeneous nuclear ribonucleoprotein H1	-0.114336	0.0234795	-0.00898024	-0.0623493	0.0275173	-0.00481116	-0.146626	-0.0783012	-0.0145477	-0.0499889	0.0214747	-0.0674517	-0.00167312	0.159827	-0.00763732	-0.0542163	0.0886066	-0.14707	-0.0708986	-0.0427091	0.0434394	-0.00287101	0.0227691	0.00130806	0.0484	-0.0671234	0.0460393	0.0393239	-0.041111	-0.00745046	0.0609783	-0.0235952	-0.0621055	-0.00368997	0.0603607	-0.0644536	0.220024	-0.0534967	0.170886	0.145685	0.0223522	0.137383	-0.0385362	0.0782324	0.0175523	0.00530241
1367667_at	Fdps	83791	farnesyl diphosphate synthase	0.822684	-0.0629443	-0.124951	0.882903	-0.25666	-0.123075	0.0199449	0.00333553	0.0725823	-0.00340126	0.0179183	-0.162971	0.470542	-0.132752	0.0797496	0.655149	0.0505241	0.421457	0.448287	0.366211	0.296432	0.290062	-0.043784	-0.042637	0.293665	0.203593	0.285509	0.331719	0.0361556	0.407338	0.277263	0.0821525	0.24208	0.316329	0.26014	0.212414	0.224621	-0.153596	-0.183547	-0.00665169	-0.190994	-0.263956	0.0360802	-0.0719603	0.00195532	-0.328004
1367668_a_at	Scd2	83792	stearoyl-Coenzyme A desaturase 2	4.25381	0.0890634	-0.104529	6.04566	-0.159403	0.102837	0.23184	0.373157	0.0635487	0.583447	0.360242	0.577354	-0.204386	0.377174	0.233032	-0.128037	0.113643	-0.280434	-0.317033	0.162854	0.311838	-0.741608	-0.0874394	-0.0191788	-0.0349216	0.096001	0.310331	-0.225662	0.125597	-0.0130051	0.401955	-0.204419	-0.20285	0.129458	-0.20625	-0.156988	1.39142	0.428105	1.21079	1.0646	0.215987	0.919871	0.557952	-0.142111	0.98475	0.564137
1367671_at	Pcna	25737	proliferating cell nuclear antigen	-0.139556	0.16546	0.0559155	-0.0829617	-0.00846505	0.120289	-0.207102	0.0632091	0.149514	-0.117849	-0.0204707	0.0140831	-0.185887	-0.0156129	0.165823	0.352366	0.229058	0.13965	-0.303476	-0.00684857	0.0965037	-0.443476	-0.123088	-0.0905205	0.292803	0.182574	0.185866	0.233843	0.0617275	0.177108	0.801722	-0.14235	0.0907646	0.177075	-0.0241901	0.0319152	0.750015	0.0473885	0.64158	0.620911	0.19678	0.370478	0.359496	-0.046937	0.452576	0.461367
1367675_at	Cib1	81823	calcium and integrin binding 1 (calmyrin)	0.011014	0.0148498	-0.0290395	0.0023283	0.0473167	0.0709776	-0.0507823	-0.0761644	-0.109926	-0.00710921	-0.124911	-0.0525258	-0.153496	-0.054257	0.063781	0.0294174	0.042648	-0.00985204	0.140807	0.0799788	0.0773972	0.128622	-0.046764	-0.0219807	-0.0770729	0.0241565	-0.0531846	-0.205865	-0.0773294	-0.0108207	0.0678881	0.0670566	0.0620431	-0.035694	-0.040629	-0.0251996	0.123231	-0.0490604	0.0841762	0.103269	0.0424189	0.0179707	0.0706827	-0.0592206	0.175269	-0.0431273
1367677_at	Prdx5	113898	peroxiredoxin 5	0.307341	0.37547	0.28593	-0.0184021	-0.0981742	0.158275	-0.00334685	-0.0920741	0.0607376	0.249381	0.218486	0.296342	0.0377944	-0.0884104	-0.0414948	-0.097121	-0.037315	-0.0623182	-0.000135823	-0.127351	0.0775495	-0.1427	-0.231656	-0.110369	-0.0537314	-0.224117	-0.132497	0.153281	0.0711007	0.0163962	-0.261738	0.0037281	-0.0464275	-0.0851572	0.0195442	-0.129008	0.0292673	-0.0327093	0.0275494	0.0770714	0.0655858	0.195346	0.0339274	-0.019661	0.171409	0.0475011
1367679_at	Cd74	25599	Cd74 molecule, major histocompatibility complex, class II invariant chain	-0.495749	0.220214	-0.381067	-0.95612	-0.3674	0.0616883	0.53029	0.287253	-0.253088	-0.683645	-0.404021	-0.171202	0.308486	0.512406	0.414807	-0.0115501	0.286439	0.121994	-0.235758	-0.0860046	-0.405484	-0.252393	-0.0436399	0.244464	0.331602	0.0198222	0.251137	-0.357797	-0.172953	-0.11003	1.0118	0.134507	-0.0286369	0.192693	-0.596366	-0.234184	0.568261	0.192186	0.517905	0.727072	0.497448	0.59477	0.810165	-0.0510463	1.04613	0.81651
1367688_at	Scamp4	65170	secretory carrier membrane protein 4	0.248197	0.0629423	0.160429	0.216072	-0.0286408	0.0374387	0.12706	-0.0759735	0.0117245	0.0170888	-0.00235565	0.106993	-0.037256	-0.0822359	0.00297698	0.120288	-0.046638	0.0462648	0.319454	0.233235	0.361112	0.125616	0.0601386	0.0439491	0.196372	-0.000151395	-0.0496328	0.350471	0.0461742	0.225079	0.147653	-0.0429182	0.0713963	0.22325	0.099473	0.0760825	0.489296	-0.027616	0.159033	0.700174	0.0268008	0.490265	0.316787	-0.215502	0.194326	0.519869
1367691_at	Prkcdbp	85332	protein kinase C, delta binding protein	-0.191286	0.0317639	-0.26575	-0.024155	-0.208721	-0.00554279	-0.130722	0.0968052	0.416975	-0.521501	0.0884646	0.0686797	0.228988	-0.128184	-0.142861	0.0683463	-0.101346	-0.350117	-0.11711	0.391784	0.13481	0.0231698	0.12647	-0.131197	0.704262	-0.066876	0.14072	0.768807	0.092333	0.338714	0.576002	0.113665	0.309938	0.845965	0.159054	0.322618	1.03727	0.110783	0.525491	0.914001	0.0830212	0.331022	0.966045	0.278617	0.694172	0.834814
1367694_at	Hadhb	171155	hydroxyacyl-CoA dehydrogenase/3-ketoacyl-CoA thiolase/enoyl-CoA hydratase (trifunctional protein), beta subunit	0.844208	-0.0830837	0.13809	0.877624	0.086597	0.183949	0.525134	0.0805269	0.0672354	0.759548	-0.020121	0.122617	0.21784	-0.00102605	-0.0761121	0.203602	-0.192102	-0.173146	-0.167193	-0.0154334	0.0682327	0.147729	0.0833302	-0.00963218	0.348298	-0.0342378	0.0935047	0.287195	-0.0115255	0.0944724	0.590938	0.223876	0.453239	0.328727	0.176783	0.170036	0.379961	-0.0101901	0.0878667	0.739278	0.119788	0.453661	0.201089	-0.0261565	0.208072	0.369284
1367696_at	Ifitm2	114709	interferon induced transmembrane protein 2	0.168366	0.149848	0.0810848	0.13668	-0.17192	0.0339508	0.116854	-0.00787273	-0.0255451	-0.0562695	-0.0396439	-0.0587664	-0.160386	-0.116744	0.216748	-0.189639	-0.0855067	0.0666461	-0.126019	-0.0189001	-0.117855	-0.101271	-0.154157	-0.00852039	0.120431	-0.0765665	-0.111278	-0.0502318	-0.0408082	-0.0329324	0.475268	-0.000674093	-0.124319	0.0173205	-0.0443898	-0.0313083	0.308471	-0.0638637	0.406753	0.544098	0.145666	0.500823	0.11541	-0.287428	0.31067	0.555083
1367697_at	Mapk14	81649	mitogen activated protein kinase 14	0.173927	-0.0905006	0.159231	-0.0127412	0.0518089	-0.00681596	0.0170454	-0.193419	-0.0505083	0.0109426	0.0817614	0.0407572	0.00897096	-0.0699511	-0.0545017	-0.30029	-0.0605176	-0.0709093	0.0687535	-0.0832996	-0.0139699	0.0938969	-0.137148	-0.175646	-0.131612	-0.327392	-0.214303	0.0455572	0.178567	0.0598362	0.0173853	0.0793421	0.128315	0.11751	0.0501028	0.136444	-0.0157508	0.124094	-0.202487	-0.184426	0.0681684	0.0679777	0.229845	0.316179	0.248161	0.191985
1367698_a_at	Sept9	83788	septin 9	-0.18966	0.00401289	0.0508787	-0.197297	-0.134098	0.00269757	-0.0317882	0.193025	0.0867813	-0.111591	0.00502497	0.0975768	-0.290131	0.0312494	-0.0167985	-0.100866	-0.0182597	0.0545834	-0.00661987	0.157764	0.0349022	-0.322532	-0.0556673	-0.020705	0.0233244	0.114241	0.00278355	0.130825	-0.107579	-0.0307572	0.20015	0.0754025	0.016739	0.193175	-0.0817527	0.0290538	0.0330616	-0.0335799	0.0899014	0.0320608	-0.0883384	0.0763152	-0.104241	-0.115042	-0.00768558	-0.051847
1367701_at	Ramp2	58966	receptor (G protein-coupled) activity modifying protein 2	-0.00188164	-0.0628638	-0.044791	-0.00227375	-0.227034	-0.133391	-0.0570095	-0.185458	-0.0578526	0.0406138	0.0696335	0.207742	0.0743215	-0.18066	-0.154826	0.0437912	-0.206115	-0.0495035	0.200561	0.233463	0.188432	0.0616866	-0.199278	-0.00928186	-0.00426015	0.038801	-0.129751	-0.111881	-0.143818	-0.00575621	0.262337	-0.0834744	-0.0319268	-0.0278103	-0.118071	-0.181143	0.211133	0.0249318	0.193405	-0.0219141	-0.115093	0.154278	-0.0568861	-0.0917425	0.102356	0.351962
1367707_at	Fasn	50671	fatty acid synthase	0.92213	0.262166	-0.161068	1.28623	0.0503642	-0.0044321	-0.978581	-0.0784317	-0.00354728	-0.432865	0.134553	0.0263712	-0.54927	-0.177751	-0.193121	-0.67965	-0.129169	0.00139353	0.887017	0.279483	-0.183199	-0.766815	-0.0982986	-0.264953	-0.202552	0.0443822	-0.301916	-0.0628588	-0.420424	-0.173336	0.0067351	0.0668861	-0.105201	0.559217	0.337451	0.658352	0.740396	0.422153	-0.157145	-0.299314	0.0611344	-0.274627	-0.284902	0.233437	-0.0190322	-0.536331
1367709_at	Cd63	29186	Cd63 molecule	0.878735	0.506953	0.360911	0.562527	-0.183149	-0.132841	0.452036	0.058496	0.124515	0.0340575	-0.117589	-0.168267	0.203742	-0.280746	-0.211437	0.668531	-0.0588956	0.355709	0.268684	0.530765	-0.0507187	0.384138	-0.377543	-0.142103	-0.449246	-0.339605	-0.682983	-0.215046	0.167074	-0.460005	0.0406717	-0.455967	-0.486592	-0.0305731	0.071958	0.0591089	0.811234	0.0347447	0.633362	0.454403	-0.167153	0.337575	0.459625	-0.0298443	0.354382	0.460689
1367710_at	Psme2	29614	proteasome (prosome, macropain) activator subunit 2	0.0782895	0.109911	0.0917385	0.220441	-0.143278	0.100375	0.161555	0.00208031	0.0162914	0.0914327	-0.0254115	0.109961	0.139105	0.106555	0.150743	0.0607052	0.057932	0.0241506	0.0533681	0.0860944	0.0289992	-0.0452309	0.0265963	0.016004	0.266167	0.0792371	0.0908643	0.0867463	0.0169921	0.0388384	0.16244	0.0942359	0.131196	0.0833834	0.0142184	-0.0399269	0.0935441	-0.0717602	0.15484	0.11825	0.0839685	0.0603989	0.172422	-0.163894	0.435624	0.162458
1367712_at	Timp1	116510	TIMP metallopeptidase inhibitor 1	-0.116871	0.195398	0.0183141	0.0992742	-0.112429	0.147648	-0.131287	-0.125415	-0.225679	-0.171838	0.0459853	0.00542546	0.123078	0.326368	0.1915	0.0202611	-0.0125378	0.0362834	0.000864156	0.0885208	0.132938	-0.252095	-0.0706974	0.0811442	0.164757	-0.0147818	0.199656	0.00211386	0.0593983	0.163194	0.774674	0.117199	-0.0757026	-0.25493	-0.0201476	-0.159545	1.85714	0.36553	1.8126	2.01769	0.43105	1.42578	1.12667	-0.232579	1.38901	1.18464
1367713_at	Eif2s1	54318	eukaryotic translation initiation factor 2, subunit 1 alpha	0.176452	-0.0372777	0.00587902	0.171479	0.0443628	0.0967798	-0.101163	-0.190614	-0.090658	0.00379253	-0.152409	-0.192446	0.0159672	0.0627939	-0.117747	0.00886363	-0.030905	-0.128766	0.390775	0.0687834	0.434304	0.0710448	0.139171	-0.0183846	0.177415	0.00316749	0.0580293	0.383896	0.0517389	0.168238	0.276099	-0.12498	0.0272694	0.309946	0.00179127	0.165495	0.517608	0.0892056	0.250115	0.420638	0.0753507	0.0783009	0.0891062	-0.0376251	0.0904239	-0.0699708
1367716_at	Itfg1	171083	integrin alpha FG-GAP repeat containing 1	-0.10978	-0.0995171	-0.0439278	0.0269262	0.0283805	-0.00498407	-0.0304391	0.097464	0.184247	-0.0916441	-0.0394785	0.0319233	-0.0724654	0.117787	0.0147988	0.161052	0.162607	0.167569	0.0718218	0.173526	0.264484	-0.0552856	0.0178369	-0.000192296	-0.0524645	0.0983057	0.138469	0.100692	-0.00852478	0.00350597	-0.0357374	-0.0848831	-0.000716425	0.124903	0.07009	0.0824684	0.224071	0.0361388	0.0860616	0.301691	0.00839576	0.17208	0.0465954	0.0367527	0.0875904	0.0770972
1367718_at	Chkb	29367	choline kinase beta	0.220642	-0.0490272	0.0355547	0.301163	0.0480841	0.105735	-0.0952729	0.0330615	-0.141422	0.33225	0.218144	0.173448	0.211875	0.0861407	0.154915	-0.0181271	0.0190971	-0.171564	-0.207459	-0.0793548	-0.13881	-0.0519398	-0.0126892	-0.03004	-0.0554431	0.157586	0.0310963	-0.123277	-0.0694748	-0.0995898	-0.152707	-0.0484573	-0.0961879	0.0649273	-0.0649285	0.00380117	0.129723	-0.0741245	0.15765	0.0174889	-0.187793	0.0259999	-0.0341204	0.00861512	-0.0253531	0.0977586
1367719_at	Ubr5	117060	ubiquitin protein ligase E3 component n-recognin 5	0.225428	-0.0464582	-0.0406158	0.0383636	0.0725352	0.0359216	0.127239	0.0732135	0.0579599	0.170056	0.132938	0.0338605	-0.0840896	0.27115	-0.026655	-0.155089	0.0945873	-0.0561174	0.158762	0.0944949	0.187578	0.0797061	-0.0291709	0.0148453	-0.0333513	0.100682	-0.0255463	-0.191313	-0.0326383	-0.0495962	0.0138562	-0.0531316	-0.063661	0.0870597	0.00176426	-0.00475882	-0.0590923	-0.0874621	-0.0386464	-0.167957	-0.0430131	-0.1378	0.0673353	-0.0217031	0.0377238	0.0404484
1367721_at	Sdc4	24771	syndecan 4	-0.00285552	-0.305261	-0.294462	-0.0889599	-0.183646	0.157329	-0.122042	-0.19765	-0.204167	-0.139131	-0.188566	-0.393011	0.181351	0.259649	0.181099	-0.0607858	-0.14919	-0.193205	0.136447	-0.425162	0.165354	-0.121607	0.203093	-0.0374177	-0.138451	0.00481205	-0.282363	-0.232483	-0.0351234	-0.169972	-0.217631	-0.106404	-0.061556	-0.422892	-0.0125072	-0.188199	-0.184005	0.129332	0.10226	-0.0621202	-0.138026	0.0623976	0.156671	-0.0932865	0.139689	-0.0859418
1367724_a_at	Atp6v0e1	94170	ATPase, H+ transporting, lysosomal, V0 subunit e1	0.200655	0.0788105	0.0923858	0.0688868	0.0247707	0.0367115	0.0684263	-0.0165565	0.00600359	0.215521	-0.0738323	-0.0533656	0.0656129	0.0256558	0.0137073	0.416196	0.00454405	0.0733478	0.268783	-0.0292619	0.0900252	0.27864	-0.0457121	-0.0294042	0.0233017	-0.110807	-0.0934665	0.081089	0.0881138	-0.0100018	0.0338763	-0.00266514	-0.0636992	-0.0431074	-0.0695256	0.0286604	0.135404	-0.0419722	0.0638471	0.423052	0.0715217	0.110161	0.139237	-0.0521302	0.177798	0.231206
1367725_at	Pim3	64534	Pim-3 proto-oncogene, serine/threonine kinase	0.35763	-0.752103	-0.22642	0.154731	-0.269947	-0.0864154	0.0040773	-0.462838	-0.292141	-0.0753737	-0.238476	-0.346068	0.0200636	0.196575	0.299487	-0.253289	-0.276217	-0.371144	0.0629897	-0.4752	0.149042	0.0225481	-0.0367808	-0.450192	0.298357	-0.130987	-0.441945	0.19272	0.362541	0.273243	-0.108959	-0.526971	-0.180706	-0.345536	-0.153621	-0.362994	-0.523779	-0.488772	-0.603063	-0.126089	-0.29087	-0.316256	-0.266743	0.0339902	-0.273972	-0.0972391
1367728_at	Tsn	60381	translin	-0.140451	0.0436383	0.0384112	-0.291227	-0.0899306	-0.0319111	-0.172808	0.0225454	0.0645097	-0.237446	-0.167904	-0.131882	-0.376513	-0.0534069	0.0125917	0.108394	0.247519	0.0848554	0.320652	0.141075	0.321472	-0.271682	0.0325752	-0.108734	0.194386	0.0491126	0.120732	-0.0240806	0.078291	-0.0823478	-0.117138	-0.0582957	-0.166801	0.0401804	0.017026	-0.00526714	0.212608	0.0742962	0.176159	0.101936	0.028792	-0.139116	0.0328686	0.0741889	0.0402626	0.0228866
1367729_at	Oat	64313	ornithine aminotransferase	-0.680425	-0.0614678	-0.291472	-0.185451	0.119333	-0.0246833	-0.306888	0.661748	0.380771	-0.768958	-0.0532667	0.121989	-0.619253	0.123258	0.341522	-1.12866	0.34227	0.223266	-0.201088	-0.336955	0.063	-1.02463	0.352892	0.0574253	-1.45593	0.138131	-0.364724	-1.51893	0.141765	-0.401098	-2.65677	-0.548792	-1.53265	-1.96462	-0.28905	-1.0296	-1.5695	0.0642215	-1.16522	-1.8468	-0.363194	-1.39939	-1.73134	0.108284	-1.41084	-1.30239
1367733_at	Car2	54231	carbonic anhydrase 2	-0.267936	0.0817675	-0.436269	-0.0894581	-0.395962	0.0899769	-0.590362	0.29698	0.294944	-0.731047	0.0020636	0.209253	0.898214	-0.294483	0.299579	1.13936	-0.202518	-0.0106986	-0.314878	0.0108445	-0.123709	0.866277	0.331942	0.431672	2.37523	0.571681	0.923849	1.99915	0.13677	0.310168	1.49906	0.276824	0.981883	1.97167	-0.197378	-0.0639147	0.685789	0.123033	0.571419	0.784098	0.329265	0.588036	-0.574496	-0.204878	-0.529033	0.833984
1367734_at	Akr1b1	24192	aldo-keto reductase family 1, member B1 (aldose reductase)	-0.00272796	0.109895	0.156608	0.0635723	-0.16811	0.00749936	0.202322	0.0199023	-0.1192	-0.0914927	-0.0328665	0.0433893	-0.080876	0.101612	0.106385	-0.252759	-0.0418376	0.00399479	-0.0253875	0.127849	0.0994197	-0.412197	-0.0541597	0.0344554	0.103976	-0.0757065	-0.112743	0.023387	-0.104295	-0.0752105	0.0845363	-0.0353044	0.00945339	0.0740078	0.0493532	0.0110259	0.0216011	-0.0741251	0.188146	0.262873	0.159621	0.328101	0.122634	-0.320207	0.466737	0.122114
1367736_at	Rraga	117044	Ras-related GTP binding A	0.0120995	0.152454	0.0744158	-0.104077	0.0605402	0.000475564	-0.076818	-0.129346	0.0119551	-0.0408823	0.00127052	-0.170626	-0.136806	-0.136365	-0.0179028	-0.136359	0.0573421	0.0375883	0.106387	0.0473622	0.139273	-0.0757909	0.0178806	-0.168698	-0.0741375	-0.12768	-0.0577273	-0.0959319	-0.0809184	-0.0746181	-0.228534	-0.158091	-0.249447	0.0951536	0.0011474	0.149283	0.0176551	0.0582547	-0.0536349	0.0735739	0.128429	-0.00716201	-0.14056	-0.0565661	-0.065511	-0.249919
1367740_at	Ckb	24264	creatine kinase, brain	-0.2268	0.127628	-0.061634	-0.2396	-0.125242	0.0904592	0.0534038	0.193549	-0.0039074	-0.129732	-0.153313	0.0793362	-0.245947	-0.169615	0.30571	-0.0852794	0.249827	0.326252	-0.159014	0.049296	-0.0173469	-0.403025	-0.0198883	-0.00165643	-0.0511928	0.0259112	-0.0255773	-0.0433656	-0.23158	-0.136486	0.148569	-0.0279042	-0.0336688	-0.0422628	-0.00805429	-0.145286	0.0254812	-0.0275312	0.314057	0.435708	0.0636436	0.373192	0.342683	-0.00071688	0.489849	0.216659
1367741_at	Herpud1	85430	homocysteine-inducible, endoplasmic reticulum stress-inducible, ubiquitin-like domain member 1	0.571037	-0.614397	-0.179997	0.63131	-0.0816926	-0.0675328	0.186451	-0.418824	-0.3183	0.162939	-0.23031	-0.415302	-0.233599	0.147021	-0.0636156	-0.211421	-0.0300004	-0.430206	0.542785	-0.164622	0.289253	-0.102208	0.0942245	-0.357153	0.116659	-0.345242	-0.384594	0.357515	0.482598	0.191605	0.064812	0.0534488	0.112196	0.0451308	0.216585	0.157146	-0.0771183	-0.377652	-0.443442	-0.236294	-0.0832593	-0.0857147	-0.177834	-0.291285	-0.216375	0.215283
1367743_at	Pfkl	25741	phosphofructokinase, liver	0.181762	-0.193596	0.13005	0.336075	-0.0281814	0.151002	0.0449258	0.0354623	-0.0248162	0.213282	0.0151999	0.350654	-0.227269	-0.149021	0.195932	-0.00272758	-0.308298	-0.192068	0.0236706	0.0294448	0.16476	0.122474	-0.0636053	-0.0186924	0.0597252	-0.0191222	-0.119784	-0.0535189	-0.183092	0.0211409	0.0732047	-0.145653	-0.0110664	0.0980608	0.0786558	0.0824793	0.168242	-0.222175	-0.00190593	0.20261	0.0938152	0.359195	0.28861	0.0522965	0.339718	-0.0485853
1367744_at	Maged2	113947	melanoma antigen, family D, 2	-0.419322	-0.0900351	-0.0119859	-0.114306	-0.0515668	-0.227979	0.0483861	0.0264029	0.164859	-0.330705	0.0519001	0.00144078	0.16041	0.0753714	-0.183118	0.246258	0.139763	0.180883	-0.297235	0.0130397	-0.116044	-0.0901784	0.00127623	0.134681	0.164417	0.0733945	0.0429093	-0.0846931	-0.133223	-0.123781	0.375259	-0.0381246	0.152533	-0.00699378	0.0521225	-0.0493004	0.212268	-0.0112615	0.350648	0.059502	0.0327187	0.0416188	-0.112953	0.0302007	-0.0172873	0.141675
1367747_at	Arl3	64664	ADP-ribosylation factor-like 3	-0.14485	-0.0275423	-0.00100419	-0.154973	0.0168282	0.0384393	0.0221533	-0.0491537	0.129579	-0.0385265	0.0306802	0.0379188	-0.234442	-0.0792569	-0.0547847	-0.0717841	0.139448	0.102865	-0.0505611	0.0639525	-0.0275248	-0.102581	-0.0095611	0.0293386	0.111457	0.0651273	0.0316549	-0.102226	-0.00747901	0.00305966	-0.122783	-0.0968843	0.00662404	-0.177665	-0.0353179	-0.274199	0.0890151	-0.0349613	0.138207	0.0704606	-0.0124493	-0.110517	-0.0167436	-0.0290773	-0.0953655	0.210034
1367748_at	Arf5	79117	ADP-ribosylation factor 5	-0.0469492	0.0601751	0.0616364	-0.00306524	-0.0104305	0.195632	-0.0289907	-0.0827352	-0.0011403	0.0803856	-0.0259273	0.122589	-0.176455	-0.157855	0.14839	-0.253256	-0.0388898	0.00413424	0.118022	-0.0732247	-0.0770747	-0.105804	-0.021129	-0.00825686	-0.132859	-0.0193738	-0.138506	-0.257588	-0.0865933	-0.1738	-0.149113	-0.0264011	0.0196582	-0.105532	-0.0224686	-0.0368462	-0.147131	-0.0768303	-0.248499	-0.3371	-0.196053	-0.21888	-0.133554	0.00845168	-0.0955315	-0.0157051
1367749_at	Lum	81682	lumican	-0.165916	-0.569086	-0.362815	-0.238146	-0.447583	-0.132789	-0.0603876	-0.00477135	-0.0299329	-0.196245	0.00487499	0.296945	0.216411	0.600581	0.0566011	-0.600103	-0.217337	-0.499559	-0.237457	-0.0713187	0.241825	-0.451341	-0.510827	0.443233	0.512741	-0.154095	0.286158	-0.824143	0.198822	-0.236488	1.96813	1.23254	-0.24927	-0.272958	-0.643348	-0.659308	0.263472	0.600424	0.386966	0.387546	0.330108	0.0406077	0.447605	0.311527	0.652501	-0.165617
1367750_at	Prpsap1	64390	phosphoribosyl pyrophosphate synthetase-associated protein 1	-0.703938	-0.0135165	-0.0363943	-0.614798	0.0788296	-0.0219443	-0.362768	-0.0886133	-0.163296	-0.58217	-0.115274	-0.029128	-0.407006	-0.178195	0.00661148	-0.0772272	0.0126121	0.122807	0.0673926	-0.0251044	0.04638	-0.0194902	-0.00221668	-0.0988409	-0.15593	-0.0664767	-0.184225	-0.167887	-0.12965	-0.124429	0.0430696	-0.0879871	-0.0630248	-0.184288	-0.139216	-0.16905	0.0589023	-0.118255	0.0134608	0.0771808	0.0323034	-0.0297113	-0.0193522	-0.0429091	-0.0637064	-0.103636
1367751_at	Dpm2	29640	dolichyl-phosphate mannosyltransferase polypeptide 2, regulatory subunit	-0.0398423	-0.00554016	-0.108162	-0.167578	-0.144053	-0.0299672	-0.103743	-0.00161169	-0.00305433	-0.115969	-0.167293	-0.182547	-0.107299	0.0196009	0.0661912	0.000928555	-0.0578727	0.143899	0.117823	0.245177	0.0377412	-0.395509	-0.186079	-0.166707	0.354108	0.0409235	0.0342948	0.278142	0.0462306	0.173015	0.244289	0.00530987	0.0719545	0.146095	-0.129271	0.0450493	0.0452196	-0.207499	-0.0686804	-0.00936093	-0.133739	-0.121771	-0.207355	0.0655566	-0.0750839	0.103128
1367752_at	Bcar1	25414	breast cancer anti-estrogen resistance 1	-0.00632438	-0.0685144	-0.0128068	-0.0580412	0.0608072	-0.0510474	-0.0468782	0.0493596	-0.0637761	-0.0864997	0.0483673	-0.0126518	-0.214958	-0.0216527	-0.05125	-0.272484	-0.151812	-0.10445	0.0301741	-0.0712172	-0.0580022	0.0301822	0.00526656	0.0417225	-0.132053	-0.159154	-0.0136971	-0.204696	-0.147752	-0.234896	-0.0469868	0.119128	-0.150011	0.141724	0.0362728	0.102095	-0.36043	-0.127579	-0.216713	-0.324729	0.0462596	-0.0548305	-0.271037	0.052405	-0.163701	-0.198778
1367753_at	Sec31a	93646	SEC31 homolog A, COPII coat complex component	0.044343	-0.0821676	-0.0206975	0.0216917	-0.140456	-0.106672	-0.0992827	-0.112788	-0.0884091	-0.026403	0.119716	0.16308	-0.275139	-0.406164	-0.390516	0.0158625	-0.214951	-0.106421	0.158673	0.0102415	0.141703	0.202469	0.0453461	-0.0245306	0.115614	-0.00246613	-0.142474	0.414965	-0.00746317	0.168028	0.151422	0.039027	0.0486154	0.544023	0.253949	0.306472	0.236516	0.185928	0.0810199	0.141449	0.056288	0.27813	-0.00552967	0.0015151	0.0569519	-0.0699782
1367756_at	Gfm1	114017	G elongation factor, mitochondrial 1	0.00477177	-0.00553237	0.186483	0.229659	0.164565	0.169654	0.0466356	-0.090323	-0.0392109	-0.0945179	-0.0338795	-0.017818	-0.266744	0.218742	-0.159599	-0.00641076	0.0489198	0.00978315	-0.105305	-0.040395	0.024232	-0.438168	-0.116162	-0.333581	0.0079506	0.0141558	0.102732	0.00826146	-0.0417489	0.0348501	0.0918239	-0.0418371	0.0621732	-0.0333267	0.0580023	0.05475	-0.0545436	-0.098232	-0.109494	-0.188656	-0.0877497	-0.0994559	-0.184317	0.00108841	-0.18798	-0.00676017
1367758_at	Afp	24177	alpha-fetoprotein	-0.920805	0.31454	0.282677	-0.902716	0.115443	0.168476	-0.0894569	-0.117948	-0.142946	-0.772312	-0.0457757	-0.0469015	-1.22132	0.242955	0.00173487	-0.608526	0.135052	0.271276	-0.129224	-0.00213811	0.378789	-1.25027	-0.22673	-0.378338	-0.201996	-0.15414	-0.121222	-0.246377	0.0539461	-0.204578	0.333659	-0.0762806	-0.01946	-0.368449	-0.260258	-0.105529	-0.340019	-0.292749	0.117931	0.0615083	0.0206919	0.0166366	-0.853201	-0.475387	-0.481213	-0.316453
1367759_at	H1f0	24437	H1 histone family, member 0	-0.079754	-0.148835	-0.313536	-0.398551	-0.170724	-0.292635	-0.323026	-0.0504047	-0.0658348	-0.316663	-0.0278556	-0.209025	-0.350014	-0.187999	0.0547892	-0.276124	-0.135069	-0.0693677	-0.359089	-0.0185721	-0.019296	-0.298384	-0.341039	-0.274405	-0.366032	-0.00336172	0.0922364	-0.703758	-0.139702	-0.435849	-0.639048	-0.364917	-0.395786	-0.514815	0.0429977	-0.28723	-0.0486058	-0.0111641	0.0360713	-0.292881	-0.537672	-0.373285	-0.352357	-0.0306238	-0.246847	-0.117805
1367761_at	Ndel1	170845	nudE neurodevelopment protein 1-like 1	-0.153351	-0.224177	-0.0764872	0.294058	0.0531502	-0.00874615	0.305499	0.222838	0.282645	-0.124308	0.0223714	0.0249868	-0.178129	-0.00796378	0.118354	0.00135273	-0.161294	-0.0563624	0.0063253	-0.149095	-0.0188713	0.136546	-0.0522108	0.100742	-0.0683304	0.0625077	0.0654944	0.0145529	-0.0645621	-0.0366695	0.0578334	0.0150716	-0.0152557	0.0365835	-0.0744944	-0.121376	0.00949507	-0.251058	-0.108951	-0.0152258	-0.0866946	0.0357439	-0.0902702	-0.184787	-0.0172387	-0.0499174
1367764_at	Ccng1	25405	cyclin G1	-0.0254382	0.131238	0.0315659	-0.209575	-0.00408972	0.16707	-0.153044	0.0971437	0.0523344	-0.0741078	0.125805	0.151639	0.133017	0.123772	0.0577707	0.21472	0.182354	-0.238859	0.0965377	0.135209	0.43299	-0.136654	0.191433	-0.00636208	-0.181872	-0.165872	-0.27925	0.265947	0.0218022	0.265795	0.372874	0.0187129	0.0456282	0.0890412	-0.201015	0.0544502	1.05886	0.225375	0.740036	1.50335	0.267065	0.86018	0.780606	-0.140762	0.546429	0.634653
1367765_at	Tcn2	64365	transcobalamin 2	-0.0166954	0.276076	-0.304947	0.287374	0.528207	0.438936	0.0954851	0.123174	0.114907	-0.0759278	0.0951825	-0.0608666	-0.221796	0.155876	-0.208662	0.378087	0.0794118	0.338626	-0.25769	-0.201321	0.141437	-0.316775	-0.417498	0.273866	-0.157285	-0.567717	-0.36084	0.201303	0.0334322	0.124828	0.237327	0.0789047	-0.0189386	-0.141732	-0.0146326	0.0715215	-0.00172924	0.549358	0.470392	-0.64205	-0.270013	-0.294947	-0.532181	-0.356488	-0.208093	-0.0840482
1367767_at	Hmgcl	79238	3-hydroxymethyl-3-methylglutaryl-CoA lyase	0.460625	-0.0742823	0.0600494	0.659214	0.0319821	0.010294	0.158333	-0.0315046	-0.0910345	0.380695	-0.0701678	-0.00828914	0.12638	0.0213174	-0.108251	0.0320387	-0.0377542	-0.0843862	-0.0955945	-0.0766964	0.0327186	0.0489771	0.0376458	-0.0297611	0.117472	0.00223056	0.0811204	-0.0362587	0.0642606	0.0192842	0.12866	0.202559	0.288446	0.0613639	0.0904259	0.103522	-0.0624821	-0.0356124	-0.0454493	0.0591523	0.0259154	0.143626	-0.173734	-0.00807518	-0.0137362	0.0720373
1367769_at	Polr2g	117017	polymerase (RNA) II (DNA directed) polypeptide G	-0.060215	0.0318303	0.0144784	0.0288344	0.00948961	0.0248693	-0.101435	-0.0511972	-0.0134974	-0.155133	-0.0412956	-0.0435463	-0.0723575	0.0463882	0.0193058	0.140114	0.00950368	0.120194	-0.0231697	0.00833467	0.118111	-0.0358323	-0.0505361	-0.0670333	0.0288016	-0.121665	-0.0085489	0.157771	0.105845	0.0470345	0.220073	0.0520233	0.0751699	0.120764	0.0890293	0.156654	0.308798	-0.0475454	0.240635	0.276886	0.0876962	0.113159	0.199172	0.0776764	0.243612	0.142219
1367771_at	Tsc22d3	83514	TSC22 domain family, member 3	-0.467881	-0.690064	-0.665546	-0.455906	-0.146146	0.0808754	-0.237713	-0.57343	0.000380273	-0.26665	-0.278117	-0.670202	-0.368267	0.292372	0.0205166	0.0281273	-0.0563527	-0.325658	0.607802	-0.421	0.378095	-0.514377	-0.0403723	-0.665765	-0.120509	-0.383933	-0.37357	-0.0380522	0.192119	-0.101274	-0.0569343	-0.138741	-0.0582026	-0.634346	-0.346898	-0.54844	-0.570598	-0.528299	-0.72992	0.152788	-0.411349	-0.371053	-0.538083	-0.122183	-0.463186	-0.041838
1367772_at	Clns1a	65160	chloride channel, nucleotide-sensitive, 1A	0.0159627	-0.0715008	-0.0876102	0.0732513	0.11619	0.0807349	-0.0157969	-0.0108452	-0.0242774	-0.0486328	-0.114614	-0.0938984	-0.0174992	0.0734514	0.107115	0.00121633	-0.0830103	0.0489915	0.0841292	-0.00270912	0.0783867	-0.0969974	0.0271078	0.0338204	0.27681	0.100546	0.0370711	0.159621	0.00757056	0.0519092	0.127999	-0.0171064	0.0138802	0.212361	0.00804206	0.113906	0.19899	0.0324302	0.212049	0.288704	0.0335057	0.0311035	0.126762	-0.0134879	0.216812	0.0430585
1367775_at	Amacr	25284	alpha-methylacyl-CoA racemase	-0.285825	0.0898887	-0.306793	-0.674239	0.10102	-0.487075	-0.158126	0.368943	0.215323	-0.475007	0.0461036	-0.312531	-0.322876	-0.0489066	-0.118409	-0.667666	-0.282591	-0.217537	-0.31217	0.0720905	-0.174291	-0.22657	0.0615241	0.0812888	-0.398991	-0.0749507	-0.283526	-0.243918	0.0841425	-0.0638892	-0.205126	0.170642	0.0169574	0.218454	0.25576	0.22374	0.121372	0.545111	0.512999	-0.272418	0.0324621	-0.0623975	0.057255	0.034281	-0.327085	0.121828
1367776_at	Cdk1	54237	cyclin-dependent kinase 1	-1.80063	0.0802277	0.097865	-1.43227	-0.112451	0.695129	-1.63917	-0.162213	0.00614367	-1.66679	0.444298	0.135853	-0.942551	0.37029	0.041751	-0.37064	0.251465	-0.524901	-2.56873	-0.367441	-0.388441	-3.05239	-0.282332	-0.789885	-0.495369	0.580218	0.19043	-0.791246	-0.265675	-0.295357	0.689054	0.0851293	-0.296408	-1.23529	-0.0270707	-0.638989	2.11392	0.533166	2.33129	1.39419	0.927191	1.13213	0.173752	0.417468	0.744989	1.13425
1367777_at	Decr1	117543	2,4-dienoyl CoA reductase 1, mitochondrial	1.53874	-0.0104529	0.409715	1.29421	0.0999866	0.247185	0.982894	0.0471853	-0.0105493	1.10117	-0.250958	-0.113297	0.697291	0.153527	-0.138871	0.496878	-0.128456	-0.234523	0.0647594	-0.0122262	0.26317	0.704943	0.0845187	0.0256421	0.497522	0.147776	0.335728	0.0235173	0.0708437	-0.0289455	0.538998	0.332649	0.54668	0.184578	0.28323	0.1145	0.165201	0.00259389	-0.121674	0.225204	0.0433533	0.174904	0.0738051	0.135277	0.095184	0.359103
1367780_at	Pttg1	64193	pituitary tumor-transforming 1	-0.504507	0.199919	0.175991	-0.678853	0.0399387	0.205968	-0.596484	0.021765	-0.320415	-0.869289	0.278051	0.000169029	-0.0888819	0.260458	0.132791	-0.301789	-0.183735	-0.394819	-1.53511	-0.393577	-0.453098	-1.487	-0.115919	-0.698509	-0.28725	0.192432	-0.00502001	-0.225147	-0.0858952	-0.160887	0.51944	-0.0270147	-0.435185	-0.626738	0.0708684	-0.309572	1.22929	0.171994	1.37325	0.642208	0.574503	0.680849	-0.0527808	0.203663	0.216876	0.72336
1367786_at	Psmb8	24968	proteasome subunit beta 8	-0.269334	0.186431	0.107801	-0.0804056	-0.0846433	0.237926	0.207848	-0.00958216	-0.00949053	0.137156	0.150597	0.311902	-0.39589	0.00609931	0.279499	-0.712759	-0.170842	-0.332494	-0.234964	-0.0222151	-0.17075	-0.49948	-0.0259312	0.0328262	-0.476091	-0.371856	-0.580938	-0.634757	-0.301349	-0.340869	-0.127744	-0.126163	-0.171538	-0.250926	-0.100781	-0.214597	-0.181748	-0.205937	0.114253	-0.334732	-0.0774222	-0.116196	0.25804	-0.166601	0.747191	0.111916
1367787_at	Ica1	81024	islet cell autoantigen 1	0.0691662	0.0807139	0.0513231	0.335595	0.133661	0.185444	-0.0734709	0.12107	-0.039351	-0.104516	0.152497	-0.193001	0.198734	0.0753784	-0.192692	0.16807	-0.0605494	-0.0213539	-0.0665271	-0.178087	0.164108	0.131007	0.09127	0.154929	0.248475	-0.0624048	0.177449	0.161013	0.0623724	-0.166366	0.680848	0.205564	0.341285	0.410267	0.0155178	-0.0448494	0.699741	0.0678046	0.549214	1.50972	0.246107	0.979336	0.244553	-0.0218778	0.0849808	0.577477
1367788_at	Phkg2	140671	phosphorylase kinase, gamma 2 (testis)	-0.01467	0.0291129	-0.0309601	-0.137614	0.08871	0.0818949	-0.226897	-0.154127	-0.153561	-0.142199	-0.0123007	0.0335416	-0.158429	-0.00601776	0.103533	0.0394588	0.00672044	-0.0295956	0.103658	0.100733	0.151476	0.0755989	-0.0272976	-0.0933653	0.0684733	0.0227558	-0.00799555	0.0333378	0.00999037	0.0375865	-0.153844	-0.147727	-0.248555	-0.00874128	0.0663147	0.0233199	-0.196052	-0.190958	-0.14133	0.0600581	0.0561827	-0.0396995	-0.14028	-0.24176	-0.0220602	-0.105586
1367790_at	Snd1	64635	staphylococcal nuclease and tudor domain containing 1	-0.128879	-0.0984264	-0.0683181	0.226176	0.0163966	0.128493	0.0401219	-0.0684158	-0.0186146	-0.0751158	-0.011788	0.119131	-0.0958635	-0.124483	0.0200197	-0.0114254	-0.126055	0.0503692	0.129329	0.122181	0.184212	-0.141015	-0.04359	-0.0640527	0.121591	0.131006	0.229292	0.252289	-0.111448	0.18737	0.329733	0.0634824	0.239261	0.344416	0.127681	0.0108967	0.219059	-0.14898	0.0808205	0.284767	0.0823135	0.234615	0.0313555	-0.198797	0.0384029	0.148844
1367791_at	Ramp1	58965	receptor (G protein-coupled) activity modifying protein 1	0.0542372	0.0791887	0.02568	-0.177337	-0.0997617	-0.00180558	-0.0688284	-0.0808848	-0.0682339	-0.0462303	-0.0599042	-0.063095	-0.192886	-0.0659499	0.144484	0.00218943	-0.124598	0.213619	0.0421591	0.0767304	0.251188	-0.166866	-0.11915	0.0375441	0.101426	-0.0728949	-0.0616383	-0.122706	-0.0135635	-0.0987248	0.313341	-0.00155815	-0.189688	-0.165086	0.00202347	-0.165803	0.52122	0.018506	0.437002	0.618357	0.331467	0.551807	-0.179578	-0.184556	-0.174111	0.194949
1367792_at	Bpifa2	50585	BPI fold containing family A, member 2	-0.268571	0.0273271	-0.149444	0.0276504	0.0769066	0.0381301	0.0712727	0.240782	0.271705	-0.113296	-0.0106836	0.101264	0.340241	-0.065551	0.178563	-0.0440537	-0.0106818	0.0323501	-0.0489012	0.0435341	-0.0943454	-0.189343	0.0241991	0.005837	0.125902	0.0133633	0.156223	-0.0969041	0.22549	0.0775579	-0.0472751	-0.0374877	-0.0936332	0.0451657	0.156112	0.0903524	-0.18409	-0.00414654	-0.138031	-0.301503	0.0471843	0.093772	-0.502008	-0.0692885	-0.144645	0.0946459
1367795_at	Ifrd1	29596	interferon-related developmental regulator 1	0.235296	-0.19602	-0.00758871	0.384438	0.0444345	0.22843	0.224487	-0.0878348	0.211722	0.0325745	-0.119774	-0.249552	0.407243	0.668048	-0.00567746	0.191091	0.166225	-0.050886	0.441695	-0.63179	0.153526	0.147691	-0.0700502	-0.276212	-0.151333	-0.761607	-0.322101	0.205128	0.147337	0.0751005	0.271729	0.0328184	0.392682	0.0577325	-0.0649364	-0.0990086	1.07471	0.0105487	0.894007	1.66731	0.384725	1.01348	1.13659	0.221917	0.642704	0.51721
1367796_at	Mgat1	81519	mannosyl (alpha-1,3-)-glycoprotein beta-1,2-N-acetylglucosaminyltransferase	0.08059	-0.0900803	-0.0674757	0.0854565	0.0442733	0.0333005	0.091873	0.00459153	-0.0207001	0.0319183	0.100054	-0.0786566	-0.137029	-0.00574444	0.174182	-0.185351	-0.0336416	0.057057	0.187069	0.196262	0.314329	0.0971922	0.065608	0.135499	-0.0987882	0.106189	-0.0469101	-0.243499	-0.0372209	-0.09304	-0.0990893	-0.102533	-0.0544833	-0.10595	-0.06212	-0.219764	-0.0916716	-0.185471	-0.186864	0.0381686	-0.05553	-0.0128073	-0.0926693	-0.192342	-0.0514432	-0.23319
1367797_at	Men1	29417	multiple endocrine neoplasia I	-0.00222964	-0.125413	-0.13154	0.162507	-0.0724574	0.0938079	0.341279	0.239658	0.0730673	-0.0521497	0.0153348	0.0900683	-0.173953	0.0121472	0.137164	-0.10169	-0.0664602	-0.225802	-0.10003	-0.166682	0.116986	0.348999	-0.0620697	-0.0275698	0.0550607	0.0586362	-0.0206746	0.0936856	0.013752	0.0352521	0.0085486	0.167736	0.0993029	0.174286	0.0411993	0.120469	0.0631589	0.0397196	-0.0672634	-0.0398398	-0.00171868	0.0832835	0.293149	-0.0844254	0.235579	0.128818
1367799_at	Eef1a2	24799	eukaryotic translation elongation factor 1 alpha 2	-0.0432159	-0.0231837	0.011534	-0.264694	-0.128938	0.0391129	-0.108747	-0.0787714	-0.104639	-0.153926	-0.118085	-0.142407	0.0454857	0.0784766	0.0179236	0.141807	0.0936076	-0.0375999	0.211647	0.0669996	-0.0693295	-0.011633	0.144118	0.0884187	0.0942839	0.106109	0.112212	-0.0707143	-0.01311	-0.0187827	-0.314387	-0.0931049	-0.025657	-0.0556228	0.173672	0.00334566	-0.192448	0.111424	-0.102765	-0.281927	-0.0895375	-0.317357	-0.281133	-0.20876	-0.458588	-0.188044
1367802_at	Sgk1	29517	serum/glucocorticoid regulated kinase 1	-0.378234	0.133693	0.0886605	0.0788471	-0.0128343	0.145377	0.325047	0.708746	0.627572	-0.781928	-0.199445	-0.101479	-1.00925	-0.123118	0.383069	0.0606906	0.117413	-0.0849373	0.508947	-0.107035	0.659995	-1.51751	-0.385605	-0.880978	-0.513184	0.411961	-0.290906	-0.585254	-0.299836	0.116989	-0.422536	-0.85748	-0.749056	-0.455974	-1.03538	-0.464145	-0.244457	0.0429075	0.140373	-1.13417	0.428638	-0.19499	-0.183698	0.729218	0.0779219	-0.00124574
1367803_at	Nup54	53372	nucleoporin 54	0.0900874	-0.0607068	-0.0942538	0.259232	0.0162635	-0.0805523	0.130263	-0.17747	-0.0562099	-0.0146619	-0.0373985	-0.117593	0.157775	0.313185	0.262112	0.0520407	0.419581	0.02485	0.372267	-0.0477399	0.174708	-0.0242333	0.210823	-0.0439239	-0.0795261	-0.221263	-0.0624216	0.142861	-0.0161385	-0.00711447	0.148195	0.15085	0.280537	0.112058	0.036597	0.260863	0.0338364	-0.0746935	0.310996	-0.0331036	-0.0187854	0.0191023	-0.0329187	-0.108864	0.00708246	-0.0844645
1367808_at	Timm8b	64372	translocase of inner mitochondrial membrane 8 homolog b (yeast)	0.138862	0.0970518	0.0714254	0.169701	0.00911453	0.130204	-0.0333222	-0.0797614	0.021834	0.0445268	-0.00771763	0.0718537	-0.15554	-0.16527	-0.0251156	0.0165523	0.0348058	0.0853162	0.249357	0.0904316	0.282817	0.0143184	-0.0116753	-0.0452615	0.0617933	-0.0802061	-0.05282	0.105368	0.0108216	0.117475	0.17513	-0.0199247	-0.0217043	0.131915	-0.0125392	0.0398734	0.540323	0.0535192	0.254774	0.484473	0.15156	0.240906	0.243186	0.06221	0.208075	0.27311
1367811_at	Phgdh	58835	phosphoglycerate dehydrogenase	0.337262	-0.0566422	0.146738	0.654391	-0.0974779	-0.00220163	-0.276554	-0.994378	-0.356895	-0.0991967	-0.282659	-0.631303	0.851799	-0.775899	-0.408083	1.93351	0.344335	0.600232	-0.151051	-0.13077	0.386487	0.533538	-0.714364	-0.520362	1.50717	-0.742387	0.0140562	2.56665	0.335741	1.05542	2.35508	0.176333	0.818877	2.07796	0.710471	0.688387	1.91164	0.23936	1.30717	2.6391	0.681081	1.61553	2.04404	0.547625	1.52715	1.31649
1367812_at	Sptbn2	29211	spectrin, beta, non-erythrocytic 2	0.306404	0.0521436	-0.0497877	0.229518	0.0384257	0.103624	0.314977	0.0882696	-0.038045	0.21613	-0.00109981	0.116163	-0.0418688	-0.00133245	-0.0804277	0.244267	0.0760741	-0.0376565	0.0585259	0.0194441	-0.0185191	-0.0147311	-0.0787228	-0.142205	-0.153047	-0.0294696	-0.164244	-0.11834	-0.0270956	-0.0416262	-0.115919	-0.223914	-0.0263139	0.0718153	0.00350218	0.00674107	0.189546	-0.250995	0.089604	0.240346	0.179654	0.192036	0.133575	0.217926	-0.018537	0.138679
1367813_at	Ppp1r14a	114004	protein phosphatase 1, regulatory (inhibitor) subunit 14A	-0.157754	0.27592	0.369949	-0.250395	-0.194031	0.155221	-0.265908	-0.0449663	0.0132843	-0.289757	0.0613346	-0.179495	-0.492862	-0.175315	-0.070874	-0.271537	0.0287393	0.0672798	0.0457699	0.267233	0.110271	-0.185022	-0.186741	-0.221728	0.0457221	0.113188	-0.0930102	-0.225304	-0.128523	-0.128747	-0.0953177	-0.129424	-0.230481	0.0512139	0.16145	0.109356	0.109567	-0.0136381	0.0601476	0.0847946	0.018533	-0.117269	-0.139246	-0.211518	0.0899753	0.000969817
1367814_at	Atp1b1	25650	ATPase, Na+/K+ transporting, beta 1 polypeptide	1.30334	0.0771174	0.195055	1.03956	0.154146	0.399855	0.25031	0.140262	-0.0737565	0.612501	-0.0188506	-0.0341597	-0.119735	0.428518	0.18816	-0.130494	0.0906905	0.152499	0.188066	-0.138425	0.276756	0.459273	0.137635	-0.0037072	-0.215554	0.0800135	-0.213022	-0.494019	-0.00262351	-0.318183	-0.0518575	-0.0794283	-0.415343	-0.542973	-0.347742	-0.348184	0.377913	0.158381	0.296248	0.442625	-0.145088	0.203795	0.174311	-0.124873	0.111896	0.256382
1367816_at	Hopx	171160	HOP homeobox	-0.134719	0.45294	0.019113	-0.0372057	0.0145455	0.404626	0.0372138	-0.142436	-0.347504	-0.667601	-0.417075	-0.3649	-0.103244	0.538576	0.432895	-0.23724	0.0875156	0.0793841	-0.0736882	-0.0819272	0.172413	-0.306057	0.401849	0.0933156	0.226528	-0.0761718	-0.0061678	-0.302565	-0.191746	-0.0847284	0.204662	-0.23804	-0.195521	-0.235356	-0.210507	-0.263889	0.80014	0.451049	0.956164	0.641964	0.06905	0.651679	1.23688	-0.236796	2.02738	0.551252
1367817_at	Hdgf	114499	hepatoma-derived growth factor	0.217241	0.0116682	-0.155247	0.301163	0.18395	0.0486561	-0.106357	-0.0647414	-0.153418	0.333671	0.0908519	0.10151	-0.182178	0.115829	-0.0969192	0.281975	0.0774696	0.341599	0.312537	0.128397	0.23439	0.365463	-0.0156918	-0.000538861	0.182992	0.0286466	-0.196656	0.13125	-0.0888452	0.0962402	-0.266294	-0.428061	-0.382217	-0.0468619	-0.0799903	-0.131457	0.000406084	-0.13579	-0.00922525	0.0845358	-0.0914221	0.147063	0.358974	0.0442284	0.152375	0.0120397
1367818_at	Coq3	29309	coenzyme Q3 methyltransferase	-0.148652	0.0374568	-0.0574173	0.0482565	0.124292	0.160824	-0.0691186	-0.0388218	0.085594	-0.075683	0.0026571	0.074264	-0.21308	0.18872	-0.0285508	0.0659907	-0.0161034	-0.111395	0.113883	0.0880255	0.226454	-0.208266	0.081829	-0.0218199	0.262788	0.121307	0.153499	0.221393	0.0772686	0.114497	0.108241	0.0225336	0.268276	0.213378	0.019465	0.0404791	0.0545888	-0.0352223	-0.00461926	0.140689	0.0558984	-0.0230046	-0.128998	0.0799947	-0.0142839	-0.084301
1367820_at	Banf1	114087	barrier to autointegration factor 1	0.155568	-0.0030483	0.0981776	0.121176	-0.00252139	0.180462	0.146627	0.052339	0.0986334	0.206583	0.0630208	0.24405	-0.0183086	-0.0660534	0.000973963	0.199165	0.0363688	0.0821237	0.172923	0.200505	0.0435904	-0.222071	-0.0205162	-0.0453767	0.229318	0.0691351	0.118368	0.150305	0.024077	0.0828552	0.114881	0.0747247	0.111689	0.323107	0.129041	0.200503	0.426293	-0.116561	0.238961	0.578465	0.113526	0.305376	0.160888	-0.0886065	0.173452	0.392415
1367823_at	Timp2	29543	TIMP metallopeptidase inhibitor 2	-0.0768986	0.0228871	0.0759992	-0.0189505	0.00626277	0.176879	-0.0559783	-0.0516732	0.119271	-0.0775245	-0.0799168	-0.0571486	-0.108163	-0.155654	-0.189393	-0.24416	-0.264576	-0.0671659	-0.287637	-0.0229762	-0.554382	0.0638416	0.04545	0.0708912	-0.196277	-0.109783	-0.172724	-0.136489	-0.0420186	-0.267418	-0.0611263	-0.0385196	-0.132624	-0.282767	-0.118382	-0.08683	-0.0278768	-0.0210475	-0.0875589	-0.186937	-0.0330667	-0.0645173	0.1406	0.172118	-0.13042	-0.0678046
1367826_at	Nfe2l2	83619	nuclear factor, erythroid 2-like 2	-0.0196462	0.0442616	0.236185	0.311493	0.393972	0.445908	0.271231	0.153478	0.30425	0.288117	0.3353	0.216657	0.0364821	0.0280099	-0.00599554	0.301555	0.26749	0.0868778	0.037705	0.324678	-0.0742511	0.204571	0.0464912	0.211459	-0.0524863	0.267501	0.354367	0.0546865	-0.0845933	0.14506	0.195648	0.231827	0.0689909	0.279189	0.170139	0.223593	0.460018	0.151058	0.327623	0.0267183	0.346488	0.23524	-0.040473	-0.0502044	0.149195	-0.143501
1367830_a_at	Tp53	24842	tumor protein p53	-0.0500472	0.0470438	0.0986032	0.0353845	0.19953	0.19456	-0.094835	-0.0295533	-0.0873054	-0.0435587	-0.0658045	0.0749561	-0.0159908	-0.0496477	0.0157592	0.0633571	-0.0391432	0.0788652	-0.184027	0.0383937	-0.0886326	-0.048679	-0.0827411	0.0150424	0.00774128	0.0275584	-0.0733348	0.101185	0.106585	0.117106	-0.00942981	-0.0215207	-0.0798812	-0.0122221	-0.00610357	-0.038519	-0.0352632	-0.0693016	0.0163949	-0.110656	-0.063084	0.0218314	-0.0829316	-0.119832	-0.0648689	-0.100438
1367832_at	Lypla1	25514	lysophospholipase I	-0.488882	-0.0274514	-0.089839	-0.372249	0.0245758	0.00952467	-0.117507	-0.000138944	0.148019	-0.183372	0.0971015	0.0444699	-0.350538	0.280186	-0.143233	-0.253164	0.246499	-0.0776565	0.17258	-0.00514108	0.139782	-0.207426	0.111585	0.0519747	-0.169907	0.0589755	0.0349026	-0.0890721	-0.0609046	-0.049398	-0.269934	-0.0884261	-0.1336	-0.0580242	-0.0252622	-0.0241223	-0.226333	-0.0624233	-0.137309	-0.198012	-0.000956619	-0.147911	-0.0744557	0.0450702	-0.0737421	-0.225565
1367833_at	Psmc5	81827	proteasome 26S subunit, ATPase 5	0.328692	0.132824	0.151107	0.201732	-0.0132024	0.076096	0.0384946	-0.178812	-0.0343465	0.0848165	-0.0338102	0.0690524	0.208618	-0.0315115	0.0433869	0.246006	0.132683	0.127454	0.200997	0.127438	0.202817	0.0510614	0.0702505	-0.102399	0.407635	0.0846309	0.0837264	0.222531	-0.0334894	0.142338	0.0342386	-0.198228	-0.20412	0.0490755	-0.0146567	-0.0787862	0.168149	-0.0353144	0.0794091	0.224327	0.0369416	-0.0159323	0.0912863	-0.0112245	-0.0469005	0.0506051
1367836_at	Cpt1a	25757	carnitine palmitoyltransferase 1a, liver	0.841661	-0.124938	-0.237312	0.443186	-0.138408	-0.699118	0.747722	0.344139	-0.125061	0.218288	-0.717246	-0.562207	-0.446978	0.669363	-0.483609	-0.288783	-0.48824	-0.3621	-0.627677	-0.237278	0.275439	-0.0122413	0.100905	-0.264373	-0.00135553	0.204349	0.13432	-0.200375	0.213466	-0.169211	-0.241753	-0.381941	0.149551	-0.416044	-0.153685	-0.079383	0.200592	0.0185916	-0.0261459	0.102137	-0.242243	0.126235	0.930235	0.450728	0.569611	0.488895
1367839_at	Fdft1	29580	farnesyl diphosphate farnesyl transferase 1	0.59513	-0.0490091	-0.0344328	0.558636	-0.348654	-0.067994	0.126856	0.234191	0.156816	0.0858044	-0.0402739	-0.11266	0.75639	-0.0432736	0.361144	0.575995	-0.297637	0.127765	0.204227	0.021267	0.108063	0.580603	-0.0843364	0.154984	0.223647	0.0359646	0.228424	0.417295	0.0227905	0.331155	0.0302457	0.0982934	0.332536	0.136962	0.183338	0.262063	-0.0908323	0.0520916	-0.26862	0.0544965	-0.202968	-0.0478163	-0.0136709	0.0233089	0.0314212	-0.10181
1367844_at	Gnai2	81664	guanine nucleotide binding protein (G protein), alpha inhibiting activity polypeptide 2	0.235715	0.285879	0.212393	0.0605891	-0.162982	0.0818144	0.087982	0.071858	-0.0153874	-0.0359815	0.127993	0.0936771	-0.0625204	-0.152794	-0.0637623	-0.106959	-0.0771854	-0.037844	-0.121309	-0.0122068	-0.106418	-0.258489	-0.184944	-0.116179	0.0573556	0.0365355	-0.100796	-0.185629	-0.0895914	-0.0426194	0.19003	-0.0162894	-0.0936991	0.0223625	-0.0680745	-0.0189551	0.450708	0.0212279	0.406829	0.515676	0.0436924	0.46223	0.239186	-0.14517	0.26538	0.40259
1367846_at	S100a4	24615	S100 calcium-binding protein A4	-0.223223	0.254364	-0.268532	-0.589165	-0.236521	-0.0729193	-0.0699298	-0.018077	-0.208686	-0.950223	-0.5836	-0.6388	0.0295695	0.131346	0.292387	-0.0956713	-0.106066	-0.146986	-0.0074969	-0.0402592	-0.219046	-0.381907	-0.0130999	-0.103653	0.208398	0.315315	0.432039	-0.0642453	0.107523	0.488443	0.236852	0.418749	0.130937	-0.342338	-0.1253	-0.198352	0.458462	0.111774	0.496393	0.672889	0.363677	0.389531	1.1705	-0.0219457	1.48951	0.379876
1367847_at	Nupr1	100912108	nuclear protein, transcriptional regulator, 1	1.44399	-0.728169	-0.183151	1.86297	-0.0274026	0.222191	-0.0664539	-0.563163	-0.576578	0.720789	-0.308171	-0.986503	1.09382	-0.0968519	0.123389	0.640775	0.158755	0.00676894	0.810944	0.0404616	0.140824	1.43929	-0.193283	0.417421	-0.273262	-0.639994	-0.693814	-0.841584	-0.317297	-0.376498	-0.095765	0.107678	0.0801989	-0.0303138	0.57276	0.297036	1.09202	-0.599211	0.347591	1.76308	-0.47806	0.500651	1.70108	-0.566787	0.665958	1.50446
1367848_at	Dctn1	29167	dynactin 1	0.167809	-0.0583441	0.0326519	0.325635	-0.0357323	0.0348987	-0.0558185	0.158963	-0.0367783	-0.0191176	-0.126706	-0.0349011	0.0134294	-0.117951	-0.0606992	0.0917998	-0.144626	-0.261501	-0.110494	-0.0238881	0.0908925	-0.17941	-0.119351	-0.128514	0.259005	0.145381	0.0896137	0.358946	0.101214	0.175878	0.369782	0.123573	0.146427	0.169388	0.238691	0.12286	0.484758	0.069321	0.274191	0.60153	-0.0455896	0.481187	0.00123722	-0.131779	0.0920943	0.0924102
1367854_at	Acly	24159	ATP citrate lyase	0.174954	-0.101809	-0.32354	0.750608	0.00171538	-0.0824253	-0.643845	-0.0553077	-0.00546279	-0.452475	-0.0274799	-0.250786	-0.239445	0.0313586	-0.277923	-0.151793	0.113188	0.127439	0.982377	0.372368	0.189759	-0.575666	-0.0556443	-0.13966	0.228002	0.304052	0.0789903	0.117952	-0.154413	-0.0176126	0.136245	0.0842899	0.184935	0.607392	0.394836	0.555343	0.152207	-0.132784	-0.423282	-0.418554	-0.145438	-0.407973	0.0201086	0.30967	0.122341	-0.499769
1367855_at	Scarb1	25073	scavenger receptor class B, member 1	-0.0463079	0.0966146	0.0497316	-0.0649822	-0.0203781	0.0428108	0.0522715	0.403653	0.0622894	-0.219826	-0.0164288	-0.0657331	0.0433159	0.247783	0.253353	-0.226814	-0.361297	-0.225304	-0.349196	-0.0543792	0.0975994	-0.203983	0.0922476	-0.129855	0.040049	0.00875766	-0.0166817	0.0480114	0.20581	0.11916	0.454272	-0.0712376	-0.0350694	0.181197	0.0421862	0.129929	-0.29093	-0.159351	-0.00877364	-0.269487	-0.11534	-0.0207221	-0.116578	-0.145216	-0.127877	0.199993
1367856_at	G6pd	24377	glucose-6-phosphate dehydrogenase	0.854759	-0.0684175	-0.507414	2.01936	0.139006	0.113632	-0.184594	0.0662429	0.181664	-0.984975	-0.47642	-0.547839	-0.0485709	0.388947	-0.167594	-0.343128	-0.13453	0.0186989	0.425546	0.271386	-0.0893283	-0.751905	-0.0709924	-0.50661	1.29679	0.202273	0.355762	0.869031	0.283348	0.245888	0.847894	0.257734	0.494719	1.23196	0.464413	0.450432	0.79367	0.308594	0.459661	0.850185	0.111042	0.537504	0.967371	0.174832	0.93339	0.502804
1367857_at	Fads1	84575	fatty acid desaturase 1	0.700657	0.111912	-0.0843459	0.814979	-0.249807	0.092851	0.21232	0.101637	0.156178	-0.00383218	0.0528299	0.0883328	-0.108111	-0.0384162	-0.135036	0.105808	0.171328	0.257258	0.203676	0.233457	0.271005	-0.371425	-0.177717	-0.275721	-0.298897	0.215129	0.13854	-0.0986223	0.120785	0.205537	0.290581	0.116984	0.304711	0.0377989	0.148006	0.0166763	0.059432	-0.215868	-0.0534542	-0.605722	-0.305844	-0.407474	-0.0196741	0.0645861	0.00304474	-0.00220376
1367860_a_at	Mmp14	81707	matrix metallopeptidase 14 (membrane-inserted)	0.512683	0.224558	0.272147	0.448488	0.384754	0.441294	0.505738	0.352827	0.431673	0.295886	0.177685	0.291057	-0.187558	0.0609289	0.0848321	-0.131238	0.0443431	0.148416	0.078098	-0.377621	0.122683	-0.278906	-0.141891	0.231882	-0.451801	0.0909643	-0.307246	-0.333336	-0.310454	-0.170044	-0.046872	0.00494696	-0.147199	0.0922911	-0.0943216	-0.0562365	0.437754	0.544605	0.482836	0.199001	-0.267599	-0.11748	0.208421	0.249263	0.985155	0.221911
1367861_at	Evl	79115	Enah/Vasp-like	-0.371899	0.156301	0.0379465	-0.227212	-0.27614	0.286156	0.38069	-0.189119	-0.0853378	-0.497826	-0.160943	-0.124277	-0.139966	0.337282	0.28551	-0.448197	-0.105839	-0.316608	-0.189706	0.0074492	-0.0202809	-0.365029	0.091977	-0.0320756	0.0891731	-0.0814783	-0.096567	-0.128624	-0.0452516	-0.190409	0.437082	0.029342	0.0972107	-0.00446293	-0.249352	-0.192694	0.0894866	0.0968021	0.234147	0.297961	0.00922683	0.043231	0.468412	-0.169885	0.62319	0.533378
1367864_at	Pfkm	65152	phosphofructokinase, muscle	-0.139046	-0.071382	0.14885	0.0789284	0.0762201	0.0641426	-0.0942546	-0.164324	-0.154959	-0.215701	0.0779276	-0.0407598	-0.124549	-0.338219	-0.297058	0.308929	-0.172294	0.165551	-0.170951	-0.0191938	-0.172666	0.123142	-0.27572	-0.110644	-0.133675	-0.0394551	-0.00281121	-0.1223	-0.175493	-0.267294	0.0386476	-0.306368	-0.179963	-0.0469584	-0.0366261	-0.210229	-0.240889	-0.195969	-0.0320921	-0.0751634	0.0718797	-0.0393728	0.151347	-0.0108776	-0.0440962	0.100666
1367866_at	Fbln5	29158	fibulin 5	-0.796774	-0.0293859	-0.257483	-0.703276	-0.180723	-0.220899	-0.0988672	0.277391	0.157882	-0.293207	0.0757144	0.00163972	-0.458351	0.27963	-0.13695	-0.320035	-0.147439	-0.466056	-0.387552	-0.00366807	-0.352683	-0.737619	-0.0993316	-0.279186	0.446084	0.41043	0.361723	-0.3341	0.00507566	-0.0485231	0.00473745	0.0184435	-0.369412	-0.0518485	0.12555	0.160248	-0.202408	-0.23518	0.0851002	0.0351301	0.0192662	0.149645	-0.26205	-0.189487	-0.445315	0.258341
1367868_at	Adrm1	65138	adhesion regulating molecule 1	0.450922	0.0715672	-0.021169	0.251262	-0.0353918	0.0294001	-0.0516927	-0.0774881	-0.219488	0.16614	0.0520101	0.0706249	0.104597	-0.191378	0.0117374	-0.0217748	-0.187961	-0.173374	-0.000715168	0.0405178	0.00855228	0.0821364	-0.003331	-0.127206	0.00484313	-0.133911	-0.213689	0.294669	0.101029	0.192979	0.144185	-0.049033	-0.0248307	0.0716562	-0.103332	-0.00922985	0.324382	0.187247	-0.0400363	0.389109	-0.0294081	0.463257	0.454714	-0.0213514	0.188981	0.298137
1367869_at	Oxr1	117520	oxidation resistance 1	0.254594	-0.128928	-0.100842	0.0153883	-0.0414129	-0.150079	0.123538	0.144487	0.0934634	0.0326516	-0.0102681	-0.182377	-0.273615	-0.106309	-0.270124	-0.0733465	0.0437641	0.0356736	0.0548444	-0.0414079	0.20315	0.281709	0.073582	0.120489	-0.236679	-0.0262097	-0.0816447	-0.0567073	-0.183838	-0.0913704	-0.183701	-0.0828893	-0.109612	-0.179447	-0.15698	-0.194845	-0.322052	-0.125784	-0.163821	-0.190385	0.00685421	-0.0661996	-0.0385201	-0.137193	-0.0630368	-0.0410334
1367870_at	Glrx3	58815	glutaredoxin 3	0.139265	0.0278697	0.0476703	0.196681	0.078231	0.185251	0.00703151	-0.0171201	0.0167556	0.0537002	-0.0706684	-0.00984673	-0.0957615	0.00389252	-0.00956062	0.151685	0.0401606	0.00641369	0.128983	0.0567088	0.332294	-0.00429275	0.0453426	0.0279988	0.255586	0.131826	0.0380848	0.217176	-0.0155915	0.100148	0.224161	-0.062129	-0.0358663	0.298627	0.0258117	0.133125	0.552903	0.0507491	0.435877	0.574143	0.13698	0.263372	0.239648	0.0165398	0.313138	0.246052
1367879_at	Cdk5rap3	80278	CDK5 regulatory subunit associated protein 3	0.0499557	-0.0650568	0.149669	-0.0162842	-0.151318	-0.0971916	0.135658	0.00688327	-0.0995827	-0.184833	-0.224598	-0.0707034	0.0793047	-0.0525047	0.0172324	-0.0195558	-0.0425788	-0.130467	0.220459	0.104466	0.162304	0.0328742	-0.00645653	0.133593	-0.00212403	-0.089496	0.14032	0.176472	0.0271525	-0.0100981	0.146303	0.0778377	0.366677	0.199351	0.149771	0.167563	0.175848	-0.0620537	-0.135017	0.276859	-0.0460264	0.214192	0.042718	-0.0924541	0.127617	-0.10276
1367880_at	Lamb2	25473	laminin, beta 2	-0.161093	-0.215627	-0.253881	0.0319616	-0.0690114	0.0442525	-0.417495	-0.0474818	-0.189009	-0.0769756	0.146941	0.109332	0.0690602	0.028685	0.178304	-0.407417	-0.333381	-0.239035	0.0111168	0.0519364	-0.0985068	-0.000148675	-0.261606	-0.183261	-0.176367	-0.160576	-0.230719	-0.381307	-0.188978	-0.149731	-0.0528468	-0.0934331	-0.0879818	-0.211839	0.0475067	-0.0197954	-0.224564	-0.0596954	-0.119901	-0.296145	-0.220224	-0.114803	-0.0531629	-0.0548883	-0.191892	-0.0724289
1367881_at	Sirpa	25528	signal-regulatory protein alpha	0.216463	-0.154428	-0.145708	0.192181	-0.200018	-0.255926	0.0310541	-0.0666068	-0.0496859	-0.195942	0.0373203	-0.0568889	0.101818	0.162423	0.206906	-0.157641	-0.250163	-0.0381319	0.129475	0.162048	0.198943	0.360211	-0.0971303	0.0272513	-0.0802383	0.14132	0.0232347	-0.218971	0.106808	0.0919257	-0.00542463	-0.203327	-0.30882	-0.0809336	0.0534356	-0.064765	0.519194	0.00257155	0.448633	0.38851	0.123165	0.342655	0.317755	-0.118481	0.382934	0.374625
1367882_at	Map1a	25152	microtubule-associated protein 1A	-0.141725	0.0841384	-0.098362	-0.0797031	-0.0333581	-0.260597	-0.029915	-0.0197367	-0.0551068	0.181707	0.0631158	0.24423	0.321216	-0.0485185	0.0640672	-0.0860078	-0.203001	0.06051	-0.114241	0.00753345	-0.366605	-0.113676	0.00847826	0.0427481	-0.181284	0.138149	0.0697404	-0.0936572	0.135367	-0.0790779	-0.119476	0.0946831	0.116029	-0.00674874	-0.0281065	-0.167049	-0.238787	-0.0524677	-0.194217	-0.144463	0.219891	0.0349347	-0.0559636	0.198376	-0.172927	0.00714799
1367889_at	Camk1	171503	calcium/calmodulin-dependent protein kinase I	0.134702	0.0225044	0.0755655	0.147293	0.181461	0.143422	0.0713143	-0.015492	0.101379	0.0653681	0.124605	0.0583624	-0.132984	0.0515925	0.183018	-0.0719678	0.061919	0.00448013	0.209099	0.152052	0.250755	0.184191	0.0620072	0.000962034	-0.266044	-0.104666	-0.251516	-0.290247	-0.161424	-0.173742	-0.231833	-0.108196	-0.260348	-0.141429	0.0211277	0.0440174	0.0765089	0.167908	0.0848613	0.00955269	0.0611146	-0.0879155	-0.123044	-0.145331	-0.0861909	0.00185495
1367891_a_at	Casp2	64314	caspase 2	0.0970296	-0.273275	-0.101551	0.429695	-0.0901749	-0.035363	0.0677488	-0.00658838	-0.0867628	0.18538	-0.121584	-0.0881252	-0.136083	0.249256	-0.135184	-0.021204	0.00638424	0.0781487	0.112687	-0.114483	0.245161	0.133714	0.166052	-0.0475028	-0.110904	-0.0531805	0.0508827	0.0669703	-0.00268835	0.0679879	0.0427544	-0.118752	0.126319	-0.0425514	0.0780204	0.17813	0.146875	0.177115	0.285543	0.145309	0.0735374	-0.0686013	-0.140793	-0.0154369	0.130718	0.149408
1367893_a_at	Clcc1	170927	chloride channel CLIC-like 1	0.00802348	-0.0482442	-0.141367	0.179678	-0.0823047	0.0564859	-0.0296118	-0.201157	-0.00137199	0.114225	0.223338	0.230787	-0.101456	0.261249	0.118269	-0.00773963	0.115988	0.0423182	0.466729	0.25024	0.43456	0.0282966	-0.0465164	-0.0968023	-0.0435824	0.0502177	-0.0128216	-0.109169	-0.00864583	-0.0971411	-0.100414	0.0434507	-0.209416	-0.0501279	-0.0143106	-0.121628	0.0532291	0.102045	0.235562	-0.104612	-0.304809	-0.153859	0.208314	0.0998606	0.259356	0.0981858
1367894_at	Insig1	64194	insulin induced gene 1	0.861483	-0.622672	-0.386651	0.79107	-0.478161	0.032989	0.281278	-0.059796	0.405744	0.0799576	0.00776402	-0.321798	-0.0991473	0.252566	-0.0777756	-0.0761277	0.0549861	-0.206195	0.430704	-0.361986	0.266054	-0.305314	-0.183393	-0.591707	0.0041008	-0.0938239	-0.096513	-0.00186099	0.170506	0.0871448	0.236336	0.592441	0.359594	0.0323329	0.016746	0.346473	0.0571948	-0.279339	-0.112839	0.408651	-0.167862	0.0379729	0.328111	0.385911	0.225605	-0.087685
1367898_at	Bnip3l	140923	BCL2/adenovirus E1B interacting protein 3-like	0.580083	0.211068	0.366183	0.262519	0.00280525	0.0510876	0.160193	-0.0607505	0.00374327	0.0823519	0.0411493	-0.0134184	0.099321	-0.0795178	-0.0511115	0.238848	-0.0985176	-0.145246	-0.209791	-0.114657	-0.0243235	0.302552	-0.0555612	-0.192692	0.102078	-0.00602324	-0.102921	0.0955727	0.0331087	0.0415704	0.0337826	0.0329903	0.127861	-0.103717	-0.08882	-0.117616	-0.118208	-0.101597	0.0274052	-0.107351	-0.0344435	0.0424273	-0.0225345	-0.0519657	0.0648511	0.137512
1367899_at	F2r	25439	coagulation factor II (thrombin) receptor	-0.075183	0.131032	-0.121204	0.14028	-0.229166	0.0171442	0.193461	0.0965879	-0.0761119	-0.256248	-0.0685931	-0.226415	-0.241331	0.263615	-0.017099	-0.260083	-0.217218	-0.0533866	0.155212	-0.193262	0.228437	0.0536678	0.003761	0.000934414	-0.04547	0.0505813	-0.132538	-0.122639	-0.119935	-0.200691	0.384187	0.0516609	0.0557238	-0.325761	-0.0180402	0.0570818	0.568985	0.170944	0.602739	0.391503	-0.0492791	0.113181	0.200618	-0.0588311	0.497344	0.233707
1367900_at	Gyg1	81675	glycogenin 1	-0.361756	-0.0161561	-0.0486189	-0.0484857	0.0197608	-0.00939171	-0.0347133	0.0917267	-0.00111322	-0.141242	0.0873628	-0.00424256	-0.0563672	0.0662485	0.0247501	-0.0385953	0.0319166	-0.212216	0.0871951	0.127092	0.316861	-0.0089479	0.0774714	0.134364	0.391257	0.209425	0.208323	0.0771777	-0.00943778	0.0682565	0.420766	0.197978	0.225333	0.439111	0.227817	0.137601	0.496007	0.069099	0.331868	0.328651	-0.141166	0.20064	-0.0750392	-0.192693	0.306868	0.275715
1367903_at	Hmox2	79239	heme oxygenase 2	-0.0063417	-0.00387971	0.0993509	-0.00206692	0.109251	0.0394943	0.110568	-0.158312	-0.104645	0.177827	0.0904375	0.12591	-0.188393	-0.0562961	-0.0843652	0.0192159	0.00615581	0.0146783	0.177736	-0.0150147	0.144825	0.100401	-0.104074	-0.0983366	0.105558	-0.0614889	-0.0760651	-0.116125	-0.0211295	-0.111302	-0.042075	-0.183825	0.116833	0.0280203	-0.14426	-0.106399	-0.16711	-0.0678532	-0.115712	0.054035	0.144902	0.0172373	-0.0228564	-0.06345	-0.00702336	0.199063
1367904_at	Resp18	50561	regulated endocrine-specific protein 18	0.556965	0.287556	0.0681194	0.0594137	-0.483825	-0.50663	0.185725	-0.0856117	0.0837525	-0.0877006	0.0840457	0.1101	-0.198288	-0.068048	0.0107553	-0.481417	0.0843796	0.0102502	0.286418	0.164311	0.334452	0.316271	0.020593	0.232819	0.357309	0.519375	0.817022	-0.256472	0.15761	-0.46956	-0.0246012	0.729345	0.606183	-0.113592	-0.272283	0.203833	-0.850109	-0.784365	-0.498026	-0.978065	-0.375894	-0.519219	-0.488145	0.103346	-0.162896	0.114377
1367905_at	Enpp3	54410	ectonucleotide pyrophosphatase/phosphodiesterase 3	0.197563	-0.0688557	0.257816	-0.0191942	-0.0143852	0.132461	0.128687	0.0189323	0.0105565	0.133039	-0.213457	-0.154879	-0.0200553	0.179773	0.189561	0.343487	-0.0411454	-0.0108492	0.382058	-0.0979829	0.0861416	0.31045	0.0289136	0.0201355	-0.255874	0.0351016	-0.0708998	-0.163695	0.0472694	-0.184263	-0.431788	-0.0554112	-0.116506	-0.295292	0.100645	-0.00612344	-0.954863	-0.0805679	-0.375333	-0.804648	0.0160739	-0.311485	-0.426055	0.0829055	-0.334273	-0.554892
1367909_at	Dcxr	171408	dicarbonyl L-xylulose reductase	-0.0298696	0.099176	0.224038	-0.437865	0.0739444	0.0234166	0.204275	0.216442	0.0732474	0.0340703	-0.0396047	0.0100328	0.0508119	-0.273707	0.0695072	-0.204666	-0.0938722	-0.0226282	0.16986	-0.0352313	-0.155017	-0.0338248	0.116354	0.100309	-0.0467642	0.00475761	-0.00819615	-0.228721	-0.0426398	-0.0240561	-0.185806	0.0236518	-0.109902	-0.145578	-0.00904788	-0.020013	-0.350282	0.051022	-0.211159	-0.486336	-0.171069	-0.253515	-0.304851	-0.100276	-0.224503	-0.20561
1367910_at	Smad4	50554	SMAD family member 4	0.442301	0.016542	0.0793838	0.256128	0.19891	0.100857	0.183442	0.0447986	0.00749971	0.243717	0.0319454	0.0295515	-0.214101	0.395283	0.0675968	-0.199547	-0.182592	-0.101253	0.295675	0.0254504	0.0710286	0.28776	0.0890608	-0.0323006	-0.0639039	-0.0239021	0.0150455	-0.179814	-0.0879089	-0.0881838	-0.00209448	-0.00467034	0.0628131	-0.18346	-0.0289255	0.0374129	-0.0894653	-0.0844041	-0.125395	-0.0862859	-0.0526408	0.0547638	0.0764669	-0.0561752	0.184929	0.155226
1367912_at	Ltbp1	59107	latent transforming growth factor beta binding protein 1	-0.013162	-0.0141509	-0.0815175	-0.0839012	-0.307871	0.0531886	0.161373	0.204933	0.172681	-0.0433104	0.129098	-0.295979	-0.236393	0.0690713	-0.108014	-0.192502	-0.275261	-0.486373	0.460418	0.260568	0.430411	-0.235613	-0.11896	-0.190461	0.120128	0.144837	0.0792778	-0.159746	-0.00608844	-0.131676	-0.134055	-0.246342	-0.374481	-0.0635376	-0.0108214	-0.0471292	0.429523	-0.0279614	0.323589	1.01504	-0.10294	0.527348	0.0984056	-0.209009	0.0355789	0.454853
1367914_at	Emp3	81505	epithelial membrane protein 3	-0.319922	0.037482	0.0512	-0.0534716	-0.156525	-0.0398597	0.0525155	0.046883	0.159622	-0.523215	-0.224346	-0.207576	0.0721103	0.0660117	0.175561	-0.232593	-0.279109	-0.167501	-0.256437	0.0393801	-0.181164	-0.491739	-0.140718	-0.187206	0.0358754	-0.0315452	-0.0701446	-0.0865372	-0.0728811	0.0631587	0.121167	0.104881	-0.101434	-0.203224	-0.153183	-0.170679	0.372476	0.0148097	0.574843	0.697345	0.139207	0.577108	0.461496	-0.34684	0.611995	0.377311
1367916_at	Plcd1	24655	phospholipase C, delta 1	-0.331497	-0.202758	-0.26353	0.0594459	0.0315912	-0.0194928	0.14501	0.148272	-0.0257499	0.0971305	0.15485	-0.0609566	0.186205	-0.228587	-0.0110822	0.190916	-0.104935	0.12043	-0.167215	0.0449725	-0.298634	-0.00493177	0.0685929	-0.0370425	0.0344361	0.0400127	-0.0311364	0.0943944	0.0841628	0.00193813	-0.011624	-0.0858753	0.0158224	0.0767448	0.179275	0.0464808	-0.121407	-0.15571	-0.14323	-0.154432	-0.00967566	0.0659575	0.0706861	-0.0335153	0.483949	0.0851782
1367918_at	Fez1	81730	fasciculation and elongation protein zeta 1 (zygin I)	0.021979	-0.0629041	0.176834	0.0705259	-0.20684	-0.197648	0.324726	0.169622	-0.0341683	0.247488	0.126808	-0.00831353	0.00377021	-0.155174	0.0884062	-0.16373	-0.0384699	0.258581	-0.132149	-0.118119	-0.0196338	-0.41166	-0.32737	-0.343934	0.054909	-0.277403	-0.0580935	0.230139	0.124176	-0.0458674	0.259855	-0.073539	0.0281028	0.369773	0.227169	0.256865	0.0253854	0.136936	0.0290956	-0.0626766	0.118358	-0.0803986	-0.190063	0.0979315	-0.195601	0.0830447
1367919_at	Nup210	58958	nucleoporin 210	-0.15199	0.271484	0.147156	-0.220614	-0.00495511	-0.0699949	-0.0174067	0.0778989	0.069982	-0.159696	-0.12575	0.0798348	-0.0665101	0.152881	0.141052	0.267044	-0.0589951	0.196936	-0.217224	-0.181288	0.195936	-0.200903	-0.0663456	-0.228518	0.198447	0.134922	0.294756	0.32165	0.0865526	0.149745	0.351239	0.041696	0.12298	0.190084	-0.104864	-0.0884377	0.409137	0.20868	0.412587	0.748078	-0.0610595	0.258435	-0.0921573	0.0690185	0.37829	0.662297
1367920_at	S1pr2	29415	sphingosine-1-phosphate receptor 2	-0.809255	-0.0798988	-0.152314	-0.920557	-0.144583	0.126932	-0.121021	0.188469	0.388168	-0.273309	0.53274	0.322217	-0.574624	0.2546	-0.278165	0.149662	0.499505	0.12674	-0.028586	-0.0433274	-0.0260974	-0.208106	-0.0900875	0.0477478	-0.137113	-0.281236	-0.0791453	0.0315099	0.299899	0.205952	0.186482	0.389224	0.2733	0.0736067	-0.0701719	0.0545848	0.32938	0.0509206	0.320769	0.254072	0.152497	0.305438	0.28468	0.23043	0.239362	0.307187
1367921_at	Ilkap	64538	integrin-linked kinase-associated serine/threonine phosphatase	0.196699	0.0459888	0.11564	0.271217	0.046587	0.119386	0.145857	-0.00781896	-0.0157708	0.117629	-0.101775	-0.06126	-0.149883	-0.132061	0.00154249	-0.234703	0.0016962	-0.0961989	0.282597	0.197457	0.340464	-0.0813298	0.00993212	-0.158416	0.0935165	0.00311526	-0.00619555	-0.0712553	-0.074008	0.10314	0.0312129	0.0600496	-0.100233	-0.0131236	-0.0935361	-0.151749	-0.0415108	-0.101094	0.00452453	-0.0494614	-0.00325767	0.0519639	-0.0219849	-0.135936	0.0819438	-0.119333
1367929_at	Cd59	25407	CD59 molecule, complement regulatory protein	-0.374164	-0.14778	-0.117178	-0.038231	-0.0440337	0.0520737	-0.188236	0.0486733	0.0644285	-0.047519	0.0170241	0.0640914	-0.0283433	0.115205	-0.0034895	0.151863	0.0685532	-0.010158	-0.108453	-0.0140958	0.186094	-0.0280935	-0.0105244	0.0430149	-0.303712	-0.20655	-0.141187	0.0177943	-0.0394577	-0.147554	-0.275536	-0.09827	-0.0673632	-0.326744	-0.234882	-0.186276	-0.154436	0.235652	-0.159688	-0.0262695	-0.0867425	-0.030471	-0.263971	-0.0540073	-0.1675	-0.160855
1367932_at	Hmgcs1	29637	3-hydroxy-3-methylglutaryl-CoA synthase 1 (soluble)	0.485743	-0.0716677	-0.105465	0.268917	-0.383177	-0.419428	0.363691	0.425475	0.285658	0.302534	0.00617617	-0.143988	0.909463	-0.147282	0.152573	0.779652	-0.0280657	0.297079	0.281241	0.411032	0.447739	0.687769	0.0956303	-0.0887917	0.137422	0.312485	0.317655	0.221868	-0.0519291	0.355738	-0.235884	-0.0724542	0.210822	-0.451212	0.144468	-0.0649044	-0.0722232	-0.0483391	-0.124224	-0.262144	0.00111185	-0.181364	-0.250106	-0.0679532	0.0734955	-0.196636
1367933_at	Amd1	81640	adenosylmethionine decarboxylase 1	1.03649	-0.243307	0.0192244	1.42411	0.249087	0.296544	0.361885	-0.0947779	-0.115357	0.481599	-0.198829	-0.138421	0.689272	0.0113438	0.0827963	0.268498	0.0172943	0.0124344	0.87157	0.280702	0.480851	1.03175	0.246868	-0.020168	0.126152	-0.0195848	0.0251046	0.0577482	-0.148492	0.148391	0.399236	-0.171095	0.0429372	0.06238	0.0663948	-0.120031	0.422797	0.153876	0.0832343	0.629733	0.101819	0.323574	0.630195	0.231816	0.727615	0.483852
1367935_at	Smu1	117541	smu-1 suppressor of mec-8 and unc-52 homolog (C. elegans)	0.180464	0.0719644	0.0432077	0.142669	-0.0572217	-0.0840768	0.231471	0.0844342	0.119748	0.125293	-0.00563322	-0.00167542	-0.0452467	0.206906	0.197175	-0.0465287	0.0701562	0.0116282	0.284595	0.0229769	0.212904	-0.115018	0.0180689	-0.0810578	0.0793177	0.120321	0.0473305	-0.0835321	-0.116461	-0.061553	-0.0639314	-0.0107349	0.0509867	0.0739638	-0.0207644	-0.110815	-0.0908973	-0.1191	-0.0690425	-0.128427	-0.011792	-0.11484	-0.176435	-0.0421513	-0.0975937	-0.121473
1367936_at	Stk10	29398	serine/threonine kinase 10	-0.353356	0.101795	0.0473966	0.145909	-0.0442241	0.103412	0.168704	0.0101404	0.0487043	-0.135682	-0.112045	-0.120562	-0.264781	0.138081	0.0803873	-0.219124	0.117629	-0.125218	0.0765028	-0.0614252	0.314848	-0.255346	0.0986318	-0.0792095	0.0399474	-0.0187529	-0.18959	-0.136998	0.0107787	-0.0521212	0.152921	-0.057968	-0.0624921	-0.0519264	-0.0412001	-0.0506691	0.539235	0.0710668	0.502592	0.508943	0.0521442	0.425088	0.478873	-0.197443	0.586702	0.498983
1367937_at	Miox	252899	myo-inositol oxygenase	0.732332	-0.107983	-0.232816	0.972938	-0.301302	-0.288729	0.0208342	-0.576378	0.162932	0.961735	0.312202	0.153825	0.125516	-0.14985	0.0899938	0.11707	0.133358	0.132605	0.119773	-0.0267866	0.201143	0.446925	0.0783608	-0.129297	-0.419773	-0.111879	-0.184633	0.471311	0.501271	0.016358	0.551164	0.453631	0.632817	0.158999	0.177214	0.111081	0.256425	-0.300332	-0.147834	0.107451	-0.115378	0.392552	-0.132583	0.260316	0.0488926	0.26612
1367939_at	Rbp1	25056	retinol binding protein 1, cellular	-0.0190774	0.136121	0.0690101	0.16386	0.424424	-0.126024	0.092938	0.063434	0.0240419	-0.428378	-0.170423	-0.115291	-0.0199933	-0.312398	-0.126676	-0.0277695	-0.0671479	-0.255796	-0.327732	-0.0524483	-0.190879	0.0445371	-0.0714388	0.199503	0.336729	0.411954	0.184104	-0.858682	-0.536634	-0.343621	0.0853742	0.236688	-0.0580757	-0.51545	-0.407566	-0.708124	-0.656825	0.197656	-0.261837	-0.705129	-0.036554	-0.159991	-0.212316	-0.115735	-0.228889	0.0942011
1367940_at	Ackr3	84348	atypical chemokine receptor 3	-0.727622	-0.161326	-0.321826	-0.611301	-0.176033	-0.0478202	-0.265966	0.0611282	0.00264103	0.11011	0.329649	0.38182	-0.054879	0.24377	0.105631	-0.10638	0.198987	0.0768694	0.0203278	-0.0611788	-0.106836	-0.210995	-0.0912099	-0.39608	0.106693	0.37033	0.281891	-0.122075	-0.167312	0.130551	-0.230327	-0.153753	-0.143292	-0.0227722	0.17239	-0.0524785	0.256533	-0.105123	0.418145	0.494109	0.41496	0.623237	-0.0295194	-0.293908	-0.050414	0.366098
1367942_at	Acp5	25732	acid phosphatase 5, tartrate resistant	0.0320838	0.324466	0.0806508	-0.0951371	-0.298718	-0.0736307	0.203636	-0.0511657	-0.022433	-0.313193	-0.0537234	0.21844	-0.289181	0.0419286	-0.0502517	-0.24601	0.480549	0.0625897	0.0858304	0.264932	0.205728	-0.0188099	-0.155657	0.0287591	-0.210773	-0.249021	-0.427235	-0.124852	-0.145666	-0.247491	0.487864	0.256196	0.041995	0.23652	0.0377227	0.396805	0.0999181	-0.128539	0.417945	0.149888	-0.115521	0.132644	0.426901	0.24099	0.398989	0.0804109
1367943_at	Nfkbib	81525	nuclear factor of kappa light polypeptide gene enhancer in B-cells inhibitor, beta	0.436795	0.010755	0.0769526	0.364501	-0.0901116	0.165078	0.0584282	-0.018687	-0.109528	0.310094	-0.056802	-0.0334735	0.27097	-0.0640968	0.0450627	0.105084	-0.17509	-0.0677267	0.290372	0.173352	0.320197	0.387554	0.0633627	-0.0201082	0.223212	0.124979	0.0357981	0.178084	-0.0481861	-0.008408	0.0900757	0.0680286	0.107636	0.203397	0.0276426	0.0851656	0.0667344	0.244579	0.093875	0.10554	0.152859	0.272651	0.110536	-0.0216397	0.10457	0.142936
1367945_at	Atox1	84355	antioxidant 1 copper chaperone	-0.50567	0.121507	0.0430113	-0.719874	-0.0410794	-0.0822522	-0.434843	-0.187231	-0.112614	-0.400312	-0.119079	-0.151191	-0.134978	-0.177522	-0.0704027	-0.16186	-0.141826	-0.0595835	-0.201536	-0.101729	-0.0839073	-0.058165	-0.0861607	-0.108507	0.183734	0.0492912	0.118733	0.0267333	0.157604	-0.0272936	0.430972	0.462091	0.236853	-0.138852	-0.109192	-0.0544741	0.182795	0.309576	0.168411	-0.0823901	0.090815	-0.0790061	0.11275	0.110165	-0.0358121	0.0351814
1367946_at	Pdlim1	54133	PDZ and LIM domain 1	-0.0375008	0.00763008	0.0516479	0.18761	0.138421	0.434351	-0.0697241	-0.201603	0.141544	0.392197	0.202874	0.300611	-0.149283	-0.172228	-0.219777	0.0164982	-0.0418791	-0.187397	-0.160343	-0.0887865	-0.0397717	-0.232099	0.0911422	-0.149197	0.147511	0.20501	0.031347	0.21708	-0.0954506	0.140578	0.0169106	0.00198743	-0.000919827	0.0543708	-0.0254989	0.116216	0.643034	0.187615	0.388689	0.822927	0.222777	0.473479	0.13741	-0.0835003	0.168295	0.327626
1367948_a_at	Kdr	25589	kinase insert domain receptor	0.337709	0.0908099	0.151658	0.12699	-0.031273	0.020086	0.113061	0.0460071	0.0325894	0.05179	-0.0496349	-0.0435306	-0.239213	0.103021	-0.0559754	-0.127372	0.0285787	0.185997	0.113045	0.0343272	0.294529	-0.350804	-0.10767	-0.0128096	-0.185466	-0.0650952	-0.128915	-0.0835966	-0.103486	-0.0815156	-0.284018	-0.216669	-0.224233	-0.0860119	-0.0395078	-0.0308296	-0.519807	-0.202593	-0.438339	-0.535134	-0.217154	-0.362231	-0.154241	-0.0206938	-0.155876	-0.170485
1367950_at	Slc22a5	29726	solute carrier family 22 (organic cation/carnitine transporter), member 5	1.87678	-0.0160513	0.313162	1.91387	-0.0757866	0.0895773	0.926912	-0.00591114	0.0270362	1.44858	-0.16964	0.239889	0.643733	-0.205519	-0.0956902	0.717717	-0.0713911	0.011019	0.30548	-0.225199	-0.136381	1.00809	0.0522736	0.162249	0.176133	0.149115	-0.0738605	-0.214891	-0.0608403	0.107203	0.16588	-0.139972	0.283051	0.130684	0.014093	-0.049221	0.251014	0.138479	0.102292	0.651188	0.309986	0.361026	0.275554	-0.141798	0.105131	0.885332
1367952_at	Lrp2	29216	low density lipoprotein receptor-related protein 2	-0.125609	-0.0512387	-0.106135	0.0241373	-0.166625	0.179661	-0.227166	-0.144631	0.0786193	-0.187659	-0.0205365	0.0513607	-0.297628	0.15973	-0.163069	-0.0326381	0.0318997	0.0547851	-0.249177	-0.167716	-0.069953	-0.64931	-0.150674	-0.139563	-0.080345	0.120469	0.107207	0.035985	-0.0890604	0.0112061	-0.237498	-0.0302388	-0.307521	-0.389837	-0.104045	-0.275671	0.266963	-0.152436	-0.0238747	-0.334298	-0.0952617	-0.32639	-0.125474	0.171876	-0.0702904	0.331081
1367953_at	Tyro3	25232	TYRO3 protein tyrosine kinase	-0.235883	-0.191434	-0.195809	0.285877	0.0228071	0.012445	0.0803752	-0.0243418	-0.169806	0.164641	-0.0594016	-0.152654	-0.0119298	-0.110321	-0.0632186	0.213648	0.0358284	-0.127211	0.0165545	0.11039	0.171294	-0.111335	-0.0422573	-0.0356126	-0.0191134	0.0651201	0.0137769	-0.343627	-0.166317	-0.139448	-0.0369239	-0.173529	-0.195274	-0.0530994	0.0154585	-0.0507722	0.772721	0.167782	0.471511	0.363885	0.113391	0.210931	-0.282822	-0.242027	0.0143524	-0.227903
1367956_at	Ncdn	89791	neurochondrin	0.184059	0.0846478	0.234027	0.351249	0.0398931	0.197827	-0.110037	-0.0181397	0.124199	-0.042181	0.10968	-0.11665	-0.325065	0.0170576	-0.104348	-0.00492163	0.0406852	0.211024	0.211801	-0.0396732	0.139579	-0.309579	-0.326278	-0.268585	0.119416	-0.0321078	-0.0674564	0.110624	-0.130242	-0.0890376	-0.00465326	0.056046	-0.163649	0.309162	0.17025	0.183639	0.578723	0.23973	0.502573	0.784143	0.219538	0.527376	0.241189	0.0381169	0.17314	0.328343
1367957_at	Rgs3	54293	regulator of G-protein signaling 3	-0.215332	0.543978	0.137722	-0.918053	-0.546569	-0.287646	0.0972742	-0.171375	0.0885812	0.513039	0.407381	0.889978	-0.839274	-0.925285	-0.205117	-1.19641	0.056317	0.146944	-0.110433	0.672621	-0.0890736	-0.964088	-0.546805	0.348966	-0.189059	0.256856	0.298159	-1.34822	-0.473858	-0.913092	-0.0216656	0.641343	0.317362	-0.33001	-0.349533	-0.873968	-0.307018	0.0295496	0.354924	-0.94349	-0.323336	-0.354967	0.303137	0.142646	0.353612	0.213248
1367958_at	Abi1	79249	abl-interactor 1	0.0268772	-0.0625475	-0.0282763	-0.0974928	-0.0655447	-0.0145805	0.0717207	-0.0163493	-0.0125994	-0.0432628	-0.0111477	-0.0264733	-0.261286	-0.0185475	-0.145226	-0.213638	-0.0305892	-0.155964	0.147505	0.109046	0.168204	-0.103124	-0.088336	-0.0798924	0.152506	0.140332	0.140475	0.114142	0.0276847	0.0688937	0.0485573	-0.038491	-0.0153861	0.0507705	0.0431995	0.0495251	0.240655	0.0433574	0.0565479	0.171642	0.0691349	0.184665	0.0411635	-0.0757069	0.204483	0.0659075
1367959_a_at	Scn1b	29686	sodium channel, voltage-gated, type I, beta subunit	0.306061	-0.0937388	0.168571	0.0735467	-0.078936	0.186798	-0.0753696	-0.192307	-0.167927	0.129034	-0.114758	-0.183969	0.0665656	-0.0936281	-0.0936017	0.260434	-0.0744317	-0.0952015	0.049756	0.061289	-0.0705353	0.616471	-0.0614976	0.0192719	-0.0397846	-0.006437	-0.0499797	-0.541578	-0.292874	-0.351022	-0.390835	-0.207532	-0.218603	0.0149547	-0.0440285	-0.17077	-0.447842	-0.0498719	-0.408744	-0.381552	-0.16611	-0.101499	0.0852762	-0.0593041	-0.0214325	-0.0014082
1367960_at	Arl4a	29308	ADP-ribosylation factor-like 4A	0.140734	-0.0691523	-0.0736253	-0.143482	-0.130605	-0.0680186	-0.0820754	-0.210754	-0.221649	-0.0541392	-0.137291	-0.242716	-0.145477	-0.0400741	-0.149417	0.245215	0.0266383	-0.20051	0.150007	-0.18155	0.293971	-0.102908	-0.0610525	-0.222819	-0.140242	-0.0475021	0.0417403	0.137734	0.292705	0.0444461	0.172548	-0.112204	-0.0134028	-0.341102	-0.160003	-0.394775	-0.0349136	-0.245916	0.0819882	0.606499	0.15017	0.279858	0.0542797	0.129366	-0.18402	0.0470242
1367967_at	P3h1	114200	prolyl 3-hydroxylase 1	0.163182	0.0278228	0.0580085	0.0109118	0.00722987	-0.165088	0.116227	-0.109835	-0.1778	0.0232852	-0.00957255	0.00898131	-0.102543	-0.108129	-0.0738209	0.140109	-0.0489406	0.0330559	0.0568677	-0.0507113	0.14331	0.159312	-0.121387	-0.0485	-0.188726	-0.0272257	-0.0443577	-0.0166654	-0.117955	-0.0935931	0.141649	-0.0661606	0.0818926	0.0230865	0.0319616	0.0985643	0.167082	-0.158988	0.0314842	0.43102	0.0452107	0.0461988	0.195892	-0.00137461	0.234366	-0.0490814
1367973_at	Ccl2	24770	chemokine (C-C motif) ligand 2	-0.312753	0.285692	-0.0386916	-0.00585234	0.0927687	0.163076	-0.505376	-0.0112791	-0.438061	-0.254416	-0.43538	-0.332272	0.32166	1.08582	-0.0686459	-0.0745734	0.125758	-0.148848	-0.33737	-0.191171	-0.380953	-0.136116	0.124531	0.0569709	0.0732074	0.515405	0.382867	-0.047961	-0.070718	0.0145211	-0.16072	0.268487	-0.130693	-0.141918	-0.126335	0.00488018	1.71115	0.703593	2.00992	2.46459	1.6393	2.40704	3.02454	0.23952	2.70431	1.48203
1367975_at	Anxa3	25291	annexin A3	0.133181	0.104661	0.0964356	-0.0462653	-0.265759	-0.00143945	0.413637	0.303187	0.197051	-0.19582	-0.575499	-0.154003	0.103991	0.418653	0.399583	-0.007492	0.226082	0.671651	0.105156	0.173745	-0.187379	-0.248717	-0.124027	0.0400967	-0.145462	-0.294097	-0.255352	-0.0295814	-0.261655	-0.2962	-0.349087	-0.0116251	0.0919635	-0.0725375	-0.163948	-0.121893	0.0401673	4.00052e-05	0.0948633	0.0776686	-0.0416106	0.429197	0.350898	-0.395131	0.533688	0.614668
1367976_at	Tpp2	81815	tripeptidyl peptidase II	-0.00539433	-0.019241	0.037192	0.0278112	0.174515	0.0877557	-0.168118	-0.00163407	0.036533	-0.206724	0.0103619	-0.111486	-0.409733	0.0560038	-0.199599	-0.298725	0.197734	-0.179461	0.227399	-0.0855655	0.302099	-0.137349	0.142743	-0.0973796	-0.112949	-0.0127281	0.025982	0.15818	-0.0162786	-0.00936305	0.294489	0.0462834	0.190631	0.217356	-0.123477	0.0813466	0.331625	0.18408	0.142354	0.0533653	0.0283313	-0.0838235	-0.0980712	-0.122162	-0.0173504	-0.0550601
1367981_at	Rabep1	54190	rabaptin, RAB GTPase binding effector protein 1	0.333955	0.0567353	0.0586248	0.286543	-0.0694358	-0.0205955	0.124841	0.0495857	0.129005	0.154335	0.0611976	0.0859867	0.0371687	0.417969	-0.0140678	0.00994583	0.0772531	0.0759592	0.172905	0.181647	0.335591	-0.0925283	-0.109385	-0.0700963	0.0524086	0.0323397	0.105124	-0.144214	-0.134895	-0.140949	-0.0262309	0.0444215	0.142489	-0.0179345	-0.127871	-0.076659	-0.229531	-0.00442685	-0.0835028	-0.109283	-0.0527075	-0.024924	0.00400864	-0.0687572	-0.0218354	-0.190947
1367982_at	Alas1	65155	5'-aminolevulinate synthase 1	0.632237	-0.844398	-0.440687	0.537791	-0.0334952	0.268099	0.489518	-0.258287	0.234864	0.134086	-0.213821	-0.229981	0.136988	-0.393358	-0.502786	0.167303	-0.0914897	-0.3415	0.589953	-0.513987	-0.0319372	0.610385	-0.186095	-0.6367	0.682671	0.0116733	0.282443	1.21537	0.186178	0.333169	0.975942	0.512408	0.47844	0.757331	0.14838	0.450003	1.12511	0.593425	0.69533	0.620583	0.597715	0.570478	-0.240878	0.418497	0.103819	0.475937
1367984_at	Scaf1	56081	SR-related CTD-associated factor 1	-0.0927423	-0.175996	-0.0712598	0.258178	0.0796018	0.16857	-0.0618192	-0.00996586	0.0312201	0.122571	0.133859	0.107847	-0.00936352	-0.154557	-0.0596061	-0.409549	-0.181883	-0.0567907	-0.123436	0.108758	-0.157801	0.205806	-0.131672	-0.0406144	0.0173134	0.0648649	-0.0289714	0.219164	-0.00739565	0.10618	-0.105884	0.00861677	-0.0845214	-0.0893676	-0.373736	-0.15114	0.182326	-0.019812	0.00674783	0.161916	-0.153548	0.165884	0.130221	-0.118763	0.0271207	0.117712
1367985_at	Alas2	25748	5'-aminolevulinate synthase 2	-1.66544	-0.00989057	-0.278005	0.42583	0.0781918	0.297541	-0.567123	-0.147622	-0.0964124	-1.36002	0.348615	0.305528	-0.384643	-0.0585089	0.771785	-0.574619	-0.173414	-0.631585	-0.841377	-0.339854	-0.26797	-0.921808	0.095584	-0.636082	0.478498	0.258371	0.146819	-0.121061	0.254216	0.256169	-0.714857	-0.589886	-0.230066	0.313602	0.0195233	0.0149521	-0.270797	-0.0333365	-0.214484	-0.517066	0.237072	-0.42138	-0.0077467	-0.219389	-0.128817	-0.149913
1367986_at	Ptgfrn	29602	prostaglandin F2 receptor inhibitor	0.486552	0.1244	0.206653	0.467277	0.146254	0.320833	0.338674	0.356389	0.335008	0.235422	0.342756	0.330055	0.272511	0.320168	0.191175	0.251442	0.281375	-0.190422	0.495156	0.365576	0.381581	0.0618931	-0.0455712	0.0820779	0.267131	0.0658081	-0.0115287	-0.0985616	-0.187639	-0.119706	0.179277	0.0474591	-0.160738	0.245981	-0.0516458	-0.336399	0.521953	0.0227239	0.526881	0.296805	0.111692	0.465838	0.0612843	0.0648418	0.188832	0.471077
1367993_at	Clip1	65201	CAP-GLY domain containing linker protein 1	0.0511666	-0.0642044	0.0630462	0.241667	0.0475197	0.0647898	-0.0995753	-0.0779146	-0.081519	0.294548	-0.0282498	0.0956657	0.0257838	0.0202611	-0.259756	0.453362	0.0299404	0.200531	-0.00634898	-0.149855	0.241409	0.121361	-0.135147	-0.136334	0.213337	0.00129472	-0.00269913	0.2011	-0.196577	-0.0784088	0.131021	0.0548838	0.0971903	-0.0944671	-0.141516	-0.167212	0.357972	0.158787	0.29138	0.539078	0.140048	0.487805	0.0228857	-0.153309	0.0224595	0.170515
1367994_at	Dpyd	81656	dihydropyrimidine dehydrogenase	-0.232265	-0.18111	-0.2071	-0.464553	0.0697531	-0.101485	-0.238802	-0.0123343	0.109593	0.00258496	0.199761	0.150686	-0.380268	-0.144182	-0.276657	-0.172832	-0.0420698	0.00780531	0.0130584	-0.250555	0.156726	0.186971	0.0667411	0.0514182	-0.299403	-0.0936947	-0.161131	-0.327433	-0.199289	-0.247203	-0.238007	-0.223692	-0.121278	-0.306437	0.0299976	-0.297821	-0.676293	-0.183383	-0.427539	-0.558536	-0.0384325	-0.32596	-0.281632	-0.17917	-0.222677	-0.18116
1367996_a_at	Adgrl1	65096	adhesion G protein-coupled receptor L1	0.210146	-0.00618601	0.106867	-0.00613881	-0.0732877	0.0742389	-0.193163	-0.0148601	-0.264294	0.366264	0.333294	0.280492	-0.417071	-0.27696	-0.186673	-0.139692	0.0812662	0.14563	0.0436064	-0.00964076	-0.0905509	0.171281	-0.101774	0.0346395	-0.427679	0.0660429	-0.233059	-0.576638	-0.033952	-0.0800998	0.0826823	0.241453	-0.0743337	-0.0477629	0.0430166	-0.0296672	-0.127164	-0.143706	-0.0844403	-0.598727	-0.234665	-0.128968	-0.201881	0.0612872	-0.087186	-0.316707
1367997_at	Clpb	65041	ClpB homolog, mitochondrial AAA ATPase chaperonin	0.0973845	0.00463391	0.259225	0.252759	0.0940306	0.125996	0.123893	0.0567844	-0.00976795	0.067103	-0.00850669	-0.0601887	-0.0226031	-0.000834185	-0.0849974	0.255202	0.133258	-0.0324204	0.0410716	-0.0281046	0.10708	-0.16752	-0.0613233	-0.0878152	-0.00201222	0.109032	0.116854	-0.114159	-0.0618333	-0.113265	0.0849608	-0.00112213	0.117834	0.00855947	0.159309	0.0110349	0.163297	0.0325932	0.0995151	0.0768693	-0.0184824	0.0989814	0.034419	0.0613693	0.188421	0.12229
1367998_at	Slpi	84386	secretory leukocyte peptidase inhibitor	-2.65783	-0.541777	-0.618671	-1.16567	-1.03638	0.353838	0.200668	-0.532937	-1.72454	-0.907599	-0.21565	-1.43354	0.818802	2.50683	1.39215	-0.893748	-0.0472811	0.656041	-0.980748	-1.57244	-0.909847	-1.48644	0.0546209	0.513886	-0.405815	0.757893	0.38002	-2.19693	-2.76321	-0.129517	-0.0820564	-0.209365	0.127101	1.00656	0.716592	-0.276685	0.225319	1.44095	1.97457	1.41056	0.469437	-0.296289	0.808963	-1.05632	1.4422	-1.12291
1368002_at	Msh2	81709	mutS homolog 2	-0.31158	-0.0361111	-0.146104	-0.107045	-0.0380486	-0.147355	-0.219901	0.148379	-0.0534266	-0.197739	-0.119206	-0.023358	-0.326376	-0.0930583	-0.0592579	-0.169654	-0.212511	0.124495	-0.100284	0.00256584	0.310515	-0.231321	0.0198894	-0.0594194	0.559195	0.416609	0.438576	0.266523	0.101073	0.210802	0.335817	-0.000106412	0.155737	0.0486866	-0.127637	-0.204711	0.301012	0.0711821	0.232719	-0.0230588	-0.179902	-0.128436	0.170442	0.144279	0.413089	-0.0373566
1368003_at	Aldh1a2	116676	aldehyde dehydrogenase 1 family, member A2	-0.167955	0.0223413	-0.0370089	-0.188776	0.0797129	-0.161434	-0.18093	-0.198819	-0.26736	0.0965702	0.0654717	0.0478935	0.179671	-0.165085	-0.000194172	-0.204912	-0.339983	-0.298781	-0.233091	-0.0683598	-0.166304	-0.0840674	-0.0985755	0.171406	0.161179	-0.0267794	-0.0474856	0.0520562	-0.0749088	0.0185387	-0.108444	-0.0120953	-0.0630519	0.095284	-0.00268043	-0.00335849	-0.0970793	0.192511	0.0185379	0.122157	0.248476	0.223886	-0.0287481	0.162404	-0.124048	-0.0488812
1368004_at	Mrpl23	64360	mitochondrial ribosomal protein L23	0.344537	0.0828792	0.103992	0.180062	0.0284299	0.128019	0.0911217	0.0929852	0.0145849	0.219199	0.109142	0.155388	-0.0402958	-0.184784	0.0569648	0.0323199	-0.0712146	0.0897411	0.234211	0.0868993	0.237711	0.0101923	0.00373743	0.0274277	0.189592	0.251615	0.0977246	0.0131291	0.0454661	0.00801608	0.022555	0.147873	0.159729	0.131318	0.0949182	0.0216085	0.0831598	-0.0964446	0.102482	0.147841	-0.00598977	0.132912	-0.077392	-0.0275921	0.0183261	0.101467
1368006_at	Laptm5	89783	lysosomal protein transmembrane 5	-0.175029	0.0744019	-0.117707	0.0380639	-0.249735	0.00174632	0.231051	0.0152576	-0.0881415	-0.385701	-0.160657	-0.0486978	-0.0856491	0.334822	0.32697	-0.382877	-0.0311295	-0.114659	-0.122426	-0.01138	0.0196912	-0.465346	-0.0960028	-0.135977	-0.112075	-0.152915	-0.191731	-0.10988	0.0220721	0.0855618	0.521643	-0.153163	-0.151352	-0.15382	-0.13101	-0.191637	0.374309	0.0482319	0.410265	0.604645	0.0726655	0.533774	0.447502	-0.389894	0.966096	0.664253
1368009_at	Gne	114711	glucosamine (UDP-N-acetyl)-2-epimerase/N-acetylmannosamine kinase	0.351181	-0.152486	-0.0318734	0.144912	0.1137	0.0323394	0.0523685	-0.377511	-0.0677553	0.225968	0.142386	-0.1842	-0.290818	-0.197097	-0.140844	-0.389532	-0.172874	-0.254674	0.385296	-0.101171	-0.136498	0.187608	-0.0391198	0.243934	-0.323308	0.39139	0.0619405	-0.299517	0.0635904	-0.277272	-0.0608559	0.358832	0.698808	-0.153484	0.0609164	-0.0836282	-0.583284	0.146098	-0.13287	-1.1495	-0.134669	-0.324745	-0.152623	-0.073265	0.0477061	0.126098
1368010_at	Ptpn6	116689	protein tyrosine phosphatase, non-receptor type 6	-0.205368	-0.0313869	-0.0423444	-0.0551284	-0.0398244	-0.0484504	0.0821831	0.0636149	0.0305478	-0.283541	-0.0419394	-0.0400874	-0.0566384	0.154333	0.231947	-0.0423446	0.171651	0.111022	0.192632	0.152047	0.213597	-0.258751	0.00485377	-0.247895	-0.0513256	-0.00634575	-0.0859227	0.0286009	0.0496556	0.104754	0.0113601	0.0186891	0.018989	0.034742	0.048946	0.101431	0.163344	0.0283615	0.240965	0.361183	0.133482	0.179825	0.461854	-0.0529488	0.57766	0.245888
1368012_at	Tep1	64523	telomerase associated protein 1	0.0396054	-0.137299	-0.252962	0.114292	-0.215481	-0.131688	0.0740721	0.0445661	0.168185	0.143354	0.0362461	0.163584	0.0296689	0.0998371	0.176034	-0.112467	0.00713017	-0.277582	0.0519441	0.0072946	-0.0929893	0.086986	0.19347	0.128906	0.136644	0.249524	0.158706	-0.13336	-0.0667257	-0.103461	0.346929	-0.0336032	0.0752851	-0.11026	0.00123947	0.122667	0.272903	0.00484577	0.125145	0.0378698	-0.0216538	0.180784	0.359142	0.212219	0.440186	0.33234
1368020_at	Mvd	81726	mevalonate (diphospho) decarboxylase	0.411048	-0.0703822	-0.143784	0.603158	-0.405006	-0.231955	-0.0935517	0.107104	0.132081	-0.0965463	0.054804	0.0112844	0.906763	-0.298805	0.216738	0.735592	0.00896402	0.246824	0.575576	0.358185	0.320941	0.626536	0.134603	-0.0893996	0.618707	0.402903	0.331501	0.329446	-0.0344249	0.307494	0.00336561	-0.130321	0.319341	0.26924	0.276124	0.254177	0.226151	-0.00900027	-0.0873878	-0.101351	-0.0062224	-0.109501	0.126565	0.0131398	0.0177669	-0.148048
1368025_at	Ddit4	140942	DNA-damage-inducible transcript 4	-0.224796	-0.281983	0.0495769	-0.185048	-0.301192	0.0602296	-0.16789	-0.0502455	-0.107114	-0.511553	-0.0747699	-0.392113	-0.565729	-0.127359	-0.456918	0.0574091	0.0501498	-0.845195	0.24311	-0.460521	0.154532	-0.117783	-0.344193	-0.610555	0.083575	-0.398033	-0.29772	0.122427	0.164559	-0.012777	0.512547	-0.280748	0.192597	-0.253082	-0.292124	-0.0848146	0.389358	0.125436	0.110671	0.568081	0.0949877	-0.104923	0.231504	0.0140513	0.0218609	-0.0396088
1368032_at	Nolc1	64896	nucleolar and coiled-body phosphoprotein 1	0.51683	0.0475645	0.126148	0.620821	0.388759	0.300899	0.0260018	-0.182725	0.0523253	0.123518	-0.123896	-0.339561	0.306727	0.271809	0.0845576	0.057824	0.0670634	-0.103108	0.868302	0.217675	0.436537	0.410378	0.182413	0.008427	0.159103	-0.067291	-0.0366179	0.472152	0.145422	0.115816	0.207506	-0.240915	-0.323935	0.378487	-0.0226913	0.236286	0.841052	0.331044	0.424128	0.390755	0.141804	0.137642	0.402392	0.200823	0.512482	0.177653
1368035_a_at	Ptprf	360406	protein tyrosine phosphatase, receptor type, F	-0.788192	-0.133763	-0.262613	-0.479486	0.252574	-0.0321764	-0.418262	0.0877086	-0.182765	-0.328953	0.223564	0.060008	-0.357537	0.17647	0.044575	-0.570815	0.126416	-0.152951	-0.0581166	0.176782	-0.0838407	-0.877394	-0.230576	-0.0942674	-0.294378	0.507621	0.104991	-0.744445	-0.123685	-0.0193777	-0.45941	-0.25096	-0.458668	-0.41735	-0.198588	-0.140019	-0.568599	-0.385389	-0.346482	-0.792571	-0.530539	-0.498718	-0.654522	-0.307183	-0.495451	-0.283612
1368039_at	Synj2bp	64531	synaptojanin 2 binding protein	-0.0733656	0.198683	0.0165854	0.0475241	0.269685	0.0553191	-0.219532	0.0131233	-0.0901041	-0.221449	0.00866163	0.0511079	-0.542764	0.428644	-0.582082	-0.412782	-0.0510368	-0.266789	3.60328e-05	-0.163307	0.245257	0.0497078	-0.168258	-0.19971	-0.325524	-0.0943138	-0.00253203	-0.0926816	-0.0589452	-0.193683	0.00974369	0.164669	0.0704814	0.157632	0.0159068	-0.0335616	0.00752131	-0.245777	-0.262258	0.135303	-0.0576326	0.198399	0.325727	0.206165	0.225028	0.307801
1368046_at	Slc31a1	171135	solute carrier family 31 (copper transporter), member 1	-0.411206	-0.108936	-0.0826582	-0.161866	0.13419	0.0606181	-0.207961	0.0124745	0.0616591	-0.166387	0.116295	0.125978	-0.504798	0.799453	-0.012264	-0.221826	-0.0862662	-0.0418561	0.30176	-0.207511	0.318554	0.0924446	0.0100138	0.015146	-0.170423	-0.0438015	0.0881839	0.030054	-0.100049	-0.0185979	-0.101831	-0.0543736	0.0115088	0.0845994	0.0400616	0.12508	-0.0299435	0.00724802	-0.141715	-0.0832098	-0.0333251	-0.101512	0.050301	0.0278899	0.0549615	0.025661
1368047_at	Slc13a3	64846	solute carrier family 13 (sodium-dependent dicarboxylate transporter), member 3	-0.0244269	-0.357801	-0.266453	0.586625	-0.245919	0.116899	-0.0591609	-0.0643636	-0.283954	0.153055	0.114296	0.282146	0.614311	-0.222485	0.0874494	0.523713	0.194375	0.553358	-0.224599	-0.0698789	0.316257	0.197997	-0.194695	0.172727	-0.110208	0.28883	0.00564429	-0.21422	-0.0488152	-0.0849806	-0.505801	-0.16739	-0.412754	-0.107133	0.0604583	-0.173124	-0.550672	0.171552	-0.614791	-0.846875	-0.0317035	-0.205054	-0.794255	-0.327916	-0.511178	-0.224714
1368052_at	Tspan8	171048	tetraspanin 8	-0.196272	0.0276745	-0.0436743	-0.0394032	0.151075	0.0841071	0.0285247	-0.110451	0.0365663	-0.326755	-0.0879182	-0.196008	-0.299977	-0.291424	0.0719126	0.190608	0.24425	0.0708245	-0.179472	-0.087895	0.0642335	-0.284039	-0.0474404	-0.0706232	-0.122961	-0.263128	-0.131819	-0.164646	0.025445	0.0910447	-0.0327419	0.18545	-0.267289	-0.430223	-0.338013	-0.288535	-0.445906	-0.519425	-0.0817662	0.183274	-0.0221341	0.0595932	-0.349924	-0.238087	-0.290051	-0.194992
1368053_at	Pard3	81918	par-3 family cell polarity regulator	0.405083	0.129988	0.255559	0.407081	-0.101801	0.143153	0.0508148	-0.351426	-0.340936	0.152633	0.0533101	-0.136365	-0.435828	-0.0479686	-0.219927	0.168224	0.155413	-0.223882	-0.0185274	0.0177762	0.171243	0.382371	-0.0655243	-0.0514352	-0.128626	-0.166453	-0.033877	0.0444956	-0.089511	-0.205793	0.0210256	-0.129696	-0.396294	-0.0511585	-0.0451298	-0.00707182	0.103824	-0.0271153	-0.193458	-0.0203451	-0.069002	0.203748	-0.0606802	-0.0729349	-0.240099	0.128317
1368055_a_at	Lmna	60374	lamin A/C	0.0442725	-0.0182922	-0.0690254	0.0656778	-0.12474	0.045048	0.00242139	0.0462684	-0.0491942	-0.117292	-0.00146786	-0.00274977	-0.0136804	-0.163345	-0.0105832	0.114755	0.0118105	0.163616	-0.161321	-0.0438297	-0.0485375	-0.170684	-0.18817	-0.203734	0.350478	0.153683	0.0986282	0.286997	-0.044937	0.172976	0.249333	-0.107479	-0.0827695	0.270415	0.0528704	0.0837091	0.833178	0.123237	0.704933	0.69276	0.0132508	0.283924	0.0647538	0.0175289	0.185375	0.0181207
1368057_at	Abcd3	25270	ATP-binding cassette, subfamily D (ALD), member 3	0.306451	0.406652	0.194599	0.0639574	-0.10938	0.269481	0.122846	0.12548	0.0321391	-0.370853	-0.217326	-0.573772	-0.217035	-0.667341	0.0580987	0.149398	0.117187	0.0108168	-0.0845862	-0.0734178	0.269572	0.507102	0.333192	-0.0193851	0.0927051	0.0283612	0.0978102	-0.275654	0.0383193	0.425047	-0.0352507	0.0801509	0.0746977	0.0784494	0.0196299	-0.137798	-0.361374	0.146654	0.0758883	-0.284378	-0.00471775	-0.0271143	-0.0805939	0.0649707	-0.126584	-0.498701
1368058_at	Safb	64196	scaffold attachment factor B	0.0152395	0.0333377	0.040806	-0.0443533	0.125445	0.087702	-0.00417016	-0.0661603	-0.00960852	0.0289551	-0.0494555	-0.054227	0.089324	-0.159249	-0.0360766	-0.303596	0.00599534	-0.148174	0.0313146	0.0161739	-0.171752	-0.120239	0.154858	-0.195078	-0.00621333	-0.0903421	-0.161664	-0.024005	0.0451396	-0.0175506	-0.0821492	-0.0983575	-0.04646	-0.123839	0.0384077	0.0565545	-0.202474	-0.223374	-0.172109	-0.448862	-0.00414255	-0.326453	-0.244237	-0.070314	-0.0922038	-0.13798
1368059_at	Crym	117024	crystallin, mu	-2.30899	-0.0323816	0.109298	-2.1047	-0.279234	0.126003	-0.506739	-0.909612	-0.386012	-1.53827	-0.231773	-0.252055	-1.35271	-0.499895	-0.776003	-0.616106	-0.416707	0.0151827	-0.801801	-0.667696	-0.0794871	-1.22462	-0.0941259	-0.388262	-0.707592	-1.02827	-0.765995	0.20277	0.0101893	-0.159436	-1.31748	-0.110226	-0.545149	-0.332863	0.0509015	-0.0661023	-0.495361	-0.236675	-0.0905401	0.333969	0.819012	0.818024	-0.833687	-0.54007	-0.466062	-0.902124
1368061_at	Kcnh1	65198	potassium channel, voltage gated eag related subfamily H, member 1	-0.401899	-0.00164028	-0.0873157	-0.517947	-0.0186703	0.0605672	-0.192198	-0.256983	-0.0400465	-0.481581	-0.252207	-0.276786	-0.42546	-0.176964	-0.0507952	-0.149488	-0.0685707	0.136239	-0.213149	-0.0117478	-0.201709	-0.200129	0.036935	-0.158061	0.0385392	0.0653039	-0.0601174	0.0402456	-0.0342443	-0.0447817	-0.0250999	0.13899	-0.0321325	-0.1027	0.132995	0.0746118	-0.145195	0.0258342	-0.250912	-0.295131	-0.270295	-0.253858	-0.014662	0.296996	0.0719167	-0.461205
1368062_at	Ap3m1	171126	adaptor-related protein complex 3, mu 1 subunit	-0.175485	-0.014234	-0.145665	0.00399739	0.0380365	0.014404	-0.0838845	-0.004348	0.0528806	-0.116701	0.0641489	0.0871528	-0.0844967	-0.00663814	0.117832	-0.0260937	-0.0339574	-0.00898019	-0.0720428	-0.11343	0.0709462	-0.169368	-0.0151232	-0.110099	0.242032	0.0934132	0.130022	0.135593	-0.0201145	0.0377641	0.274652	0.0995596	0.220564	0.0513951	0.00877376	-0.0436194	0.379699	0.0308809	0.236513	0.352259	-0.047439	0.0913575	0.0532719	0.0126833	0.0732157	0.117454
1368064_a_at	Ddc	24311	dopa decarboxylase (aromatic L-amino acid decarboxylase)	-0.768673	0.162158	0.214382	-0.558114	0.00103782	0.129673	-0.0868499	0.0544042	0.101618	-0.251092	0.323252	0.175444	0.255966	0.0121295	0.0422996	0.433631	0.324149	0.116762	0.217191	-0.0357282	0.05616	-0.0892909	0.0372172	0.0253554	0.39887	0.334966	0.490645	0.388942	0.415673	0.250967	0.314887	0.155308	0.289453	-0.0367542	0.164924	-0.0724375	-0.389657	0.0311444	-0.0371687	-0.562754	0.0679506	-0.191505	-0.603602	0.0496512	-0.435482	-0.294396
1368065_at	Gipc1	83823	GIPC PDZ domain containing family, member 1	-0.0538212	-0.0369974	-0.0648598	0.0419402	0.0383247	0.127232	0.0212552	-0.102531	0.024809	-0.0848833	-0.0917643	0.304373	-0.20267	0.0166673	-0.165752	-0.176258	-0.0481441	-0.147322	-0.070033	0.0183267	0.0123928	-0.28175	0.155795	-0.0464933	-0.0215149	-0.0143472	-0.174083	-0.0456104	-0.166173	-0.0715524	-0.168991	-0.045084	0.0281225	0.190509	0.239149	0.0665945	0.112975	-0.260395	0.171828	0.123898	-0.0520685	0.177089	0.069426	-0.00546269	0.330709	0.228758
1368067_at	Zfp148	58820	zinc finger protein 148	0.453938	0.217855	0.370594	0.177528	0.143701	0.152118	0.3085	0.0513953	0.204232	0.137188	0.174127	0.0671882	-0.313963	0.1186	-0.119166	-0.223859	-0.138041	-0.173176	0.0850815	-0.0533601	0.144585	0.104365	-0.0144183	-0.0312533	-0.0468977	-0.00755136	-0.0110513	-0.041381	-0.0453104	-0.0581472	0.223976	0.0687777	0.107431	0.18485	0.00829719	0.149473	0.174863	0.0916299	0.170341	0.0208713	0.110408	0.0386683	-0.0170033	-0.0704826	0.0356278	0.0591417
1368070_at	Stx8	59074	syntaxin 8	-0.0715528	-0.00448563	-0.0163395	-0.234779	-0.06974	-0.0632339	-0.0903794	-0.119032	-0.00303799	-0.082581	-0.0107799	0.0498954	-0.185011	-0.182128	-0.0567403	0.0285155	0.053465	0.0576036	0.075183	0.0557575	-0.0145371	-0.107002	0.0441331	-0.0287071	0.108421	0.0797467	0.0222456	-0.076638	-0.00744763	0.00236627	-0.122573	0.0347995	0.00941956	-0.0381718	0.0375372	0.111989	-0.0880348	-0.163059	-0.114909	-0.0782292	-0.0917077	-0.0702192	-0.00711379	0.112077	0.0149501	0.00360409
1368073_at	Irf1	24508	interferon regulatory factor 1	0.190598	-0.0152386	0.104428	0.2712	-0.0725696	0.256732	0.240379	0.0509889	-0.305813	-0.0605094	-0.102017	0.0680143	0.128351	0.556256	0.496429	-0.169004	-0.20447	0.205141	0.0598506	0.393781	0.175495	0.415093	0.00846248	0.339425	0.0217285	0.424199	-0.108568	-0.104481	-0.41528	-0.0339788	0.0605977	0.0808643	-0.0253133	-0.22448	-0.189605	-0.104607	-0.0923241	0.00126362	0.000553866	-0.153405	0.284806	0.110629	0.573028	-0.36392	0.513119	0.0732618
1368074_at	Gale	114860	UDP-galactose-4-epimerase	0.483816	-0.00634523	0.0184065	0.898211	-0.0540877	0.142651	0.18487	0.280116	0.224051	0.251605	0.183502	0.202152	0.0604847	0.209781	0.0487052	0.330113	-0.016656	0.377935	0.0797069	-0.0464268	0.22507	-0.275013	0.104565	-0.203557	0.279825	0.192363	0.138644	0.195493	-0.0984424	0.192715	0.433861	0.00135959	0.220099	0.30609	0.0890753	0.151387	0.336214	0.12974	0.104395	0.311791	-0.170432	-0.121005	-0.0699929	-0.0992049	-0.0552028	0.0779313
1368075_at	Lipa	25055	lipase A, lysosomal acid, cholesterol esterase	0.655456	-0.0877465	-0.0962958	0.77509	0.0616379	0.225549	0.428079	-0.0872459	0.0847961	0.427506	-0.0989252	0.0494327	0.119566	0.246474	0.186921	0.135513	0.135229	0.0510457	0.676484	0.294581	0.445254	0.35408	0.0554902	0.0237965	-0.0206141	0.0137688	0.0138857	-0.035773	0.00596564	-0.00859597	0.0284202	-0.0528189	-0.00232634	0.183722	0.196806	-0.0585669	0.271772	0.35959	0.347899	0.0550893	0.0517387	0.0885675	0.117637	0.0633668	-0.0253542	0.357503
1368078_at	Esm1	64536	endothelial cell-specific molecule 1	1.8664	0.0494336	-0.135248	1.31831	-0.0109506	0.00203804	-0.122158	-0.0931466	-0.144981	0.0539322	0.0700156	-0.198684	1.33246	0.737598	0.116087	0.490229	-0.338276	-0.598782	1.0474	0.0951706	0.146602	2.6079	0.0235873	-0.0544861	-0.164905	-0.0953335	-0.251553	0.393849	0.0392917	-0.224631	-0.0426056	0.243844	0.304323	-0.208056	0.089387	0.418549	0.335458	0.0885485	0.444507	0.182385	-0.239246	0.373007	0.392782	0.119551	0.10268	-0.0191102
1368082_at	Slc4a2	24780	solute carrier family 4 (anion exchanger), member 2	0.190408	0.0821277	0.0502867	0.0446036	0.0374851	0.0754349	-0.00234932	-0.160761	-0.108346	0.0840627	0.130956	0.178526	-0.0765196	0.0389912	0.0959349	-0.0747843	0.0139215	0.0473569	0.176467	0.0938429	0.183939	0.00684507	0.0155637	-0.0664151	-0.0748923	0.0204065	-0.0079074	-0.0960713	-0.0353843	-0.10561	-0.00927456	-0.034964	-0.132268	0.248661	0.010833	0.0725972	0.127631	-0.0538397	0.0303599	-0.0691292	-0.104207	0.133223	-0.0392485	-0.145086	0.0317815	0.0342759
1368085_at	Gchfr	171128	GTP cyclohydrolase I feedback regulator	-0.279085	0.0220211	-0.105547	-0.462492	0.0957387	-0.0226488	-0.0685349	0.123532	-0.0130235	-0.117594	0.036302	0.0503194	-0.251351	-0.180547	0.0143151	-0.504057	-0.0518386	-0.00013647	-0.0288055	-0.186939	-0.0751419	-0.131264	-0.0801957	-0.0152503	-0.134282	0.10921	-0.0804503	-0.369355	0.00106095	-0.11162	-0.152983	-0.0514361	-0.0388931	-0.144061	0.0414291	-0.133405	-0.485584	-0.18003	-0.3956	-0.378095	-0.184011	-0.222514	-0.268038	-0.0862009	-0.237251	-0.358179
1368087_a_at	Ptpn21	171070	protein tyrosine phosphatase, non-receptor type 21	0.390248	0.138262	0.124597	0.333583	0.0530448	0.178242	0.0181161	0.0689001	0.0751294	0.167232	-0.0143351	-0.0686644	0.0327319	0.0442513	-0.0150258	-0.0238937	-0.130538	-0.00921583	0.176839	0.101123	-0.0191983	0.613406	0.170098	0.141631	-0.107384	0.036694	-0.176709	0.129805	-0.0619318	0.0621089	0.0832341	-0.00706761	-0.0757544	-0.0112463	0.0554535	0.0275667	0.273091	0.0541548	0.0329506	0.214815	0.0685424	0.240756	0.0767056	-0.119785	0.0686555	-0.0101738
1368091_at	Oplah	116684	5-oxoprolinase (ATP-hydrolysing)	0.00127695	-0.172349	0.0991649	-0.165201	0.00757141	0.113656	0.199533	-0.0268011	-0.0180095	0.319907	0.103989	0.098095	-0.367969	-0.108278	-0.0236463	-0.0371152	-0.207621	0.0303871	-0.0629079	0.123901	0.0941148	0.385821	-0.0781546	0.0729938	-0.0811987	0.0883332	-0.139303	0.0636695	-0.241579	-0.0533629	-0.0908992	-0.12297	-0.214604	0.0612931	0.0484551	0.163466	0.0909868	0.0971913	-0.0164421	0.0736434	-0.0297048	0.00385943	-0.024097	0.0176833	-0.0120282	0.0769487
1368095_at	Ak3	26956	adenylate kinase 3	0.00866752	-0.189298	-0.141	0.240947	0.216968	0.1159	0.0580457	0.0337161	-0.0312067	0.2547	-0.00116911	0.0826688	-0.102301	-0.0502852	-0.0610912	0.335961	0.0334876	0.0497191	0.171507	0.0317464	0.409582	0.508144	-0.0585973	-0.0211849	0.411492	0.274994	0.214095	0.316524	0.11166	0.190552	0.0447763	-0.043835	0.0921577	0.234287	-0.0801115	-0.0909791	-0.0993237	-0.0736977	-0.182005	0.373738	0.069178	0.159706	0.0452175	-0.0240609	0.188841	0.116434
1368096_at	Rab29	171122	RAB29, member RAS oncogene family	0.207044	-0.0413436	-0.0513783	0.0285849	0.0416261	0.100079	0.0542853	-0.131333	0.0103832	0.201351	-0.0137096	0.0275188	-0.0785171	0.0119118	0.0761073	-0.243665	-0.115993	-0.0912884	-0.112384	-0.131577	-0.14166	0.112571	-0.151041	-0.0272343	-0.0440884	0.0916895	-0.00767044	-0.107971	0.0032801	-0.149574	0.0321679	-0.038599	0.0752906	-0.268336	0.0265235	-0.228782	-0.279409	-0.192968	-0.202438	-0.339469	-0.151998	-0.221392	-0.0621745	0.214061	0.0218146	-0.104626
1368102_at	Hsd11b2	25117	hydroxysteroid 11-beta dehydrogenase 2	-1.06997	-0.153663	-0.0755664	-0.974813	0.0196544	-0.0668732	-0.00403724	0.0946591	0.0491007	-0.0779667	0.193667	0.0910375	-0.279779	0.0736448	-0.0783385	0.00208098	0.306073	0.0291043	0.213731	0.217106	0.0474964	-0.048871	-0.0383766	0.394361	-0.240303	0.38782	-0.0698149	-0.849583	-0.0670077	-0.207662	-0.964333	-0.180693	-0.542346	-0.233606	0.117711	-0.0280623	-0.930864	-0.195723	-0.522529	-1.62645	-0.221627	-0.863456	-0.538819	-0.00382566	-0.406651	-0.635579
1368105_at	Tspan2	64521	tetraspanin 2	-0.235934	-0.0264984	-0.121985	-0.21153	-0.0478856	-0.0852469	0.028492	-0.000428788	0.0568794	-0.18132	-0.0410283	-0.146795	0.220921	-0.199965	0.124522	0.057182	0.0257425	0.175619	-0.073315	0.263332	-0.0447175	-0.0602374	0.00280022	0.355585	0.0866891	0.113447	-0.0647583	0.0139285	0.041063	0.176819	0.0939561	0.0682848	-0.0450521	-0.134939	-0.111101	-0.108314	-0.229947	-0.025385	0.011145	-0.203679	0.0460577	-0.191292	0.0321833	-0.104191	-0.168328	-0.0194851
1368106_at	Plk2	83722	polo-like kinase 2	0.292509	0.183387	0.0409406	0.126013	0.0498132	-0.254513	-0.221252	-0.388092	-0.112294	0.184683	0.283875	0.226039	0.312416	-0.0793845	0.0877384	0.105003	-0.0501061	0.0882961	0.16994	0.285555	0.0247771	-0.149421	-0.343456	-0.0577824	-0.348104	-0.207654	-0.421143	0.0678812	0.122279	-0.12966	-0.139566	-0.0381194	-0.337004	-0.205531	-0.0456414	-0.11561	-0.919842	-0.433169	-0.790344	-0.473037	0.0686989	-0.13536	-0.0013161	0.0174319	0.184092	-0.0236667
1368109_at	St3gal5	83505	ST3 beta-galactoside alpha-2,3-sialyltransferase 5	0.205129	0.0386507	0.0928861	0.137042	-0.07488	0.0446386	0.0454399	0.061068	0.110241	0.0614771	-0.0517372	0.0350609	-0.195907	-0.0303576	0.271055	0.151855	0.297048	0.146688	-0.232046	-0.190168	-0.0105216	0.0063682	-0.143052	-0.0806465	-0.0460188	0.093149	-0.0910155	-0.0476257	-0.309764	-0.15454	0.116263	-0.142332	-0.308327	0.0655123	0.0690916	0.0301906	0.503245	0.0734657	0.376762	0.382979	0.0404589	0.464859	0.317852	-0.0177104	0.320202	0.433998
1368111_at	Abtb2	171440	ankyrin repeat and BTB (POZ) domain containing 2	-0.14259	-0.235831	0.0144243	0.151249	-0.00909115	-0.0537905	0.14663	-0.277628	0.0861033	0.306981	0.348855	0.0653572	-0.13877	-0.137783	0.125737	-0.103588	0.0242639	-0.168069	0.0890061	0.00217206	0.128776	-0.181759	-0.111937	-0.267667	-0.274162	-0.262381	-0.057037	-0.135163	0.015849	0.0589916	-0.0572526	0.204195	0.186068	0.169586	0.119838	0.201313	-0.0755331	0.187152	-0.0860517	-0.549141	0.214099	-0.300148	0.0241654	0.336064	0.246033	-0.0552651
1368115_at	Cldn3	65130	claudin 3	-0.0903471	-0.0508294	-0.0572749	-0.352131	-0.19679	0.148096	-0.311707	-0.20143	-0.226335	-0.134846	-0.218381	-0.242889	0.00214591	-0.129791	0.0920833	-0.0138048	-0.176468	-0.197921	0.0395764	-0.305577	-0.0202319	0.0189186	-0.0775138	-0.32797	0.203243	0.0790623	0.0364708	0.0515444	0.172477	0.0510979	0.047042	-0.00589417	-0.0474458	-0.148829	-0.0532603	-0.0316507	-0.270867	-0.287025	-0.153518	0.0297731	-0.250432	-0.284736	-0.105401	0.0024232	-0.170112	-0.165702
1368116_a_at	Rps6kb1	83840	ribosomal protein S6 kinase, polypeptide 1	0.194381	-0.0598248	-0.134973	0.204431	0.0785335	0.0634958	0.220468	0.0395183	0.0557953	0.221426	0.120743	-0.0447969	-0.0797052	0.479483	-0.0827016	-0.186974	-0.132759	-0.252683	0.497334	0.0808379	0.421572	0.374206	-0.0700955	-0.0907325	-0.0628141	-0.146557	-0.0132923	-0.00783024	-0.0216517	0.0159167	0.0406702	-0.21309	0.0204904	0.123051	0.107948	0.178171	0.165595	0.0335796	2.5365e-05	0.208016	0.121363	0.102078	-0.016525	-0.0341999	0.0867826	0.218799
1368117_at	Gphn	64845	gephyrin	-0.13674	-0.107056	-0.00732011	-0.243879	-0.00898777	-0.0553578	-0.162998	0.0204958	-0.0938957	0.0156239	0.165631	0.0274153	-0.0729644	0.14107	-0.0471349	-0.155686	-0.0672963	-0.0546044	0.0172284	-0.0499912	0.115495	0.0507336	-0.0121395	0.13896	0.182901	0.164178	0.0930454	0.0017418	0.0507903	-0.0225227	-0.119403	-0.0051607	0.0127191	-0.0419663	-0.0306854	-0.0713602	-0.237667	0.0124466	-0.251203	-0.31313	-0.0777803	-0.083116	0.041424	0.0150822	0.058864	0.00735536
1368118_at	Bcl10	83477	B-cell CLL/lymphoma 10	0.0138227	0.0119833	-0.0789995	0.0621515	0.0738836	-0.0814093	-0.0307244	-0.0413051	-0.0113832	0.071915	0.10592	0.043521	-0.0234241	0.303875	0.00897951	0.509716	0.157715	0.169935	0.0569792	-0.0280144	0.110267	-0.0776253	-0.158462	-0.18038	-0.198742	-0.205189	-0.0803694	-0.0724437	0.00121105	0.12096	0.0472128	0.0662438	0.0413728	0.0963258	0.0232115	0.119644	0.0556788	-0.144613	0.142436	0.15987	0.239529	0.238593	0.173771	0.0893061	0.274055	0.143704
1368121_at	Akr7a3	26760	aldo-keto reductase family 7, member A3 (aflatoxin aldehyde reductase)	-0.776213	0.032787	0.256441	-0.579142	0.116709	0.1338	-0.00792853	-0.296814	0.0317793	-0.278169	-0.391754	0.124979	0.982843	-0.650896	-0.296709	1.63906	-0.0310637	-0.152937	-0.320272	0.34737	0.186252	0.921074	-0.0669278	-0.0671684	3.21424	0.845189	2.51489	3.27133	0.735554	2.20816	3.02755	0.634036	2.33408	3.50271	0.661654	1.97362	1.36339	0.372367	1.21358	2.16107	1.37968	1.85675	0.668077	-0.158566	0.512758	1.03871
1368122_at	Rnf103	84508	ring finger protein 103	-0.313733	-0.109862	-0.119061	-0.405116	0.0183437	-0.216433	-0.162894	0.00629488	0.0684457	-0.267329	0.0267463	-0.0984583	-0.438139	-0.0724709	-0.280335	-0.331853	0.0771215	0.0862454	-0.19837	-0.0233749	0.00157666	-0.290661	-0.0310719	-0.0699733	-0.160843	-0.15243	-0.0539371	-0.0884929	-0.0257762	-0.02675	-0.202743	-0.0694404	-0.113083	-0.192639	-0.0324056	-0.0522442	-0.186155	-0.130246	-0.215635	-0.267139	-0.14782	-0.205954	-0.219705	-0.023973	-0.205682	-0.0371481
1368123_at	Igf1r	25718	insulin-like growth factor 1 receptor	-0.224257	0.130075	-0.0394325	-0.203071	0.090299	-0.108408	-0.160165	-0.00118691	-0.0904092	0.0744967	0.00572077	0.0066298	0.239969	-0.0332556	0.279852	0.0877253	-0.0439734	0.157835	0.137733	0.325229	-0.0775831	-0.0444506	0.12825	0.199148	-0.177992	-0.0733994	-0.150127	-0.161634	0.0561101	0.0148619	-0.134544	0.15363	0.0133484	-0.168623	-0.0048942	0.0592026	-0.02234	0.0533379	-0.108266	-0.125372	0.00419123	-0.186837	-0.0236445	0.311526	-0.212266	-0.192931
1368124_at	Dusp5	171109	dual specificity phosphatase 5	0.288931	0.108513	0.0816464	-0.183445	-0.073794	-0.264257	-0.0682552	0.0190815	-0.114781	-0.112201	-0.0761513	-0.0660172	-0.0174459	-0.108341	0.071767	-0.127111	0.0405777	0.495946	0.0487692	0.0477757	-0.0595148	0.224812	0.0104583	0.185803	-0.254164	-0.0417558	0.102951	-0.062888	-0.045187	0.0259213	0.00708564	0.185105	0.125465	-0.0564426	0.0251414	-0.0141151	-0.536637	-0.179077	-0.0284007	-0.392752	-0.070898	-0.151774	0.299266	-0.131196	0.097126	-0.0361246
1368126_at	Aacs	65984	acetoacetyl-CoA synthetase	1.3551	-0.24363	-0.109513	1.6007	0.236737	-0.199139	0.506585	0.312374	0.494498	0.558271	0.115345	0.121526	1.40004	-0.23735	0.360574	0.9104	0.272039	0.219357	0.710139	0.224191	0.0158668	1.26141	0.28658	0.117205	-0.0525401	0.173474	-0.0984021	0.227632	0.103248	0.319872	-0.65816	-0.243776	-0.385784	-0.0504459	0.218269	0.187488	-0.00677003	0.113533	-0.0836897	-0.271246	0.319839	-0.187029	-0.19664	-0.408924	-0.0698522	-0.150661
1368127_at	Neu2	29204	sialidase 2	1.00991	0.113906	0.188752	1.13665	0.263732	0.2203	0.296676	-0.0512301	0.100277	0.475219	-0.405821	-0.139089	0.405867	0.0428813	0.221677	0.256917	0.00449026	0.197177	0.505576	0.169415	0.301198	0.51846	0.0409136	0.131766	0.819312	0.310963	0.735446	0.324361	-0.0906049	0.0725802	0.874057	0.195492	0.853402	1.0003	0.397988	0.206366	0.183041	0.0751889	0.0172791	0.171804	0.126672	0.129816	3.45406e-05	0.249708	0.134434	0.570109
1368128_at	Pla2g2a	29692	phospholipase A2, group IIA (platelets, synovial fluid)	0.0264371	-0.0584844	0.0360044	0.208463	0.0332942	-0.184119	-0.00173538	-0.0340554	0.164446	-0.191156	-0.00680891	-0.087161	0.103479	-1.20432	-0.550258	-0.903162	0.19676	0.471386	-0.0130739	0.315203	1.36355	-0.901321	-0.159654	-0.213602	-0.207184	-0.412864	-0.194319	-0.256456	-0.263674	-0.497077	0.363224	-0.222816	0.140006	-0.176268	0.149428	0.6204	-0.0731383	0.104971	0.0458279	-0.161483	0.194981	-0.0624586	0.0145569	-0.170133	0.0753337	-0.802622
1368132_at	Tob1	170842	transducer of ErbB-2.1	-0.407071	-0.143814	-0.161123	-0.343497	-0.00202318	-0.103953	-0.301396	0.194398	-0.236387	-0.237918	0.0108387	-0.0865603	-0.13373	-0.0152461	0.0786953	-0.0139413	-0.0314868	0.164612	0.159599	-0.296876	0.0727358	0.254528	0.107019	0.32152	-0.271301	0.00628843	-0.152512	-0.149627	-0.250088	-0.135554	0.0943518	0.0986025	0.0206553	-0.204791	-0.380361	-0.238144	0.309743	0.117057	0.302895	0.346049	0.198913	0.185725	0.287917	0.183925	0.0364565	-0.110809
1368133_at	Mpdz	29365	multiple PDZ domain protein	0.244174	-0.232155	-0.136048	0.617016	-0.00653535	0.0241896	0.130847	0.0494014	0.223037	-0.0531237	-0.0363033	-0.0197391	0.0993405	0.169158	0.148454	0.273022	0.403785	0.312741	0.360802	0.0965536	0.603474	0.118035	-0.00718732	-0.0235652	0.384247	0.197311	0.315508	-0.0212836	-0.27752	0.0729658	-0.0716598	-0.241862	-0.183871	-0.159769	-0.0488108	-0.278958	-0.828397	-0.4808	-0.397689	-0.791787	-0.288299	-0.591756	-0.349908	0.16045	0.102496	-0.262266
1368134_a_at	Il4r	25084	interleukin 4 receptor	-0.246239	-0.266971	-0.196249	-0.117121	0.0459303	-0.0263174	0.147083	0.19061	0.0750254	-0.022316	-0.0856628	-0.00327432	-0.40573	-0.0913426	-0.0926991	-0.524254	-0.362411	-0.140109	-0.224241	0.0717865	0.0100767	-0.0611756	-0.053259	-0.052432	-0.165595	0.273587	-0.0244993	-0.310126	-0.259427	-0.246268	-0.343207	-0.260336	-0.226341	-0.274597	0.0314071	-0.0524691	-0.134039	-0.0232287	-0.214507	0.0691289	0.0149011	0.161029	0.217866	0.252536	0.229404	0.196907
1368136_at	Tmpo	25359	thymopoietin	0.18488	-0.091201	0.120298	0.256956	0.169939	0.306048	-0.0867864	-0.0166786	0.0448856	0.0682006	0.16786	-0.0132756	-0.143176	0.0569068	0.110544	-0.099262	0.094873	-0.292347	0.139708	-0.0668451	0.278518	-0.0320045	-0.0485517	0.026698	0.118019	0.181645	0.0291343	0.226992	-0.245113	0.180347	0.291666	-0.0917513	-0.131627	-0.0887926	-0.0882976	-0.136384	0.466352	-0.0637923	0.405013	0.104833	-0.050642	0.0366141	0.0419208	-0.00683728	0.248188	0.147642
1368139_s_at	Alpl	25586	alkaline phosphatase, liver/bone/kidney	0.0358437	0.0193805	-0.147912	0.436391	-0.0976636	0.0916601	-0.279712	-0.205286	-0.143029	0.0896719	0.0191961	-0.0147797	0.0125889	-0.166827	-0.209971	0.340602	-0.13603	0.0360519	-0.172215	-0.144934	-0.188658	0.110676	0.0146989	0.022339	-0.263667	-0.0978109	-0.148232	0.29925	-0.0365213	-0.12491	-0.058387	0.0736099	-0.097486	0.0615018	0.057123	0.0808935	0.00873638	-0.138582	-0.197815	0.466321	0.210535	0.483017	-0.136999	0.15618	0.0155242	0.0330882
1368140_at	Wnk1	116477	WNK lysine deficient protein kinase 1	-0.084121	0.0675982	0.0605354	-0.737658	-0.555539	-0.510526	0.0861264	-0.251304	-0.0138515	-0.10385	0.228208	0.0421737	0.168572	-0.465468	0.00718303	-0.278012	0.092901	0.211743	-0.136817	-0.057151	-0.225462	-0.445364	-0.136935	-0.361425	-0.472954	-0.214882	-0.500898	0.180031	0.462029	0.50063	-0.170742	0.00911474	-0.0598878	0.0161665	0.124464	0.107734	0.00854384	0.147893	-0.0504071	-0.483497	-0.121123	0.0362881	0.185403	0.411951	0.0107244	-1.15214
1368143_at	Anxa7	155423	annexin A7	0.796552	0.421343	0.435983	1.15689	-0.182415	0.0732455	0.425235	-0.245086	-0.167234	0.169788	-0.137941	-0.0685757	0.753439	0.0812442	0.0101873	1.28374	0.127412	-0.0539465	0.318038	0.395358	0.166874	0.301054	-0.27481	-0.22685	0.644841	-0.231879	0.150328	1.07458	0.208833	0.427336	0.849915	-0.196158	0.180288	0.623108	0.0396718	0.0735272	1.64763	0.356006	1.19652	2.34125	0.621035	1.5739	1.20896	0.238439	1.00651	1.26754
1368144_at	Rgs2	84583	regulator of G-protein signaling 2	-0.217061	0.0256001	-0.289461	-0.520898	-0.291362	-0.139834	-0.0716028	-0.000130592	-0.0737016	-0.129561	-0.257104	-0.0111475	0.00286627	0.341524	0.063112	-0.234128	0.0838087	-0.0123816	-0.033497	0.144351	0.163514	-0.217822	-0.0689173	-0.0788834	0.216062	-0.0252261	0.0396144	-0.137876	0.0480624	0.0190768	0.220702	0.0708242	-0.0368442	0.00121782	-0.176507	-0.0856428	0.15341	-0.0863279	0.274151	0.359199	-0.136053	0.352802	0.162424	-0.26282	0.454547	0.404289
1368145_at	Pcp4	25510	Purkinje cell protein 4	-0.226208	-0.136975	-0.162791	-0.0697262	0.089374	0.00917593	0.0942814	-0.182431	0.0260866	0.363548	0.306824	0.0824995	-0.280277	-0.349967	-0.0127395	0.101205	-0.0961911	0.251883	-0.0837443	0.100704	0.0229704	-0.217761	-0.00189108	-0.161874	0.289692	0.41582	0.221295	0.933661	0.0542865	0.48227	-0.0676671	-0.117312	-0.17691	0.47077	0.0743705	0.0463744	-0.204447	-0.0909475	-0.248277	-0.353133	0.164434	-0.224855	-0.126681	-0.0266463	-0.585625	-0.120517
1368147_at	Dusp1	114856	dual specificity phosphatase 1	-1.66042	0.572139	-0.185709	-2.45898	-0.48958	-0.178254	-1.67368	-1.35063	-0.603359	-1.32697	-0.137481	-0.379857	-1.19092	-0.419861	0.382836	-1.73836	-0.404428	-0.473868	-0.181143	-0.288155	-0.238668	-1.75836	-0.452423	-0.553296	-0.556254	-1.00796	-0.258839	-1.46	-0.368814	-0.521449	-0.512166	0.255863	-0.257148	-0.802361	-0.66869	-1.81547	-0.846266	-0.383959	-0.440354	-0.72373	-0.217569	-0.242279	0.0910332	0.528016	-0.437058	0.160737
1368154_at	Gucy1a3	497757	guanylate cyclase 1, soluble, alpha 3	-0.136258	-0.119879	-0.0787927	-0.158767	0.0462448	0.142111	0.241078	0.0759751	0.129754	-0.0653128	0.0589867	0.0933869	-0.302661	0.0463853	-0.0162457	-0.187529	-0.0767869	0.030027	0.0237049	-0.167349	-0.0014906	-0.0124345	-0.055623	0.0642208	-0.139674	0.0879791	0.056152	-0.141454	-0.143495	-0.277191	-0.0349849	-0.0785801	-0.134227	-0.211321	-0.0502441	-0.134044	-0.238842	-0.275846	-0.245274	-0.289752	-0.242498	-0.226373	-0.430979	-0.0272903	-0.224307	-0.0961291
1368157_at	Stmn3	29246	stathmin-like 3	-0.126494	0.127009	0.157923	-0.249755	0.0467292	-0.0450691	-0.259132	-0.0245601	-0.00145822	-0.251873	-0.0967534	-0.0287509	-0.058024	-0.0643888	-0.0777933	-0.00872046	-0.16515	0.0229186	-0.151991	0.0635598	-0.0894571	-0.266261	-0.241139	-0.0263012	0.00858565	0.0998534	0.111987	0.0082793	0.0380291	0.0545812	-0.181369	0.00261585	-0.0701321	0.0101544	0.133202	0.205298	-0.211377	-0.00251107	-0.275392	-0.235154	0.0932009	-0.0847984	-0.124037	-0.00238321	-0.168717	-0.4254
1368158_at	Scfd1	54350	sec1 family domain containing 1	-0.105656	-0.120996	-0.108061	0.200761	-0.0190339	-0.0583465	-0.0228088	-0.137686	0.0667425	-0.052765	0.00574502	-0.0204868	-0.16875	0.133775	-0.0160634	0.119619	0.13646	0.0827726	0.317124	0.182766	0.380149	-0.257349	0.0821429	-0.108061	0.41531	0.326729	0.22864	0.32297	-0.0863363	0.154895	0.252414	-0.00010881	0.198094	0.385336	0.0997653	0.156776	0.253173	-0.0194774	0.0816185	0.322645	-0.00735845	0.0285663	-0.346164	-0.247784	-0.375488	-0.168197
1368160_at	Igfbp1	25685	insulin-like growth factor binding protein 1	0.684875	-0.794939	-0.135883	1.66766	-1.11351	0.158362	0.328438	0.0401688	0.0324207	-0.169249	-1.43495	-1.35488	0.735304	0.837427	0.979381	0.379614	-1.12613	-0.19362	0.412168	-0.0257843	0.874156	0.583918	0.912775	0.16184	0.74142	0.479766	-0.0597728	-0.520781	0.0335905	0.18615	-0.892029	-1.08544	-1.09247	-0.308342	-0.020071	-0.759873	1.52838	0.216443	1.14285	2.53573	-0.0440674	2.20999	0.108834	-1.60898	-0.0541523	1.22094
1368163_at	Dpp4	25253	dipeptidylpeptidase 4	-0.0876126	-0.161624	-0.156197	-0.0106342	0.0417855	0.0889914	0.0948428	0.157342	0.0278984	0.239138	0.167864	0.168577	0.173961	0.195544	0.0776013	0.223043	0.0423538	0.0289115	0.160147	0.128436	0.212591	0.253856	-0.0286501	-0.0363065	-0.0467941	0.117418	0.0996427	-0.109799	0.0133243	0.0184914	-0.0589281	-0.00378213	0.0349465	0.0348196	0.0915429	0.0637788	-0.183466	-0.05936	-0.134974	-0.458218	-0.0872698	-0.228929	-0.341862	-0.103797	-0.203313	-0.0396965
1368164_at	Blvra	116599	biliverdin reductase A	-0.261387	0.151408	0.0435486	0.151947	-0.0898695	0.0855683	0.186837	-0.0326057	0.0135532	-0.213275	-0.0719675	-0.0904809	-0.0694837	0.276953	0.13938	-0.270762	0.120485	0.000822107	-0.0806953	0.113042	0.139598	-0.560283	0.00179214	-0.17557	0.00422838	-0.245571	-0.0170834	0.149346	0.0841522	0.0342955	0.149548	-0.0537588	0.142448	0.0960173	0.0600786	0.0561876	0.243438	0.118794	0.379234	0.102318	0.060572	0.0854627	-0.0198965	-0.048969	0.326934	-0.0220253
1368166_at	Arl2	65142	ADP-ribosylation factor-like 2	0.341314	0.181755	0.207571	-0.117394	-0.182199	0.0923058	0.00202449	-0.19521	0.00425198	0.0604594	0.0938946	0.251708	0.119794	-0.0758855	0.0504675	0.0362147	0.0867055	0.0309725	0.1463	-0.163214	-0.125951	-0.23952	-0.201047	-0.103447	0.00797262	0.0490097	0.0355132	0.117318	0.0722162	0.165513	-0.233373	-0.0475405	0.102532	0.0355812	0.0308084	-0.0445914	0.278604	-0.11868	0.260838	0.423733	0.0838311	0.289174	0.096278	-0.0149097	0.20369	0.190734
1368167_at	Ctse	25424	cathepsin E	-0.633549	-0.151004	-0.439029	-1.01068	-0.387446	-0.44266	-0.0574792	0.0415556	-0.272608	-0.335893	0.0848652	0.0220731	-0.0893021	0.305951	0.360144	-0.563721	0.00414959	-0.176007	-0.292187	-0.074235	-0.066296	-0.389418	0.0941527	0.269247	0.236587	-0.0835662	-0.0427396	-0.373632	-0.164605	-0.0537525	0.2708	0.00523369	-0.109632	0.0236055	-0.0529379	-0.233725	-0.110421	-0.105884	0.130077	-0.00899052	0.174036	-0.0855672	0.137115	-0.222504	0.23099	0.0468144
1368168_at	Slc34a2	84395	solute carrier family 34 (type II sodium/phosphate cotransporter), member 2	-0.945058	0.507124	0.232975	0.45991	0.152407	0.76305	0.0956133	0.153349	0.413643	0.701234	0.427695	0.221266	-0.40239	0.115148	-0.0372223	-0.985317	-0.32376	-0.452514	-0.235539	0.437172	-0.146995	-0.565149	0.175523	0.452909	-1.32558	0.999402	0.0717433	-2.56498	-0.596567	-1.02897	-1.20761	-0.00275136	-1.00279	-0.775251	-0.554682	-0.598176	0.0436398	-0.234035	-0.000838187	-0.862237	0.346806	-0.450085	-0.456102	-0.0358608	-0.268287	-0.347684
1368171_at	Lox	24914	lysyl oxidase	-4.25067	-0.12104	-0.644715	-3.10815	1.69305	0.885949	-1.81118	0.209972	0.411562	-2.52374	0.456619	0.00245748	-2.56332	-0.208917	0.357796	-3.47286	0.487533	0.412937	-1.21897	-0.642785	-0.507101	-3.24651	0.108756	-0.968784	-2.63605	-1.64715	-2.14703	-2.93389	-0.298308	-1.72526	0.130793	0.442405	-0.594081	-1.61216	-0.801652	-1.53351	-2.47261	-2.02253	-2.4906	-2.37786	-1.69125	-2.42804	-2.39689	-1.3881	-2.36337	-1.90739
1368173_at	Nop58	60373	NOP58 ribonucleoprotein	0.0918173	-0.0112508	0.112978	0.331436	0.160521	0.145861	0.111553	-0.0708824	0.058757	-0.0747615	-0.115939	-0.349938	0.129583	0.26021	-0.05864	-0.137064	0.113021	-0.133103	0.318949	0.0359606	0.121306	-0.0178872	0.0334313	-0.307143	0.0513261	-0.315467	-0.197588	0.534639	0.293896	0.200433	-0.012129	-0.0190361	-0.303181	0.143552	0.0401665	0.352667	0.642542	0.100037	0.451994	0.191871	0.0189993	0.0400604	0.109203	-0.020233	0.174367	0.0247972
1368175_at	Zhx1	171159	zinc fingers and homeoboxes 1	0.0217705	-0.0628106	-0.0969759	0.0271684	0.0484342	0.104875	0.0261633	0.0505882	0.0421022	0.132021	0.154113	0.0887314	-0.194651	0.278633	-0.0448782	-0.0878963	0.0103951	-0.160818	0.411397	0.0962492	0.491284	0.156766	0.105907	0.056978	0.18106	0.123987	0.126331	0.218481	0.0806149	0.0638683	-0.0446714	-0.183204	-0.163347	0.241905	0.0796227	0.0844524	0.0642942	0.00828926	-0.017714	-0.0679464	-0.0385184	-0.144866	0.261406	0.168224	0.239477	0.0652757
1368177_at	Acsl3	114024	acyl-CoA synthetase long-chain family member 3	0.346708	0.244932	0.158473	0.375634	-0.16125	0.223773	0.127681	0.118268	0.118977	0.30234	0.256978	0.295872	0.0437672	0.251914	-0.107951	0.818353	0.526063	0.354557	0.387783	0.0519927	0.519749	-0.070774	0.149352	0.0901842	-0.529347	0.0272691	-0.0268455	-0.748215	-0.029851	-0.163045	-0.380259	-0.0407134	-0.190178	-0.671548	-0.247287	-0.320887	0.547849	-0.0356199	0.399467	0.738774	0.312551	0.520464	-0.0603497	-0.167924	0.116657	-0.144341
1368178_at	Pdzk1	65144	PDZ domain containing 1	0.516716	-0.13861	-0.10298	0.353211	-0.0244858	-0.040999	0.203692	0.0939128	0.19902	0.0417586	0.116123	0.101651	0.155011	0.182227	0.27416	0.114209	0.0129949	0.131699	0.41319	0.277811	0.402356	0.597897	0.143829	0.213545	0.0709479	-0.0492927	-0.0372207	-0.219861	-0.0464445	-0.0673891	-0.0713907	-0.2364	-0.118711	0.0782214	0.0599722	-0.110626	0.0996964	-0.0716989	-0.0127712	-0.248655	-0.0855896	-0.154301	-0.143839	0.0721494	0.130361	0.230239
1368181_at	Mthfd1	64300	methylenetetrahydrofolate dehydrogenase (NADP+ dependent) 1, methenyltetrahydrofolate cyclohydrolase, formyltetrahydrofolate synthetase	0.860171	-0.00773464	-0.0298502	0.884978	0.102884	0.208015	0.0757607	0.143341	-0.0489606	0.238958	-0.0881831	0.148715	0.132994	0.0144696	-0.0963518	-0.013363	0.0335199	0.120789	0.104	0.126797	0.227589	0.383582	0.0661537	0.0418676	0.220079	0.0612369	-0.0719002	0.458034	0.223449	0.196592	-0.032686	0.0414832	0.238503	0.486879	0.529467	0.50371	-0.0805975	0.0563269	0.2346	-0.262961	-0.156169	-0.086622	-0.15018	0.0482551	-0.00351137	-0.0834827
1368184_at	Psmd9	161475	proteasome 26S subunit, non-ATPase 9	0.0505368	0.0594577	0.0823184	-0.0661554	0.0286849	0.0398234	-0.153502	0.0188642	0.136569	-0.196742	-0.0761968	0.00596716	0.133626	-0.0271702	0.152789	0.104519	0.0517421	0.0670374	0.166788	-0.0753241	0.0047942	0.167698	0.260762	0.0444885	0.203545	-0.0499451	-0.0719634	0.0391925	-0.100139	-0.0475657	-0.0438983	-0.0913766	-0.163031	-0.143982	0.0440923	0.0384984	0.0758296	0.0839649	0.0593828	0.0159305	-0.135436	-0.234396	-0.0441156	0.0851061	-0.0373609	-0.18434
1368186_a_at	Syk	25155	spleen tyrosine kinase	-0.158213	-0.0974283	-0.162534	0.0790324	0.151038	-0.0293329	0.0498156	-0.159593	-0.118808	-0.272122	-0.336042	-0.179844	0.210171	-0.0681017	0.0266967	-0.349305	-0.295424	-0.0957865	-0.236082	0.0298697	-0.403456	-0.128372	0.0516427	0.0219863	-0.0966778	-0.10026	-0.0157568	-0.119955	-0.0213188	-0.0788775	-0.0440543	-0.130396	0.0177259	-0.117367	0.00521134	-0.107815	0.321129	0.245477	0.35108	0.115634	-0.0706544	0.155021	0.266211	-0.00719474	0.0695894	0.36314
1368187_at	Gpnmb	113955	glycoprotein (transmembrane) nmb	1.826	0.26962	-0.200147	2.38074	0.0115209	0.259672	0.303751	0.412857	-0.226717	-0.117608	-0.255691	-0.251025	0.535917	0.750025	0.237256	0.440568	0.890838	0.52691	0.0323356	-0.15253	-0.690606	0.591607	0.350049	0.53397	-0.125671	0.088995	0.274036	0.0904919	0.202751	-0.233773	2.06939	0.279287	0.628653	-0.278556	-0.156492	-0.457213	3.20493	1.00195	3.03442	2.77913	0.676564	2.31272	2.71484	0.246744	3.21601	2.03207
1368189_at	Dhcr7	64191	7-dehydrocholesterol reductase	0.181844	-0.0775853	-0.0505024	0.111076	-0.215469	-0.0954241	0.00678288	0.195663	0.0505186	-0.0384416	-0.157846	-0.124832	0.634572	-0.226242	0.0688627	0.901712	0.148718	0.452206	0.500022	0.391862	0.290159	0.42816	0.0817511	-0.185002	0.460166	0.145251	-0.05392	0.416492	-0.0926368	0.119994	0.0514657	-0.33198	-0.0889956	0.367078	-0.00917584	0.0170385	-0.0137346	-0.057575	-0.359898	-0.230514	-0.172102	-0.247916	-0.0749662	-0.00764601	0.052515	-0.306929
1368190_at	Ren	24715	renin	0.397917	0.0239998	0.0876122	0.279763	0.0293638	0.205135	-0.0258609	-0.167718	-0.0418116	-0.382299	-0.278308	-0.19438	-0.152258	-0.0637576	-0.101202	-0.11017	0.0432392	0.113567	0.0723103	0.130441	0.0695323	0.180493	0.0216319	0.20686	0.331417	-0.0197331	0.148816	0.143572	-0.0570854	-0.449387	0.0268567	-0.146248	0.0446656	-0.0253223	0.166554	0.0356369	0.140244	0.107762	-0.033024	0.0109835	-0.11812	-0.0979306	-0.0248032	0.255282	-0.157969	-0.346564
1368199_at	Nup88	113929	nucleoporin 88	-0.346589	-0.110431	-0.0154687	-0.209001	0.189656	0.0792124	-0.0469343	-0.0584438	-0.113223	-0.0917264	0.0510428	-0.0102677	-0.351182	0.265061	-0.0355512	-0.37435	-0.0215115	-0.132368	-0.100035	-0.103204	0.130171	-0.26817	-0.0484104	-0.105116	-0.0065622	0.0825215	0.0763942	0.0257826	0.0523469	-0.00992455	0.0903544	0.110985	0.06045	0.00461709	-0.030633	-0.0116307	0.0871651	-0.0560294	0.125547	-0.036476	0.115967	-0.000556467	-0.0786358	0.126661	0.122807	-0.0380788
1368202_a_at	Dab2	79128	disabled 2, mitogen-responsive phosphoprotein	0.063271	0.0189288	-0.0335234	0.250497	0.0901399	0.108306	0.131465	0.0233052	0.0179493	-0.0455096	0.0339231	0.0188886	-0.017019	0.016757	-0.152803	-0.0831991	-0.111853	-0.236357	-0.0162032	-0.0452571	-0.103062	-0.134003	0.00616822	-0.0631331	-0.0858191	0.120444	0.00177186	-0.139651	-0.0473908	-0.0776247	0.211871	-0.100527	-0.147551	0.0773773	-0.0551881	-0.0699756	0.318856	0.17773	0.277874	0.257973	-0.0122839	0.151368	-0.15483	-0.0950235	-0.0802925	0.0024587
1368206_at	Acot8	170588	acyl-CoA thioesterase 8	0.164828	-0.0723364	0.0840322	0.495967	0.0577153	0.101162	0.097961	0.0186695	0.0356353	0.264416	-0.101916	0.0908501	0.103351	-0.131523	-0.0108932	0.251011	-0.00688532	-0.0122531	-0.0807602	0.0156182	0.00879775	-0.0527633	-0.0172539	-0.104407	0.130761	-0.0201271	0.183719	0.124744	0.044725	0.0201287	0.00355502	0.00727179	0.167361	0.207431	0.195115	0.272561	0.216911	-0.0300866	0.0158672	0.300225	0.0166616	0.191094	0.0725782	0.0590727	-0.0569714	0.157936
1368207_at	Fxyd5	60338	FXYD domain-containing ion transport regulator 5	-0.329032	0.274958	0.0220061	-0.251934	-0.0840793	0.16105	0.0258637	0.00567296	-0.296318	-0.321756	0.0484695	-0.0718685	0.00401257	0.0405297	0.231666	-0.143648	0.124326	-0.0146189	-0.0892317	0.144175	-0.048831	-0.191849	0.169534	-0.169711	0.132544	-0.213769	0.0272541	-0.0157796	-0.00694226	-0.0593853	0.507463	-0.1517	-0.0219027	0.188262	-0.00432541	0.114488	0.722429	0.173764	0.486147	1.06582	0.19467	0.740139	0.818932	-0.086452	1.28966	0.501124
1368208_at	Nat8b	171084	N-acetyltransferase 8B	0.0214398	0.226446	0.0914387	0.0396727	0.206435	-0.0658685	-0.409334	-0.0498545	-0.267603	-0.265673	-0.180624	-0.076766	-0.0131696	0.0258041	0.2849	-0.077897	0.153051	-0.100184	-0.304918	-0.291004	-0.0871723	0.293018	0.0283393	-0.0998855	-0.256686	-0.19065	-0.0688817	0.200831	0.270843	0.141089	0.042466	-0.154259	0.0678679	-0.128692	0.00332006	0.152733	-0.0540992	-0.0471197	-0.199623	0.307099	0.00841672	-0.0825176	0.10079	0.085457	0.0631489	-0.30297
1368210_at	Il24	170819	interleukin 24	-0.100156	0.117161	0.0461653	-0.09293	0.128318	-0.099131	-0.066185	-0.0245453	0.014712	-0.292278	-0.112995	-0.12478	0.108271	-0.110505	-0.00528973	-0.0713625	0.107223	0.144734	0.0210988	-0.027746	-0.128754	-0.045283	-0.0784869	-0.168778	0.0886557	0.00803595	0.228597	-0.0424551	0.148558	-0.128437	-0.175055	-0.0319368	-0.0860606	-0.201016	0.0196361	-0.00370098	-0.17991	0.0220741	-0.20565	-0.238338	0.00447002	-0.078939	-0.0297591	0.109801	-0.141757	0.0240129
1368213_at	Por	29441	P450 (cytochrome) oxidoreductase	2.10371	0.41354	0.483442	1.63113	-0.219601	0.237126	0.644128	-0.304241	0.181184	0.987216	-0.403939	-0.00813171	0.562721	-0.132419	0.26782	0.927488	-0.272228	0.216638	0.778079	-0.150761	0.279046	1.17292	-0.219117	-0.14104	0.468658	-0.0102138	0.155508	0.646817	0.12882	0.410074	0.372147	-0.194842	0.0721536	0.187443	0.187062	0.0769041	0.711656	0.273059	0.275585	0.646472	0.220378	0.426987	0.600423	0.415759	0.468565	0.518021
1368218_at	Ralbp1	84014	ralA binding protein 1	0.108768	0.163113	0.17235	0.23003	0.0735756	-0.0859414	0.123498	0.150263	0.0847153	0.103181	0.144728	0.362729	-0.118683	0.135584	0.0141045	0.275999	0.339688	0.203585	0.209134	-0.235767	0.257038	-0.145659	-0.0874246	0.144169	-0.0204084	-0.301807	-0.214435	0.0576359	-0.0713644	0.101153	0.0857713	0.0403218	0.31656	-0.122855	-0.0402711	-0.0521331	0.259787	0.198316	0.155652	0.143696	-0.10131	0.0638961	0.333621	0.00627194	0.351516	0.159658
1368220_at	Gtf2b	81673	general transcription factor IIB	0.2668	-0.0992268	-0.0606726	0.309711	-0.141302	-0.097845	0.0967181	-0.0927831	-0.156034	0.148312	-0.0400203	-0.0347117	0.185256	-0.0553144	0.0972832	0.0584526	-0.123924	-0.0645144	-0.0166558	0.159929	0.262442	0.166221	0.0468116	-0.0388258	0.352933	-0.0763544	0.0330581	0.185323	-0.0594338	0.0256695	0.183666	0.00453336	0.199928	0.0871059	-0.0142776	-0.033292	0.213141	0.141423	0.135667	0.310243	0.0542878	0.265164	0.148902	0.0390514	0.151683	0.219063
1368222_at	Nr3c1	24413	nuclear receptor subfamily 3, group C, member 1	-0.503959	0.178082	0.361442	-0.634528	0.207081	-0.094387	-0.22743	0.0610239	0.157308	-0.640652	0.111227	-0.312367	-0.83631	0.869783	-0.660916	-0.549504	0.381911	0.118165	0.293081	-0.0808943	0.148313	-0.39379	0.101543	-0.000699999	-0.478	-0.340102	0.211909	-0.223922	0.187543	-0.0875962	-0.303645	0.0719772	0.125829	-0.0392167	0.0503097	0.297568	-0.0010479	0.103653	-0.175708	-0.87217	-0.0286041	-0.591811	-0.172564	0.204277	0.137033	-0.436053
1368223_at	Adamts1	79252	ADAM metallopeptidase with thrombospondin type 1 motif, 1	0.614172	-0.180629	-0.0525272	0.801279	0.0878514	0.0942231	0.74571	0.136148	0.315419	0.172699	-0.0347305	-0.217438	-0.0123333	0.0134453	0.104803	0.221537	0.298633	0.152535	0.156982	-0.25067	0.367542	-0.0251959	0.254826	-0.0707832	0.0785565	-0.278003	-0.273439	0.105238	0.116761	0.00167412	-0.23301	-0.0289199	-0.427341	-0.251015	-0.350061	-0.138976	-0.176312	-0.274722	-0.284383	0.244084	0.108241	0.133665	-0.292802	0.136197	0.132502	0.209475
1368225_at	Exoc2	171455	exocyst complex component 2	-0.017861	0.0521053	-0.0119067	-0.0249966	-0.0589646	-0.0521348	-0.047257	0.0155907	-0.0872573	-0.212765	-0.0865264	-0.0139021	-0.324637	0.0631917	-0.186014	-0.119742	-0.0724295	-0.141063	0.0828141	-0.0546567	0.0770861	-0.275083	-0.00566733	-0.0869738	0.0624085	0.101011	0.0352985	0.160584	-0.0229588	0.0524776	-0.0515767	-0.164373	-0.021484	-0.0413315	0.0124011	-0.0921815	-0.028257	-0.0762376	-0.0695331	0.0734435	-0.110612	-0.0312574	0.0116347	-0.00725863	0.132117	0.0365909
1368226_at	Dnph1	171047	2'-deoxynucleoside 5'-phosphate N-hydrolase 1	-0.0252466	-0.0323869	0.0571196	0.139434	0.0997399	0.237174	-0.0488186	-0.00833371	0.150476	0.0046594	-0.0961301	-0.0243491	-0.110171	-0.15066	-0.00546463	0.0297181	-0.184329	-0.046761	-0.0437623	-0.0682979	0.0884982	-0.0540973	0.00904531	-0.0430225	0.405318	-0.0291157	0.220346	0.219237	0.0188363	0.0630868	-0.00799968	-0.0214696	0.0264156	0.398253	0.287785	0.324711	0.0723502	-0.17756	0.12978	0.0714239	-0.147012	-0.036392	-0.0262446	0.135739	0.0256785	0.0323347
1368227_at	Slc28a2	60423	solute carrier family 28 (concentrative nucleoside transporter), member 2	-0.896778	-0.0760003	-0.565654	-0.554064	-0.305833	0.196276	-0.334591	0.131978	-0.280726	0.00505039	-0.193892	-0.0839873	-0.181657	0.539897	0.0923176	-0.205465	0.202058	-0.0234287	-0.247227	-0.347056	-0.269595	-0.694975	-0.294168	-0.493488	-0.283125	0.567116	0.0180398	-0.33724	-0.546805	-0.228015	-0.146534	0.179184	-0.371938	-0.396625	-0.757109	-0.61605	-0.274727	-0.25832	-0.413724	-0.331903	0.0290013	-0.183004	0.0649042	0.293874	0.498508	-0.293992
1368229_at	Gemin2	84404	gem (nuclear organelle) associated protein 2	-0.310839	-0.0286946	-0.10925	-0.244861	-0.14268	-0.0321101	-0.140711	-0.214516	-0.104577	-0.289426	-0.136351	0.0409333	-0.244872	0.00650664	-0.00940916	-0.161012	0.162395	0.00305043	-0.0459084	0.0082845	0.129919	-0.0660376	0.0572747	0.0757698	-0.0609486	0.0387544	-0.111737	-0.0169252	0.084979	0.0376713	0.0221796	-0.0201728	-0.0277898	-0.0033619	0.0941495	0.0592498	-0.0304763	-0.202686	-0.08509	0.0407158	-0.0948721	-0.252326	-0.0187427	0.0951651	0.111883	-0.143178
1368230_a_at	Ndufaf3	56769	NADH dehydrogenase (ubiquinone) complex I, assembly factor 3	0.15371	-0.0395443	0.0322511	0.189734	-0.0223498	0.135897	0.0405486	-0.0309493	0.0296523	0.11225	-2.66113e-05	0.121212	0.0427454	0.096567	0.00113583	0.0125291	-0.0106813	-0.0061563	0.0825029	0.00831944	0.0411316	0.036489	0.072349	0.0455131	0.286669	-0.0633277	0.0463569	0.218693	0.0571088	0.0636268	0.163269	0.0485313	0.0950519	0.337147	0.150536	0.226989	0.263255	0.0810537	0.119503	0.145432	-0.0563087	0.0126432	0.0411399	0.127692	0.187927	-0.04268
1368232_at	Mvk	81727	mevalonate kinase	0.318935	-0.0658808	-0.0817791	0.683796	-0.0434518	0.0850719	0.0405359	0.282213	0.0804878	0.136544	0.0632498	-0.0039106	0.282045	-0.310325	0.25412	0.601956	0.0222862	0.329885	0.144461	0.200414	0.313333	0.576454	0.211711	0.0913396	0.199524	0.216429	0.250481	0.349213	0.0182048	0.402687	0.10582	-0.0261937	0.148692	0.176496	0.136877	0.172051	-0.0272258	-0.11118	-0.252129	-0.199404	-0.275367	-0.320871	-0.237945	-0.185357	-0.0819033	-0.264945
1368233_at	Gtf2f2	81674	general transcription factor IIF, polypeptide 2	0.378645	0.105311	0.12941	0.391246	0.0155603	0.0180033	0.0950171	0.0548071	0.169776	0.443122	-0.0120658	0.103263	0.240536	-0.0897371	0.105234	0.271648	0.224026	0.170634	0.113009	0.0370274	0.183863	0.0902978	0.0773498	0.0088954	0.169644	-0.0054601	-0.0469297	0.213834	-0.00125425	0.129555	-0.23218	-0.287059	-0.290755	0.249393	0.134618	0.179924	0.114068	-0.00712349	-0.0527499	0.0983607	-0.0836464	-0.105079	0.108025	0.0101451	0.106698	-0.23214
1368234_at	Prep	83471	prolyl endopeptidase	-0.0183011	-0.214491	-0.190514	0.155402	0.139888	0.223767	0.0127215	0.0353761	0.146489	0.283228	0.196952	0.292845	-0.154855	-0.113783	-0.143068	-0.212883	-0.313236	-0.262012	0.0779783	-0.0671466	0.211093	0.0512337	0.0124293	0.0574687	-0.0964759	-0.108026	-0.322325	-0.125767	-0.273666	-0.094034	0.137723	-0.0646534	-0.00728421	-0.191838	-0.147798	-0.284294	0.035056	-0.00620071	-0.0731734	-0.00445755	-0.143411	-0.0608831	-0.0923647	-0.198225	-0.0204386	-0.127379
1368236_at	Mep1a	25684	meprin 1 alpha	-0.21424	-0.0428577	0.00136791	0.149989	-0.0386843	-0.0261786	-0.0359217	-0.0422394	-0.0934971	0.02639	-0.00221546	0.0207502	0.244657	-0.123502	-0.220045	0.0185511	0.0498199	0.158714	-0.245066	-0.0860383	-0.213913	-0.121094	0.0684686	-0.0690347	-0.0505558	-0.0880359	0.11374	0.00237983	-0.00209248	-0.0644729	-0.135658	0.0985214	-0.123267	-0.25353	-0.140777	-0.288638	0.0796643	0.179878	0.0148396	-0.306097	0.00370734	-0.0293981	-0.370112	-0.0395365	-0.251117	-0.0799177
1368237_at	Tnmd	64104	tenomodulin	-0.125685	-0.0854784	-0.259041	0.111867	0.113287	0.0915317	-0.0584332	-0.00258519	0.0406653	0.0279319	-0.0279941	0.022116	-0.217593	-0.395826	-0.238207	0.216559	0.0416629	0.00466785	0.0454454	0.168504	-0.163785	-0.0396618	0.0473193	0.0186923	-0.0339385	0.0443374	0.0294189	0.164158	0.136537	0.160334	0.0938703	-0.0747897	-0.0332703	-0.0206925	0.0114227	0.0895482	-0.0941525	-0.0425963	-0.117454	-0.229201	-0.109579	-0.148391	-0.0928042	0.178201	-0.195876	-0.155605
1368244_at	As3mt	140925	arsenite methyltransferase	0.43383	-0.0726313	0.0645755	0.215524	0.0933899	0.00950233	0.0682253	-0.060098	-0.124061	0.157637	-0.0904444	0.0810546	0.0360522	-0.112542	-0.00801263	0.119295	-0.0296653	0.0410451	-0.0461453	-0.0999708	0.0609301	0.184548	-0.083179	-0.00474966	-0.178862	-0.0679397	-0.0646651	-0.133257	0.00291116	-0.0293795	-0.107899	-0.0584798	-0.0061474	-0.305122	0.012519	-0.0378031	-0.0819135	-0.0346118	-0.215892	-0.100099	-0.0553685	-0.138219	-0.0762563	0.0387685	-0.134086	-0.0530454
1368245_at	Upb1	116593	ureidopropionase, beta	0.164513	-0.0658476	0.0784472	0.0326417	0.050611	0.0077419	0.507719	0.628538	0.577263	-0.140457	-0.314646	0.00119379	0.176306	-0.0450746	-0.216475	-0.355385	0.0781793	-0.180997	-0.324101	0.292312	0.197354	-0.29354	0.152658	-0.14091	0.126173	0.41355	0.413194	-0.692006	-0.203068	0.00899033	0.0634899	0.254487	0.280724	-0.24171	-0.357967	-0.2328	-0.147218	0.612958	0.0397352	-0.40057	0.0261312	-0.00958776	-0.143735	0.0869467	0.103466	0.109835
1368246_at	Ap3m2	140667	adaptor-related protein complex 3, mu 2 subunit	-0.219086	-0.040568	-0.200458	-0.0927946	0.0241658	0.0141729	-0.0412912	0.305684	-0.0997355	0.0392955	-0.205102	-0.0507127	-0.0162849	-0.0953543	-0.0576348	-0.0548469	0.0024717	0.210822	-0.285197	-0.0272397	-0.0836524	0.202583	0.0344261	-0.0178012	0.136689	0.243221	0.0153179	0.145774	0.18201	-0.0625111	-0.0648858	-0.172051	0.0166055	0.0654467	0.00264329	-0.0139119	-0.171804	-0.296391	-0.317686	-0.00717352	-0.241388	0.0116343	-0.17761	-0.115145	-0.0572044	0.178717
1368248_at	Cds1	81925	CDP-diacylglycerol synthase 1	0.618689	0.191444	0.464165	0.243228	-0.0694448	0.0122941	-0.368993	-0.627098	-0.432759	-0.0335313	-0.0419822	-0.185718	0.27199	-0.171016	0.179229	0.817672	0.0896977	0.078016	0.202117	0.0626022	0.272054	0.703792	-0.217919	-0.0814157	-0.251612	-0.0232444	0.0914773	0.283329	-0.163728	0.227111	0.257873	-0.0167541	0.183469	0.220309	0.239797	0.424658	0.174477	-0.0896216	0.267638	1.16042	0.420134	0.859669	0.32115	-0.325534	0.294995	0.0280994
1368259_at	Ptgs1	24693	prostaglandin-endoperoxide synthase 1	-0.266191	0.109764	0.0674709	0.0969669	-0.263043	-0.104104	0.481549	0.0282012	-0.0245303	-0.276315	-0.296857	-0.141257	-0.0591695	0.405399	0.426587	-0.261611	0.259196	0.194557	-0.041037	-0.00903392	-0.00617196	-0.0669868	0.07085	0.153035	-0.140877	-0.110739	-0.274785	0.00219292	-0.144037	-0.072623	0.189107	-0.218602	0.0053756	0.120883	-0.0700025	0.0335919	-0.138	-0.0674161	0.108178	0.138837	0.0709022	0.236972	0.396563	-0.183332	0.700352	0.207457
1368260_at	Aurkb	114592	aurora kinase B	-0.743069	0.0522761	-0.123614	-0.57011	0.138511	0.416118	-0.555278	0.289485	0.109969	-0.930287	0.252458	0.162768	-0.546451	0.060161	-0.0324863	-0.379382	0.14336	-0.173134	-1.83002	-0.646517	-0.544384	-2.04344	-0.316834	-0.576304	-0.0869609	0.337003	0.215639	-0.408187	-0.13491	-0.027159	0.641052	0.0679152	-0.440362	-0.598223	0.117487	-0.368398	1.35317	0.248463	1.38453	0.712203	0.602421	0.673838	0.0822343	0.335299	0.382539	1.01763
1368262_at	Phlpp1	59265	PH domain and leucine rich repeat protein phosphatase 1	0.324121	-0.215073	-0.117598	0.0586869	-0.0164833	-0.0499409	0.129583	-0.329297	-0.324066	0.221368	-0.104496	0.0648784	-0.0687906	-0.0277399	-0.139514	-0.0296792	-0.111693	-0.198878	0.376636	-0.0748728	0.275622	0.13714	0.0923733	0.034683	-0.125159	-0.169815	-0.181899	0.0618873	0.0346892	-0.0572447	0.174492	0.0216052	0.246468	-0.06366	0.0609834	-0.0871185	-0.0214439	0.188543	0.0221342	0.0993168	-0.0428097	0.129742	0.303573	0.000378429	0.391983	-0.128284
1368265_at	Cyp2t1	171380	cytochrome P450, family 2, subfamily t, polypeptide 1	-1.13421	-0.16514	-0.268181	-0.960194	0.238688	-0.0201638	-0.294755	0.110379	-0.112214	-0.470654	0.052955	-0.184148	-0.579989	0.0330669	0.141084	-0.861637	-0.366525	-0.473112	-0.341205	-0.115219	0.197221	-1.01934	0.0541458	-0.0708697	-0.471038	-0.180995	-0.226383	-0.396276	0.0609941	-0.135589	-0.836326	-0.169905	-0.285478	-0.48818	0.0766103	-0.0615263	-0.810708	-0.0568063	-0.559557	-0.960406	-0.433727	-0.440449	-0.604795	-0.125808	-0.442942	-0.547984
1368267_at	Pomt1	84430	protein-O-mannosyltransferase 1	-0.0514605	-0.105795	-0.00538594	-0.0369139	-0.0541121	0.088685	-0.0240348	0.0352003	-0.0590304	-0.101376	-0.0433506	0.0923066	-0.0510432	0.0324747	0.134218	0.12895	0.0987672	0.0469532	0.0666434	0.148909	0.332592	-0.102157	-0.101436	-0.13023	0.0130183	0.111528	0.071096	-0.0884776	-0.0742989	-0.110499	-0.0154517	-0.0422337	-0.0783934	0.136035	0.0437498	0.0602644	0.171608	-0.0235633	0.15864	0.146674	0.0359236	0.150692	-0.24412	-0.0644705	0.059164	0.275278
1368270_at	Apobec1	25383	apolipoprotein B mRNA editing enzyme, catalytic polypeptide 1	0.279388	-0.14461	-0.297133	0.268591	-0.151307	-0.228449	-0.00262279	-0.0793233	-0.0786544	-0.450758	-0.092409	-0.140082	0.055638	0.335331	-0.171922	-0.0286032	-0.0272284	-0.355354	-0.153515	-0.266097	0.0697542	-0.357418	0.0769348	-0.0503794	0.270547	0.285469	0.333436	0.101386	0.0739365	0.0455926	0.88236	0.304133	0.441104	0.232045	-0.0635215	-0.0316861	0.784324	0.301632	0.627913	0.417478	-0.17928	0.349741	0.103647	0.0808826	0.130229	0.656433
1368271_a_at	Fabp4	79451	fatty acid binding protein 4, adipocyte	-0.920591	-0.0874983	-0.516278	-0.357473	-0.0674015	0.189373	-0.540975	0.0200075	-0.591408	-0.487406	0.276222	0.26859	-0.0196618	0.44741	0.0642647	-0.204773	-0.0533373	-0.384871	-0.0462911	-0.457169	0.266022	-0.0265759	-0.0261283	-0.00554145	0.184105	-0.461756	-0.411933	0.303419	-0.0961786	0.0848131	1.16613	-0.041516	0.28793	0.31312	0.183975	0.25141	2.52333	0.460233	2.48986	2.49202	0.216213	2.00294	1.04784	-0.432436	0.779475	1.52176
1368272_at	Got1	24401	glutamic-oxaloacetic transaminase 1, soluble	-1.01159	-0.294001	-0.200642	-1.1543	0.0404235	-0.169657	-0.696827	0.0990011	-0.0189282	-1.07718	-0.0688218	-0.222525	-0.352988	0.0698968	0.0267842	-0.52344	0.348463	0.254657	-0.0170267	-0.581541	0.00900333	-0.72271	0.0694013	-0.552525	-0.598634	-0.733797	-0.290595	-0.346481	0.289939	-0.127691	-0.016588	0.242269	0.132364	-0.381766	-0.0477586	0.0710142	-0.129718	0.0353937	-0.135505	0.00020431	-0.13842	-0.273208	0.0497426	0.364199	-0.158343	-0.0998467
1368273_at	Mapk6	58840	mitogen-activated protein kinase 6	-0.0343275	0.00470293	0.0838101	-0.22044	-0.111518	-0.0705296	-0.181059	-0.221845	-0.0236717	-0.180411	-0.0118569	-0.11773	-0.0253112	0.0137905	-0.131245	-0.303869	-0.00839199	-0.121121	0.11962	0.0121676	0.0804638	-0.0802385	-0.0932739	-0.106846	-0.0881844	-0.0672335	-0.0446869	0.033657	0.00654483	-0.0126529	-0.11327	0.00724147	-0.140938	-0.0829803	-0.0419164	0.100377	-0.164124	-0.107377	-0.166327	-0.1911	-0.119207	-0.242762	0.0282071	-0.0160239	0.0198298	-0.225817
1368275_at	Msmo1	140910	methylsterol monooxygenase 1	0.642128	-0.0353682	0.0627942	0.387853	-0.68542	-0.371237	0.178887	0.327415	0.458371	0.155456	0.214975	-0.0496125	1.20873	-0.0780133	0.321714	1.07324	0.00773442	0.465947	0.766841	0.525253	0.472575	1.11934	-0.113481	-0.0243438	0.781609	0.285023	0.532131	0.730903	0.071894	0.593824	0.0236965	-0.251617	0.123985	0.0328324	0.494629	0.0605614	0.200574	0.119062	-0.0697805	-0.101278	-0.119385	-0.406303	0.0554575	-0.00182281	0.243432	-0.0786734
1368276_at	Syp	24804	synaptophysin	-0.174167	0.0669756	0.105803	-0.22514	-0.00779033	-0.106321	-0.157026	-0.0185262	0.0326019	-0.0995104	0.023915	0.00547587	0.146721	-0.186873	-0.118114	0.170138	-0.034906	0.116018	-0.168728	-0.0392103	-0.340672	0.110875	0.0311499	0.0740643	-0.0362566	-0.134924	-0.183441	0.167531	0.163942	0.00912048	0.0625058	0.0558318	0.00611867	-0.0572429	-0.0892565	0.0286498	-0.0497409	0.0912714	-0.033817	-0.197572	0.0679231	-0.151286	-0.118383	-0.00221205	-0.333834	-0.0897933
1368278_at	Lgals2	171134	lectin, galactoside-binding, soluble, 2	0.0384293	-0.0007116	0.0375562	0.108897	-0.114883	0.0936231	-0.0953148	0.00569085	-0.0268584	-0.248903	-0.155225	0.0159191	-0.0749209	0.0835889	-0.289486	0.320048	-0.275233	0.104463	0.282042	0.532387	0.435226	0.302034	-0.247695	-0.00892867	0.183434	0.110391	0.217298	-0.00562079	0.000496918	-0.115467	1.24552	0.29204	0.492646	0.53992	0.212507	0.154743	0.816131	-0.00945789	0.804048	1.12982	0.300635	0.710306	-0.0685651	-0.163784	0.0146162	0.502771
1368279_at	Mllt3	114510	myeloid/lymphoid or mixed-lineage leukemia; translocated to, 3	-0.464163	0.0270655	0.162108	-0.725192	-0.144322	0.038329	0.0969779	0.19028	-0.000809726	-0.199613	0.252978	0.102991	-0.725597	-0.0793931	-0.126875	-0.148009	0.194679	0.132643	0.0656036	0.0747885	0.485923	-0.203594	-0.0529	-0.391431	-0.0704975	0.0120255	-0.250493	0.250802	-0.043502	0.270723	0.144075	0.00245517	-0.0522491	0.060665	-0.0203848	0.0496849	0.162744	-0.21252	-0.0680047	0.334391	0.31734	0.328045	-0.316147	-0.415423	-0.0592474	-0.09285
1368281_at	Dpep1	94199	dipeptidase 1 (renal)	-0.0421801	0.121598	-0.074984	-0.101996	0.157403	-0.0330926	0.00734673	0.11694	0.148305	-0.119357	0.0469963	-0.0895646	0.272317	-0.0700085	0.0891046	0.370955	0.193037	0.140929	0.0349199	0.17811	-0.0212177	0.135358	-0.0241508	0.0896548	0.116702	-0.0500638	-0.030788	-0.0146799	0.0692822	0.00430568	0.0685674	0.109017	0.0554176	-0.120448	0.0271998	0.0598994	0.1535	-0.0628403	-0.173867	0.316185	0.0704685	0.140179	-0.054206	0.134104	-0.00129334	0.278431
1368283_at	Ehhadh	171142	enoyl-CoA, hydratase/3-hydroxyacyl CoA dehydrogenase	2.02036	-0.0957753	0.211977	1.89303	0.0326727	0.0901646	1.36762	0.398691	0.386445	1.95922	0.304035	0.391795	0.463113	0.351287	-0.245588	0.454223	0.179588	0.178795	0.249214	0.18188	0.430304	0.237214	0.233845	0.300536	0.284811	0.277056	0.493057	0.0224428	0.0102295	0.131989	0.0192077	0.22915	0.267553	0.378138	0.137366	0.271947	0.418029	0.147544	-0.300934	0.340621	0.259379	0.574127	-0.223029	0.14545	0.147258	0.302643
1368284_at	Plvap	56765	plasmalemma vesicle associated protein	-1.0246	0.156362	-0.177498	-0.93003	-0.421941	-0.0291186	0.234828	0.054312	0.0601703	-0.285288	0.126144	0.0788873	0.1848	0.362835	0.495589	0.00873226	0.3065	0.245508	-0.42177	-0.0880336	-0.514444	-0.522365	0.103771	-0.0643483	-0.134673	-0.254433	-0.403089	-0.100282	0.121894	0.120139	0.0746226	-0.0955954	0.140877	0.00718759	-0.0649938	-0.0910253	-0.231949	-0.00160803	0.0845189	-0.302068	-0.0711178	0.0604043	-0.0560976	-0.331662	0.187106	0.445185
1368287_at	Chn1	84030	chimerin 1	-0.223214	-0.0503098	0.0532343	-0.014982	-0.101495	0.0520062	-0.175279	-0.0763626	0.0221225	-0.435927	-0.265475	0.0983628	-0.16811	0.290094	-0.0477455	0.0326767	0.000748229	-0.10253	-0.114459	-0.0735148	-0.0510444	-0.226077	0.222311	0.0297294	0.0357777	-0.0882928	-0.268285	0.240864	0.238997	0.282867	0.0927828	0.102264	-0.11049	0.464216	0.303304	0.00737463	-0.0850092	-0.100314	-0.0742374	-0.436181	-0.259913	-0.467741	-0.198468	0.111439	0.000780016	0.178859
1368289_at	Gc	24384	group specific component	-0.847241	-0.0352606	0.0106164	-1.12386	-0.0353023	-0.295401	-0.534322	0.0427655	-0.174276	-0.89248	-0.0597667	-0.173779	-0.440063	0.0663248	-0.297924	-0.638909	0.0802233	0.0293031	-0.0515345	-0.408334	-0.0625335	-0.392744	-0.46106	-0.377627	0.146399	0.126376	0.40162	-0.288326	-0.00853418	-0.164647	0.0121853	0.129337	0.304963	-0.410831	0.0561345	-0.202737	-0.286344	-0.345666	0.0869735	-0.247522	-0.0222968	0.123097	-0.345531	-0.224828	-0.189739	0.0216355
1368291_at	Birc2	60371	baculoviral IAP repeat-containing 2	-0.469912	0.236777	0.171051	-0.634889	0.225626	-0.0902957	0.0233726	-0.204053	0.275074	-0.102128	0.178879	0.327445	-0.282487	-0.128821	-0.25614	-0.532542	0.0473721	-0.0302886	-0.0418793	-0.0435557	-0.0384547	-0.30149	-0.144123	-0.234619	-0.392262	-0.613687	-0.0459913	-0.273803	-0.0748512	-0.237016	-0.14501	0.267003	0.208265	-0.10559	-0.141929	-0.0788514	0.15394	0.397652	0.386192	-0.301642	0.50026	0.0777472	0.170378	0.422454	0.0446409	0.0708433
1368292_at	Dnm1	140694	dynamin 1	-0.229241	-0.0668069	-0.116028	0.00218728	-0.100763	-0.0818786	0.0510319	0.0632251	0.0168926	0.0552298	0.000384228	0.0262174	0.281191	-0.0780988	-0.0386419	0.158045	-0.110224	-0.00697644	-0.18643	-0.0442438	-0.360399	0.106225	0.0429124	0.119205	-0.0670206	-0.121668	0.0178889	-0.0460753	0.144493	0.0042404	-0.151432	0.118555	-0.087848	-0.135834	0.0194581	-0.0654971	-0.07992	0.0490638	-0.175259	-0.0838265	0.157161	0.103965	-0.173224	-0.00276529	-0.198204	0.0625974
1368296_at	Slco2b1	140860	solute carrier organic anion transporter family, member 2b1	-0.10617	-0.0958383	-0.038099	-0.27084	-0.22823	-0.291612	0.300271	0.226674	-0.026268	0.0713825	-0.161586	0.0320973	0.0465734	0.471869	0.260608	-0.123135	-0.0280613	-0.0838232	0.292232	-0.0913126	0.133306	0.256809	-0.0307404	0.184571	-0.206159	-0.199877	0.000330387	-0.254574	-0.177826	-0.0633208	-0.390163	0.0916797	-0.0377208	-0.201403	-0.00872202	-0.129394	-0.581602	-0.115397	-0.471023	-0.708615	0.0598093	-0.222526	-0.207874	0.337005	-0.100838	-0.24245
1368303_at	Per2	63840	period circadian clock 2	-0.270593	0.200335	0.0231177	0.117244	0.220393	0.502938	-0.377708	0.156062	0.297177	0.391572	0.337538	0.293625	-0.961288	-0.160035	0.19366	-0.624211	0.0307653	0.546084	0.743956	0.44392	0.249458	0.540771	-0.514449	0.229811	-0.0919818	0.87967	0.416841	-0.58757	-0.671489	-0.289083	-0.373209	-0.517986	-0.654302	0.0517543	0.0697763	0.0866395	0.0223942	-0.202202	0.000717725	-0.391696	-0.3182	-0.316208	-0.521931	-0.622004	-0.616968	-0.666678
1368304_at	Fmo3	84493	flavin containing monooxygenase 3	-0.373361	-0.17277	0.0718135	-0.787393	-0.0442026	-0.246442	-0.413959	-0.212336	-0.215975	-0.379058	-0.438095	-0.283773	-0.1943	-0.226842	-0.10397	-0.256783	-0.132243	-0.0741965	-0.215813	-0.48531	0.049438	-0.27563	0.00548621	0.0043752	-0.262698	-0.412782	-0.113494	-0.0525272	0.115418	-0.149681	-0.218295	0.12967	0.397926	-0.254124	-0.188581	-0.106039	-0.468145	0.0273207	-0.433844	-0.495397	-0.119782	-0.313111	0.072439	0.251952	-0.0638158	-0.521142
1368305_at	Casp6	83584	caspase 6	0.230535	-0.102415	0.028227	0.0524882	0.0301063	-0.027826	0.213434	0.0320309	-0.074711	0.218554	-0.0212753	-0.0617337	0.180002	0.038607	0.179279	0.166176	0.184818	0.18158	0.118928	0.0960245	0.226387	0.289253	0.0169493	0.068057	0.13672	0.0968262	0.158039	-0.118298	0.12095	0.0842562	-0.0345874	0.0557044	-0.011515	-0.0736946	-0.0548849	-0.224386	-0.327403	-0.212025	-0.136174	-0.194051	0.0394745	-0.00708659	-0.165703	-0.102842	-0.0843825	-0.0624915
1368306_at	Grin2c	24411	glutamate receptor, ionotropic, N-methyl D-aspartate 2C	0.0210652	-0.0492489	-0.0217894	-0.186965	-0.0377156	-0.16398	0.0563302	0.00798451	0.109703	-0.0351066	-0.11827	-0.11735	0.334938	-0.184161	-0.033035	0.621622	-0.0410616	-0.107364	-0.111281	0.0088742	-0.181666	0.039943	-0.0327748	-0.0195521	0.0124873	0.000922796	0.0153424	0.328661	0.0682641	-0.0193412	-0.00327725	0.119831	0.215038	-0.074816	-0.124207	-0.0837052	0.0432392	0.225722	0.0216446	-0.057025	-0.0769328	-0.106974	-0.32869	0.111905	-0.185328	-0.318964
1368308_at	Myc	24577	myelocytomatosis oncogene	-0.113201	0.0589823	-0.567627	-0.381614	-0.968965	0.387168	-0.130192	-0.305735	0.118827	0.542581	-0.357147	-0.305241	1.20567	0.0612876	0.0424204	0.619686	-0.754676	-0.512668	0.0773348	0.321372	0.0528633	0.205056	-0.347238	0.302736	0.675432	0.193753	0.812378	0.0810325	0.417702	-0.756509	0.316451	0.772857	0.250588	0.742066	0.17768	-0.629448	-0.0395342	-0.541433	-0.0503088	1.4919	0.142457	1.29322	1.03754	0.00892868	0.543162	1.14255
1368309_at	Txnrd2	50551	thioredoxin reductase 2	-0.137186	-0.166453	-0.11419	0.0958894	0.0380283	0.0784793	0.108485	-0.265113	-0.251836	0.149401	0.205702	0.236867	-0.00231324	0.0488506	-0.0943053	-0.0616432	-0.0545339	-0.275842	0.205562	0.197418	0.165276	-0.0236285	-0.167847	-0.0888496	0.0302548	0.231009	0.0153052	0.119739	-0.0137082	0.105017	-0.0753646	0.0202352	-0.0272923	0.0375605	0.204637	0.224942	-0.0309265	0.0246203	-0.00780564	-0.253358	-0.146562	-0.0937254	-0.0518679	0.117095	0.00108292	-0.168031
1368311_at	Mgmt	25332	O-6-methylguanine-DNA methyltransferase	-0.0516426	0.242373	0.315085	-0.137947	0.357962	0.280932	-0.0585005	0.0534054	0.186643	-0.152389	0.160792	0.0186618	-0.220131	0.251863	0.117763	-0.194938	0.121541	-0.0838981	-0.445688	-0.0654471	-0.27061	-0.240413	0.185046	0.149378	-0.129625	-0.257687	-0.132615	-0.373241	-0.228021	-0.281993	0.314583	0.164031	0.192848	0.00841658	0.242679	0.193706	0.590946	0.0239246	0.748013	0.214645	-0.379907	-0.01685	-0.000303207	-0.0115328	0.518145	0.370424
1368314_at	Ggcx	81716	gamma-glutamyl carboxylase	0.264639	0.0903986	0.16851	0.4494	0.148299	0.191211	-0.0677431	-0.0182065	-0.0163715	0.14679	-0.0312005	0.0271594	-0.0813275	0.0806737	-0.122127	0.350587	0.145605	0.250189	0.302132	0.148008	0.205402	0.162682	-0.0316527	0.102612	-0.210001	0.0425209	-0.0832144	0.0220228	0.128359	0.0361529	0.209602	-0.00462604	0.279278	0.0724007	0.0151155	-0.0711828	0.298081	-0.0187172	0.168356	0.410831	-0.0900037	0.268282	0.169286	-0.0310502	0.253516	0.284273
1368316_at	Aqp8	29172	aquaporin 8	-0.816518	0.105803	0.106994	-1.01545	-0.00456549	0.0455878	0.102147	0.284576	0.0810538	-0.13761	0.059982	0.244094	-0.0250596	0.200589	0.280648	0.0345587	0.28248	0.124807	0.0598862	0.063422	0.0829579	-0.383347	-0.0327718	-0.00459823	0.323589	0.0933363	0.192152	0.446714	-0.031897	0.0667445	0.350458	-0.22682	-0.209771	0.32032	-0.0865253	0.00589423	-0.355034	-0.411673	-0.300336	-0.18972	-0.179935	-0.334398	-0.36219	-0.186329	-0.209425	-0.286093
1368317_at	Aqp7	29171	aquaporin 7	0.178555	0.0275753	-0.0101222	0.500241	-0.0139416	0.229064	0.171875	0.149776	0.243658	0.0703907	-0.113943	-0.124135	-0.0784596	-0.103276	-0.385726	0.269576	-0.0351969	-0.023132	-0.269937	0.14556	-0.0847537	0.103697	-0.291555	-0.169139	0.237619	-0.0991596	0.319266	0.369264	0.0611651	-0.00931424	1.38467	-0.0451477	0.76603	0.395562	0.139577	0.0673771	0.230651	0.0272856	0.483058	0.132712	-0.179642	0.0959467	-0.183888	0.191613	-0.363475	0.489749
1368321_at	Egr1	24330	early growth response 1	-1.14186	0.00941754	0.244403	-2.80678	-1.81036	-1.37823	-0.548052	0.0288597	-0.0243818	-1.03806	-0.76421	-0.609143	0.636682	1.61547	0.861842	-0.203521	0.906311	0.881133	-0.744109	0.318165	0.888331	-1.14307	0.221934	0.508408	0.0848681	0.926831	-0.234449	-0.388781	0.136486	0.173318	-0.905381	-0.769878	-1.20223	-0.600944	0.771136	-0.450222	-0.0820441	-1.83603	-0.393266	0.815544	-0.5371	0.762206	0.685556	-0.753928	0.0283963	2.24127
1368322_at	Sod3	25352	superoxide dismutase 3, extracellular	-0.0776819	0.179341	0.225417	-0.128161	0.00697492	0.00544909	0.160526	0.0331264	0.0377311	-0.104891	-0.0797658	-0.0119572	-0.0576327	0.0678519	0.171547	-0.0977582	-0.276138	-0.0782934	0.173368	0.0889109	0.0665554	-0.315895	0.0410806	0.22603	-0.104157	-0.0682347	-0.287635	-0.0253067	0.156904	-0.159923	-0.226065	-0.116329	-0.149249	-0.347843	0.0243584	-0.10477	-0.25762	-0.120638	-0.314513	-0.470104	-0.125083	-0.0521766	-0.346977	-0.280593	-0.257189	-0.182801
1368323_at	Tfpi	29436	tissue factor pathway inhibitor (lipoprotein-associated coagulation inhibitor)	0.132308	0.0463446	-0.115607	0.219653	-0.256776	-0.0189499	0.0301026	-0.132574	-0.0326383	-0.0700695	0.195338	-0.0544325	-0.44917	0.168202	-0.173151	0.0774071	0.0293865	0.15894	0.0129799	-0.170691	0.316159	-0.176284	-0.0180077	-0.0498344	0.190444	0.189775	0.29992	0.452963	0.309264	0.143869	0.605887	0.19144	0.465485	0.313821	0.160964	0.11078	0.318524	0.172546	0.379162	0.322154	-0.178543	0.136305	0.231462	0.179192	0.321311	0.340425
1368326_at	Eif2ak3	29702	eukaryotic translation initiation factor 2 alpha kinase 3	0.338391	-0.0910205	0.0237431	0.648538	0.101103	0.00623363	0.376946	-0.0324969	0.0757136	0.238843	0.0794488	0.0653437	0.0980013	0.16934	0.00922073	-0.0420011	-0.0519935	-0.158202	0.526927	0.238716	0.305726	0.218069	0.0623576	-0.163665	0.221635	-0.162223	-0.0311265	0.0295386	0.185551	0.0695672	0.209519	0.0781838	0.225385	0.171937	0.307096	0.153797	0.425147	0.0177731	0.0585391	0.0706142	0.0350126	0.0534769	-0.136788	-0.31629	0.0888674	0.091828
1368328_at	Gys2	25623	glycogen synthase 2	-0.0714354	-0.0103954	0.200728	0.0330489	-0.0710296	0.216274	-0.148441	-0.125672	-0.0420694	-0.479838	-0.298569	-0.303833	-0.788281	-0.0571493	-0.190784	-0.0860734	-0.0475543	0.198766	-0.144399	-0.00827323	0.362822	-0.357608	0.0327594	0.0732112	0.0902173	0.0706276	0.213102	0.341611	-0.0431513	0.062011	-0.120033	-0.0494265	0.174272	-0.25153	-0.030583	-0.0525008	0.193613	0.0770557	0.107219	0.272293	0.0705039	0.145322	0.212374	0.145648	0.122199	-0.147727
1368330_at	Aatf	114512	apoptosis antagonizing transcription factor	0.319468	-0.104383	-0.03575	0.106454	0.210737	0.0441875	-0.135523	4.36894e-05	-0.125378	0.421215	-0.0321921	0.228052	0.308948	-0.0157458	0.0690577	0.159357	0.101788	-0.222943	0.511604	0.183451	0.468985	0.166744	0.301108	0.0714039	0.364617	0.127979	0.0816031	0.198639	0.12037	0.143065	-0.0949949	-0.209946	-0.198432	-0.0562221	-0.244578	-0.160215	-0.170853	-0.268693	-0.256212	0.011605	-0.173574	-0.046008	0.085725	-0.0593975	0.10481	0.0359538
1368332_at	Gbp2	171164	guanylate binding protein 2, interferon-inducible	-0.49021	0.499908	0.0942589	-0.12409	-0.49199	0.140138	0.550399	0.289522	-0.119655	-0.618772	-0.303365	0.0481478	0.0616527	0.876238	0.522737	-0.358463	0.301675	0.133864	-0.0240163	-0.00943214	0.113738	-0.564329	0.109783	0.00646623	-0.0125461	-0.157496	-0.194571	-0.154087	-0.102904	-0.0252334	0.0320538	0.236809	0.136707	-0.244961	-0.411897	-0.294183	0.0844191	-0.0123447	0.437564	0.32032	0.330282	0.236123	1.4271	-0.35032	2.01415	0.257586
1368333_at	Umod	25128	uromodulin	-0.114493	0.0250449	-0.234761	0.0872239	0.0965569	-0.0128668	-0.069872	-0.00759947	0.0167884	-0.116462	-0.14071	-0.0299275	0.194063	-0.204545	-0.0864665	-0.0856072	-0.19555	0.0237284	-0.0385232	0.0777039	-0.298126	-0.0763944	-0.0960417	-0.0610803	-0.0396987	0.17124	-0.0461931	-0.0913804	0.00518793	0.114239	-0.0903868	0.0438014	0.115035	-0.313246	-0.100733	-0.138505	-0.235215	-0.043831	-0.0548119	-0.275959	0.0261133	-0.0214292	-0.0504113	0.118853	-0.060301	0.100049
1368334_at	Grb7	84427	growth factor receptor bound protein 7	0.323069	-0.377221	-0.0360615	0.593568	0.188846	0.317074	0.186745	0.0293694	0.0317536	0.166704	-0.113705	-0.104092	-0.17108	0.207737	0.270197	0.0389649	0.129872	0.157701	-0.0594233	0.0830184	0.0732544	-0.118148	-0.0430399	-0.0508765	-0.0964458	0.420875	0.0840202	-0.205027	-0.198313	0.10018	-0.268616	-0.24268	-0.203551	0.0649794	-0.0420148	-0.0480086	-0.134088	-0.064497	-0.0344946	-0.227529	-0.0409718	-0.0479805	-0.229654	-0.264176	-0.241188	0.111508
1368340_at	Ipmk	171458	inositol polyphosphate multikinase	-0.108003	-0.0182864	-0.0648328	-0.225236	0.0659841	0.167843	-0.0630325	0.171859	0.0802838	-0.131228	0.149525	0.0751406	-0.474178	-0.0230303	-0.0872962	-0.0108541	0.311675	0.197625	0.0458577	0.00421182	0.181288	-0.190825	-0.229792	-0.206396	-0.120558	-0.157207	-0.0242098	-0.112638	-0.0365466	-0.0773029	-0.19174	-0.0646503	-0.194739	0.00110815	0.0950264	-0.0333164	-0.00967557	-0.0367332	-0.127476	0.0919797	-0.0522265	0.0697902	-0.0785082	-0.212743	0.030506	0.146001
1368341_at	Polb	29240	polymerase (DNA directed), beta	-0.0362104	-0.020146	0.0189063	-0.0649866	0.021084	0.0201182	-0.0203908	-0.110744	0.0507841	0.10409	0.0191453	-0.0792956	0.163987	0.195617	0.0466665	0.017359	0.0530719	0.0200222	-0.0134384	-0.0166383	0.131474	-0.103552	0.0144	-0.0556753	0.126598	0.0985045	0.194341	0.0343847	0.0143423	0.00108046	0.165307	0.209134	0.243111	0.14282	-0.0256496	0.178786	0.360706	0.0420047	0.134493	0.247155	0.0157492	0.017942	0.0279139	-0.0513407	0.0684127	0.173988
1368346_at	B3galt4	171079	UDP-Gal:betaGlcNAc beta 1,3-galactosyltransferase, polypeptide 4	0.40074	-0.0570699	0.0273378	0.118513	0.150265	0.0595971	0.233283	0.289854	0.276066	0.0344539	-0.00316753	-0.111925	-0.00623889	-0.123378	0.131896	0.284414	0.0730031	0.320819	0.202777	0.0166875	0.180202	0.379681	-0.0337346	-0.00649774	0.226777	0.106942	0.190427	0.169737	0.385382	0.368996	0.104696	0.0714887	0.249708	0.289988	0.058515	0.0935066	0.101885	0.121357	-0.0180321	-0.203677	-0.34093	-0.0428759	0.00330204	-0.145169	0.00721913	0.0444279
1368353_at	Gfap	24387	glial fibrillary acidic protein	-0.265107	-0.0873515	-0.00148566	-0.0177087	-0.00218495	-0.113939	-0.105921	-0.00562964	-0.09067	-0.181695	0.114541	-0.201487	-0.15469	-0.0330459	-0.0652895	0.222515	-0.0306566	0.305209	-0.235019	-0.18438	-0.412742	0.137927	0.113093	0.239413	-0.0545854	0.06261	0.0570247	0.0163031	0.122446	0.0404505	-0.0885334	0.184069	-0.039351	-0.148096	-0.00597957	-0.0769653	-0.213917	0.0343369	-0.169555	-0.0270892	-0.193458	-0.00988756	0.24428	0.314312	0.18448	0.0272923
1368354_at	Gstt1	25260	glutathione S-transferase theta 1	-0.470957	-0.00846334	0.111139	-0.432151	-0.126892	0.0170215	-0.439418	-0.400488	-0.433191	-0.0176995	-0.0937425	0.140688	0.101329	-0.275068	-0.34919	0.423204	-0.204809	-0.324899	0.188732	0.221879	0.0343482	0.027381	-0.0950839	-0.0626106	0.194426	-0.286657	-0.0528557	0.217723	-0.265936	-0.00253887	0.498938	0.0653743	0.140394	0.465139	0.395967	0.4637	0.0556901	0.170302	0.164123	-0.0351397	0.0248688	0.0199615	-0.0217711	0.112098	0.0707646	-0.206486
1368355_at	Myo5b	25132	myosin Vb	0.826323	0.18154	0.1481	0.932232	-0.0152539	0.0751245	0.0110254	-0.0491976	0.126051	0.465687	0.17997	-0.104553	0.0448275	-0.0826143	-0.311482	0.310027	0.214916	0.0645913	0.225335	0.131315	0.168253	0.22102	0.170688	-0.0876129	-0.00478924	-0.0235239	-0.111622	-0.104804	0.00189246	0.0333455	-0.0648046	0.0554164	0.0331904	-0.0571849	-0.138305	-0.0709187	0.50899	-0.0417426	0.224623	0.685504	0.02137	0.385047	0.218095	-0.153926	0.0557835	0.58049
1368356_a_at	Erap1	80897	endoplasmic reticulum aminopeptidase 1	0.0505682	-0.0430906	-0.186344	0.199156	-0.0962242	0.10567	0.113841	-0.0113097	-0.0043728	0.0847549	0.0377366	-0.031427	0.298231	0.246391	0.284742	0.121546	0.0947469	0.0163241	-0.0293784	0.0527956	0.346955	0.104014	0.17817	0.184266	-0.170559	0.0260144	0.000187773	0.152011	-0.074606	-0.179598	-0.104064	0.291566	0.072972	-0.15234	-0.105486	-0.153825	0.0505029	-0.0308909	0.0865964	0.0938521	0.0823895	0.0207775	0.0117861	-0.253208	0.0501398	-0.0944085
1368357_at	Kcnh4	114032	potassium channel, voltage gated eag related subfamily H, member 4	0.0741696	0.161981	-0.00497326	-0.134843	-0.111951	-0.0980611	-0.0953848	0.036155	-0.0513721	-0.000772474	-0.0235279	-0.097613	0.185252	-0.296021	-0.117737	-0.153581	-0.227286	0.00898831	-0.318251	-0.0112624	-0.447536	-0.0795925	0.0746063	0.0318592	0.030203	0.00846265	0.00101555	-0.195769	-0.101394	-0.115667	0.0391436	-0.0629609	0.0463629	-0.0426339	0.0131165	0.113042	-0.313929	0.0654453	-0.265158	-0.0519137	0.000119789	-0.240938	-0.0477457	-0.00579937	-0.280835	-0.150197
1368361_a_at	Ptpn2	117063	protein tyrosine phosphatase, non-receptor type 2	0.416974	0.0311853	0.0237084	0.311264	0.000671032	-0.0227813	0.126369	0.0558643	0.0277044	0.073778	-0.00801599	-0.0646589	-0.221765	0.00983242	0.00895004	-0.060285	0.0803918	0.0493463	0.0732785	-0.0270004	0.238999	0.0616091	0.0671276	-0.00680628	-0.208615	-0.249733	-0.14609	0.126611	0.195023	0.12871	0.165354	0.107785	0.138278	0.0684417	-0.0882596	0.0462856	0.0835213	-0.027628	0.179763	-0.0148569	0.0471343	-0.0214474	0.0321761	-0.0817997	0.0836569	0.0776606
1368368_a_at	Lsr	64355	lipolysis stimulated lipoprotein receptor	0.240025	0.0431217	0.117391	0.134196	-0.00576957	0.121592	0.136087	0.147392	0.0302089	0.190112	0.0376001	0.0524012	-0.0238616	-0.0118896	0.300037	-0.214093	-0.00750617	0.00687024	0.130804	0.0420078	0.0851762	-0.122595	-0.159339	-0.166286	-0.515621	-0.229486	-0.131899	-0.184966	-0.0347269	-0.0349999	-0.421254	-0.0397463	-0.27051	-0.0328533	-0.171975	-0.093571	0.0282124	-0.0501064	-0.0432697	-0.0431126	-0.110274	0.0107467	0.0196498	-0.151448	0.0848603	-0.109139
1368370_at	Adcy4	54223	adenylate cyclase 4	0.0647318	-0.0307695	-0.0910824	0.205671	-0.31406	-0.130437	0.16523	-0.0345084	-0.067616	-0.144733	-0.0959993	0.0853052	-0.235355	-0.0515669	0.10312	-0.217334	-0.237629	0.0381409	0.159445	0.131187	0.168617	-0.198817	-0.214379	-0.168814	-0.00172471	-0.0518547	0.0756815	-0.313048	-0.138381	-0.0185693	0.211288	-0.0600203	0.0100738	-0.0396641	-0.173467	-0.204381	0.215991	0.139828	0.26634	0.548054	0.226697	0.579906	0.178688	-0.286312	0.35687	0.102248
1368372_at	Sts	24800	steroid sulfatase (microsomal), isozyme S	-0.876462	0.755749	0.475743	-0.130805	0.33687	0.471617	-0.33673	0.100796	0.349452	-0.0451653	0.289832	0.375023	-0.227383	-0.0120476	0.561701	0.658825	0.406699	-0.00324009	0.019349	0.400369	-0.0750512	-1.14023	-0.267693	-0.459094	-0.00411035	-0.553933	-0.373064	0.390183	-0.00759852	0.22491	-0.0645184	-0.382805	-0.662391	-0.198803	-0.313954	-0.178488	0.910264	0.174987	0.718569	1.50616	0.79704	1.07179	0.121755	-0.390298	0.0188523	0.188008
1368374_a_at	Ggt1	116568	gamma-glutamyltransferase 1	0.158312	-0.197092	-0.0712858	0.953997	-0.129073	-0.170755	0.164513	0.0625698	0.100926	0.195191	0.160905	-0.113892	0.202997	-0.279288	-0.0182783	0.530641	-0.124408	-0.00156105	0.0344105	0.223926	0.00725403	0.254284	-0.0717251	0.0140265	-0.0362593	0.165979	0.0242433	0.17608	0.0315676	-0.108682	-0.167734	-0.00161398	-0.19263	-0.0765246	0.0183553	0.0311261	0.126544	0.171464	-0.00656274	-0.0655594	0.0615807	0.000555385	0.090748	0.136317	0.0363611	0.442332
1368375_a_at	Il15	25670	interleukin 15	-0.0652157	-0.123257	-0.137064	-0.039686	-0.410305	-0.197506	-0.00458869	0.0792682	-0.0567021	0.172851	-0.104369	0.246079	0.359471	2.50711e-05	0.270069	0.0951934	0.0781804	-0.0182005	-0.152339	-0.0439043	0.0450917	0.0247446	-0.187655	0.289105	0.0751639	0.0885716	0.173824	-0.346352	-0.105599	-0.265881	0.0610043	-0.155316	0.0248113	-0.148142	-0.204094	-0.260177	-0.231928	-0.0470318	-0.0302566	-0.123097	-0.0200396	-0.112569	0.115388	0.282442	0.226049	0.119859
1368376_at	Nr0b2	117274	nuclear receptor subfamily 0, group B, member 2	0.547987	-2.37363	-1.07266	1.62203	0.340548	0.478159	1.36533	0.149427	0.222896	0.697103	0.274553	-0.835661	-0.4176	0.214889	0.196158	0.370649	-0.117041	-0.687064	0.289589	-1.35119	0.327957	0.441178	0.887744	-0.771468	0.497567	0.439637	-0.24012	0.883524	0.46669	0.61984	-0.289073	-0.571299	-0.476443	-0.394339	-0.0410039	0.521387	-0.0402606	-0.888303	0.196459	1.42663	0.219848	0.770254	-0.177246	-0.226651	-0.0284164	-0.0448079
1368378_at	Aldh1l1	64392	aldehyde dehydrogenase 1 family, member L1	-0.683218	-0.121421	-0.13464	-0.615905	-0.150166	-0.246903	-0.205029	0.211937	0.111497	-0.197975	0.0393848	0.037309	0.510236	-0.315024	-0.0287031	0.204942	-0.336878	-0.194157	-0.229066	0.014514	0.0326281	0.120864	0.105331	0.165217	0.773693	0.317191	0.579442	0.568596	0.0407188	0.256823	0.0939837	0.0657266	0.222076	0.34721	0.214019	0.218351	-0.717559	0.0354685	-0.394867	-0.793241	-0.114161	-0.355693	-0.532617	-0.174339	-0.479727	-0.396738
1368379_at	Scarb2	117106	scavenger receptor class B, member 2	0.408965	0.0349152	0.155077	0.089387	-0.0175323	0.166482	0.0618304	0.0418424	-0.120482	0.159838	0.0171109	-0.0786213	0.0075238	-0.0701663	-0.0214286	0.376456	0.137247	0.141588	0.22986	0.187653	0.299445	0.435627	-0.118054	-0.25713	-0.467302	-0.315444	-0.459102	-0.158586	-0.0936169	0.0126943	0.263763	0.223902	0.117095	-0.125986	-0.140247	-0.171122	0.638836	-0.0824456	0.431805	0.749526	0.0619111	0.411065	0.454562	-0.000629631	0.355553	0.315154
1368382_at	S100a3	114216	S100 calcium binding protein A3	-0.035572	-0.0368458	-0.150496	-0.0284201	0.0239506	-0.211302	-0.195623	-0.0382685	-0.099037	-0.154868	-0.110195	-0.0853838	0.154196	-0.258579	-0.129512	0.143822	0.102303	0.186696	-0.132923	-0.0384227	-0.215456	-0.0820676	0.0202937	-0.0162575	-0.0410851	-0.0116816	0.0631516	-0.13961	-0.00861986	0.0341418	-0.0822228	0.111026	-0.0926607	0.0184742	0.0131071	0.0336228	0.13113	0.121769	-0.131491	-0.198611	0.16671	-0.0783201	0.0194479	0.0951718	-0.191459	-0.000920475
1368385_a_at	Grb2	81504	growth factor receptor bound protein 2	-0.190401	-0.000649276	0.0533738	-0.135947	-0.00644077	-0.109042	0.0325741	0.0546091	0.113307	-0.118272	0.0324237	0.0505785	-0.201284	0.0937168	0.0192693	-0.287891	-0.056176	0.00307801	-0.0302778	-0.0112175	0.061448	-0.244953	0.0970142	0.0241786	0.167921	-0.0835869	0.107349	0.0527532	0.0438935	-0.00928787	0.15696	-0.0284517	0.086663	0.0173155	0.0132358	0.0844503	0.138511	0.0166088	0.0701466	-0.0246168	-0.133359	-0.057894	0.0283817	0.0499678	0.149738	0.0339067
1368387_at	Bdh1	117099	3-hydroxybutyrate dehydrogenase, type 1	-0.751909	-0.0151218	0.0439346	-0.479836	0.0825635	-0.0175961	0.134656	-0.0102309	0.040149	-0.020858	0.131562	0.0865035	-0.106771	0.167523	-0.143075	-0.376352	-0.0235053	-0.280383	-0.351603	-0.051658	0.0678149	-0.508298	0.0678753	0.0801784	-0.0651924	0.0342828	0.270747	-0.088494	0.122896	0.068882	0.0221634	0.0192505	0.249144	-0.0163776	0.128714	0.0864184	-0.381667	-0.211043	-0.205199	-0.331053	-0.0627779	-0.0558428	-0.293973	-0.0179402	-0.169602	-0.137054
1368389_at	Apba3	83611	amyloid beta (A4) precursor protein-binding, family A, member 3	0.126288	0.0915538	0.125916	-0.0594757	0.050173	0.0766318	0.132103	-0.0654267	0.0980158	0.0073624	0.0240461	0.0514676	-0.392467	-0.0117589	-0.0326547	-0.307862	0.0175773	-0.0159118	0.168206	0.200761	0.138566	-0.118507	-0.00476171	-0.221815	-0.0175687	-0.0393687	-0.165986	0.293139	0.0319817	0.196707	-0.030347	-0.0477301	0.161675	0.332094	0.272492	0.22925	0.152211	-0.115097	-0.119142	0.0332039	-0.203239	0.0366457	0.0144795	-0.100463	-0.101154	-0.0386473
1368390_at	Araf	64363	A-Raf proto-oncogene, serine/threonine kinase	0.0242354	0.0439541	-0.0765798	-0.195331	-0.00171766	0.0462974	0.0604132	-0.0164471	0.0146246	0.0916906	-0.0173779	0.0651199	-0.201938	-0.204231	0.104434	-0.268919	-0.269618	-0.237223	0.0328127	-0.00985431	0.041459	-0.124776	0.0360028	0.043247	-0.0474083	0.0610952	-0.0242888	-0.302458	-0.135601	-0.0812111	-0.222671	-0.0878796	-0.0810746	-0.21358	-0.0461101	0.0221518	0.294164	0.0649802	0.0924888	0.427906	-0.0429554	0.126584	0.243178	0.0723712	0.068719	0.470886
1368392_at	Slc7a1	25648	solute carrier family 7 (cationic amino acid transporter, y+ system), member 1	-0.222244	0.0910828	0.0417791	-0.176827	0.0321718	-0.0942019	-0.0689722	-0.0541347	0.00920896	-0.0468218	-0.0619808	-0.016577	0.397575	-0.0910334	0.00934836	0.11131	0.0499717	0.129294	-0.187338	-0.0769446	-0.381141	-0.0425018	-0.16537	0.0531321	-0.0743884	-0.106673	-0.182185	0.0805486	0.0488139	-0.00441293	-0.0579121	0.0365549	-0.0558015	-0.0749234	0.0449076	-0.114609	0.155158	0.204008	0.19878	0.342466	0.0940548	0.0491262	0.24454	0.0265976	-0.133294	0.444525
1368393_at	Cd93	84398	CD93 molecule	-0.095357	-0.27871	-0.360106	0.0261102	0.11877	0.0939306	-0.0133504	0.232594	0.0247746	-0.130662	0.072868	-0.2995	-0.174263	0.24122	-0.0310861	-0.106493	-0.106951	0.00607289	0.024924	-0.463919	-0.168246	-0.596649	-0.317394	0.292432	0.254464	0.0323095	0.150088	0.35439	0.452127	0.29512	0.205945	0.0137292	-0.190999	-0.102334	-0.246755	0.0578331	0.013944	-0.0885484	0.00243642	0.0594854	-0.124683	-0.122452	0.435019	0.22252	0.492283	-0.102606
1368395_at	Gpc3	25236	glypican 3	-0.410903	-0.0622714	0.00278759	-0.312088	-0.126082	-0.438634	0.107939	0.231377	0.0202483	-0.0056724	0.299596	0.00136772	0.137217	-0.139276	0.0611535	0.0205065	0.0391269	-0.0821339	0.425956	0.303647	0.103008	0.142704	0.0715793	0.250499	0.079623	-0.188534	-0.0451535	-0.164929	0.00146819	-0.0918058	-0.0488298	0.148577	-0.179378	-0.186496	0.16543	0.0674797	0.151355	0.20003	0.141784	-0.0520777	-0.0968527	0.327258	-0.485138	-0.144797	-0.149046	0.250317
1368399_a_at	Cpq	58952	carboxypeptidase Q	-0.731716	0.00972724	0.0651748	-0.982612	-0.0196497	-0.206768	-0.278819	-0.133561	-0.127086	-0.336501	0.0147106	-0.113215	-0.406423	0.106541	-0.104535	-0.619469	-0.164341	-0.329011	-0.0815051	-0.189296	0.0481142	-0.274212	-0.0127083	0.0338177	-0.272504	-0.0845134	-0.171844	-0.143579	0.0492045	-0.0333933	-0.64594	-0.1709	-0.293613	-0.321341	0.0676422	0.046501	-1.09293	-0.138351	-0.411187	-1.0882	0.02786	-0.317044	-0.294996	-0.0424848	-0.357535	-0.597023
1368400_at	Timm8a1	84383	translocase of inner mitochondrial membrane 8 homolog A1 (yeast)	0.181151	-0.0383559	0.0336164	0.0120218	-0.0204803	0.0579599	-0.0310656	-0.0743725	-0.0509132	0.188079	-0.0456976	-0.0415561	-0.187088	-0.00224191	-0.00558703	0.258891	0.276366	0.353447	0.12553	0.177682	0.402175	0.111299	-0.109455	-0.178064	0.23578	-0.208482	0.0587801	0.157762	0.0579301	0.171568	0.2124	-0.118061	-0.192277	0.326552	-0.0938051	-0.00472769	0.541657	0.0486825	0.278181	0.404862	0.0509516	0.102067	-0.0551791	-0.0590909	0.0402836	0.15732
1368403_at	Rbl2	81758	retinoblastoma-like 2	-0.0649158	-0.0970885	-0.00230003	-0.32215	-0.0438932	-0.081068	0.0563728	0.117454	-0.0421619	-0.247509	-0.0888827	-0.0148457	-0.34447	-0.0113741	-0.0191505	-0.296821	-0.0148955	-0.0510704	0.115778	-0.0239357	0.30138	-0.0762611	0.06151	0.00861572	-0.0981281	0.0281825	0.00346194	-0.093536	-0.014543	0.0235449	-0.266614	-0.0906689	-0.153373	-0.196613	-0.106961	-0.0954604	-0.260231	0.00443755	-0.15405	-0.27877	-0.183939	-0.212995	0.00632288	-0.00949089	0.0555225	-0.123456
1368404_at	Dbn1	81653	drebrin 1	-0.582876	-0.0728854	-0.0739323	-0.153142	0.0385546	0.147525	-0.253824	-0.142451	-0.21681	-0.29593	0.157377	-0.0391791	-0.0671535	-0.349271	0.00572687	-0.0944838	-0.186327	0.0183926	0.149123	0.12456	-0.00455321	-0.227454	0.144559	0.0694301	0.0832942	0.0196445	0.0780674	0.0604988	0.0701762	-0.0243417	-0.135266	0.057401	-0.24784	0.0725084	-0.039547	-0.071365	-0.0359001	0.0477621	0.110718	0.0590081	-0.0101528	0.435768	0.0608498	-0.180617	-0.173606	0.122852
1368405_at	Rala	81757	v-ral simian leukemia viral oncogene homolog A (ras related)	0.164434	0.163593	0.130918	0.123758	0.0674676	0.100967	0.0388839	-0.0410239	0.0380407	-0.0229165	-0.0675496	0.0148229	-0.0431857	-0.0959799	-0.105777	0.0735331	-0.0592081	-0.127787	0.155856	0.172265	0.275003	-0.131015	-0.0453441	-0.088723	0.240783	0.0520106	0.000198639	0.126093	-0.192101	0.00636219	0.207014	-0.0597246	-0.0213315	0.0163763	-0.116447	-0.0336553	0.360766	0.0479013	0.491513	0.690839	0.208995	0.45707	0.2692	0.106188	0.272966	0.322054
1368407_at	Hpse	64537	heparanase	0.0795291	0.17235	-0.189707	-0.286763	-0.242467	-0.30891	-0.532138	-0.483818	-0.2878	-0.0788013	0.370991	0.26302	-0.449589	0.195457	-0.273257	-0.046473	-0.0541356	-0.149408	-0.209317	-0.10038	0.225032	0.0165474	-0.00451947	0.10066	-0.0304213	0.0556503	0.0375907	-0.288587	0.0202189	-0.280466	-0.162623	0.0397048	0.122554	-0.0814622	-0.261194	0.0185927	-0.0976781	0.10829	0.169384	-0.0465942	-0.070169	0.0582304	-0.280528	-0.47723	-0.253256	0.100845
1368408_at	Grk5	59075	G protein-coupled receptor kinase 5	0.439871	0.211293	-0.138347	0.433442	-0.28222	-0.00663221	-0.173377	-0.233335	-0.118715	-0.255522	-0.0358104	-0.0801369	0.314461	0.2257	-0.0524476	0.440195	-0.194436	0.0583689	0.277521	0.259462	0.156793	0.549459	0.044171	-0.183816	0.0687212	-0.117259	-0.174865	-0.122853	-0.310442	-0.181748	0.358427	-0.0977666	0.0327372	-0.227104	-0.0606348	-0.148751	0.141779	0.197473	0.33599	0.55793	0.301071	0.553921	-0.0308466	-0.126249	-0.0292177	0.340137
1368409_at	Gstt2	29487	glutathione S-transferase, theta 2	-0.301349	-0.356669	-0.168263	-0.0182567	-0.0764497	0.107321	0.241918	0.178158	0.000265838	-0.13033	-0.103247	-0.105126	0.42968	-0.147017	-0.0612792	0.0901442	0.115955	-0.0766289	-0.0515555	0.0480228	0.0456392	0.298568	0.115544	0.135392	0.500182	0.565071	0.500159	-0.24362	-0.0193234	0.00553762	-0.133174	0.12221	0.140378	-0.128648	-0.103018	-0.208226	-0.108218	0.329412	-0.193294	-0.196548	0.11217	0.0545353	-0.165927	-0.0580206	-0.000500822	-0.136221
1368410_at	Mpg	24561	N-methylpurine-DNA glycosylase	0.429707	0.0533855	-0.12916	0.195864	-0.00393205	-0.0323594	0.0569002	0.175401	0.0525202	0.199412	-0.13154	0.0169932	0.0152423	0.0784286	0.0584587	0.0730389	0.238822	-0.00175061	0.0176903	-0.0121226	0.125984	0.100858	-0.083667	0.00837296	0.028561	0.109776	-0.00242715	-0.230175	-0.03421	-0.0848031	-0.37359	-0.0471255	-0.0616031	0.188082	0.127201	0.113698	-0.172575	-0.331893	-0.0757169	0.183824	-0.0680466	0.0614703	0.100201	-0.0226354	0.20201	0.150282
1368413_at	Aoc1	65029	amine oxidase, copper containing 1	0.133672	0.234153	0.156457	0.287985	0.149855	0.363501	-0.0413222	-0.262165	-0.153653	-0.188424	-0.417082	-0.250464	0.0207209	-0.100404	-0.0706625	0.172922	0.160837	0.0259765	-0.126131	0.0854976	-0.145365	-0.0451733	-0.0751421	-0.0254126	-0.0310003	0.00560188	0.0416988	-0.10323	0.0101423	-0.0194478	-0.105307	0.0427943	-0.154182	-0.0817157	-0.0640088	0.321724	0.0748151	0.0715529	-0.0454273	0.108962	-0.158758	0.104774	-0.0545864	0.108085	0.0611867	0.126552
1368419_at	Cp	24268	ceruloplasmin (ferroxidase)	0.554026	-0.0360133	0.0708508	0.178769	0.0972623	-0.0298155	0.193971	0.0665988	-0.0450599	0.388235	-0.00480242	-0.0929971	-0.0913032	0.206139	-0.216305	0.215693	0.199074	-0.0248815	0.472778	-0.0557582	0.247815	0.829619	-0.0254685	0.2585	-0.270827	0.116492	0.0723675	-0.346162	-0.0638377	-0.199297	-0.188388	-0.195099	-0.0508008	-0.216746	0.00252363	-0.136165	-0.360474	-0.209846	-0.162541	-0.11176	0.20045	-0.0386414	-0.155258	-0.0152621	-0.211017	-0.237977
1368422_at	Meox2	29279	mesenchyme homeobox 2	0.66468	0.0621918	-0.410696	-0.15766	-0.316657	-0.368558	-0.618061	-0.464342	-0.518303	0.0952326	0.351124	0.305805	1.16623	0.919634	-0.0304385	0.369713	-0.107962	0.20406	0.479757	0.0347446	-0.118105	1.1441	0.37139	-0.114648	0.305152	0.1653	0.622452	0.315935	0.439422	-0.106766	-0.558654	0.303949	-0.477628	0.33928	0.156976	0.076811	-1.17988	-0.336773	-0.355537	-1.132	-0.249419	-0.682783	0.0263717	-0.281636	-0.386423	0.431955
1368423_at	Retnla	81712	resistin like alpha	-0.164568	-0.0749363	0.0587195	-0.121849	-0.0192785	-0.161263	-0.0428151	0.0161638	0.115948	-0.129923	-0.150981	0.0100628	0.385863	0.0392144	-0.0318399	0.0588396	-0.177649	-0.102878	0.0872598	0.0209276	-0.0446503	0.0457601	0.0756294	0.0175217	-0.0689658	-0.0778496	0.0579535	0.220716	0.138545	0.294635	0.0681169	0.0743919	0.200746	0.021876	0.224476	0.0432118	-0.189316	-0.118995	-0.148337	-0.200431	0.105468	-0.0258979	0.151083	0.114766	-0.0802589	0.150681
1368424_at	Ikbkb	84351	inhibitor of kappa light polypeptide gene enhancer in B-cells, kinase beta	0.0966697	-0.148061	-0.103461	0.226793	0.0623894	0.123653	0.130434	-0.219332	-0.185646	0.324687	0.182667	0.0461511	-0.243788	0.0401069	-0.0120562	-0.0683518	-0.25041	-0.089731	0.187599	-0.0772838	0.350519	0.200624	0.0546104	-0.0325744	-0.0714779	-0.00113299	0.00709218	-0.0970151	-0.131796	-0.134084	0.0607914	-0.085752	0.168082	-0.0324119	0.0821938	0.124634	0.266265	-0.107269	0.138818	0.498991	0.0107368	0.285005	0.317098	-0.0150055	0.410757	0.331237
1368428_at	Xpnpep2	117522	X-prolyl aminopeptidase (aminopeptidase P) 2, membrane-bound	0.220631	-0.255849	-0.0543978	0.246728	0.0519151	0.112066	0.373801	0.21514	0.325878	0.520407	0.15199	0.309425	-0.0904891	0.210586	0.240987	-0.507335	0.0388725	-0.0906058	0.620287	0.34109	0.349096	0.0483649	0.168293	0.251996	-0.46153	0.197787	-0.180283	-0.832426	-0.0781119	-0.271811	-0.896505	-0.31226	-0.446895	-0.445754	0.0298246	-0.358821	-0.415055	0.28354	0.0598533	-0.80735	-0.262283	-0.360764	-0.753082	0.0318182	-0.438881	0.105329
1368430_at	Lgmn	63865	legumain	0.164875	-0.00766266	-0.00487409	0.392282	-0.0983407	-0.0515138	0.189295	0.00837922	0.0204859	-0.0407772	0.027587	-0.00629179	-0.225034	0.225744	0.237901	-0.118507	0.0844835	0.0452995	-0.171623	0.0153467	0.0914626	-0.0044172	-0.0287144	0.0606801	0.0236629	0.0898509	0.0299742	-0.0762327	0.0565582	0.049208	0.496778	-0.0763501	0.112699	0.00717538	-0.0224946	-0.0296372	0.614309	0.143973	0.580067	0.618609	0.0276586	0.535974	0.326003	-0.212367	0.389717	0.333551
1368433_at	Sacm1l	116482	SAC1 suppressor of actin mutations 1-like (yeast)	0.00671559	-0.0476079	-0.0187374	0.00818054	-0.0182908	0.00122715	-0.065699	0.0437146	0.0197802	-0.124976	-0.0626094	-0.0280833	-0.017022	-0.0792218	-0.091348	-0.0768473	-0.110728	0.0429155	0.00551865	0.0157081	0.105484	0.145138	-0.0451717	-0.00695537	-0.084569	-0.0166678	0.00178464	0.0190259	-0.0319037	0.0340785	-0.03927	-0.0727906	-0.048504	-0.0310973	-0.0435428	-0.0156521	0.0472738	-0.0424886	-0.00395551	-0.0343365	0.000941635	-0.0376677	-0.0388735	-0.0172416	0.00972422	-0.0413549
1368434_at	Nat1	116631	N-acetyltransferase 1 (arylamine N-acetyltransferase)	-0.18161	0.258765	0.0405843	-0.0591285	0.155294	0.0227892	-0.381148	-0.035961	0.00154963	-0.450372	-0.0558106	-0.034557	-1.12027	0.0958625	-0.103967	-0.282009	0.0889544	-0.0900517	0.373404	-0.0486014	0.255048	-0.389117	-0.156978	-0.329441	-0.116788	0.168618	0.102814	0.2138	0.0342661	0.113745	-0.476703	-0.188465	-0.305057	-0.0187614	-0.283989	-0.130633	-0.2195	-0.0713223	-0.309229	-0.303607	-0.132301	-0.516809	0.088857	-0.0408899	-0.107574	-0.324673
1368435_at	Cyp8b1	81924	cytochrome P450, family 8, subfamily b, polypeptide 1	-1.48268	-0.466614	-0.276755	-0.87405	-0.100775	-0.430181	-0.356508	0.400514	-0.0121922	-0.487709	0.0435541	-0.101507	0.304013	0.302512	0.760275	-0.792468	-0.285109	-0.214886	-0.960079	-0.540038	0.1478	-0.354767	0.132757	-0.01513	0.99195	0.175096	0.615414	0.276369	0.197515	0.339827	0.81194	-0.697869	0.358047	0.159855	0.325215	-0.265383	-0.495713	-0.201433	-0.4218	-1.21317	-0.74073	-0.906017	-0.454159	0.275073	-0.638088	-0.462094
1368440_at	Slc3a1	29484	solute carrier family 3 (amino acid transporter heavy chain), member 1	-0.617606	0.149491	-0.304677	-0.144236	0.0961247	-0.133416	-0.207543	0.124539	-0.114861	-0.0197734	0.0983527	0.0405093	-0.389288	-0.0334313	-0.15714	-0.439973	-0.325207	-0.157442	-0.081071	-0.0776504	0.156197	-0.0439832	0.0445322	0.0857843	0.447734	0.404466	0.469065	0.233019	0.0584584	0.143047	0.50522	0.067188	0.197745	-0.209697	0.0999506	-0.0933808	-0.159283	0.100312	-0.0907004	0.104097	0.0524944	0.140568	0.022912	0.150862	0.204663	0.107435
1368441_at	Msln	60333	mesothelin	-0.198836	-0.0833817	-0.222412	-0.134339	-0.0252802	-0.144123	-0.27217	0.2507	-0.123109	0.372675	0.5306	0.266867	0.168662	-0.554577	0.174912	-0.190298	-0.237109	-0.33398	-0.0663146	0.188059	0.0372339	-0.165928	-0.0623485	0.0487639	0.262383	0.0228876	-0.0745041	0.0269498	-0.0653454	0.00519924	-0.07479	-0.265699	-0.220961	-0.118434	0.133352	0.0450727	0.111298	0.0231038	-0.0839899	-0.035336	0.245934	0.0606074	-0.341465	-0.0474605	-0.302222	0.0132387
1368448_at	Ltbp2	59106	latent transforming growth factor beta binding protein 2	-0.301297	-0.0475645	-0.00444715	-0.329984	-0.0203519	-0.181124	0.122861	0.0392133	-0.0736279	0.0440471	0.0635539	0.0187538	0.136091	-0.335536	-0.0250173	-0.162361	-0.189256	-0.0894123	-0.194389	0.0341322	-0.228197	-0.0387839	0.190594	0.0760117	-0.0898482	-0.0276993	0.0317482	-0.0614945	-0.0525815	-0.0556999	0.0388447	0.072768	0.0132138	-0.0158818	-0.0638378	-0.00401174	-0.181465	-0.061756	-0.176584	0.0247836	-0.0273908	0.019742	-0.0173044	0.0499081	-0.201785	-0.0840042
1368452_at	Abcc6	81642	ATP-binding cassette, subfamily C (CFTR/MRP), member 6	-0.609967	-0.219191	-0.173292	-0.661821	-0.0308849	-0.115384	-0.138878	-0.0354585	-0.0131442	-0.283406	0.0383095	0.11922	-0.195012	-0.131432	0.0969712	-0.567205	-0.154982	-0.198486	-0.430007	-0.168789	-0.209857	-0.495287	-0.0584746	-0.0882584	-0.159381	0.104914	0.0364919	-0.248604	0.0235326	-0.11416	-0.352082	-0.0350858	-0.139708	-0.325634	-0.0238586	-0.17825	-0.500303	-0.308903	-0.338123	-0.668192	-0.32724	-0.326629	-0.485341	-0.022375	-0.517273	-0.400573
1368453_at	Fads2	83512	fatty acid desaturase 2	1.31347	0.0653191	-0.0631484	1.52322	-0.280439	0.189797	0.383438	0.049747	0.229782	0.361249	-0.0556351	-0.125103	-0.0539538	0.139463	-0.300647	-0.252738	0.188474	0.158688	-0.276167	0.355897	0.124495	-0.860414	-0.233288	-0.284756	0.199452	0.379471	0.367384	-0.229758	0.0890019	0.0630381	0.651766	0.266496	0.529223	0.321792	0.476204	0.277849	0.150333	0.0818466	0.132355	-0.369226	-0.428328	-0.237715	0.174369	0.11175	0.328331	0.221152
1368455_at	Nkg7	171062	natural killer cell granule protein 7	-0.396284	-0.0848959	-0.105472	-0.209468	-0.0980504	0.0130639	0.0546532	-0.130922	-0.206361	-0.237852	-0.0828062	-0.198155	0.0248117	-0.0807924	0.0444554	-0.172838	0.0766838	0.12198	-0.183448	-0.15335	-0.507309	-0.101136	0.204152	0.0332292	-0.0414548	-0.13064	-0.167992	-0.0535349	-0.0573783	0.0785495	0.159615	-0.0879583	-0.213084	-0.0416454	-0.123506	-0.0645058	-0.160125	-0.0729591	-0.0126771	-0.0763363	0.133222	-0.0138892	0.103546	0.0833802	0.502644	0.216332
1368458_at	Cyp7a1	25428	cytochrome P450, family 7, subfamily a, polypeptide 1	-0.330342	-1.0331	-0.48109	1.07421	-0.628712	0.374656	0.131408	0.35084	0.0842247	-0.462633	-0.492675	-0.378191	0.720876	0.296399	1.10602	-0.0876074	-0.619172	-0.100805	-1.06276	0.186388	0.331959	-1.51969	0.346381	-0.802474	1.04386	0.938492	0.44762	0.576712	0.189801	0.851898	-0.295231	-1.00359	-0.87411	0.6225	0.329175	0.866883	2.44325	0.811104	0.458747	1.93683	-0.0388838	-0.190227	-0.067095	0.807361	-0.167199	0.130588
1368460_at	Slc2a5	65197	solute carrier family 2 (facilitated glucose/fructose transporter), member 5	-1.06852	-0.223019	-0.262843	-0.33956	-0.11184	-0.363259	-1.30313	0.18123	-0.142738	-1.07929	0.194157	-0.111615	-0.0616649	-0.0847053	-0.00295701	0.344273	0.380344	0.221413	0.51195	0.193336	0.301252	0.453918	-0.114131	0.202713	-0.445682	-0.0308211	-0.277212	-0.783617	-0.566767	-0.465805	-0.0176347	-0.0861684	-0.328039	-0.692048	-0.428667	-0.603982	-0.476725	-0.0503055	-0.148775	-0.583635	-0.115565	-0.321294	-0.116505	-0.103938	-0.157378	-0.437718
1368463_at	Vegfc	114111	vascular endothelial growth factor C	-0.117059	0.0121156	-0.0814566	-0.0898055	0.0956689	0.15115	-0.223719	-0.108816	-0.197618	-0.132697	-0.155046	-0.0550317	-0.0586022	-0.337006	-0.0256552	0.0016096	-0.133162	0.0720543	0.117086	0.100674	0.18394	0.19879	0.0569745	-0.0452248	-0.0621629	0.140496	0.0482621	-0.0442307	-0.0680946	-0.146	-0.0935664	-0.0263808	-0.194166	-0.258232	-0.237582	-0.331648	0.0294031	-0.0340921	0.240466	0.158381	-0.012891	0.112476	-0.11477	-0.185913	-0.0218015	0.00668343
1368464_at	Clec10a	64195	C-type lectin domain family 10, member A	0.229836	-0.032808	0.0844968	0.109154	0.139819	0.288577	0.0791642	-0.227283	-0.0212428	-0.236286	-0.0620851	-0.118831	0.222478	0.221288	0.237339	-0.187416	-0.0205996	-0.194974	0.059102	-0.100155	0.0504181	-0.0584761	-0.199182	-0.00458549	0.0638133	0.249077	0.195336	0.0342453	-0.0400868	-0.0698758	0.320863	0.0735272	-0.099968	0.0176071	0.0948535	0.242085	0.312268	0.230851	0.262927	0.144374	0.0932134	0.0532428	0.0784801	-0.184132	0.404545	0.167718
1368470_at	Ggh	25455	gamma-glutamyl hydrolase (conjugase, folylpolygammaglutamyl hydrolase)	-0.0843918	0.144602	-0.0429493	-0.419882	-0.0277233	-0.00639784	-0.117105	-0.129799	-0.0553613	-0.102682	0.120389	0.135228	-0.62746	0.0569149	-0.406142	-0.171726	0.150685	0.0136247	-0.0489302	-0.171505	0.187654	0.0645628	-0.249729	-0.109753	-0.106118	-0.124475	-0.16032	-0.179245	-0.0713295	-0.0198255	0.251962	-0.171669	-0.144243	0.0246914	0.00825603	-0.134097	0.119938	-0.0971439	0.314753	0.14117	0.165484	0.172459	-0.0355065	0.0162146	0.124415	0.0888948
1368473_at	Gja5	50563	gap junction protein, alpha 5	0.281844	0.030147	0.0292946	0.113356	-0.0280063	0.207989	-0.00131374	-0.0411059	-0.162597	-0.0551498	-0.0857081	0.0776083	0.211053	0.0661334	0.0531856	0.21164	0.142928	0.00469258	-0.0140221	0.212237	0.0199371	0.220085	-0.0912571	0.0711714	0.0255427	0.142426	0.0183631	-0.0295303	-0.00723362	0.0747876	0.0156117	0.0166721	-0.127642	-0.14489	-0.0521807	-0.0844913	-0.187038	-0.0897764	-0.144828	-0.161406	0.0562861	-0.218887	-0.0217147	0.00237175	-0.0781143	0.25054
1368476_at	Nr3c2	25672	nuclear receptor subfamily 3, group C, member 2	-0.119679	0.175664	0.103348	-0.0240999	0.210426	0.242326	-0.107722	-0.211419	-0.0672278	0.200414	0.188854	0.0297912	-0.107662	0.231419	0.0274803	0.0251534	0.187999	0.13032	0.415711	-0.00460967	0.241183	0.0287557	-0.174935	-0.378673	-0.149856	-0.295982	-0.293053	-0.169608	-0.159754	0.0524631	0.106741	0.1827	0.204601	-0.243356	-0.0950671	0.0112181	-0.593586	-0.312095	-0.506488	-0.185249	-0.00167865	-0.356884	-0.318586	0.0577868	-0.0590863	-0.459383
1368482_at	Bcl2a1	170929	BCL2-related protein A1	-0.698239	0.116381	-0.155164	-0.441977	-0.311596	0.052105	0.225528	0.194922	-0.0926184	-0.582759	-0.300388	-0.176316	0.322558	0.667391	0.703345	-0.186263	0.272322	-0.00812835	-0.396462	0.00773168	-0.238815	-0.39826	0.252054	-0.0127371	0.518681	0.369435	0.217706	-0.0373295	-0.16734	-0.0431923	0.371681	0.180195	-0.153126	0.0389736	-0.25621	-0.0922375	0.761845	0.133587	1.09047	0.790249	0.44231	0.546251	1.06913	-0.455789	1.80651	0.919332
1368484_at	Abcb9	63886	ATP-binding cassette, subfamily B (MDR/TAP), member 9	-0.42616	-0.158883	-0.21042	-0.261312	-0.230547	-0.246048	0.161189	0.273093	-0.21709	-0.104156	-0.0315865	0.151801	0.241064	0.448092	0.316952	0.382916	-0.238065	-0.114158	-0.420102	0.192418	-0.0391126	-0.334405	-0.134454	0.391288	0.718933	0.839979	0.591102	0.53948	0.274916	0.185616	-0.355872	-0.612708	-0.108797	0.332243	0.234291	0.228447	0.366071	0.232008	-0.094651	0.32091	-0.0677483	0.144197	-0.344998	-0.309433	-0.172386	0.399062
1368486_at	Irs3	84021	insulin receptor substrate 3	1.60297	-0.420407	-0.417473	1.58545	-0.121563	0.339591	0.926364	1.0742	0.575449	0.644834	0.559901	0.424474	-0.611474	0.488839	0.329811	-0.511617	0.515818	0.0825731	0.557512	0.703378	0.330201	-0.696922	-0.0273305	0.00643288	0.385035	0.574546	0.349348	-0.578311	-0.435966	-0.0471984	-0.909421	-0.142282	-0.396972	-0.0655453	0.217714	0.454821	0.044164	0.254063	-0.29078	-0.485562	-0.699906	-0.854641	-0.256736	-0.272846	-0.272396	-0.531946
1368488_at	Nfil3	114519	nuclear factor, interleukin 3 regulated	-0.167424	0.119404	0.311801	-0.372621	-0.016123	0.223385	-0.0455551	-0.00878424	-0.125411	-0.0389656	0.0157293	0.145218	0.148413	-0.157578	0.180934	-0.245251	-0.181978	0.0437312	0.0647123	0.355082	0.0197828	0.0687532	-0.119358	0.311261	-0.168934	0.0889557	0.0610641	-0.48347	-0.269297	-0.212284	-0.288285	0.0189294	-0.122316	-0.192978	0.0424604	-0.327146	-0.252413	0.124408	0.0405054	-0.551775	-0.0124714	-0.212706	0.136643	0.0173822	0.0370629	0.124105
1368489_at	Fosl1	25445	fos-like antigen 1	-0.166797	-0.0952359	-0.136226	-0.124815	0.150222	-0.130652	-0.158873	-0.0631398	-0.0351198	0.0501867	-0.0657593	0.0697657	0.147757	0.137526	-0.000420995	-0.00450203	-0.109647	-0.0464081	-0.224524	-0.0316697	-0.328349	0.0455723	0.180433	0.117678	-0.0642901	0.0260349	-0.0184042	0.0413394	-0.128076	-0.0775697	-0.092974	-0.00402683	0.0752867	-0.231097	0.0460214	-0.0713366	-0.0170089	0.176897	0.0301246	-0.171327	-0.0622393	-0.11325	0.187796	0.0261687	-0.109983	0.0772562
1368490_at	Cd14	60350	CD14 molecule	0.60884	-0.105352	0.103346	1.01839	0.497225	0.43756	0.31567	0.0871718	0.0247887	0.360195	-0.143806	-0.333396	0.688138	-0.402058	-0.318739	1.1691	-0.0228612	-0.0118896	0.693204	-0.0683604	0.271068	0.947071	0.464914	0.186543	0.40026	0.320996	0.00434545	0.551275	-0.0294645	0.0978908	-0.486056	0.00338954	0.382514	0.24155	0.377701	0.171443	-0.116911	0.289708	-0.0577719	0.480451	-0.22985	0.128445	0.120083	-0.0651828	0.341779	-0.0966717
1368491_at	Dnase2b	59296	deoxyribonuclease II beta	-0.520719	-0.066686	-0.26414	-0.232249	0.248625	0.368156	0.115645	0.0937499	-0.0354496	-0.396832	-0.441856	-0.109982	-0.0555584	-0.269073	0.369325	-0.00929903	0.739248	0.767481	0.117038	-0.184789	0.13401	0.229832	0.142365	-0.134966	0.101718	0.069846	0.166966	0.132966	-0.0840327	0.023745	0.0572922	-0.116691	0.174645	0.183051	0.0260725	0.085106	0.180668	-0.185509	0.120504	0.791921	-0.0573722	0.235527	0.764278	0.301352	0.648002	0.452081
1368492_at	Hpgds	58962	hematopoietic prostaglandin D synthase	0.0859061	0.298705	0.173259	0.395541	0.103469	0.180659	0.415386	-0.0159424	0.0780546	-0.0593962	-0.0418717	-0.0324213	-0.125696	0.332328	0.189427	-0.0459662	0.193168	0.173841	-0.0267438	0.279378	-0.0325507	-0.231308	0.22927	0.297288	-0.132442	-0.237799	-0.192097	-0.0292276	-0.038286	-0.0150982	-0.000295576	-0.150469	0.131052	0.00479828	-0.0701775	-0.164703	-0.177756	0.0724592	0.122949	-0.0696401	0.0954755	0.076467	-0.0911428	-0.203905	-0.0438419	0.272757
1368494_at	S100a8	116547	S100 calcium binding protein A8	-0.103473	-0.114017	-0.120841	0.0977554	-0.197418	0.0541363	-0.509849	-0.341016	-0.052889	-0.285522	-0.219188	0.0985141	-0.256253	-0.00456679	0.387389	-0.312989	-0.286382	-0.0112236	-0.342706	-0.136006	-0.160214	0.026944	-0.140142	0.0637088	0.533401	0.0853305	0.0862874	-0.0633505	-0.100311	0.295172	-0.260959	-0.108593	0.177274	0.2878	-0.149145	-0.0824099	0.00379019	0.413483	0.368732	0.2248	-0.0555363	0.157995	0.452673	0.142498	0.585463	0.144264
1368495_at	Rln1	25616	relaxin 1	-0.0488097	-0.0299438	-0.044665	0.0576645	0.00820695	0.0780771	-0.107355	0.0919752	-0.0893277	0.130703	-0.187396	0.13714	0.281853	-0.105221	0.220287	-0.177328	-0.148608	-0.0238953	-0.0277683	0.0793065	-0.164326	-0.114811	-0.00572163	0.208488	-0.0490668	-0.0161284	-0.0850148	0.0254241	0.0427509	-0.0650574	0.199674	0.149166	0.105279	-0.0619054	0.0848879	-0.0393325	-0.146933	0.0493359	-0.231791	-0.116293	-0.0363887	-0.037982	-0.00943875	-0.0851536	-0.112004	0.214058
1368497_at	Abcc2	25303	ATP-binding cassette, subfamily C (CFTR/MRP), member 2	0.161887	-0.0961779	0.0109049	0.198812	0.0137677	0.171144	-0.168084	-0.391525	0.292419	-0.0146209	0.115964	0.0258784	0.0415139	-0.121383	-0.18373	0.154181	-0.105069	-0.0186234	0.551987	0.154834	0.319709	0.0881596	0.38346	-0.137558	-0.0272661	0.130556	0.0538266	0.21238	0.300704	0.0623991	0.117915	-0.213259	0.0302267	0.137886	-0.114823	-0.00359764	0.169551	0.261605	0.286733	-0.474834	0.0364142	0.0973418	-0.308032	0.202197	-0.2663	-0.0923433
1368503_at	Gch1	29244	GTP cyclohydrolase 1	0.0956539	-0.120968	0.0159111	-0.0722784	0.00365049	0.051944	-0.129906	0.00449932	-0.0794358	-0.233186	-0.380254	-0.359433	0.161061	-0.0921989	0.0792608	0.0802864	-0.276288	-0.0284886	-0.0474844	-0.151941	-0.0338965	0.282886	0.186959	-0.043744	0.193296	-0.0916815	0.0883654	0.0337569	-0.127347	-0.00653662	0.157119	-0.168171	-0.216119	-0.0397474	-0.310735	-0.149707	-0.0824134	-0.0709598	0.1815	0.0801963	0.271669	0.0762266	-0.26052	-0.00657762	-0.021846	-0.146176
1368505_at	Rgs4	29480	regulator of G-protein signaling 4	-0.356302	0.137753	0.223624	-0.0438314	0.611604	0.361156	-0.380845	-0.177932	-0.119734	0.0606671	0.322277	0.276871	0.297933	0.315181	0.0309881	-0.346844	-0.245214	-0.195205	-0.290888	-0.00788105	-0.002285	-0.56776	0.115658	-0.0489145	0.0969013	-0.149449	-0.110105	-0.219084	0.2163	0.233316	-0.0833576	-0.27149	-0.226452	0.115491	0.194049	-0.0787224	0.911577	0.107187	0.400252	0.95194	-0.131556	0.333468	0.387272	0.0348693	0.335122	0.235999
1368508_at	Psma3	29670	proteasome subunit alpha 3	0.344584	0.13357	0.17051	0.237915	0.103146	0.0491395	0.044758	-0.069778	0.0727115	0.122751	0.0264452	-0.128678	0.0109271	0.0908361	-0.0347782	0.157503	0.203966	0.0109937	0.170177	0.0470496	0.163333	-0.0364138	-0.0466868	-0.16273	0.00012262	-0.162649	0.0272309	0.0966465	-0.000380563	-0.0262605	0.195031	0.0658374	0.042582	0.13323	-0.0437946	0.0103593	0.0781507	0.212038	0.108663	-0.12811	-0.0343256	-0.160765	0.132063	0.196403	0.331109	-0.0854042
1368509_at	Bbs2	113948	Bardet-Biedl syndrome 2	0.744446	0.025013	0.313112	0.490933	-0.163472	-0.155383	0.573269	0.134958	-0.381327	0.877278	-0.24259	-0.0454033	-0.169117	0.0313387	-0.298932	0.763738	-0.0564392	0.0387547	-0.140706	-0.297771	0.638177	0.192808	-0.000729809	-0.0784385	0.627714	0.590519	0.231421	0.382656	-0.0626873	-0.129564	-0.056211	0.00268997	0.0865616	-0.17456	-0.00383613	-0.105062	0.120262	-0.395857	0.0215552	1.12786	0.301392	0.836135	0.180768	-0.410408	-0.152127	0.629157
1368516_at	Ptpra	25167	protein tyrosine phosphatase, receptor type, A	-0.159936	-0.10065	-0.0697618	-0.0164406	0.000286072	0.0717237	-0.0328387	-0.0198426	0.0210813	0.0031182	0.039413	0.116474	-0.20708	-0.0951534	0.0336705	-0.068812	-0.18104	0.0509505	-0.0701089	0.051714	0.0966397	-0.0924568	-0.0791953	-0.0192554	-0.0767772	-0.00128937	-0.0604772	0.129746	0.0444215	0.148138	-0.128302	-0.302834	-0.179012	0.0604951	0.00551631	-0.11573	0.0125727	-0.114699	0.0780211	0.0841172	0.0650102	0.219184	-0.124374	-0.161988	0.114665	0.068096
1368517_at	Ssbp3	84354	single stranded DNA binding protein 3	0.234485	-0.0138237	-0.0742157	0.54065	0.0352654	0.177399	-0.0502888	-0.197167	-0.15478	0.218217	0.0239202	-0.156105	-0.215976	0.103705	0.0204973	-0.10606	0.118566	-0.0933997	0.285573	0.198256	0.444416	0.0568071	0.0790429	-0.146948	-0.041447	0.0342901	-0.105353	-0.0818879	0.0251264	-0.0863544	-0.111006	0.116653	0.0227473	0.10092	0.00903015	-0.100194	0.296532	-0.0794905	0.0673073	-0.167334	-0.465271	-0.381502	-0.0629365	-0.307664	-0.0689971	-0.0910877
1368518_at	Cd53	24251	Cd53 molecule	-0.180086	0.0634503	-0.11872	0.0551303	-0.224865	0.18062	0.253854	0.00849955	-0.198258	-0.376376	-0.302093	-0.215628	-0.197273	0.525616	0.41963	-0.331342	0.141287	0.0801993	-0.138887	0.0652568	0.0126982	-0.317917	-0.0130452	-0.160963	0.160299	-0.168739	0.04987	-0.0368676	-0.0942369	-0.0474095	0.796927	-0.126664	0.0644199	0.141074	-0.278096	-0.178701	0.799291	0.339447	0.913575	0.833842	0.292627	0.645232	0.90868	-0.260316	1.12015	0.577338
1368520_at	Apoa4	25080	apolipoprotein A-IV	-2.52441	0.202022	-0.00986117	-2.75744	-0.0856477	-0.360281	-1.06105	-0.709622	-0.314544	-1.81472	-0.0499526	-0.348222	-0.675671	0.404159	-0.218445	-0.653488	0.0277709	-0.292598	-0.171451	-0.198263	-0.25988	-0.472546	-0.348005	0.0388544	-0.820798	-0.0404001	-0.610163	-0.786382	-0.187315	-0.936613	-1.00067	-0.705649	-1.02222	-0.884909	-0.274151	-0.304102	-0.651613	-0.170356	-0.397738	-0.695068	0.0847564	-0.240739	0.176085	0.465662	-0.0820847	-0.57887
1368521_at	Napsa	60575	napsin A aspartic peptidase	-0.664023	0.0771232	-0.00359403	-0.495397	-0.447271	0.165721	-0.244058	-0.138707	-0.142481	-0.630404	-0.363004	-0.0302205	0.0898942	0.232259	0.349538	-0.246703	0.191169	0.019816	-0.458969	-0.0788426	-0.307319	-0.305714	-7.67333e-05	0.0869609	0.337593	-0.0342537	0.0928723	-0.183405	-0.0525425	0.00179543	0.0953796	-0.184767	-0.0861588	-0.325032	-0.194013	-0.0913777	0.171463	0.278899	0.603229	0.380309	0.273541	0.483731	0.726056	-0.375795	1.00746	0.587523
1368522_at	Timeless	83508	timeless circadian clock	-0.152101	0.240507	0.0612415	0.0930443	0.14033	0.224476	-0.0809707	0.259761	0.209092	-0.277075	-0.00541383	-0.199568	-0.258301	0.149332	0.289285	-0.389072	0.0727926	-0.211763	-0.403975	-0.126333	0.265213	-0.353283	-0.0159244	0.169024	-0.0859685	-0.158378	0.0506365	0.366868	0.122419	0.21259	0.161218	0.0840903	-0.0321782	0.172579	-0.303082	-0.141698	0.640335	-0.0810218	0.441746	0.275464	-0.144783	0.264474	0.555687	0.144417	0.576901	0.768627
1368528_at	Cd99l2	171485	CD99 molecule-like 2	-0.822401	-0.230233	-0.0990334	-0.62069	0.192515	-0.0689513	-0.0227293	0.0772728	0.0802419	-0.218678	0.0906208	-0.0335006	-0.165355	0.00688449	-0.43205	-0.108152	0.0388877	0.0263735	0.255976	-0.0719554	0.195276	0.218159	0.0834357	0.0699715	-0.228612	-0.0673329	-0.245139	-0.403586	0.0328632	-0.402015	-0.0412137	-0.0976507	0.149251	-0.381748	0.0456802	-0.0151757	-0.189076	0.139377	-0.255423	-0.23394	-0.0871972	-0.250845	-0.0306854	0.0775688	-0.242922	-0.205453
1368530_at	Mmp12	117033	matrix metallopeptidase 12	-0.292533	0.0693819	-0.0531134	0.0571186	0.294381	0.167379	-0.0308088	-0.0159102	-0.202855	0.0053787	-0.00687965	0.0703938	0.214842	0.0245433	0.0156359	-0.268923	-0.326769	-0.102249	-0.166157	0.0666197	-0.25899	0.172043	0.0611664	0.0559801	0.0721306	0.138859	0.409385	-0.0871332	-0.0869896	-0.233373	0.415958	0.37936	0.0633239	-0.118071	-0.032334	-0.105163	3.23678	0.889938	3.33802	4.19602	1.19369	3.04757	2.12024	0.206454	1.12573	2.32836
1368535_at	Hrk	117271	harakiri, BCL2 interacting protein	-0.203225	0.074846	-0.195956	0.0176843	-0.125721	0.0158958	-0.0996867	-0.0459593	0.0593783	-0.1907	-0.121068	-0.193609	0.18212	-0.227953	-0.055055	0.0271638	0.119602	0.118254	-0.0187115	-0.125117	0.00165161	-0.0610293	0.0748481	-0.213129	-0.0123049	-0.157585	-0.0319662	0.345712	0.18752	0.0902914	-0.168156	-0.0663867	-0.108312	-0.232165	-0.218515	0.0438512	-0.0107348	0.053524	-0.00630032	0.0520016	0.0631548	0.107142	0.0886146	0.00790109	-0.0680736	-0.0226252
1368536_at	Enpp2	84050	ectonucleotide pyrophosphatase/phosphodiesterase 2	-1.31919	-0.100417	-0.237215	-0.793801	-0.0250449	-0.14747	-0.271879	-0.0575813	-0.0510234	-0.326907	0.0569657	0.247963	-0.641165	0.142155	0.0115109	-0.401845	-0.0818422	0.0571107	-0.434031	-0.171919	0.0577563	-0.728039	-0.0658502	-0.0889341	0.0503702	-0.0364472	-0.0171233	-0.0189191	-0.0888417	-0.0643288	0.0630679	-0.062929	-0.129996	-0.320505	-0.283551	-0.199943	-0.00279579	-0.0922332	-0.160807	0.0486119	0.0229103	0.0325617	-0.0983186	0.0269002	-0.0238383	0.0760293
1368540_at	Tpbg	83684	trophoblast glycoprotein	0.182343	0.223271	0.0221899	0.0478427	0.118401	0.272789	-0.0279416	0.122774	-0.0236421	-0.223769	-0.0711543	-0.0117831	-0.0887923	0.28236	-0.0716695	0.131714	0.141131	0.0392765	0.567412	0.361346	0.337984	-0.00822167	-0.321504	-0.0125955	-0.202145	0.20458	-0.00505191	-0.13005	-0.0748186	-0.111273	0.14923	-0.0936505	-0.0935877	0.0591719	0.0276779	-0.104708	0.283041	-0.00214978	0.550704	0.466186	-0.105892	0.286336	0.0827309	-0.154076	-0.15451	-0.111556
1368541_at	Emb	114511	embigin	-0.276737	0.159193	-0.00441221	0.290604	-0.067904	-0.100157	-0.19399	0.0297964	0.0215487	-0.535464	-0.0396368	-0.1403	0.281594	0.395106	0.573766	-0.476495	-0.00611947	-0.229636	-0.751831	-0.104702	-0.267796	-0.453971	0.241188	0.0828861	0.428615	0.179539	0.170108	-0.37182	0.00562326	-0.0666228	0.337143	-0.151183	0.0391626	0.197011	0.150636	0.142536	0.585837	0.220548	0.536053	0.424584	0.136086	0.433162	0.429166	-0.227538	0.559414	0.580147
1368543_at	Nox4	85431	NADPH oxidase 4	-2.29281	0.388484	0.649896	-3.63682	0.0582149	-0.32821	-0.297498	-0.548022	-0.620547	-1.47037	-0.461477	-0.304894	-1.74377	0.0439268	-0.837734	-0.254628	-0.00164562	-0.00702021	-0.322356	-0.37942	0.354219	-1.59035	-0.556891	-0.459615	-1.1177	-0.232622	-0.15551	-0.417307	-0.130463	-0.0860417	-1.78613	-0.508703	-1.21067	-2.0488	-0.641707	-0.682972	-1.65928	-0.67972	-0.663828	-1.21969	0.411165	-0.0371272	-0.39939	-0.0425253	-0.391868	-1.72075
1368545_at	Cflar	117279	CASP8 and FADD-like apoptosis regulator	0.0125874	0.0963649	0.0255579	-0.627452	-0.205632	-0.0989582	-0.0626955	0.0962528	-0.0115966	-0.0902129	-0.163026	-0.182282	-0.237341	0.0289984	-0.0548423	-0.341592	-0.0384937	-0.236114	-0.187628	0.284722	-0.00718019	-0.260542	0.0275523	-0.0295076	0.0395236	0.0466563	0.187173	-0.501988	0.0404284	-0.272468	-0.273339	-0.0634266	-0.123967	-0.216292	0.0660916	-0.0452903	-0.00991258	-0.00373128	-0.192779	-0.286922	0.0297357	-0.276074	-0.16634	0.126555	-0.111165	-0.224237
1368555_at	Cd37	29185	CD37 molecule	-0.314336	-0.160952	-0.175608	-0.209084	-0.211956	0.15103	0.146966	0.12645	-0.0738468	0.00690109	-0.11923	-0.0396203	0.161991	0.246636	0.447009	-0.376699	-0.0334871	0.11353	-0.185678	0.466276	0.012736	-0.391022	0.0758372	0.171774	0.21085	-0.110868	0.0518263	0.108751	-0.150003	0.0738878	0.681968	0.056125	0.0167332	0.0785541	-0.1598	-0.276859	0.469997	0.1799	0.560939	-0.0501909	-0.166937	0.241238	0.121768	-0.234483	0.485178	0.358549
1368558_s_at	Aif1	29427	allograft inflammatory factor 1	0.000680906	-0.0106731	0.0966035	0.355284	-0.280791	0.0477683	0.764789	0.278623	0.302659	0.113429	-0.0285553	0.252468	-0.10776	0.572965	0.546793	-0.241575	0.189205	0.180139	0.0761975	0.0793584	-0.121622	-0.201666	0.313539	0.377578	-0.187489	-0.557151	-0.576328	-0.253375	-0.163661	-0.234388	0.3642	-0.126016	-0.0522698	0.177434	-0.198122	-0.163985	0.311859	0.131693	0.575283	0.0541172	0.228319	0.310116	0.524964	-0.201831	0.854235	0.634272
1368560_at	Kcnj5	29713	potassium channel, inwardly rectifying subfamily J, member 5	-0.0569105	0.0839751	0.0368757	0.129728	0.150907	-0.0997196	0.0489514	0.0910631	0.072764	0.115939	-0.0244803	-0.0632093	-0.114522	-0.275947	-0.0764555	-0.0577482	-0.0204191	0.235123	0.0176416	-0.11497	-0.189916	-0.0740891	0.204315	0.146817	-0.0957716	-0.240418	-0.0770908	-0.00922223	-0.0198552	-0.0747994	-0.0538251	-0.249469	-0.064706	-0.239913	-0.125095	-0.160499	-0.185731	0.133691	-0.172709	-0.399798	-0.175811	-0.30375	-0.097621	-0.0034858	-0.13877	-0.0360703
1368563_at	Aspa	79251	aspartoacylase	-0.521901	0.0528633	0.125091	-0.274414	0.305608	0.677629	-0.200096	-0.016577	-0.154024	0.00739771	-0.163997	0.63311	-0.172168	-0.0122094	0.378282	-0.0684285	0.247266	0.630435	0.518343	-0.197133	0.411413	-0.479302	-0.422888	-0.204348	0.499535	0.654925	0.396549	0.302957	-0.353842	-0.167315	0.0978833	0.094841	0.0787358	0.127268	0.037472	0.256701	0.680521	0.785752	-0.178605	0.22062	0.125504	-0.385794	-0.622086	-0.633902	-0.399152	-0.120826
1368564_at	Slc17a6	84487	solute carrier family 17 (vesicular glutamate transporter), member 6	0.0214249	0.0503456	0.0189994	0.0173017	-0.0133277	0.13443	0.0472192	0.0817937	0.178768	-0.0119471	-0.0210426	-0.0744539	0.160087	-0.232578	-0.134211	-0.149845	-0.212041	0.0156683	-0.324001	-0.236242	-0.542101	0.117378	0.153611	0.0117125	0.0115596	-0.0230442	-0.0355071	0.00583851	0.171663	0.0502155	-0.0686403	0.0188944	0.0620466	-0.0914616	-0.0418448	-0.0774715	-0.0196781	0.264865	0.0314187	-0.220639	-0.0851283	-0.1033	-0.117834	0.270483	-0.118228	0.435532
1368565_at	Slc1a3	29483	solute carrier family 1 (glial high affinity glutamate transporter), member 3	0.439114	-0.101306	0.386503	-0.643451	-0.440873	-0.0878921	0.15095	-0.305848	-0.374924	-0.845716	-0.704158	-0.109583	-0.362475	-0.0227305	0.315668	-1.10527	-0.456793	-0.557641	-0.0218122	0.558088	0.0200701	-0.126397	0.287363	-0.0173163	0.243336	-0.273303	0.510845	-0.844526	-0.200321	-0.424898	-0.38974	0.0629308	-0.29925	-0.823187	-1.04654	-0.870161	-0.202548	-0.376577	-0.401402	-0.218182	-0.32585	-0.254977	-0.193092	0.104311	0.77486	0.0782534
1368567_at	Ndufv3	64539	NADH dehydrogenase (ubiquinone) flavoprotein 3	0.30541	0.00767558	0.285853	0.175451	0.0354902	0.180673	-0.208625	-0.236848	-0.175564	0.381825	0.155366	0.0621305	0.0346194	-0.073318	0.0573287	0.0828593	-0.0465206	0.069648	-0.015976	0.078787	0.308516	0.0358421	0.00148768	-0.0594167	0.137732	-0.0442455	0.0505227	0.448002	-0.0264261	0.163988	0.129785	0.0169201	0.126668	0.4696	-0.0560958	0.0972007	-0.274073	-0.0751172	-0.11991	0.143624	-0.0232352	0.183289	-0.0890804	-0.251437	-0.0936073	-0.394892
1368569_at	Akr1b7	116463	aldo-keto reductase family 1, member B7	2.67796	-2.12386	-2.18975	5.29787	0.0645007	0.207781	1.48869	-0.0861697	1.23687	2.36127	0.974095	-0.0630993	2.09506	0.393653	1.18896	-1.39682	-2.29053	-1.75753	1.98117	2.47661	0.229461	2.53323	1.80275	0.452126	0.414185	0.45238	0.278975	-0.253349	-0.0546166	-0.139497	0.496057	-0.0128607	0.596128	1.14169	0.638882	0.00497373	-0.0441428	0.309239	-0.109186	-1.14278	-1.02049	-1.05456	-1.33467	0.306557	0.478936	1.44951
1368570_at	Lrat	64047	lecithin-retinol acyltransferase (phosphatidylcholine-retinol-O-acyltransferase)	-0.579091	-0.17453	-0.220771	-0.329428	0.000615983	-0.0304144	0.0334813	0.100882	-0.16044	-0.0608284	0.103271	-0.0241805	-0.358745	0.252032	-0.183147	-0.225039	0.024497	-0.22712	0.100207	-0.0707351	0.0709648	-0.483025	-0.174739	-0.041454	-0.197497	0.118894	-0.121789	-0.0932906	-0.0845667	-0.321725	0.0229766	-0.141678	-0.0945289	-0.23157	-0.0663394	-0.166427	0.151012	0.0708749	0.104157	0.111436	0.0351181	0.293827	-0.565056	-0.378419	-0.312096	0.0836935
1368571_at	Clip2	29264	CAP-GLY domain containing linker protein 2	-0.221275	-0.12116	0.00660496	-0.293636	-0.278328	-0.293044	-0.0194497	0.0598734	0.02776	-0.524836	-0.111447	0.0069892	-0.108197	0.210281	0.125031	-0.33684	-0.444044	-0.127422	0.0746599	-0.298627	-0.074322	-0.126797	-0.0272809	0.10407	-0.0028019	0.0369421	-0.0875678	0.128332	0.13587	0.0496476	0.212155	-0.00678947	0.0439557	0.191908	-0.038272	-0.0281936	0.297585	0.0297534	0.470812	0.36921	-0.0277907	0.266602	0.102721	-0.0488248	0.496652	0.0428707
1368573_at	Kpnb1	24917	karyopherin (importin) beta 1	0.127116	0.0810129	-0.00610803	0.20931	0.129747	0.275393	-0.0427715	-0.00691439	0.0517091	0.120937	0.186983	0.290003	-0.350986	0.206871	-0.0569223	0.0006391	0.226999	0.109621	0.526621	0.133801	0.525114	0.0252439	0.0453793	-0.0795195	0.00268944	0.0406061	0.00478037	0.118819	-0.121518	-0.0346654	0.271279	-0.217209	-0.0613138	0.139194	0.0311085	0.0187497	0.381703	0.0710262	0.34297	0.141566	-0.0988266	0.114075	0.176594	-0.0648183	0.324071	0.170544
1368574_at	Adra1b	24173	adrenoceptor alpha 1B	-0.157725	-0.200818	-0.127454	-0.0861244	-0.0639744	-0.077433	-0.0210488	0.0606121	0.118715	-7.06264e-05	0.269533	0.138671	-0.130173	0.0370442	0.0442821	-0.0281505	-0.0329298	0.162499	0.0181548	0.144841	-0.042131	0.282331	-0.188463	0.0796858	-0.0437605	-0.151407	-0.132015	-0.329406	-0.25163	-0.251596	-0.533692	-0.153955	-0.348941	-0.315083	-0.159983	-0.13925	-0.57698	-0.10506	-0.440075	-0.534763	-0.106856	-0.457892	-0.261148	0.00470047	-0.215899	-0.105549
1368588_at	Ddx52	85432	DEAD (Asp-Glu-Ala-Asp) box polypeptide 52	0.148586	0.0529944	0.141363	-0.01446	-0.0113597	0.000642847	0.157675	0.0301046	0.105621	0.128295	0.218897	-0.0905968	-0.361418	0.435156	-0.147432	0.100109	0.258653	0.00223839	0.42922	0.0179183	0.254724	-0.148639	0.00156954	-0.289397	-0.11911	-0.184859	0.0983185	0.134292	0.157494	0.00974306	-0.188881	-0.0730462	-0.0189765	0.258352	-0.0319758	0.431401	0.548691	0.356675	0.322234	0.248307	0.124812	-0.0728358	0.225431	0.460297	0.486489	0.0190792
1368589_at	Ptprj	29645	protein tyrosine phosphatase, receptor type, J	-0.0667334	-0.0511679	-0.0235112	0.0109852	0.0723428	0.022515	0.265815	0.11426	-0.0679517	0.114639	-0.0765724	-0.0542445	-0.166552	-0.0240126	0.082342	-0.317705	0.238699	0.398065	0.206141	0.47035	0.472562	0.414696	0.0900587	0.432835	-0.229493	-0.12978	0.0173702	-0.314588	-0.0947071	-0.100939	-0.0956459	-0.180311	-0.256363	-0.410988	-0.309655	-0.105534	-0.422686	0.0524579	0.167819	0.141272	0.0239804	0.271063	-0.267413	-0.266476	-0.0179732	0.341565
1368593_at	Cd1d1	25109	CD1d1 molecule	-0.513341	-0.119529	-0.246689	-0.289764	0.0741519	-0.0852539	-0.0429133	0.379594	0.0683949	-0.149002	0.14798	0.156286	-0.0077783	0.0111448	0.103864	0.0365443	0.000482369	-0.131357	0.000340114	0.129697	0.196335	-0.125943	0.0172819	0.00689243	-0.221396	0.00917441	-0.237221	-0.346749	-0.0292213	-0.158266	-0.188546	0.084256	0.0219751	-0.152478	-0.136423	-0.140589	-0.299316	-0.16194	-0.0993526	-0.420895	-0.146446	-0.255052	-0.256256	-0.0553565	-0.0199733	0.117582
1368596_at	Sik1	59329	salt-inducible kinase 1	-0.210903	-0.358372	0.0175815	0.126876	0.191741	0.114482	-0.00487404	0.0828245	-0.210754	0.0246158	0.0988261	-0.0905337	0.0520866	0.169122	0.437379	-0.026476	-0.264848	-0.00536022	-0.0349505	-0.186666	-0.0293672	0.303885	0.0713904	0.0946863	-0.0566875	0.208614	0.000838303	-0.0490756	-0.117573	0.0744922	-0.0828574	-0.223598	-0.165334	-0.0320703	0.0163322	0.023496	0.113282	-0.0407222	-0.00436344	-0.301142	0.0742084	-0.197218	-0.339231	-0.214259	-0.130939	-0.142771
1368600_at	Slc26a1	64076	solute carrier family 26 (anion exchanger), member 1	-0.665853	0.0329566	0.0625272	-0.500176	0.18246	0.17412	-0.184581	0.0324211	-0.00167939	-0.157658	0.102972	0.225722	-0.23743	-0.195102	-0.139696	-0.111122	-0.116582	-0.0264969	0.0918087	0.0962156	0.122057	-0.0922213	0.0862421	-0.0712396	0.123323	0.0450139	-0.0259667	0.0394066	-0.0751775	0.122398	-0.245105	-0.256073	-0.375312	-0.0646765	-0.0959141	-0.0196969	-0.103028	-0.100474	-0.234074	-0.00921361	-0.0134907	0.00776593	-0.144615	-0.0915324	-0.320709	-0.120565
1368607_at	Cyp4a8	266674	cytochrome P450, family 4, subfamily a, polypeptide 8	-0.678425	-0.788197	-1.02716	-2.07762	-0.25473	0.153522	-1.54713	-1.36054	-1.69257	0.865285	0.736885	0.969921	0.516133	-0.0305473	-0.716242	0.971949	-0.739287	-0.410481	1.16177	-0.255346	0.382953	1.08361	-0.724789	-0.872594	-1.44179	-1.81959	-1.16915	-0.180617	-2.14194	-1.54106	-1.12375	0.452954	-0.299684	-0.676146	-0.132227	-0.557501	-0.43409	0.140333	-1.04295	-0.534947	-0.145147	-1.38832	-0.611485	-0.569855	-1.20586	0.16867
1368608_at	Cyp2f4	54246	cytochrome P450, family 2, subfamily f, polypeptide 4	-0.851105	0.0474284	-0.0715323	-0.768768	0.0340115	-0.141782	-0.0197164	0.128519	-0.0382433	-0.166252	0.0441573	-0.0167375	-0.4116	0.000968475	-0.161239	-0.260907	-0.0250237	-0.00834169	-0.0641169	0.104172	0.255894	-0.325563	-0.0648554	-0.173192	-0.0571266	0.150129	-0.0457633	-0.0232394	0.0677411	0.00307996	-0.231649	-0.182381	-0.0538365	-0.083634	0.0332071	0.0785426	-0.297145	-0.0183181	-0.169019	-0.565293	-0.0563959	-0.375605	-0.316447	-0.137458	-0.19093	-0.139472
1368614_at	Mlxipl	171078	MLX interacting protein-like	-0.1409	-0.0974141	-0.114713	-0.259167	-0.0400546	0.0393109	-0.224861	-0.076754	0.0965001	-0.11319	-0.0247863	-0.0441459	0.0853068	-0.061057	0.1963	-0.415221	-0.0470439	-0.373147	-0.240146	-0.134038	-0.299545	-0.150805	-0.159936	-0.118613	-0.0216543	0.119752	0.232524	-0.0130953	0.174044	0.130156	-0.340444	-0.241485	-0.0643402	-0.059026	0.0534912	0.135306	0.270353	-0.0777562	0.0676621	-0.314798	-0.0259554	-0.122507	-0.0966462	0.243246	-0.139791	-0.0218612
1368617_at	Serpina5	65051	serpin peptidase inhibitor, clade A (alpha-1 antiproteinase, antitrypsin), member 5	0.300427	0.197115	0.171628	-0.341591	0.193879	-0.105398	0.00658926	0.154274	0.0529273	-0.00318073	0.204066	0.0749499	0.486798	0.295411	0.135798	-0.121817	-0.364446	-0.0125344	0.0839558	-0.0121805	0.0114329	0.100227	0.13003	0.0735334	0.316744	0.324437	0.111584	0.222088	-0.208405	-0.0491526	-0.0895635	0.196706	0.0982356	0.147272	0.1627	-0.0546511	-0.304548	-0.0663093	-0.0998835	-0.224213	-0.270061	-0.298768	-0.300838	-0.454624	-0.438498	-0.6388
1368619_at	Ddx25	58856	DEAD (Asp-Glu-Ala-Asp) box helicase 25	-0.0107046	-0.0380765	-0.261469	-0.229761	-0.157745	-0.232994	-0.111879	-0.127378	0.031361	0.00673621	0.0402804	0.0569574	0.109979	-0.0786424	-0.0628005	-0.178107	0.0801922	0.123879	-0.211593	0.029028	-0.291909	0.0391003	0.0754832	0.0392462	0.103385	-0.000705559	0.151987	-0.063409	-0.0630388	-0.0162755	0.0425195	-0.0288158	-0.0655785	-0.167618	-0.15589	-0.0580173	0.0534366	0.234454	0.0596101	-0.104577	0.00988222	-0.182385	0.158565	0.128828	0.0549981	0.272836
1368621_at	Aqp9	65054	aquaporin 9	-0.0799394	-0.051313	-0.0845698	0.0380111	-0.0197039	-0.114911	0.0750893	0.0899107	0.11764	0.0143544	0.145135	0.0245176	-0.000147713	0.203995	0.234156	-0.23559	-0.0193047	0.0902306	-0.211654	0.0441028	0.0755038	-0.283391	0.095919	0.17262	-0.031843	-0.0158406	-0.204801	-0.192955	0.0808036	-0.00828066	-0.274455	-0.170014	-0.172743	-0.199692	0.111161	-0.263885	-0.190897	0.016817	-0.0494444	-0.347088	-0.102911	-0.0428791	-0.0716223	-0.0589396	0.00306065	0.181409
1368629_at	Reg1a	24714	regenerating islet-derived 1 alpha	-0.0249775	-0.0306732	-0.0442631	0.321812	0.134985	0.148259	-0.0158045	0.0908574	0.0243114	0.164482	0.0924421	0.113748	0.151247	-0.120558	0.101206	0.0783258	0.00665907	0.292166	-0.205521	0.0158181	-0.35111	0.0738625	0.126283	0.158828	0.0515758	-0.159812	-0.21513	0.0609735	0.0498823	0.0466913	-0.0428983	0.00946711	-0.0774244	0.0371509	-0.00491987	0.0987751	-0.159952	0.0270488	-0.294184	-0.16394	0.0222303	0.147546	-0.0235132	0.137175	-0.156424	-0.0627582
1368636_at	Cyp27b1	114700	cytochrome P450, family 27, subfamily b, polypeptide 1	-0.165233	-0.134388	-0.111597	-0.138598	0.0809989	-0.0118479	0.102894	0.102804	0.145665	0.150579	-0.0218726	-0.0998583	0.163213	-0.230324	-0.116609	-0.137214	-0.229849	-0.254836	-0.0510866	0.00168304	-0.283436	0.194935	-0.000724006	0.141624	0.127316	0.118293	0.0671401	0.186059	0.366052	0.336235	0.00348012	0.0210508	-0.0401584	-0.219337	-0.0155687	-0.177217	-0.032636	0.224778	0.107603	0.124711	-0.00698196	0.0789634	-0.188573	-0.144627	-0.242918	0.104762
1368640_at	Spata19	171403	spermatogenesis associated 19	-0.29289	-0.133052	-0.120423	-0.0458703	0.142758	-0.0177782	-0.265121	-0.26829	-0.175406	0.128341	0.031436	-0.0478296	0.237639	0.0946373	0.177389	0.0672353	0.176632	0.04326	-0.0689729	0.0543952	0.0156764	0.107218	0.119268	0.0027052	0.0807697	0.0473555	-0.00656309	-0.108917	0.0712119	-0.0216843	-0.139155	-0.146019	0.024788	0.0387038	-0.100586	-0.0626502	-0.0867074	0.201523	0.0441475	-0.256938	0.197121	-0.219437	-0.0259234	-0.0354846	-0.232202	-0.205144
1368641_at	Wnt4	84426	wingless-type MMTV integration site family, member 4	0.0246387	0.129115	0.0915551	-0.343644	-0.146676	0.0530784	-0.131197	-0.0321002	-0.00652639	-0.118463	-0.0414658	-0.199801	-0.318215	-0.0298982	-0.0571687	-0.061043	0.0569534	0.0507533	-0.115807	-0.0409177	-0.118806	-0.422115	-0.113608	-0.0962505	0.0836037	-0.0590172	-0.0146067	-0.0564097	-0.158043	0.015573	0.243808	0.135504	-0.0335721	-0.0098	0.050477	0.0779491	0.333102	0.0354432	0.176747	0.656348	-0.0944616	0.609398	0.0367649	0.0798845	0.013824	0.0298737
1368642_at	Cdh2	83501	cadherin 2	-0.592855	-0.0358403	-0.0186484	-0.482151	-0.0807648	-0.0281928	0.0509362	0.116	0.0666439	-0.166185	0.0927331	0.0765148	-0.204677	0.0804783	0.103979	0.0991941	0.169628	-0.0365638	0.187757	0.211949	0.476407	-0.203432	0.0613399	0.0250647	-0.0853669	0.0730308	-0.0567973	-0.179181	0.0213356	-0.123376	-0.0799479	-0.0829364	-0.142482	-0.117626	-0.153054	-0.289032	0.153708	-0.0352015	0.130772	-0.0426934	-0.110795	0.0441549	-0.118545	0.0268235	0.0148515	0.0888566
1368646_at	Mapk9	50658	mitogen-activated protein kinase 9	-0.313402	-0.0700374	-0.114629	-0.13787	-0.0150608	-0.044071	0.0237055	0.155289	0.172607	0.07577	0.199778	0.14026	-0.328414	0.8447	-0.177431	-0.340971	0.0355035	-0.0415034	0.102811	0.0111223	0.49568	-0.128001	0.127141	0.0441131	-0.269316	0.169162	0.0966145	-0.420897	-0.093659	-0.356966	-0.462969	-0.0145187	-0.179969	-0.292586	-0.076662	0.0392984	-0.470438	-0.0451186	-0.279056	-0.653153	-0.28854	-0.308838	-0.411427	-0.18871	-0.260189	-0.177315
1368649_at	Dkc1	170944	dyskeratosis congenita 1, dyskerin	0.228009	0.0249225	0.058696	0.0202867	-0.0502881	0.0923666	0.133753	0.0538682	-0.0231997	0.0973062	-0.0592063	-0.081446	0.163935	-0.0611232	0.285417	-0.179391	-0.0238226	-0.23878	0.0294364	-0.00542925	0.238139	0.0921028	0.138864	-0.0445625	0.076425	0.218518	-0.00225987	0.092695	0.0302038	0.0852699	0.209169	-0.0228661	0.0434835	0.018131	-0.0173366	-0.0885378	0.124406	-0.0260761	0.0852655	0.471567	0.197833	0.363379	0.0665147	0.0218271	0.0806958	-0.169993
1368650_at	Klf10	81813	Kruppel-like factor 10	0.793232	-0.170037	0.423691	1.0906	0.299798	-0.472676	0.188443	-0.358582	-0.115477	-0.00413666	0.588219	0.207805	-0.000523294	-0.136127	-0.236909	0.109036	0.351692	0.442063	0.667703	-0.125843	0.422533	0.296916	0.163953	0.35463	-0.387899	-0.247455	-0.561007	-0.192776	-0.0445014	0.425978	0.26508	0.268796	0.418156	-0.324709	0.0935912	-0.114749	0.0335727	-0.074247	0.2974	-0.238777	-0.046199	-0.0829612	0.0753339	0.106684	0.103186	0.49115
1368654_at	Npap60	25497	nuclear pore associated protein	-0.0622064	-0.283986	-0.0208183	0.210297	0.151551	0.0373508	0.149257	-0.107096	0.0419132	0.00920307	0.150475	0.210644	-0.0786106	0.372462	0.0701595	-0.121628	-0.0154141	-0.0177875	0.223207	-0.0775641	0.246943	0.0789655	-0.0934982	-0.00984916	-0.155058	-0.199287	-0.120233	-0.041547	-0.225796	-0.265441	-0.156398	-0.172498	-0.0622391	-0.215021	-0.00781347	0.0929797	0.0581018	-0.13377	-0.051123	-0.306091	-0.184725	-0.0871681	-0.06466	0.116057	0.1716	0.0897877
1368658_at	Cntf	25707	ciliary neurotrophic factor	0.289067	0.275177	0.133197	-0.111296	-0.180777	-0.25927	0.0415948	-0.0341169	-0.0294887	-0.252708	-0.0769473	-0.343002	0.103408	0.098988	0.301971	0.014163	0.28681	0.0735856	-0.0392474	-0.218539	0.10447	0.267613	0.0785325	0.0195745	-0.0771607	0.00640893	0.116136	-0.599782	-0.51879	-0.342409	0.174715	0.0653558	0.0336512	-0.205924	-0.26899	-0.197806	-0.249721	-0.127804	-0.0602767	-0.0029069	-0.217383	-0.200649	0.0304903	-0.101082	0.0648537	0.0349796
1368659_at	Agxt2	83784	alanine-glyoxylate aminotransferase 2	-0.0863348	-0.828455	-0.250431	0.0370289	-0.262094	0.120599	-0.547132	-0.408002	-0.438882	0.220719	0.214301	0.123621	0.180868	0.677674	0.940187	0.0282188	0.0502258	0.31089	0.226108	-0.22498	-0.122306	0.322678	0.349912	0.406055	-0.0240465	-0.107384	-0.427796	-0.495234	-0.512698	-0.787129	-0.251099	-0.105319	0.199308	-0.0616957	-0.126531	-0.212681	-0.0444179	-0.398152	-0.388731	0.46058	0.407203	0.269578	-0.313353	-0.632186	-0.167665	-0.23973
1368661_at	Slc13a2	65202	solute carrier family 13 (sodium-dependent dicarboxylate transporter), member 2	-0.26836	0.0146903	-0.0616648	-0.530645	-0.0225898	-0.129629	-0.214933	-0.0967885	0.0420157	-0.329623	-0.0376309	0.121939	0.0716494	-0.271697	0.00933587	0.348821	0.363547	0.272033	0.367211	0.22048	-0.139617	0.246762	0.173929	0.235352	-0.0776176	-0.0440196	0.0712783	-0.269301	-0.142162	-0.179386	-0.13559	-0.0312422	-0.0705349	-0.169306	0.0350864	-0.243763	-0.28378	0.154105	-0.161866	-0.461272	-0.00980202	-0.187319	-0.104647	0.280829	-0.0423322	0.154906
1368662_at	Rnf39	171387	ring finger protein 39	-0.556459	-0.167463	0.0395307	-0.260344	-0.13153	0.173941	-0.354463	-0.213246	-0.389914	-0.338991	0.126605	0.0686991	-0.323761	-0.101028	-0.0737844	0.0121243	0.27858	0.12771	-0.0443266	0.0544945	-0.0172604	0.131304	-0.0857601	0.293799	-0.211214	0.0788945	-0.116611	-0.459917	-0.199697	0.0137727	-0.516184	0.193518	-0.0118411	-0.11486	0.0769487	-0.223438	-0.598901	-0.127157	-0.118618	-0.580961	0.00843729	-0.0954026	0.0209169	0.240792	-0.0762942	-0.161588
1368664_at	LOC56764	56764	dnaj-like protein	0.0360046	-0.0969223	-0.0753186	-0.11257	-0.145331	-0.0741612	-0.152667	-0.0292239	0.0240596	-0.0783531	0.0112353	0.182916	0.20173	-0.16865	-0.0844015	-0.0522796	-0.0837281	0.0358688	-0.144549	-0.0391137	-0.255436	0.207466	0.180419	0.236544	-0.0034239	0.0559023	-0.0611836	-0.0730884	0.145822	-0.0491278	-0.0886443	-0.0710532	-0.06849	-0.090367	-0.0299882	0.0508988	-0.0302581	0.122779	0.0253582	-0.0506992	0.0906316	-0.023329	0.302204	0.224483	0.0941432	0.188536
1368667_at	P2rx3	81739	purinergic receptor P2X, ligand-gated ion channel, 3	0.171772	0.109599	0.17426	0.181026	0.382459	0.0955155	-0.00637336	0.0684316	-0.0361331	-0.0350738	-0.0793579	-0.0309642	0.262434	-0.178942	0.0321534	0.193854	-0.18984	0.107205	-0.0277239	-0.00326043	-0.0311411	-0.168137	-0.100957	0.0254969	0.149406	-0.00762376	0.101486	0.160165	0.120989	0.0563719	0.176681	0.10432	0.310581	0.162197	0.0207187	0.0576452	0.105423	0.0206066	-0.12826	-0.0634847	-0.0633831	-0.0698039	-0.17132	-0.0635768	-0.262546	0.123222
1368668_at	Plaa	116645	phospholipase A2, activating protein	0.203271	0.0356086	0.00359536	0.159383	0.102073	0.0772116	-0.128114	-0.244878	-0.0999488	0.0372784	0.0706752	-0.0148925	-0.0250413	0.017752	-0.187523	-0.131731	-0.127542	-0.199876	0.257347	0.0113085	0.318406	0.126688	0.106574	-0.0769666	0.250764	-0.0418396	-0.0526194	0.283378	-0.0429215	0.140523	0.0300194	-0.15812	-0.109257	0.1301	-0.0147969	-0.0135883	0.190486	0.0408922	0.0260875	0.0285088	-0.0279164	-0.00622823	0.0778428	-0.0270337	0.00867455	0.0575713
1368669_at	Ucp2	54315	uncoupling protein 2 (mitochondrial, proton carrier)	-0.0415516	-0.035296	-0.121306	0.0700949	-0.080306	0.0885073	0.0773664	-0.057223	-0.13763	-0.277047	-0.00530486	-0.0264773	-0.21806	-0.00709488	0.158158	-0.342648	-0.150063	0.0257554	-0.61504	-0.10411	-0.238973	-0.625875	-0.106423	-0.157666	0.138111	0.185771	0.118468	-0.0687987	-0.035598	0.123709	0.318713	0.0379984	-0.0450859	0.140744	-0.194892	-0.186002	0.14324	-0.00133498	0.343075	0.136172	0.255196	0.508263	0.282486	-0.178709	0.324575	0.478446
1368674_at	Pygl	64035	phosphorylase, glycogen, liver	-0.716512	-0.0317772	-0.121038	-0.483848	-0.0133569	-0.0571163	-0.436824	-0.154257	-0.163319	-0.305791	-0.0288419	0.0254232	-0.179879	0.0617636	-0.169235	-0.372899	0.000337563	-0.172135	-0.0746935	-0.174782	-0.151595	-0.636084	0.128161	-0.0489849	-0.501945	-0.133877	-0.245293	-0.210042	0.0466092	-0.170528	-0.27909	-0.152423	-0.111405	-0.169372	0.0563233	0.00754623	-0.316216	0.0558505	-0.0430237	-0.446683	0.0839633	-0.0334742	-0.243339	0.135289	-0.0811865	-0.252742
1368676_at	Dync2h1	65209	dynein cytoplasmic 2 heavy chain 1	0.373708	0.160608	0.144426	-0.0352629	-0.011265	-0.0706646	0.232543	-0.0609014	0.0492829	0.0742471	0.185698	0.00429906	-0.0605895	-0.078779	-0.172583	0.294101	0.172247	-0.0226305	-0.0299176	-0.276493	0.0406284	-0.0998988	0.0223583	-0.0327642	0.275541	0.0550511	0.283938	0.0210494	-0.0345497	0.0784722	0.661765	0.108928	0.325778	0.294837	0.0644573	-0.0495206	0.258947	-0.159547	-0.0760426	0.0215249	-0.0192895	0.0985008	0.118857	0.35796	-0.00100561	0.117944
1368679_a_at	Lyn	81515	LYN proto-oncogene, Src family tyrosine kinase	0.0651938	0.00580423	0.0828688	0.182529	-0.0172052	0.119917	0.144025	-0.0638754	-0.0832551	0.114019	-0.0517119	-0.0645644	0.0083513	0.444411	0.326486	-0.010694	0.0663401	0.168656	0.0376777	-0.133559	0.0241875	0.0719782	0.0598162	0.0367605	-0.0874206	0.0226553	-0.0177948	-0.0916017	-0.205919	-0.0112942	0.0110446	-0.11509	-0.0694952	-0.0690719	-0.184718	-0.233515	0.022867	-0.0871865	0.180588	-0.125962	-0.036141	-0.0433872	0.514496	0.0234942	0.714208	0.0455235
1368680_a_at	Slc34a1	25548	solute carrier family 34 (type II sodium/phosphate cotransporter), member 1	-0.10209	0.0907962	0.113784	-0.0832097	0.014531	0.062687	-0.0281118	0.0667075	0.0466287	-0.0684354	0.106622	-0.105737	0.199085	0.0603666	0.173607	0.13366	0.244139	0.0481612	-0.0569514	-0.0805439	0.0772753	-0.0813806	-0.190398	-0.163757	0.0890678	0.0628366	0.0996031	0.125981	0.237946	0.0769954	-0.0573016	0.118578	-0.118592	0.0162917	0.091168	-0.0651978	-0.120998	-0.128468	-0.0979135	-0.214581	0.15515	-0.0259873	-0.0410513	0.180471	-0.102388	-0.335731
1368690_a_at	Grm4	24417	glutamate receptor, metabotropic 4	-0.12583	0.0300438	-0.162027	-0.0491149	-0.0160758	-0.120071	0.0154686	0.217669	0.0371901	0.0217899	-0.00824053	-0.0153352	0.140113	0.0670517	0.0935733	0.22935	0.130107	0.380046	-0.156824	-0.176341	-0.322125	-0.1508	-0.115192	0.0969222	-0.137852	0.0593598	0.0129784	-0.00432068	0.0216719	-0.0782916	-0.0854861	0.0667552	0.0583808	0.0199286	0.0764317	-0.101651	-0.0993208	-0.133057	-0.257784	0.0212707	0.0536873	-0.146282	-0.160403	0.0647662	0.00303456	0.0575984
1368692_a_at	Chka	29194	choline kinase alpha	-0.622618	0.0241302	0.0575432	-0.939832	-0.00826195	-0.0960351	0.230325	0.0260143	0.21493	0.0472489	0.307	0.157717	-0.367682	-0.365948	-0.142349	-0.745582	0.173892	-0.136374	0.0628412	0.311798	0.114961	-0.636311	-0.0108559	-0.00860561	-0.607239	-0.159153	0.116015	-0.785851	-0.0773098	-0.498075	-0.136751	0.250867	0.24711	-0.326106	-0.594243	-0.16422	-0.376021	0.0402236	-0.187558	-0.925928	-0.241109	-0.406648	-0.215214	0.0805074	-0.326039	-0.525549
1368693_at	Fgr	79113	FGR proto-oncogene, Src family tyrosine kinase	-0.180676	0.305906	0.228179	-0.536663	0.00890527	0.206168	0.0462149	-0.0529797	-0.129876	-0.190594	-0.166246	0.286528	-0.00634939	0.20679	0.384728	-0.265818	-0.109723	0.0242463	-0.0169292	-0.17222	-0.19833	-0.408461	0.058827	-0.232182	-0.544032	-0.17174	-0.373133	-0.431838	-0.0866514	-0.481758	-0.61715	-0.06356	-0.265704	-0.444538	-0.355843	-0.206968	0.152739	0.263746	0.354067	0.0139624	0.0518273	0.142796	0.311273	-0.179942	0.461191	0.0101944
1368696_at	Fxyd7	63848	FXYD domain-containing ion transport regulator 7	-0.185063	0.106715	0.106723	-0.238663	0.0269684	-0.0415223	-0.336752	-0.149015	-0.239569	-0.170031	-0.16708	0.033656	0.208456	-0.0163625	0.0577433	0.045703	-0.247905	0.0301501	0.0434242	0.302569	0.0884009	-0.124695	0.129046	0.167968	0.181702	0.251524	0.294131	-0.0152008	-0.110081	0.125511	-0.158166	0.138751	0.0280459	-0.221952	0.168557	0.0184292	-0.203051	-0.142308	-0.335914	-0.233215	0.0127852	-0.141594	-0.135855	-0.229108	-0.251661	-0.211499
1368698_at	Atp2b2	24215	ATPase, Ca++ transporting, plasma membrane 2	-0.506926	0.149002	0.181732	-0.847818	0.0304177	-0.0884627	-0.217062	-0.0566306	0.0907951	-0.545627	0.313515	0.159039	-0.465573	0.337786	0.3047	-0.980676	0.0480734	-0.297557	-0.0236462	0.112196	0.00707553	-0.396675	0.422635	0.221912	-0.264472	0.363282	-0.201319	-0.603888	-0.428144	-0.327438	-0.258726	-0.0772546	-0.363778	-0.278221	-0.141007	-0.397714	-0.364824	-0.185251	0.00946358	-0.679571	-0.274118	-0.392912	-0.616992	-0.0460089	-0.419595	-0.464873
1368700_at	Plcl1	84587	phospholipase C-like 1	-0.174069	-0.0951193	-0.180812	0.217454	0.0689056	0.272335	0.170113	0.246061	0.103915	-0.230039	-0.0587498	-0.186045	-0.427524	-0.172005	0.142871	0.270036	-0.0818818	0.0865577	0.329855	0.278533	0.277677	0.197809	0.0539116	0.316725	0.028979	0.28298	0.0388975	-0.0638906	-0.0834793	0.0808289	0.0768088	0.00649067	0.049302	0.010917	0.101836	0.152064	-0.0403162	-0.139087	0.0241935	-0.163695	-0.124142	-0.111228	-0.205212	-0.121495	0.0681864	-0.104603
1368702_at	Pawr	64513	PRKC, apoptosis, WT1, regulator	-0.109077	-0.115316	0.0803666	0.00147149	0.168293	-0.0543799	-0.202964	-0.247416	-0.0640221	0.00237074	0.214299	0.142873	-0.0184027	-0.110934	-0.257571	-0.0205159	0.0715494	-0.0746687	0.16776	-0.144073	0.00365954	0.0500104	-0.139773	-0.144911	-0.172554	-0.292365	-0.0704	-0.0842521	0.0199314	-0.0357804	0.306586	0.440566	0.195912	-0.129818	-0.238591	-0.0831647	-0.218814	-0.0160168	0.228149	-0.199515	0.261331	0.147675	0.178778	0.305362	0.222817	-0.115827
1368703_at	Pdlim5	64353	PDZ and LIM domain 5	0.22722	0.00306299	-0.128205	0.0949207	-0.00582567	-0.0391692	0.191502	0.0544616	-0.0070845	0.179105	-0.0703134	0.0553688	-0.283054	0.212285	-0.307864	-0.280293	0.0516617	-0.111459	0.0164021	-0.102221	0.0832689	0.123065	-0.0282107	-0.122121	0.0360211	-0.00585087	0.107056	0.168216	0.0776073	0.130833	0.098599	0.0400895	0.114087	-0.0617764	-0.00431724	-0.152149	-0.0563875	0.01674	0.106689	-0.104328	0.20003	0.0445183	-0.00289637	0.00393686	0.16137	0.292873
1368706_at	Tm4sf4	116467	transmembrane 4 L six family member 4	0.268701	-0.00444393	0.0545899	0.0574388	-0.0432167	0.0538415	0.195632	0.0939635	0.0588356	0.415295	0.0307607	0.0058472	0.0832292	0.114529	0.221812	0.0702027	0.114345	0.0749595	0.264669	0.0662787	0.291716	0.140051	0.0563015	0.120937	-0.289296	-0.0700933	-0.152924	-0.389749	-0.0794036	-0.0535675	-0.487773	-0.120517	-0.357744	-0.333673	0.104118	-0.078514	0.0367815	-0.108584	-0.0384071	0.0394033	-0.229864	-0.110648	-0.139811	-0.148722	-0.00298045	0.0212075
1368708_a_at	Drd2	24318	dopamine receptor D2	-0.267898	-0.0742452	-0.143523	0.0633262	0.118776	0.034318	0.207982	0.185802	0.0821423	-0.035619	-0.130965	-0.15864	0.156772	-0.161565	0.0484581	-0.0688415	-0.115354	-0.0466688	0.00479293	0.0834218	-0.0938109	-0.0505963	0.111389	0.0152786	-0.0588249	0.0478012	0.0191765	0.0675112	0.221819	0.297877	-0.0999954	0.126489	-0.0241064	-0.0581535	-0.106513	-0.0817449	-0.38796	-0.242301	-0.375823	-0.386988	-0.129827	-0.201374	-0.235287	0.0244985	-0.386587	-0.0739487
1368710_at	Mark2	60328	MAP/microtubule affinity-regulating kinase 2	0.228764	0.119386	0.185447	0.07558	-0.111591	-0.0253928	-0.0382776	-0.0947136	-0.097888	-0.236116	-0.220576	-0.248523	-0.0827105	0.384116	0.031072	0.0170186	-0.0258164	-0.00982579	0.197214	0.220315	0.233304	0.0814117	-0.00286755	0.0406832	-0.0759389	0.0337407	0.0910579	0.335601	0.0627309	0.253414	0.184251	-0.0592817	0.0262817	0.185022	0.14147	0.126544	-0.124575	-0.329376	-0.0282067	0.149803	0.103377	0.120287	-0.100581	-0.256501	0.025467	-0.000564733
1368711_at	Foxa2	25099	forkhead box A2	0.270103	0.604259	0.471946	0.069089	-0.111141	-0.37493	-0.227964	-0.0538672	-0.0901947	0.559587	0.295417	0.714043	0.57198	-0.836533	-0.352474	0.365557	0.462292	0.583455	0.0359115	0.842638	0.0977513	0.253138	-0.303475	0.580577	-0.0559592	0.107743	0.368975	-0.414943	-0.251528	-0.415037	-0.0683108	0.75547	0.294964	0.0770567	0.189966	-0.224117	-0.425582	0.358757	0.161409	-0.551793	-0.0280274	-0.103786	0.610082	0.300373	0.459256	0.171304
1368712_at	Zfp386	25165	zinc finger protein 386 (Kruppel-like)	0.0559346	-0.0040555	-0.144693	-0.0045682	-0.0608544	-0.1462	0.0113978	0.037711	-0.0119714	0.0584988	0.120364	0.0729911	0.125928	0.374695	0.205741	-0.21155	-0.0109395	-0.65625	-0.235807	-0.159964	0.0457906	-0.00832336	-0.0835208	-0.0240557	0.164309	0.154053	0.218291	0.164871	0.11347	0.139589	0.118301	0.0751963	0.282697	0.277227	0.0518762	0.140314	0.265894	0.088333	0.159015	0.129117	0.000193736	0.00967576	-0.084241	-0.0674628	-0.0718377	0.0958184
1368718_at	Aldh1a7	29651	aldehyde dehydrogenase family 1, subfamily A7	2.91084	-0.946012	-0.023952	4.93784	0.989483	0.0531137	1.94013	2.13081	1.99365	3.6934	1.17914	2.08255	5.29031	1.5434	0.65434	3.98471	0.267382	0.939405	2.92403	-1.14307	1.26271	1.39049	-1.13288	-0.586675	4.6355	2.98655	3.48535	2.96558	-0.405778	2.70622	1.80867	-1.30675	1.26957	3.77167	2.13566	1.86286	3.20727	1.83723	2.39778	0.985737	0.253568	1.67734	-2.70333	0.000957156	-0.503702	1.09639
1368725_at	Jag1	29146	jagged 1	0.00566272	0.427437	0.520432	-0.203327	-0.172087	-0.142672	-0.302921	-0.409133	-0.0305533	-0.163687	0.172048	-0.076198	-0.0368617	-0.0517062	-0.18271	0.0437425	0.147379	0.49422	0.0847919	0.0425512	0.0261795	-0.245012	-0.283463	0.315334	0.128242	0.0222806	0.154413	-0.294356	-0.259187	-0.153036	0.0564482	0.108428	-0.100068	0.020204	0.0877601	-0.0241536	-0.154685	0.466703	0.372664	-0.659597	-0.171171	-0.490447	0.168343	-0.038116	0.0770174	0.0706846
1368726_a_at	Zfp347	170902	zinc finger protein 347	-0.209147	-0.213758	-0.169059	0.0381262	-0.0588644	-0.0652499	-0.103471	-0.106136	-0.111965	-0.125269	0.112508	-0.0359249	-0.115228	0.161025	0.00571965	0.0380648	0.288307	0.0419566	-0.0590635	-0.0298413	0.14395	-0.0592367	0.14258	0.0801389	-0.0751454	-0.0548524	0.0614863	-0.177163	-0.040497	0.0304458	0.0211045	0.0739596	0.213429	0.0704777	0.123861	0.0828719	0.00656007	-0.152543	0.0685294	0.126721	-0.137512	-0.0979343	-0.0454348	0.166844	0.0865279	-0.0904597
1368731_at	Orm1	24614	orosomucoid 1	0.216756	-0.110173	-0.10666	0.164307	-0.128321	-0.0230023	-0.489757	0.0246876	-0.0887008	-0.255629	-0.0894841	-0.0239269	0.388005	-0.163523	0.350859	0.203159	-0.206846	-0.074135	0.108834	-0.121841	-0.119456	0.814111	0.0377033	0.0953734	-0.14304	-0.252519	-0.248068	0.123309	-0.0303307	-0.0399781	0.175527	0.161367	0.167433	-0.0304394	-0.235763	0.00145055	-0.0331523	0.256178	-0.0173591	-0.195665	-0.0406516	-0.119136	0.287684	-0.176556	0.374344	-0.0162497
1368732_at	Tap2	24812	transporter 2, ATP-binding cassette, sub-family B (MDR/TAP)	-0.0417186	0.123241	0.0024046	0.0874474	0.0579728	0.12077	0.0196726	0.0445712	0.0893213	0.00135151	0.100526	0.267961	-0.116828	-0.191223	0.109859	-0.310363	-0.100283	-0.248923	0.166447	-0.028717	0.032587	-0.327414	-0.0815648	-0.0965702	-0.277253	-0.0574156	-0.191653	-0.477285	-0.276753	-0.298726	-0.12432	-0.0519125	-0.203197	-0.168332	-0.00506518	-0.144224	0.246145	0.0355344	0.237492	-0.222622	-0.289495	-0.274321	0.204038	-0.164921	0.309161	0.111164
1368736_at	Tsx	29391	testis specific X-linked gene	0.735627	-0.104517	-0.267914	3.29391	0.150864	0.249408	-0.0622824	0.123808	0.0127696	0.23868	-0.0568978	0.112998	2.41526	0.26448	0.0476867	3.65772	0.0193739	0.212188	0.0703831	0.154843	0.0470663	1.43668	0.00403876	0.116821	0.114882	-0.215963	-0.0118013	0.146747	0.0603697	-0.0738897	0.486307	-0.169701	0.138684	0.0124992	0.210652	-0.0860782	0.628499	0.433136	0.698829	0.544911	0.712407	1.03818	0.600923	0.126202	0.370631	0.89401
1368740_at	P2rx6	25041	purinergic receptor P2X, ligand-gated ion channel, 6	0.0968806	0.181104	0.152907	0.0938924	0.207357	0.126164	-0.10499	-0.0390538	0.140617	0.084478	-0.0161422	0.140506	0.419582	0.00768763	0.0909813	-0.0613606	-0.0839665	-0.126239	-0.137814	-0.125877	0.0636717	0.0337341	0.115499	-0.112997	0.0154286	0.0431969	0.0897051	-0.105154	0.13694	0.21823	-0.0387589	-0.125033	0.03242	0.0992447	0.0414258	-0.0656458	-0.0534889	-0.0949077	-0.0959804	-0.0626087	-0.0935814	-0.116994	-0.0549532	-0.168534	0.016906	-0.0468909
1368742_at	C5ar1	113959	complement component 5a receptor 1	-0.49924	-0.0312598	-0.119161	-0.00944526	-0.07126	0.345021	0.260246	0.119438	-0.0689493	-0.295339	-0.29833	-0.158239	-0.00868921	0.317261	0.275298	-0.198979	0.10618	0.371213	-0.238397	-0.016137	-0.0238092	-0.127372	0.0472944	0.0206492	-0.0688714	-0.00733341	-0.159974	-0.0452708	0.0098174	0.140159	0.123082	-0.0631218	-0.0379645	0.047164	0.0539929	0.092447	0.558297	0.153585	0.436219	0.587801	0.180122	0.417576	0.795162	-0.110183	1.19841	0.682485
1368743_a_at	Dspp	25254	dentin sialophosphoprotein	-0.134166	0.00218579	0.112975	-0.379462	-0.235223	-0.246249	0.0238092	0.271647	0.172272	-0.0628979	-0.165339	-0.106976	0.119828	0.0303882	0.0284196	-0.198154	-0.0637164	-0.16918	-0.0136992	0.0115976	-0.20482	0.11035	0.131291	0.182398	-0.152005	0.121366	-0.0324814	0.0642292	0.00356458	-0.0242735	-0.116655	0.0396911	-0.0222755	-0.121311	-0.00454958	-0.109054	-0.221777	0.0653819	-0.299007	-0.206445	-0.0692208	-0.13297	0.0729402	0.205786	-0.0983904	0.202792
1368745_at	Slc10a2	29500	solute carrier family 10 (sodium/bile acid cotransporter), member 2	-1.60016	0.355968	0.250077	-1.80003	-0.0927409	0.53319	-0.73673	-0.231349	-0.499022	-0.657001	-0.017605	0.307724	-1.26896	0.0825076	-0.386389	-0.2006	-0.0966185	0.305733	-0.342794	-0.401564	-0.0177951	-0.0708888	-0.274032	-0.182922	-0.332344	0.14131	-0.129849	0.527439	0.332264	0.423993	-0.520621	0.0966853	0.180346	0.107597	-0.192459	0.0629062	-0.390282	-0.170433	-0.0749004	0.191597	0.202435	-0.415306	-0.234097	-0.169798	-0.517338	-0.239388
1368748_at	Tesk2	170908	testis-specific kinase 2	-0.127409	-0.159233	-0.0135145	-0.141583	0.0516947	-0.0405299	-0.0445808	-0.138598	0.0977836	-0.00330435	0.0623129	0.0587044	-0.0597879	0.256987	0.123497	0.0322843	0.136082	0.112413	0.41336	0.25839	0.209897	0.166413	0.076111	0.0365749	-0.0362135	0.0105472	-0.0127988	0.0591813	0.0510164	0.0372239	-0.0296212	-0.28904	-0.177442	-0.0191964	-0.0250763	-0.0177255	-0.0833498	-0.0838728	-0.18369	-0.145523	0.0316602	-0.121145	0.0698024	0.108088	0.199195	-0.260953
1368755_at	Clec4f	114598	C-type lectin domain family 4, member F	-0.238759	-0.0263024	0.0629419	0.282798	-0.214839	0.177548	0.402665	-0.067787	0.0570186	-0.191153	-0.269442	-0.100414	-0.248198	0.11158	0.349833	-0.344247	0.159423	-0.0750983	-0.0996642	-0.00894217	-0.116485	-0.294588	0.0247264	0.117188	-0.130394	-0.276967	-0.229785	0.0483822	0.132583	0.0122926	0.0148039	-0.366037	-0.110476	-0.00364973	-0.0993185	-0.0524154	-0.506603	-0.0781317	-0.0683614	-0.312576	0.00370362	-0.14838	-0.293283	-0.344019	-0.166664	-0.207614
1368759_at	Cacng2	84347	calcium channel, voltage-dependent, gamma subunit 2	0.111606	-0.28748	0.168854	-0.0472964	0.145128	-0.0705077	-0.0799241	0.309458	0.0110244	0.0244212	0.137426	0.172445	0.0621503	-0.177598	-0.113242	-0.174767	-0.118389	0.124745	-0.249805	-0.0651481	-0.192389	0.0172546	-0.225153	-0.0459826	0.15872	0.18277	0.143638	-0.0624719	0.081104	0.10316	-0.0869085	0.255042	-0.0408192	0.0585847	-0.00167156	0.0476953	-0.319283	0.0270332	-0.0880357	-0.0337064	0.0595078	0.0311367	-0.099142	0.337492	-0.137368	-0.179229
1368762_at	Ubd	29168	ubiquitin D	-0.313048	-0.409496	-2.04968	-0.9153	-1.24736	0.24849	-0.697826	0.894628	0.11204	1.84105	1.21762	2.26396	-2.07868	-0.34605	-2.41893	1.05104	0.121785	-0.125537	-0.057871	-0.801878	0.00465014	0.668674	-1.32427	1.3353	-1.6421	0.19494	-0.757334	0.0157024	-0.349229	0.733211	0.218583	-0.592533	0.642658	-0.238188	1.07912	0.504675	1.101	-0.840422	1.37308	1.83425	0.514789	0.765952	0.307638	-1.70546	-0.15159	0.257134
1368767_at	Cst8	29679	cystatin 8 (cystatin-related epididymal specific)	-0.199018	0.0553941	0.059329	-0.330701	-0.0447943	-0.0126905	0.0025225	0.012068	-0.127736	0.0138479	0.0360136	-0.104767	0.195666	-0.18688	0.118214	0.0264078	-0.120953	0.150607	0.0567338	-0.0102695	-0.15675	-0.0197654	0.145715	0.245821	-0.209166	-6.96019e-05	-0.17874	0.114643	0.157335	0.134607	0.0650192	0.298269	0.104732	0.0144366	-0.0598675	-0.128277	-0.139041	-0.0104666	-0.0585532	-0.240551	0.0685974	0.0567014	-0.122198	-0.0578469	-0.0128192	-0.114027
1368769_at	Abcb11	83569	ATP-binding cassette, subfamily B (MDR/TAP), member 11	0.566035	-0.0213398	0.0462404	0.285272	0.0132818	-0.0906905	0.195751	-0.0440765	0.004825	0.228373	-0.0311327	-0.0133068	0.378069	0.194696	-0.342217	0.323052	-0.07214	-0.0456543	0.223929	0.0833876	0.151299	0.446053	0.168315	0.151666	-0.28766	0.0402663	0.0197695	-0.340837	-0.0870836	-0.20457	-0.361623	-0.00457738	-0.0567877	-0.306529	-0.0555957	0.0535331	0.0230203	0.266533	0.014646	-0.230338	0.0691809	0.0327911	-0.0441872	0.119564	0.0850692	-0.0627937
1368773_at	Cenpi	25448	centromere protein I	-0.152279	0.00909636	0.115682	-0.120587	0.0773718	0.0798417	-0.330187	-0.171834	-0.0508845	-0.341131	-0.12407	-0.198372	0.0411567	0.0260127	0.0431292	-0.165876	-0.0945327	-0.0993115	-0.251275	0.211442	-0.2597	-0.423139	-0.142066	-0.228804	-0.0738512	0.0588894	-0.0324644	-0.0760688	-0.0633324	-0.00403268	0.212146	-0.134953	-0.188742	-0.0282103	0.0990065	0.0192939	0.207889	0.0296815	0.161689	-0.121934	-0.0753897	-0.15268	0.0193402	-0.0229768	0.0382226	0.217636
1368775_at	Giot1	171090	gonadotropin inducible ovarian transcription factor 1	-0.371857	-0.0587911	-0.258033	-0.168697	0.0180386	-0.304854	-0.0452173	-0.104552	0.178421	-0.145327	0.0259119	0.129726	-0.449499	0.404539	0.176887	0.10674	-0.0529217	0.324462	0.486413	0.344338	0.123455	0.029322	0.104974	0.383378	-0.257704	-0.252702	0.203662	0.265301	0.375186	0.378307	-0.34055	-0.271292	-0.14364	0.281427	0.246678	0.12626	0.0274359	0.100715	-0.169362	0.063413	0.259402	0.145631	-0.0633114	-0.233767	-0.148654	-0.00408813
1368778_at	Slc6a6	29464	solute carrier family 6 (neurotransmitter transporter), member 6	-2.10184	-0.151207	-0.926817	-2.32402	0.308467	-0.461694	-0.407752	0.659055	-0.0708343	-0.592613	0.176784	0.10373	-2.14422	0.30685	0.0912731	-1.85991	-0.704062	-0.116645	-1.19216	-0.778119	-0.286823	-2.35221	0.0975508	-0.818109	-0.794777	0.383671	0.346929	-1.01916	-0.0901046	-0.0393738	-1.46687	-0.473688	-1.27165	-1.61671	-1.22024	-1.6352	-0.587264	0.277823	0.666642	-0.00659454	-0.674724	0.0683902	-1.06704	-0.404585	-0.453524	-0.371427
1368779_a_at	Gucy1b2	25206	guanylate cyclase 1, soluble, beta 2	-0.904779	-0.0213041	-0.149733	-0.86739	0.00880613	-0.0927305	-0.358614	0.128873	-0.0196708	-0.318422	-0.0299667	0.0518503	-0.721448	0.0899829	-0.0318644	-0.60044	-0.220508	-0.232783	-0.11767	-0.117943	0.128642	-0.466196	0.110946	0.0204276	0.0709148	0.337159	0.204889	0.049778	0.0541043	0.0414312	-0.58548	-0.240341	-0.230276	0.114836	-0.136967	0.0429665	-0.770724	-0.32174	-0.667695	-0.648562	-0.136247	-0.389427	-0.619441	-0.0898988	-0.570254	-0.839686
1368780_at	Adrb3	25645	adrenoceptor beta 3	-0.0760671	0.0123457	-0.0782024	-0.23772	-0.010243	-0.0379835	-0.103027	0.0690842	0.0626121	0.125871	0.192418	0.160986	0.25699	0.0205768	0.0474085	-0.111898	-0.111882	0.0801543	-0.00805651	0.140088	-0.117479	-0.0165128	0.0192465	0.115006	0.127773	0.123127	0.0668358	0.049717	-0.0449408	0.128672	-0.0255489	0.0797379	0.129326	-0.0978666	-0.151781	0.0223389	-0.264023	-0.0594495	-0.195237	-0.174464	-0.111085	0.0696008	-0.0329797	0.112041	-0.156666	-0.0720694
1368784_at	A1cf	170912	APOBEC1 complementation factor	0.471865	0.182298	0.179516	0.183814	0.144571	-0.0483418	0.226581	0.0251945	0.105266	0.152839	-0.0724026	-0.134849	-0.39713	0.0640553	-0.472995	-0.160957	-0.0161611	0.159295	0.256347	0.0282749	0.443816	-0.0354895	-0.101991	0.0146361	0.421497	-0.0721115	0.316173	0.169111	0.0120759	0.131212	0.255374	0.0538659	0.263622	0.218416	0.0283417	0.166954	-0.201647	0.142789	-0.130918	-0.28646	0.132957	-0.0141603	-0.0632892	-0.00122427	-0.163577	0.0430682
1368789_at	Acpp	56780	acid phosphatase, prostate	0.114951	-0.000984623	-0.125653	-0.107725	0.112733	-0.319321	-0.506961	-0.0677205	-0.0814353	-0.518056	-0.441802	-0.139697	-0.0701101	0.0617858	0.154521	-0.577697	-0.106167	0.0370865	-0.0904097	-0.392861	-0.161448	0.00353644	0.0428789	-0.107604	-0.679254	-0.512797	-0.45967	-0.134395	-0.0605296	-0.141113	-0.509376	-0.15504	-0.204763	-0.292158	-0.351876	-0.245853	-0.240132	-0.108001	-0.330465	-0.44143	-0.109877	-0.157863	-0.239599	0.0338402	-0.0185899	-1.01602
1368797_at	Nr1i3	65035	nuclear receptor subfamily 1, group I, member 3	0.806573	-0.436554	-0.260859	0.623437	-0.0468793	-0.0580724	0.459532	0.0777778	-0.337124	0.75591	-0.693654	0.00892242	0.148584	-0.302623	-0.264309	0.905093	-0.497558	-0.16607	-0.3906	-0.28973	0.270985	0.515665	0.29584	0.487828	0.215899	0.177082	0.0948781	0.276582	-0.280461	-0.359285	0.116184	-0.163523	0.0460132	-0.741897	-0.337934	-0.830179	-1.11409	-0.22455	-0.277553	-0.317488	0.0668648	0.699097	-0.926325	-0.381671	-0.555087	-0.063506
1368799_at	Birc5	64041	baculoviral IAP repeat-containing 5	-0.353608	0.0369854	-0.193797	-0.119514	0.203664	0.232647	-0.426482	-0.0598999	-0.0326157	-0.449558	-0.076726	0.0441677	0.143186	0.220826	0.176181	-0.192289	0.0780536	-0.33146	-1.01272	-0.378147	-0.440849	-0.898133	-0.0427149	-0.2649	-0.142383	-0.0424938	0.0107065	0.0172075	0.0795708	-0.0533801	0.397447	-0.0642665	-0.298414	-0.365113	0.125043	-0.342554	0.62383	0.067815	0.751808	0.264559	0.0483114	0.10118	0.103543	0.166241	0.13994	0.324957
1368802_at	Pmch	24659	pro-melanin-concentrating hormone	-0.169512	-0.0563719	0.0751399	-0.181853	0.0220351	0.0127299	-0.0984711	0.115465	-0.0482541	-0.229345	-0.182274	-0.0762912	0.0158323	-0.146542	-0.137818	0.145452	0.0528458	0.267235	-0.0886862	-0.056547	-0.139445	-0.0703872	0.108311	0.0177591	0.117438	0.00183253	0.169123	-0.120377	-0.029042	-0.0973945	-0.0206339	-0.008711	-0.0551417	-0.0383842	0.088986	0.17132	0.0955283	0.162315	0.145729	-0.0773611	-0.0504441	-0.0657572	-0.129391	0.027222	-0.126693	-0.118935
1368804_at	Lif	60584	leukemia inhibitory factor	0.027165	0.0685296	0.177065	0.0105957	-0.0584337	-0.0696512	-0.264955	-0.111982	0.0823141	0.130327	0.121753	0.0559996	0.0970132	-0.174056	-0.0429291	0.209255	0.0168641	0.0784301	-0.317838	0.00564969	-0.249405	-0.0526376	0.109761	0.0253468	0.193627	0.143208	0.0447778	0.0431106	0.219777	0.178638	0.00633306	0.161574	0.102669	0.0770237	0.0682214	-0.0122173	0.0263797	0.11752	-0.198129	-0.287848	-0.0281263	-0.202089	0.0977282	0.12361	-0.231726	0.165884
1368807_at	Rtn3	140945	reticulon 3	-0.148407	0.0250098	0.0340964	-0.102538	0.0366953	-0.00774384	-0.240321	0.0993479	-0.0339237	0.108765	0.196265	0.193917	0.227639	-0.00102516	0.0562166	-0.0100402	-0.00581771	0.015637	-0.174101	0.00806764	-0.22246	-0.100741	-0.137548	-0.0680861	-0.0798864	0.127164	0.0423861	-0.0188445	-0.142107	-0.0508926	-0.0699826	0.0233048	-0.0310456	0.0456976	0.0863681	0.0227895	0.0273323	-0.00691326	-0.0351688	0.0187755	0.172249	0.0866076	-0.120953	-0.093344	-0.21808	0.180495
1368808_at	Cap1	64185	CAP, adenylate cyclase-associated protein 1 (yeast)	-0.0344873	0.0533282	0.00183655	0.0520887	0.0607159	0.0976406	0.0905054	0.0498401	0.0392009	-0.0774995	0.102835	0.100872	-0.0782376	0.298811	0.377588	-0.210919	-0.135518	-0.101561	-0.0237454	-0.232577	0.0163735	-0.322217	-0.148934	-0.129305	0.017435	-0.168526	0.011387	0.0690126	0.0073427	0.127135	0.320463	0.0750238	0.219141	0.0164572	0.0724174	-0.111601	0.307321	0.0354075	0.189563	0.304785	-0.0243026	0.224179	0.289146	-0.142867	0.363461	0.234083
1368814_at	Aldh6a1	81708	aldehyde dehydrogenase 6 family, member A1	-0.289111	0.0195584	-0.0374531	-0.228452	0.138981	-0.147654	0.0749422	0.132351	-0.0373106	0.172306	0.21921	0.051662	-0.176561	0.748167	-0.0854637	-0.0763322	0.0181763	-0.0598692	0.126401	-0.225504	0.221418	0.0367704	-0.0300839	0.00595107	-0.141248	-0.0660445	0.157364	-0.0623824	-0.0661158	-0.101314	-0.0413666	0.0356764	0.106106	-0.243611	0.0114696	0.00710444	-0.404518	-0.118158	-0.210093	-0.470639	-0.0681635	-0.246802	-0.18836	0.0581629	-0.159884	-0.130439
1368818_at	Psme4	498433	proteasome activator subunit 4	-0.208109	-0.19564	-0.126743	-0.183862	0.0411263	0.0801481	-0.15873	0.0195535	0.031212	-0.217686	0.0190501	0.0941189	-0.45132	0.0612361	-0.23961	-0.198117	-0.0747382	0.00502169	0.109245	0.0908894	0.405184	0.104426	0.234637	-0.156962	0.0774336	0.135027	0.00154169	-0.0365564	-0.160848	0.009959	-0.0392064	-0.0786009	-0.0657183	0.172459	0.0537684	-0.117605	-0.0927591	-0.000619327	-0.143453	-0.281819	0.0119454	-0.203992	-0.12613	-0.0941569	-0.117873	-0.333622
1368820_at	Nfyc	25337	nuclear transcription factor-Y gamma	0.0777326	-0.11072	-0.0543958	0.250684	-0.0181839	0.0399513	-0.0113024	-0.00614457	-0.129086	0.0956025	0.0505095	-0.0747813	-0.133625	0.0486235	-0.00981534	-0.159267	-0.0508264	0.0514408	0.068163	-0.166287	0.0469383	-0.00475444	-0.0918053	-0.0922123	-0.00994293	0.0796364	0.197837	-0.0363819	-0.16467	-0.0549365	0.0415927	-0.126354	-0.0588295	0.301175	-0.0174769	0.181806	0.194343	-0.0536244	0.0269906	0.108349	-0.158447	-0.192517	-0.0539664	0.000211136	-0.0771786	0.0340491
1368822_at	Fstl1	79210	follistatin-like 1	-0.401925	0.175771	0.215956	-0.400165	-0.0293297	0.10016	-0.0987913	-0.0177784	-0.221761	0.00275192	0.258085	0.257926	-0.339427	0.106082	-0.109756	-0.140767	0.0044957	-0.0706419	0.14271	0.17555	0.0989067	-0.366179	-0.0951312	-0.0918857	0.0605273	0.235783	0.0272907	-0.333217	-0.0754368	-0.163465	0.131273	-0.0273641	-0.0842372	0.010716	0.144982	0.163112	0.220765	-0.200061	0.159557	0.449522	0.0609985	0.518381	-0.158519	-0.0976796	-0.327681	0.386885
1368824_at	Cald1	25687	caldesmon 1	-0.168286	-0.0489524	-0.0397553	-0.0672643	0.0032014	0.0268181	-0.0468005	0.00581027	0.0525868	-0.14496	0.0368994	-0.0157314	-0.437558	-0.127748	-0.20859	-0.30281	0.0211122	-0.0519163	-0.14051	0.0925069	0.100336	-0.300942	-0.146947	-0.193847	-0.04936	0.0206653	-0.0235414	-0.213953	-0.0697568	-0.0901188	-0.122084	-0.0583504	-0.21122	-0.333575	-0.0285155	-0.293238	-0.0903614	-0.116284	0.0136289	-0.191432	-0.035795	-0.132783	-0.175065	-0.0483432	-0.140599	-0.0332229
1368826_at	Comt	24267	catechol-O-methyltransferase	-0.502823	-0.48494	-1.06729	-0.161041	-0.813797	-0.865992	-0.159844	-0.640347	-0.246994	0.395237	1.03386	1.80283	-0.487788	-0.31748	0.213076	-0.763871	0.0426062	-0.173635	-0.535357	-0.00731433	0.470611	-0.919884	-0.653022	-0.914764	0.102049	1.14644	0.219091	1.1617	1.10755	0.837463	-1.08734	-0.777011	-1.89132	-0.647625	-1.06351	0.42573	0.864145	0.764735	-0.237988	-0.119835	-0.804882	-0.225637	0.891039	1.61246	0.507965	-1.66438
1368829_at	Fbn1	83727	fibrillin 1	-0.819663	-0.207835	-0.146817	-0.672547	-0.231275	-0.0435926	-0.0377894	0.17091	-0.0907766	-0.326827	0.377266	0.386441	-0.218753	0.16979	-0.0255389	0.0223877	0.0376458	0.105272	-0.130741	0.115964	0.162103	-0.412783	-0.0181255	0.121272	0.144723	-0.0053924	0.0472281	-0.14989	-0.0369778	-0.0961849	0.283642	-0.136365	-0.309045	-0.0945092	-0.0516984	-0.116031	0.633624	0.119919	0.649429	0.806698	0.00501577	0.73656	-0.153215	-0.314622	-0.0270092	0.0484315
1368831_at	Mark3	170577	MAP/microtubule affinity-regulating kinase 3	-0.151096	0.00059258	0.060175	-0.251823	0.0717569	-0.0593919	-0.304506	-0.174099	-0.126262	-0.154094	-0.0666433	-0.058638	-0.238882	-0.111045	0.10049	-0.286011	-0.162222	-0.15444	0.146972	0.00236854	0.295501	-0.167125	-0.00987965	-0.101975	-0.104029	-0.162838	-0.262286	0.0914205	-0.0568726	-0.0190762	0.0647655	-0.181495	-0.0552172	0.11464	0.0133614	0.123726	-0.0992643	-0.0655303	-0.0714462	0.0243106	-0.0744068	-0.0238916	0.116098	0.0215396	0.205216	0.0598565
1368834_at	Camk2d	24246	calcium/calmodulin-dependent protein kinase II delta	-0.161161	-0.212006	0.0210524	-0.0394483	-0.301893	0.123229	0.0901907	-0.0078998	0.0318368	-0.432285	-0.104248	-0.0606127	-0.0742861	0.403966	0.243206	-0.146337	0.208121	0.178463	-0.0741743	-0.171155	0.0795978	-0.171024	0.019718	-0.0392163	0.00737879	-0.0546063	-0.100025	-0.222687	-0.211084	-0.260203	0.35641	-0.039144	-0.210339	0.0232969	0.0458329	0.0176383	0.471314	0.191712	0.744905	0.936943	0.265986	0.631798	0.444045	-0.309383	0.688257	0.550068
1368837_at	Arid4b	84481	AT rich interactive domain 4B (Rbp1 like)	-0.144958	-0.0563459	-0.0566981	-0.318199	0.0277449	-0.0133973	0.0784768	-0.149384	0.132093	-0.109201	0.122815	0.179341	-0.445594	-0.0935567	-0.144912	-0.066524	0.4284	0.136811	0.325664	-0.000269329	0.0862345	0.104532	0.0229451	0.000735942	-0.0995433	-0.160286	0.0140639	-0.0586821	0.0617982	0.103403	-0.167217	0.0717073	-0.0442898	-0.0443987	0.00115704	0.0481609	-0.218048	0.0548538	0.0798123	-0.246062	0.351631	0.0842753	0.137343	0.20269	0.260993	-0.113688
1368838_at	Tpm4	24852	tropomyosin 4	-0.346406	-0.150693	-0.189239	0.067448	-0.00338327	0.375801	-0.156006	-0.0923779	-0.0799769	-0.0645067	0.230724	0.189265	-0.165716	0.514672	-0.0555775	-0.119917	-0.0715303	0.132807	0.0674848	-0.188692	0.0194024	-0.0563998	0.134126	0.0965302	0.156406	0.0462476	0.247616	-0.336539	-0.0579893	-0.128606	0.239421	0.102169	0.0545641	0.0684207	0.0831172	0.107456	0.476065	0.0206597	0.447732	0.480011	0.184335	0.591782	0.581495	-0.0229528	0.893811	0.622129
1368842_at	Tcf4	84382	transcription factor 4	0.269026	-0.00022726	-0.0453025	0.252147	0.011493	0.27469	-0.0505468	0.153439	-0.141521	0.0111034	0.135703	0.129291	-0.481392	0.176007	-0.190164	-0.0906235	0.0465844	0.0989334	0.0305334	0.00782117	0.352992	0.250511	0.00732961	0.151604	0.0987693	-0.0508533	-0.0800744	-0.070661	-0.0599797	0.104681	0.0526202	-0.0817726	-0.134417	-0.0498987	-0.0859601	-0.105995	0.511009	0.0944	0.4457	0.425643	-0.0529961	0.481808	0.0663826	-0.0699912	0.223809	0.265177
1368844_at	Hspa13	29734	heat shock protein 70 family, member 13	-0.354141	-0.188146	-0.12957	0.115275	0.0694165	-0.0184761	-0.310957	-0.222686	0.0353799	-0.165434	-0.0131741	-0.0462486	-0.178638	0.264214	-0.138434	0.068042	0.162208	-0.224387	0.346191	0.0553614	0.462189	0.169493	0.0868117	-0.107261	-0.0033289	-0.200532	-0.175133	-0.0587417	-0.0688039	-0.0301445	-0.209075	-0.11607	-0.0464791	-0.0609998	-0.034445	-0.0526966	0.328528	0.183403	0.266315	0.347767	0.185313	0.111398	0.0373161	-0.0947416	0.000884528	0.246209
1368847_at	Rab10	50993	RAB10, member RAS oncogene family	-0.21322	0.0223272	0.105614	-0.00738414	0.110783	0.170811	-0.233813	-0.0478839	0.0264589	-0.0248887	0.000751084	0.047165	-0.472071	0.351181	-0.0805309	-0.294744	-0.145674	0.0867134	0.0672248	0.137095	0.246409	-0.0591786	-0.015931	-0.0889677	-0.152711	-0.115744	-0.168592	0.146983	0.0433433	0.159431	-0.129722	-0.141565	-0.13428	-0.0175361	-0.0773958	-0.0180247	0.0902556	0.0460827	0.0603784	0.16762	-0.0199145	0.187981	0.0306731	-0.0500397	0.00326713	-0.0770404
1368848_at	Lman1	116666	lectin, mannose-binding, 1	-0.368859	-0.154383	-0.0923072	0.147169	0.162839	0.0883937	-0.244625	-0.0893389	-0.00715671	-0.180635	0.163488	0.154684	-0.182376	0.702229	0.100619	0.0990359	0.0307048	0.0846716	0.369731	-0.0741867	0.435584	0.0964656	0.0777843	0.102003	0.112706	-0.0680929	0.302871	0.176034	-0.109158	0.0823531	0.216963	0.0283358	0.298354	0.308816	0.139343	0.113579	0.355597	0.0557592	0.117274	0.499789	0.0929329	0.208578	0.151572	-0.0806426	0.112399	0.201928
1368851_at	Ets1	24356	v-ets avian erythroblastosis virus E26 oncogene homolog 1	0.0762416	0.0605943	-0.0290438	-0.0078138	-0.0948889	-0.0377797	0.073037	0.0632018	0.0095442	0.0201399	0.03217	-0.0417937	-0.238886	0.132425	0.0308625	-0.0358674	0.132844	0.0800075	0.312602	0.0612233	0.266587	0.0516292	-0.119161	0.0309599	-0.232168	-0.131196	-0.11489	-0.243505	-0.133644	-0.157384	0.115034	-0.0978305	-0.147591	-0.105176	-0.152193	-0.201835	-0.0240333	-0.100583	0.0904013	-0.239572	-0.14128	-0.0718067	-0.115847	-0.197073	-0.116548	0.00715027
1368856_at	Jak2	24514	Janus kinase 2	-0.0661349	-0.0122549	0.0925708	0.284359	0.135395	0.259487	0.295072	0.0694048	0.186675	-0.0183579	0.204986	0.0934381	0.0476575	0.566137	-0.0933196	0.275677	0.360938	0.254956	0.0143962	0.100881	0.0557828	0.210613	0.0232227	0.102641	-0.0474388	0.0542291	-0.116668	-0.119827	0.000690215	0.0281418	0.233561	-0.112868	-0.155782	-0.0104732	-0.131821	0.135803	0.39666	0.236178	0.349625	0.57678	0.0716427	0.283195	0.562192	-0.167822	0.415197	0.635405
1368859_at	Ppm1a	24666	protein phosphatase, Mg2+/Mn2+ dependent, 1A	0.382173	-0.000262689	0.0810374	0.253465	0.124057	0.171578	0.203436	0.00775233	-0.127755	0.159739	-0.0745143	0.0170024	0.0843926	-0.179275	0.0420356	0.123991	0.075941	0.0692701	0.190733	0.0150193	0.214755	0.113464	-0.083471	-0.144182	-0.0331403	0.0186048	-0.0957252	0.0390065	-0.0767034	0.0381462	0.041711	-0.146124	0.0454627	0.105461	-0.194959	-0.128375	-0.0322516	-0.0264948	-0.0940606	-0.0315473	-0.10852	0.0117021	0.0772068	-0.0750897	-0.0199812	-0.0679205
1368861_a_at	Mag	29409	myelin-associated glycoprotein	-0.0107792	0.0823655	0.13397	-0.233959	-0.103145	-0.117337	-0.014607	-0.140641	0.115281	0.216661	0.163517	0.139782	-0.0297129	-0.15848	-0.105819	0.0317291	0.07011	0.356466	0.0938137	-0.18138	-0.179215	-0.094004	-0.10106	-0.132238	-0.0419019	0.0768238	0.00299531	0.1089	0.300696	-0.0332642	-0.158396	-0.0381247	-4.58538e-05	-0.0716813	0.0593973	-0.0219751	-0.115489	0.0510879	-0.0107036	-0.0611357	0.0168446	0.146667	-0.164938	0.0938208	-0.117791	0.233887
1368862_at	Akt1	24185	v-akt murine thymoma viral oncogene homolog 1	0.442373	0.135599	0.206567	0.360673	0.109305	0.281645	0.123122	0.125257	0.108395	0.254613	0.210349	0.247698	-0.274949	0.0873783	-0.0810436	-0.231695	-0.0892006	-0.156847	0.153172	0.0999153	0.0508323	0.0734601	-0.00618442	-0.0718025	-0.312248	-0.135911	-0.216459	-0.14806	-0.0939766	-0.0525993	0.0755797	0.0799454	-0.147855	0.0120054	-0.0375711	-0.049783	0.241275	0.0808045	0.114357	0.14641	-0.0397645	0.200655	0.229805	0.0523491	0.232065	0.239655
1368863_at	Nme3	85269	NME/NM23 nucleoside diphosphate kinase 3	0.0239027	0.05221	0.0198921	-0.338313	-0.0456673	-0.103908	0.18457	-0.0559791	0.0326	0.151205	0.0166199	0.00111195	-0.0757898	-0.140653	0.0565081	-0.00945329	0.0505255	-0.00559368	0.126045	0.0380033	0.00637247	0.000837254	-0.0301067	0.0178474	-0.164564	-0.204595	-0.218995	-0.26527	0.0100602	-0.126785	-0.2088	-0.0636893	-0.0429314	-0.052282	0.169624	0.0455076	-0.186655	-0.04069	-0.163382	-0.312875	0.130918	0.00266708	-0.2441	-0.0268455	-0.0706769	-0.000519541
1368867_at	Ago2	59117	argonaute RISC catalytic component 2	0.167178	-0.386108	0.0464663	0.011428	0.0766035	0.020366	0.0306232	-0.239775	-0.0166758	0.0380451	0.119266	0.0481091	-0.000441856	-0.448827	0.0314943	-0.186926	0.0660019	-0.216004	0.0591716	0.0949626	0.0105909	0.0645345	-0.250351	-0.127853	0.0657627	0.24538	-0.0446565	-0.238007	-0.104496	-0.0274073	-0.00372971	-0.09844	-0.254011	-0.319765	-0.173321	-0.260288	0.210019	0.0999341	0.466439	0.290992	0.0115065	0.237592	0.472828	0.0696205	0.675792	0.37343
1368869_at	Akap12	83425	A kinase (PRKA) anchor protein 12	-0.0317323	0.0354576	-0.143473	0.280499	0.0638414	0.17204	0.0517536	-0.0993118	0.0379984	0.154872	0.0274489	0.0713666	0.0286101	0.17619	0.0229983	-0.0268346	-0.167067	-0.00497521	0.280248	0.05439	0.205571	0.00364647	-0.181807	-0.0981064	-0.153799	0.0645535	-0.00554748	0.122647	0.130013	-0.128155	0.199049	-0.106426	-0.0761344	0.0593614	0.0674558	-0.123296	0.048928	-0.102546	0.048752	-0.100317	-0.133918	0.0791737	0.0989394	-0.087205	0.205571	-0.00749385
1368870_at	Id2	25587	inhibitor of DNA binding 2	0.347313	0.152106	0.506463	0.211303	0.870635	0.0248901	0.741486	0.351369	-0.344895	-0.404832	0.0741464	-0.244895	-0.174618	-0.340598	-0.0763925	0.0337375	-0.121487	0.121336	0.313492	0.166997	-0.0629336	0.612717	0.38649	0.419298	0.467228	0.623033	-0.110116	0.373245	0.465798	0.734913	0.201458	-0.556117	-0.357863	0.625539	0.695815	0.770977	0.12178	0.141164	-0.0406567	-0.45351	-0.12598	-0.134042	-0.225555	-0.584373	-0.652335	-0.1586
1368872_a_at	Homer2	29547	homer scaffolding protein 2	-0.0544327	-0.0456386	-0.0189489	0.0334953	0.128121	0.0683841	-0.265314	-0.0375162	0.215483	0.107201	0.194568	0.334179	-0.228137	-0.071321	0.164266	-0.128631	0.368262	0.182642	0.044099	0.355162	-0.0264704	0.103292	0.00575925	-0.154702	0.16009	0.398199	0.204702	-0.301309	-0.00221765	-0.0829602	-0.107531	0.0700243	-0.0316774	-0.29644	0.015135	-0.137598	-0.290905	-0.0566214	-0.202951	-0.214759	0.0806901	-0.0648112	0.0892816	0.0399015	-0.082156	0.0479615
1368874_a_at	Mafg	64188	v-maf avian musculoaponeurotic fibrosarcoma oncogene homolog G	0.367174	0.192351	0.337721	0.302448	0.320715	0.347587	0.0486537	-0.0830924	0.0899474	0.362909	0.107411	0.126346	0.222026	-0.116114	-0.0144904	0.261138	-0.0567739	0.0166449	-0.17843	-0.00541211	-0.0119681	0.248098	0.143083	0.0381328	0.171651	0.131033	0.164073	0.0322779	-0.0108439	-0.0550339	0.0173271	0.0297821	0.136219	0.130532	0.0833236	0.184734	0.0667415	0.130654	0.216131	0.157602	-0.0808575	0.209587	0.256274	-0.107235	0.0616669	0.33106
1368877_at	Zfp354a	24522	zinc finger protein 354A	0.210874	-0.930369	-0.377177	-0.377359	0.00536042	-0.141589	0.150233	-0.996014	-0.468308	-0.406757	-0.974537	-1.85755	-0.41562	0.94799	-0.488619	0.00601378	-0.285811	-1.08201	0.244547	-1.63108	0.31975	-0.694583	0.502417	-1.26407	-0.0564258	-0.46007	-0.485677	0.716599	0.825034	0.252879	-0.0114169	-0.632333	0.0419235	-0.538669	-0.210235	0.444088	-0.774046	-1.11349	-1.80092	1.06247	-0.386699	-0.116447	-0.854555	0.428979	-0.217714	0.0987492
1368878_at	Idi1	89784	isopentenyl-diphosphate delta isomerase 1	0.520039	-0.189938	-0.0765253	0.351658	-0.484995	-0.43064	0.0898228	0.409786	0.407876	0.266636	0.304859	0.0799517	1.19314	-0.148283	0.408792	1.21917	0.0344258	0.625207	0.359587	0.616215	0.762631	1.06518	0.145103	-0.0357011	0.175767	0.187587	0.0421487	0.267156	-0.0307214	0.719159	-0.441636	-0.250232	-0.170403	-0.543506	0.0159055	-0.124775	-0.533825	-0.0975597	-0.496232	-0.761818	-0.101612	-0.592049	-0.600495	-0.291507	-0.175374	-0.761291
1368879_a_at	Gnao1	50664	guanine nucleotide binding protein (G protein), alpha activating activity polypeptide O	-0.083186	-0.119905	-0.00617432	0.0197502	0.0356334	-0.00451932	-0.0660217	-0.146222	0.0247151	0.0472987	0.0148342	0.0742545	-0.0025243	-0.0849192	-0.0231235	0.0893127	-0.0837971	0.0790331	-0.16511	-0.00126334	-0.203873	-0.062065	0.0405429	0.128055	-0.0582889	0.00267966	0.0287601	0.0758192	0.00222733	-0.110353	-0.0945887	0.0904644	-0.0305211	0.0140668	0.123833	0.0792319	-0.203382	-0.101537	-0.118443	-0.0737093	0.0958531	0.0387929	0.217453	0.262636	0.100574	0.0864689
1368881_at	Bet1	29631	Bet1 golgi vesicular membrane trafficking protein	0.441424	-0.0889188	-0.0705876	0.585188	0.0180012	-0.068588	0.0545084	-0.0882418	-0.100122	0.247285	0.126004	0.0899932	-0.0786177	0.295421	0.0505139	0.196386	0.0898096	-0.0164466	0.364851	0.00508885	0.460493	0.107394	-0.0343157	0.0888459	0.437482	0.171168	0.346261	0.315689	0.0947269	0.188388	0.122747	-0.0365921	0.238313	0.354348	0.294944	0.111585	0.301668	0.0163977	0.0515136	0.441645	-0.00166882	0.114116	-0.0654344	0.0301147	-0.142416	0.0244187
1368882_at	St6galnac3	29758	ST6 (alpha-N-acetyl-neuraminyl-2,3-beta-galactosyl-1,3)-N-acetylgalactosaminide alpha-2,6-sialyltransferase 3	-0.289511	0.246343	-0.0562407	-1.00501	-0.56057	-0.390198	-0.00567	0.288277	0.741936	-0.502633	-0.00775211	0.520837	-1.05023	-0.364771	-0.802568	-0.964287	-0.0511563	-0.75865	-0.196078	-0.239722	-0.802704	-0.124752	0.583125	0.102899	-0.299329	0.186126	0.531014	-1.10099	-0.608153	-0.271156	-0.0608303	-0.104632	0.206732	0.136337	0.281067	0.00308504	-0.439471	0.00494232	-0.0125348	0.225632	-0.152159	0.44575	-0.16794	0.131343	-0.399565	0.558486
1368886_at	Map3k12	25579	mitogen activated protein kinase kinase kinase 12	0.600643	0.23369	0.302027	0.319449	0.0898249	0.149648	0.10834	0.0114064	0.0648453	0.107319	0.0792534	0.125906	-0.0398038	0.129627	0.00389255	-0.0857927	0.0354548	-0.00722254	0.0652663	-0.027724	0.0595295	-0.0107519	0.0023561	0.000595427	0.0184232	-0.0807307	-0.0241211	-0.155464	-0.0775428	-0.107708	0.137076	0.0221477	0.0236412	0.0348332	-0.113083	-0.0435603	-0.0682792	-0.0325345	0.0599057	-0.0506535	-0.00234243	0.000202695	0.146296	0.0338281	0.0543733	-0.0210699
1368889_at	Vti1a	65277	vesicle transport through interaction with t-SNAREs 1A	0.140868	0.0978745	0.0936982	0.313644	-0.0451714	0.0646954	0.113989	0.0940102	-0.155959	0.160537	0.159805	0.213106	-0.0605475	0.116366	0.0520417	-0.0610165	-0.128366	-0.233118	0.240617	-0.00442464	0.263769	0.126391	-0.116031	-0.132095	0.0674053	-0.0529922	-0.0194071	0.0552205	-0.109363	0.150197	-0.0459096	0.0566209	0.0671403	0.0834068	-0.0956507	-0.0342933	0.054321	0.028927	0.043221	0.173868	-0.0963012	-0.0101302	0.0332593	-0.0817225	0.125914	-0.0713999
1368894_at	Cap2	116653	CAP, adenylate cyclase-associated protein, 2 (yeast)	0.0373987	0.157728	0.0322235	-0.0669676	-0.0532486	0.043215	0.0298156	0.0978693	-0.000719797	-0.0431153	-0.0987956	-0.0535953	0.0643807	0.0292362	0.0173775	0.0390728	-0.0353904	0.0515861	0.0843075	0.134192	-0.0252482	-0.064324	-0.143618	0.0237725	-0.115038	-0.117523	-0.122101	-0.0261578	0.155109	0.0868399	0.0329063	-0.118536	-0.0831163	-0.0359019	0.0274188	0.201667	-0.000188456	-0.0200721	-0.147073	-0.0262344	-0.0299885	-0.111084	-0.150067	-0.0303677	-0.0824243	-0.0523876
1368896_at	Smad7	81516	SMAD family member 7	0.441037	-0.619054	-0.0848653	0.0521118	0.25076	0.0726063	0.52997	0.196028	-0.237612	0.19435	-0.0496146	-0.107715	-0.0266212	0.0400344	0.147707	0.223899	0.247423	0.11658	0.378294	-0.116539	0.386892	0.42002	0.150615	-0.0240723	-0.0583396	0.209599	-0.210107	0.0506758	0.0523342	0.00512573	0.0669099	-0.108826	0.0541798	-0.0315185	-0.377719	-0.127819	0.187769	0.00674492	0.0595429	0.100106	0.0735551	0.121856	0.272005	0.272638	0.0432285	0.0236153
1368907_at	Scamp5	65171	secretory carrier membrane protein 5	0.185917	-0.0648742	0.108846	0.32342	-0.106411	-0.0258439	0.0375534	-0.147949	0.117883	0.00898953	0.160508	0.245363	0.237716	0.14201	0.121206	0.500967	-0.0454269	0.275979	0.0124549	0.0159504	-0.170688	-0.0612707	-0.00867043	0.036919	0.0662982	-0.0498509	0.00782142	0.153026	0.0366051	-0.0281023	0.436095	0.170493	0.0753517	0.306289	0.126972	0.268767	0.307158	0.040898	0.204944	0.409732	0.0470645	0.274666	0.178702	0.0958988	-0.00636963	0.109307
1368911_at	Kcnj8	25472	potassium channel, inwardly rectifying subfamily J, member 8	-0.189005	0.0640856	0.117963	-0.176267	0.214906	0.256961	-0.206088	0.161026	-0.0129729	-0.479942	-0.0355642	-0.0176173	-0.20827	0.206187	0.073312	-0.207157	0.114367	0.186935	0.313308	0.258365	0.267372	-0.195477	0.0693004	0.106317	-0.358688	-0.117045	-0.0919825	-0.0374636	0.0102767	-0.219653	0.238545	0.0564594	-0.105823	-0.0110285	-0.0251219	-0.0647444	0.809082	0.525367	0.796944	0.87924	0.209118	0.606939	0.49295	-0.0631366	0.589188	0.516596
1368915_at	Kmo	59113	kynurenine 3-monooxygenase (kynurenine 3-hydroxylase)	-0.220479	-0.0960754	-0.15717	-0.577291	-0.152239	-0.203889	0.026829	0.0755905	0.066135	0.203003	0.107054	-0.0378618	-0.249319	0.204096	0.276021	-0.377442	0.14738	-0.00190508	0.171332	0.0517872	0.0939636	-0.0116658	-0.0437969	0.21558	-0.115923	0.128144	0.180861	-0.286405	0.0270622	-0.0562289	-0.413564	-0.107722	-0.0819562	-0.239821	-0.0165494	-0.0535673	-0.475426	-0.114558	-0.438884	-0.633098	-0.114055	-0.415423	-0.142836	-0.018198	-0.148146	-0.0193388
1368924_at	Ghr	25235	growth hormone receptor	-0.589408	-0.111186	-0.102375	-0.0910341	0.0443587	0.0117831	-0.228335	0.0914377	0.0462694	0.198488	0.386099	0.334967	-0.359253	1.01252	-0.247592	-0.319152	0.114015	0.0411036	0.196645	-0.208333	0.318048	-0.0466187	0.0629419	0.330336	-0.220544	0.072419	0.0340187	-0.0894255	-0.119375	-0.00760443	-0.361973	-0.0689573	0.0388073	0.0445425	0.0167028	0.101171	-0.100117	-0.0538744	-0.31255	-0.202801	-0.115267	-0.15053	0.109534	0.264518	0.0267664	-0.0271191
1368925_a_at	Arhgef7	114559	Rho guanine nucleotide exchange factor (GEF) 7	0.249939	-0.116256	-0.110108	0.231508	0.262329	0.183269	0.35137	0.223047	0.354837	-0.257017	-0.285486	-0.0497532	0.137987	0.267544	-0.0814534	0.251111	-0.100015	0.140688	0.0274242	0.155881	0.154462	0.428118	0.242424	0.0586777	0.228874	0.10385	-0.0142902	-0.0419588	-0.0413485	-0.121475	0.123128	0.242238	0.119929	-0.194342	-0.101899	-0.0367596	0.25597	0.15773	0.154143	0.120423	0.139703	0.247665	-0.238742	0.0645437	-0.0697387	0.247081
1368927_at	Esyt1	29579	extended synaptotagmin-like protein 1	-0.232771	-0.075077	-0.120687	0.194046	0.0884399	0.119631	0.0912996	-0.0970416	0.0208031	-0.167553	-0.183696	-0.289619	0.22513	-0.367777	0.130112	0.010167	-0.135703	-0.223521	0.0151112	0.0759519	-0.190924	-0.0674598	0.0424283	-0.0818557	0.139564	-0.00543631	-0.0350008	0.0743459	0.00416337	0.087769	0.147286	-0.0707007	0.0655508	0.104009	0.211346	0.162902	0.222553	0.0728328	0.109834	0.233277	0.00106256	0.162708	0.124177	-0.0638761	0.20595	0.220536
1368929_at	Nploc4	140639	NPL4 homolog, ubiquitin recognition factor	0.135565	-0.0406454	-0.0701201	0.251204	0.0211603	0.1447	0.0537925	0.0247437	0.0975923	0.203826	0.0294529	0.145799	-0.0113309	0.293271	0.0459103	-0.191501	-0.241795	-0.303845	0.202498	-0.111025	0.155057	0.098836	0.1334	-0.0241874	0.115985	-0.0503008	0.0550386	0.122359	-0.192345	-0.0714719	0.059667	-0.0720577	0.0294705	-0.0329832	-0.0344305	0.109135	0.0138589	0.00348628	-0.121218	0.24554	-0.0461305	-0.113126	0.340963	0.052597	0.112803	0.0228702
1368931_at	Sh3gl3	81921	SH3-domain GRB2-like 3	-0.546788	0.0968773	0.0688796	-0.143695	-0.0237788	0.000116801	-0.0723528	-0.0409153	0.121426	-0.368534	0.246385	0.148003	-0.432311	0.0752573	-0.0742274	-0.463638	-0.0231252	-0.113484	-0.11339	0.268117	0.110646	-0.709893	-0.12039	-0.325315	-0.117486	0.00595156	-0.126053	-0.182825	-0.0757528	-0.0137326	-0.14958	0.0633903	-0.0345614	-0.152578	0.12947	-0.168187	-0.257306	0.00096743	-0.112091	-0.204331	0.212275	0.062206	-0.00896527	0.0865119	0.123512	0.0917355
1368932_at	Rock1	81762	Rho-associated coiled-coil containing protein kinase 1	0.0060944	0.00980825	0.0158686	-0.0274316	0.213344	0.271563	-0.17111	-0.362945	-0.164461	0.210502	0.00577152	0.16239	-0.0541553	0.12721	-0.136313	-0.180162	-0.0198165	-0.139096	0.0264184	-0.212787	0.0326395	0.206327	0.2114	0.0985336	-0.157177	0.068836	0.0215863	-0.195241	-0.0764007	-0.162199	0.103631	0.0203799	0.0448611	0.00407863	0.0598562	-0.122367	-0.0462695	-0.108226	-0.176131	0.0303924	0.179005	0.0917331	0.194676	0.0537768	0.237191	0.200435
1368935_at	Camk2a	25400	calcium/calmodulin-dependent protein kinase II alpha	0.0559824	-0.0230205	-0.0548831	-0.225635	0.0124583	-0.0146181	-0.102707	-0.136274	-0.179291	-0.0379606	-0.0830948	-0.119081	-0.014681	-0.117921	0.0153255	-0.0297696	-0.099104	0.106172	0.205087	0.34682	0.13685	-0.0294629	-0.0523555	-0.112262	-0.0892922	-0.142355	-0.144485	-0.252975	-0.133768	-0.256248	0.10187	0.0142832	0.0558993	-0.0208719	-0.0214165	0.0971775	-0.23745	-0.0722803	-0.335203	-0.112767	-0.0671565	-0.0903466	-0.221968	-0.178082	-0.272452	-0.0509969
1368936_at	Txnl1	140922	thioredoxin-like 1	0.325497	0.130104	0.153231	0.342789	0.0242843	0.107967	-0.0500643	-0.114614	-0.0401721	0.0900276	0.016063	-0.0132344	0.113216	0.154604	-0.0734422	0.276405	0.0889922	0.0504084	0.188457	0.0781983	0.109244	0.0518412	0.0138945	-0.0905863	0.274313	0.0239543	0.0698195	0.250735	-0.000814117	0.182842	0.198409	-0.0408453	0.0580987	0.188667	0.0574545	0.0131077	0.0937383	-0.0724504	-0.0123167	0.188519	0.0588578	0.164872	0.0679459	-0.080572	-0.0584005	0.0504187
1368938_at	Dll1	84010	delta-like 1 (Drosophila)	0.0273698	0.0146674	0.275325	0.0661488	0.118125	-0.0793925	0.0189805	0.157541	-0.156063	0.122037	0.192753	0.0123696	-0.216475	-0.136624	0.0137041	-0.194001	0.100082	0.399139	-0.0301128	-0.0549597	0.116302	0.0856731	0.0322914	0.0503071	-0.196047	-0.119957	-0.106433	-0.327303	-0.277795	-0.119868	-0.158021	-0.139576	-0.295224	0.0657861	0.0892858	-0.0453054	0.0264731	0.0657294	-0.0106245	-0.0484513	0.112887	-0.187312	-0.26851	-0.33124	-0.258652	0.073294
1368940_at	P2ry2	29597	purinergic receptor P2Y, G-protein coupled, 2	0.303612	-0.0269344	-0.175647	0.433177	-0.142897	0.163893	-0.381844	0.21458	0.152468	-0.0793879	0.0401679	-0.0817467	0.212292	0.308245	0.221931	-0.0164123	-0.219718	-0.262619	0.52533	0.346263	0.121312	0.399841	0.0598651	-0.110513	0.285249	0.593855	0.14581	0.0741644	0.0187011	-0.00432116	-0.458616	-0.234668	-0.298734	0.209615	0.185905	0.563729	0.295332	0.301269	-0.121059	-0.25303	-0.352051	-0.136483	0.129889	0.00399104	-0.0214487	-0.000775019
1368944_at	Dlg1	25252	discs, large homolog 1 (Drosophila)	0.220079	-0.110846	0.045168	0.157111	0.156659	0.0315782	-0.00415632	0.0322098	0.0540423	0.322343	0.183665	0.0528279	0.0113633	0.728661	-0.0942938	0.0955254	0.292435	0.274075	0.255972	-0.279404	0.401851	0.102054	-0.0971428	-0.0670169	-0.125912	0.129168	0.0737744	-0.41629	-0.186245	-0.0875551	-0.098146	-0.134022	-0.114034	-0.0771998	0.0193729	-0.0440701	0.0835411	-0.0167833	-0.0620676	-0.268152	-0.107122	-0.187961	-0.0462451	-0.075387	0.188197	0.0349047
1368945_at	Bmp2	29373	bone morphogenetic protein 2	0.510988	-0.00127837	0.124748	0.42059	0.0623605	0.222815	0.269554	0.127302	-0.118552	0.0029495	0.134846	0.181835	-0.0384023	0.187177	0.104002	0.132289	0.0682998	0.0291139	0.2401	0.242064	0.539144	0.274895	-0.207295	-0.34431	-0.180591	-0.160322	-0.153894	0.0872836	0.0758356	0.1579	-0.121724	-0.127869	-0.0594706	0.105693	0.0228486	-0.0873761	-0.15927	-0.0860548	-0.178405	0.127518	0.135455	0.327262	-0.124814	-0.254763	-0.103862	0.336205
1368947_at	Gadd45a	25112	growth arrest and DNA-damage-inducible, alpha	0.828608	0.754647	0.186972	-0.0674172	-0.849264	-0.238539	-0.215813	-0.674568	-0.268825	0.352598	0.0906191	0.106802	1.21705	0.294363	0.120531	0.814834	-0.140076	0.0696676	0.217343	0.201748	0.0724677	0.877801	-0.505291	-0.0884231	0.484487	0.0718887	0.2528	0.30433	0.176506	-0.469784	0.261434	0.280251	0.142507	0.0308025	0.453227	-0.345376	0.335647	-0.195761	0.27632	1.269	0.00274746	0.833551	1.29872	0.193568	0.732816	1.0449
1368948_at	Msn	81521	moesin	-0.106959	-0.0167147	0.0223708	0.191638	0.0930985	0.126145	0.0332758	-0.122122	-0.098548	0.0324388	0.142209	0.208211	0.0503052	0.420926	0.0173929	0.0290801	-0.117402	0.0206816	-0.0941708	-0.210146	0.0124153	-0.247889	-0.0446394	0.0652935	-0.161527	-0.308585	-0.171689	-0.0297727	-0.108249	-0.0462457	0.121613	-0.13752	0.0339086	0.0778877	0.198705	0.0612302	0.697069	0.249962	0.381785	0.46893	0.248036	0.144635	0.578555	-0.13647	1.02016	0.370253
1368953_at	Uggt1	171129	UDP-glucose glycoprotein glucosyltransferase 1	0.411955	0.0414398	0.0815863	0.61659	0.00878948	0.132293	0.0480244	-0.00220559	0.068893	-0.0443654	0.0967745	0.126908	-0.115538	0.554091	-0.113954	0.299849	-0.135799	0.00766751	0.362422	0.0504551	0.414847	0.151565	-0.222163	-0.21279	0.537773	0.150822	0.362071	0.5782	-0.0520134	0.291538	0.695977	0.0281224	0.311741	0.642491	0.284592	0.256564	1.02266	0.13716	0.587627	0.894515	0.178558	0.489386	0.376342	0.0169346	0.438079	0.614996
1368957_at	Gng7	58979	guanine nucleotide binding protein (G protein), gamma 7	-0.151388	-0.0901145	0.0989266	0.00939093	0.253642	-0.0437467	0.123928	0.0672059	0.130532	-0.115527	-0.165521	0.0122669	0.438541	-0.0101365	0.0492446	0.0189779	-0.132578	-0.179637	-0.0214556	-0.00499366	-0.119508	-0.0358449	-0.0157431	0.0380151	-0.0737485	-0.0478522	-0.047313	0.0677155	-0.0141688	0.137756	-0.0532458	0.224242	0.121483	-0.030693	0.0638025	-0.0962856	-0.142482	0.114834	-0.0714452	-0.248347	-0.00351634	-0.116095	0.0883123	0.0523079	0.192836	0.0048749
1368960_at	Lgals8	116641	lectin, galactoside-binding, soluble, 8	-0.228746	-0.0693981	0.0746401	0.0803571	0.149234	0.195671	0.107252	-0.00893729	0.00332201	0.104314	-0.0798229	0.0440822	0.103096	0.130872	-0.216875	0.205729	-0.118348	-0.122926	-0.0995024	-0.0767266	0.152142	0.0331987	0.0315386	-0.152888	0.43658	0.0382684	0.315847	0.351668	-0.0896302	0.126786	0.215135	-0.0973938	0.0307269	0.0820819	-0.0628512	-0.0391023	0.00253905	-0.028698	0.00885924	0.231189	0.187865	0.152101	-0.187732	-0.0859141	-0.0844363	-0.0343585
1368964_at	Lrrn3	81514	leucine rich repeat neuronal 3	0.249302	0.223876	0.307558	-0.0667096	-0.0511157	0.184057	0.0765933	-0.0973913	0.459015	0.130503	0.0195804	0.336385	-0.197135	-0.0645036	-0.119777	0.239226	0.152231	0.267024	-0.0618802	-0.20781	0.318799	-0.0494797	-0.237086	0.208749	-0.0127515	-0.0775607	-0.241413	-0.103635	0.0823021	-0.190113	0.102342	-0.190106	-0.418189	-0.383965	-0.12791	-0.371022	0.171692	-0.140307	-0.0937123	0.301258	-0.181905	0.0765604	-0.196488	0.238856	0.0450077	0.0356427
1368967_at	Eif2b3	171145	eukaryotic translation initiation factor 2B, subunit 3	0.450669	0.00987078	0.240752	0.681401	0.201251	0.228502	0.0433975	-0.0396344	-0.0039665	0.151934	-0.251225	-0.173623	0.465995	0.0140602	0.0350542	0.370644	0.182089	0.0632706	0.535252	0.212962	0.32896	0.29335	0.239197	0.248343	0.507254	0.240022	0.25693	0.478916	-0.0329667	0.235519	0.344971	-0.213338	-0.0618319	0.518797	-0.0294251	0.204176	0.580489	0.185479	0.220767	0.623707	0.128336	0.395441	0.319069	-0.115989	-0.0177586	0.131401
1368971_a_at	Synj2	84018	synaptojanin 2	0.471288	0.268075	0.0658077	0.644444	0.331093	0.63163	-0.315892	-0.27226	-0.0406211	0.47405	0.0106745	0.286456	-0.296031	-0.0733764	0.0167644	0.280059	0.313799	-0.0884867	0.136614	-0.0326013	0.0847713	0.235589	-0.103792	0.153914	0.161196	0.293125	-0.00905237	0.0689905	-0.0416137	-0.0499541	0.0344003	-0.0619789	0.120557	0.126843	-0.380735	-0.144115	0.143499	-0.0321298	0.0678893	0.0525501	-0.123773	0.104476	-0.0621756	-0.123019	-0.103383	0.246186
1368976_at	Cd38	25668	CD38 molecule	-0.1236	0.0314716	0.142701	0.273277	-0.423272	-0.124127	0.251113	-0.0998844	-0.174944	0.253396	0.27881	0.243781	-0.00745902	0.801483	0.151648	-0.129144	-0.318323	-0.109786	-0.200651	-0.0584264	0.0391252	0.20408	0.211521	0.332909	-0.0120549	-0.253056	-0.0786999	-0.0783253	-0.236959	-0.13967	0.247172	0.0237616	0.152859	0.145826	-0.151055	0.134869	0.129915	-0.059783	0.40016	0.231583	-0.125004	0.270163	0.0149378	-0.347867	0.463087	0.231518
1368977_a_at	Timm10b	84384	translocase of inner mitochondrial membrane 10 homolog B (yeast)	1.01574	0.0860063	0.301763	0.992774	0.0769144	0.214584	0.255359	-0.0939038	-0.0614741	0.807627	-0.0538233	0.0902668	0.331276	-0.0505282	-0.000434325	0.694623	-0.0977002	-0.0268291	0.569629	0.175195	0.400403	0.713053	0.00822963	-0.103786	0.351419	0.0168892	0.0504519	0.208659	0.0738626	0.188708	0.044025	0.0576041	0.150979	0.21737	0.145277	0.151475	0.486481	0.027053	0.168484	0.692118	0.291958	0.36327	0.343458	0.0300823	0.42503	0.432468
1368980_at	Plce1	114633	phospholipase C, epsilon 1	-0.31743	-0.120476	0.0746805	-0.350263	-0.22067	0.053749	-0.157729	0.20569	-0.267659	-0.532758	-0.129018	-0.322372	0.0531179	0.484603	-0.00378141	0.0254929	-0.0705374	-0.093487	-0.496505	-0.244522	-0.00940632	-0.0676757	-0.0603583	-0.350291	-0.0661172	-0.00817002	-0.0946443	-0.167551	0.0260722	-0.143221	-0.143356	-0.0365571	-0.00690928	-0.185606	-0.0298227	0.315538	0.0982537	-0.202574	-0.17794	-0.00750642	-0.0374065	0.162962	-0.0255157	-0.0610545	0.117922	-0.0364721
1368982_at	Pkia	114906	protein kinase (cAMP-dependent, catalytic) inhibitor alpha	-0.0843424	0.0772029	-0.0370672	-0.320878	-0.156287	-0.155388	-0.11907	0.0315534	0.0314617	-0.0830227	-0.0315778	-0.185396	0.0449353	-0.0210666	-0.244363	0.289211	0.00617804	0.230072	0.0349659	0.140674	-0.0997289	0.047004	0.147907	0.0747071	0.153682	0.203739	0.118579	0.0077086	0.115454	0.00922043	-0.229387	-0.0853176	-0.19834	-0.0573221	0.120084	0.255434	-0.119405	0.121308	0.00197944	-0.0530915	0.00308714	-0.161233	0.104746	0.101216	-0.12287	0.0768247
1368984_at	Sept2	117515	septin 2	0.0120879	-0.0864702	-0.102335	0.254926	0.148468	0.301752	-0.0308851	0.0383784	0.145585	0.0283409	0.173061	0.103229	-0.285772	0.624606	0.18647	0.0396672	0.0390968	0.12296	0.150193	-0.336194	0.298887	-0.0671111	-0.139489	-0.119345	0.00177601	0.0258379	0.0948051	0.0701552	0.016647	0.0799166	0.258468	-0.0666148	0.076558	0.0154601	0.0525643	0.0393425	0.451547	0.0476546	0.297237	0.328768	0.0707404	0.18221	0.0397862	-0.115774	0.164482	0.0514435
1368987_at	Slc17a7	116638	solute carrier family 17 (vesicular glutamate transporter), member 7	-0.176303	-0.0659777	-0.0252361	-0.00439774	0.175261	0.00948921	0.00273976	-0.0827483	0.0128475	-0.0830062	0.145075	-0.0853712	0.30746	-0.304831	-0.0307547	0.0362065	-0.0285683	0.234665	0.0177725	0.170169	-0.0900496	-0.00960023	0.0389688	0.0978346	0.00785076	0.0399919	0.0352829	-0.0963159	0.113932	0.0615999	-0.0779147	0.074932	0.0594355	-0.208284	-0.0878137	-0.106758	-0.245724	-0.10208	-0.18893	-0.0419675	0.174538	0.061826	-0.0649211	-0.148317	-0.16663	0.157305
1368991_at	Smpd3	94338	sphingomyelin phosphodiesterase 3, neutral membrane	-0.241425	-0.0883654	-0.031499	0.1142	0.1705	-0.0872348	0.277821	0.294299	0.231605	-0.346283	-0.0771375	-0.193281	-0.227276	-0.233823	0.465313	-0.077251	-0.0766424	0.368318	0.204609	0.354051	0.33732	0.123453	0.257304	0.390367	-0.248668	-0.095003	-0.208054	-0.334755	-0.351272	-0.325288	-0.595127	-0.123469	-0.429144	-0.418392	-0.157673	-0.466251	-0.434246	-0.1208	-0.443474	-0.343368	-0.173502	-0.219332	-0.383547	0.318579	-0.270574	0.0110759
1368992_a_at	Srsf5	29667	serine/arginine-rich splicing factor 5	0.00310724	0.086358	0.0878657	-0.0371021	-0.124653	0.0601291	0.0101111	-0.0325089	0.0212484	-0.0211153	-0.0444216	-0.159417	0.0424841	0.226394	0.0973577	-0.11533	0.0512733	-0.209028	-0.358998	-0.0820452	-0.127176	-0.212487	-0.22722	0.0698188	0.115931	0.0304472	0.226606	0.0494799	-0.0369554	-0.103424	0.0566831	0.00105564	-0.0047057	0.0192122	0.0339277	-0.0408488	-0.0407303	-0.015302	0.0836421	0.122832	-0.0753722	-0.111059	-0.0737067	0.0308342	-0.111253	-0.233466
1368993_at	Tenm2	117242	teneurin transmembrane protein 2	-0.458712	-0.0149606	0.0188998	-0.38174	-0.196116	-0.109142	-0.0966651	-0.185907	0.0110544	-0.323291	0.256934	-0.137565	0.168443	0.0464879	0.2142	-0.302297	0.154355	0.51317	-0.166944	-0.0707748	0.042767	-0.37063	0.061872	-0.0550453	-0.355309	-0.258024	-0.171223	0.112122	0.125041	-0.00761683	-0.132595	-0.167069	-0.169043	-0.209746	-0.277269	-0.203719	-0.362291	-0.130049	-0.277577	0.126612	0.195209	0.226615	-0.178239	-0.111926	-0.0212975	-0.0449464
1368997_at	Tceb3	25562	transcription elongation factor B (SIII), polypeptide 3	0.0261142	-0.134876	0.0391759	0.141577	-0.0616152	0.167529	-0.0442628	0.0699958	0.0741889	-0.303494	-0.080228	-0.0670466	-0.346344	-0.121687	-0.174537	-0.243381	-0.117039	0.0533501	0.106996	0.0417645	0.260315	-0.100394	-0.0558625	-0.0529217	-0.0298883	-0.135726	0.0827611	-0.0498554	-0.169534	-0.277812	-0.139314	-0.11338	-0.120718	-0.064615	0.049062	-0.0368998	0.0850801	-0.088425	-0.179145	0.0761318	-0.0676594	0.00238682	0.0363878	-0.01662	0.30836	0.204376
1368999_a_at	Begain	79146	brain-enriched guanylate kinase-associated	-0.317682	-0.201341	-0.0983944	-0.193621	-0.0173989	-0.00839031	-0.144909	-0.118277	-0.0637984	-0.0182856	-0.0952729	0.0766208	0.0489799	-0.111301	-0.180297	0.121387	-0.174996	-0.0907001	-0.274787	-0.0857723	-0.335214	0.0792921	0.037262	0.220294	-0.0936153	-0.0589469	-0.105929	0.0138164	0.246554	0.062711	-0.13374	0.0730493	0.00642153	-0.06524	0.111227	-0.034233	-0.0844588	-0.000742828	-0.0325562	-0.0240303	0.275142	0.0793749	0.142982	0.192489	-0.089191	-0.016097
1369003_at	Dedd	83631	death effector domain-containing	-0.0117011	0.288111	0.434479	-0.182222	0.314914	0.2111	0.159226	0.0125247	0.345466	-0.488058	-0.138978	-0.228799	-0.228276	-0.167722	-0.0623926	-0.173652	-0.0150519	0.109615	0.18416	0.369999	0.463534	-0.378241	-0.211881	-0.39107	-0.141215	-0.0929324	-0.277394	0.10219	0.332704	0.218833	-0.0236353	0.197027	0.223462	-0.0819198	-0.109516	0.0309478	0.00523446	0.0852952	0.213049	0.0046263	0.181522	-0.0397247	0.232265	0.135127	-0.0672337	0.106409
1369006_at	Hk2	25059	hexokinase 2	-0.0220346	0.193673	0.158877	0.0757742	-0.091606	0.0768999	-0.0143892	-0.0791067	-0.089576	-0.00376248	0.0381316	0.0506218	0.381073	-0.0187558	-0.0424879	0.195241	0.0719344	0.289792	-0.00693786	0.048672	-0.278595	-0.183154	-0.0853356	0.00668824	0.080448	0.00111245	-0.0954898	0.0320633	-0.0533433	0.107133	0.0228354	-0.120393	-0.165344	-0.182248	-0.0876149	-0.152896	0.154805	0.135082	0.108958	0.165981	-0.0111901	0.03001	0.0751328	0.0604344	-0.0922265	0.330001
1369014_at	Nf1	24592	neurofibromin 1	0.03315	0.165326	0.0385635	0.135837	-0.0018716	-0.115493	-0.0204394	0.0757749	0.0623907	-0.122535	0.0632851	0.0137755	0.357186	-0.127461	0.0490776	0.169488	-0.0288502	0.0393613	-0.312361	-0.0237635	-0.277047	-0.13719	0.0478081	0.151727	-0.0414772	-0.0238686	0.0601932	-0.193716	0.0365104	0.0259256	-0.122019	0.0282436	0.136585	-0.17789	0.175677	-0.0975432	0.0165507	0.0682621	-0.0788925	0.0303786	0.0396913	-0.00162362	-0.228616	-0.206766	-0.314638	0.110371
1369018_at	Foxm1	58921	forkhead box M1	-0.285946	-0.0982511	0.0984852	-0.36349	0.00496533	0.0382384	-0.261538	0.0192333	0.0855602	-0.218788	0.221243	0.0865393	-0.163534	0.102713	0.00723297	-0.137801	0.125621	-0.157777	-0.675031	-0.340227	-0.273179	-0.576351	-0.122829	-0.191518	-0.239508	0.0790594	0.0801012	-0.0658575	-0.22434	-0.0883739	0.211428	-0.033982	-0.281679	-0.198496	0.130125	-0.165938	0.483393	0.140754	0.541091	0.25498	0.269062	0.375921	-0.0646628	0.194906	-0.0239824	0.108949
1369020_at	Slc5a5	114613	solute carrier family 5 (sodium/iodide cotransporter), member 5	-0.133175	-0.20343	-0.164834	0.0162539	0.0403623	0.159855	-0.160595	-0.133613	-0.0930809	-0.0699809	0.0410585	-0.0436592	0.266266	-0.0671614	-0.0303453	0.201416	0.0737787	0.0040274	-0.217939	0.0252644	-0.293002	0.0576584	0.081378	0.18103	0.108589	0.0218484	-0.0859981	-0.0610936	-0.00678147	-0.0813703	-0.0347744	-0.0405924	0.119258	0.150727	-0.0491728	-0.0667649	0.00380495	-0.011491	0.0356326	-0.107853	-0.0754955	-0.0472976	-0.189341	-0.126857	-0.0234351	-0.3305
1369024_at	Rabep2	80754	rabaptin, RAB GTPase binding effector protein 2	0.277753	-0.0500659	-0.122312	-0.0167805	-0.0518342	-0.102341	-0.0754142	-0.0835034	-0.177454	0.106288	0.111465	0.118031	-0.151444	-0.0407824	0.178383	-0.147337	-0.0568243	-0.22957	0.206747	0.185516	0.223072	-0.123946	-0.306714	-0.163354	0.228239	0.214481	0.0531622	-0.0560679	0.0344062	0.0319815	-0.0425313	-0.00433876	0.00155831	-0.15609	-0.124992	-0.164069	0.0635409	0.0559594	0.0716962	-0.039855	0.084325	0.0270389	0.0537288	0.0506107	0.10381	0.065717
1369026_at	Arfip1	60382	ADP-ribosylation factor interacting protein 1	0.0260683	0.028443	0.00620794	0.247413	0.334805	0.338806	-0.149003	-0.0471084	-0.0207121	0.169721	0.0984337	-0.0270286	0.0719446	0.395147	0.146763	0.0492969	0.209143	0.0792514	0.296159	-0.000436951	0.153209	0.299137	0.0981365	0.0495793	-0.0360086	-0.0408875	0.0515293	0.183819	-0.0994452	-0.179149	0.231936	0.065234	0.210411	0.220179	0.136841	0.230046	0.230213	-0.0922673	0.0340007	0.128759	0.0968285	0.0693482	0.116696	-0.131281	0.0369223	-0.0958275
1369029_at	Plscr1	117540	phospholipid scramblase 1	0.311146	0.227295	0.282139	0.755309	-0.162032	0.241345	0.292706	-0.0361214	0.095823	-0.28728	-0.0584233	-0.0921318	0.0616055	0.514986	0.294033	-0.0810926	0.37312	0.53134	-0.139395	0.226474	0.283575	-0.459699	-0.170123	0.221791	-0.0584164	-0.136831	-0.0880253	0.0460322	0.125974	0.0722074	0.620143	-0.0762139	0.0837083	0.0475255	-0.270216	-0.177967	0.614169	0.0244001	0.785709	0.800466	0.120888	0.47214	0.963006	-0.430272	1.36702	0.506502
1369031_at	Il18bp	84388	interleukin 18 binding protein	-0.196957	-0.0161452	-0.0586614	-0.12806	-0.114395	-0.0341188	0.305878	0.189919	0.219176	0.209051	0.126766	0.368311	-0.343133	0.180627	0.285187	-0.548765	0.0639136	0.0147957	-0.231077	-0.126491	-0.274754	-0.467285	0.019013	0.0369463	-0.122226	0.0079528	-0.177159	-0.474692	-0.0775018	-0.11699	-0.362466	-0.00347628	-0.125054	-0.30414	-0.1324	-0.211634	-0.0876309	-0.0102741	0.0232135	-0.350507	0.0809254	0.0432706	-0.20219	-0.280663	0.158467	-0.102203
1369044_a_at	Pde4b	24626	phosphodiesterase 4B, cAMP specific	-1.25125	-0.104461	-0.287235	-0.968553	0.431131	0.575108	-0.53668	0.51725	-0.299848	-0.80458	-0.340677	-0.0577071	0.530913	1.48993	1.16193	0.793329	0.358117	1.13741	0.122488	-0.0731307	0.165028	-0.155207	0.558805	0.331174	-0.0706972	0.640692	-0.0336234	-0.0732235	-0.177573	-0.148521	-0.903259	-0.436524	-0.757651	-0.631491	0.0122152	-0.0817787	0.154807	0.0325891	-0.224754	-0.0632805	0.0510143	0.0253059	-0.153483	-0.312055	-0.107555	0.0660134
1369045_at	Rgs14	114705	regulator of G-protein signaling 14	-0.2207	-0.00364319	-0.083175	-0.0849465	-0.0109083	-0.184077	0.0208921	-0.00160687	0.0257376	-0.0706911	-0.126087	-0.0532567	0.412674	-0.0787546	0.0074273	0.122612	-0.091706	0.193557	-0.175555	0.0441919	-0.291568	-0.0261323	0.0556903	0.0431426	-0.100065	0.0481907	-0.0325005	-0.0375926	0.0412996	-0.0607675	0.0303378	-0.0569014	-0.0433313	-0.0794312	-0.0258609	-0.0422046	-0.100225	0.0445684	-0.035187	0.0799721	0.247998	0.117124	0.0556671	-0.0548534	-0.088394	0.0259756
1369050_at	Pik3c2g	116720	phosphatidylinositol-4-phosphate 3-kinase, catalytic subunit type 2 gamma	-1.01206	-0.045539	-0.0201478	-1.05974	0.1123	-0.0137223	-0.245229	0.0452794	-0.140525	-0.438661	0.0187653	0.0886012	-0.419494	-0.0556143	-0.101712	-0.32963	-0.0144634	-0.142928	0.120378	0.0506635	0.207239	-0.223927	-0.104267	-0.149391	-0.310036	0.0801388	0.16239	-0.150819	0.136493	-0.230079	-0.612027	-0.049218	-0.142185	-0.0246233	0.0324547	-0.0344004	-0.656932	-0.261704	-0.384839	-0.509542	-0.242966	-0.290942	-0.665218	-0.0206864	-0.693376	-0.693976
1369051_at	Insr	24954	insulin receptor	0.424351	0.0146322	0.0758176	0.226798	0.00319769	0.0337322	0.242024	0.0388419	-0.0198593	0.229272	0.0783522	-0.0989653	-0.0759918	0.329278	-0.172815	-0.0837813	-0.0653082	-0.0526073	0.235156	-0.000155016	0.117379	0.266125	-0.162637	-0.0168401	-0.171964	-0.150963	-0.0155109	-0.19621	-0.0536185	-0.0584287	-0.0694073	-0.00820267	0.173629	-0.243797	-0.0387594	-0.0874311	-0.0981947	0.128009	-0.00130341	-0.35122	-0.120007	-0.0869739	-0.0226839	-0.15891	0.0535783	-0.0213856
1369061_at	Gsr	116686	glutathione reductase	0.147944	0.0551163	0.216647	0.0393606	0.0380772	0.163899	0.259737	-0.00593231	0.0823392	0.313786	-0.0446031	0.22833	0.438996	-0.207953	0.0590873	0.579111	0.0225815	-0.0035415	0.307905	-0.0104363	0.236016	0.44704	-0.0404475	-0.072458	0.827447	0.123805	0.658284	1.06249	0.135564	0.485361	0.661292	0.0621049	0.583142	1.16865	0.47793	0.582343	0.468647	0.182547	0.337281	0.388847	0.116444	0.249517	0.121861	0.0963418	0.199605	0.155637
1369063_at	Anp32a	25379	acidic (leucine-rich) nuclear phosphoprotein 32 family, member A	-0.0435755	-0.148555	-0.0580627	0.13424	-0.0426854	0.015004	0.0515731	0.0572625	-0.108711	-0.351818	-0.249335	-0.167371	-0.442431	-0.0616713	-0.0544727	-0.366442	-0.263547	-0.362035	0.165769	-0.0388412	0.218775	-0.340148	-0.102507	-0.0113126	0.189956	0.00984524	0.0926387	-0.0490659	0.0782571	-0.284723	-0.101439	-0.167749	-0.0758969	0.0371741	0.274458	0.220355	-0.368812	-0.0850423	-0.0968822	-0.380845	-0.101067	-0.380683	-0.205087	0.0270915	-0.0127878	-0.166902
1369065_a_at	Atp2a2	29693	ATPase, Ca++ transporting, cardiac muscle, slow twitch 2	-0.256257	-0.217407	-0.0602768	-0.0826285	0.100535	0.0803264	-0.10175	-0.138512	-0.205644	-0.0576301	0.026236	0.0104807	-0.144941	-0.178774	-0.0680395	-0.242367	-0.119728	-0.0532427	0.034341	-0.017968	-0.0223929	0.0358615	0.0953693	0.0504425	-0.0755865	0.0931004	-0.102596	-0.0364094	-0.217435	-0.0257166	-0.100327	-0.0762048	-0.125146	-0.044143	0.051022	-0.0785275	-0.0966232	0.0559148	-0.220766	-0.390453	-0.0373671	-0.108228	-0.325226	-0.126537	-0.252867	-0.251485
1369066_at	Madd	94193	MAP-kinase activating death domain	0.191342	0.0930974	0.291955	0.0746244	0.0212512	-0.11376	0.0153245	0.0285698	-0.062631	-0.0901123	0.0870367	0.00259344	0.201749	0.0828297	0.0670914	-0.074738	-0.0735457	-0.169304	0.156234	0.28632	0.154085	-0.0552991	-0.063021	-0.180987	-0.135626	0.0325604	0.117974	-0.147127	0.0740416	-0.0611839	-0.0925778	-0.0444974	0.065839	-0.144968	0.0101918	-0.0836832	0.0760776	0.206914	0.0557512	0.0826574	0.213142	0.121838	0.350059	0.0868842	0.104048	0.0195319
1369069_at	Akap1	114124	A kinase (PRKA) anchor protein 1	0.315258	-0.113703	0.142625	0.175343	0.132688	-0.00354132	0.319499	-0.126036	-0.110009	0.201171	0.0494018	-0.0405755	-0.202507	0.0926542	-0.0547529	-0.233287	-0.0840812	-0.0610618	0.14144	0.0643565	0.125102	0.120795	-0.24832	-0.316473	-0.250312	-0.298765	-0.252017	-0.0881681	-0.126669	0.07194	-0.0586085	-0.237365	-0.206077	-0.239065	-0.198221	-0.215521	-0.00785216	0.0124866	-0.177322	-0.0511132	0.0626442	0.0195794	0.175571	0.208332	0.226757	0.0716124
1369070_at	Pex12	116718	peroxisomal biogenesis factor 12	0.104065	-0.0723811	-0.153065	0.239565	0.00819431	-0.0691567	-0.0450915	0.0266065	-0.0779511	0.0639977	-0.0310632	-0.0256896	-0.0866264	0.270088	0.0364175	0.011235	-0.0839699	0.00101295	0.333791	0.206242	0.279772	0.349685	0.19939	0.117807	0.268905	0.152602	0.126453	0.213089	-0.0147783	-0.0296128	0.0312422	0.0243473	0.164377	0.0909301	-0.0429295	0.0908663	0.318128	0.051805	-0.0552759	0.0910793	-0.171677	-0.187329	-0.1488	0.0225663	-0.119654	0.0983464
1369072_at	Adh7	171178	alcohol dehydrogenase 7 (class IV), mu or sigma polypeptide	0.845499	-0.281728	0.0851264	0.88273	0.245558	-0.195346	0.53678	0.288186	0.250429	0.71591	0.185142	-0.341013	0.172199	0.335924	0.376819	-0.109582	0.242695	0.158208	-0.198253	0.237352	0.201569	0.375185	0.438653	0.503425	0.411027	0.201334	0.480266	-0.425629	-0.74605	-0.270752	0.326849	-0.435856	-0.208512	-0.136774	-0.06991	-0.383884	0.371764	0.754343	-0.0212466	-0.654428	0.0528986	0.310763	-0.0860803	-0.277511	-0.383598	0.398348
1369073_at	Nr1h4	60351	nuclear receptor subfamily 1, group H, member 4	-0.179098	-0.307565	0.172112	0.0158595	0.163639	0.0509464	0.196874	0.0629979	0.188129	-0.163873	0.0894218	-0.213649	-0.142467	-0.0564296	0.0394018	-0.0453144	0.0479552	-0.195513	-0.0247493	0.052438	-0.0728187	-0.0395199	-0.102662	-0.165864	0.374774	-0.0475725	0.289994	0.115709	0.114797	0.234054	0.126416	-0.00674977	0.0665436	0.457241	0.631092	0.452165	-0.178735	0.0127333	-0.289741	-0.471593	0.0962852	-0.303639	-0.267657	-0.0767023	-0.122056	-0.353589
1369077_at	Asah1	84431	N-acylsphingosine amidohydrolase (acid ceramidase) 1	0.532562	-0.0568525	0.0386727	0.939706	0.0216361	0.107682	0.183379	-0.0426376	-0.0816658	0.0785314	0.101146	0.108532	0.251074	0.156349	0.124395	0.685475	0.161261	0.184336	0.0951284	-0.0217267	0.175369	0.241642	-0.0282997	-0.0101073	-0.00653122	-0.0584198	-0.103181	0.236464	0.043468	0.146163	0.616838	-0.0208871	0.269383	0.332257	-0.0102136	0.0820613	0.671905	0.112206	0.499979	0.721187	0.125659	0.653783	0.27649	-0.195353	0.356124	0.457138
1369079_at	Nxph1	25501	neurexophilin 1	-0.0283296	0.139682	0.124516	0.107397	0.155141	-0.0460171	0.0338451	-0.0154423	0.012794	-0.0595065	-0.0193797	-0.190629	0.321787	0.0513173	0.0968815	0.335208	0.0949276	0.0366747	-0.0307266	0.254009	-0.0519697	-0.092606	-0.0429808	0.194438	0.118397	0.0303467	0.0260572	0.0983232	0.10672	0.0326315	0.01924	0.0302092	-0.00368358	-0.144093	-0.0787666	-0.0715245	0.0846264	0.0528231	-0.0190492	-0.116886	-0.159108	-0.0674156	-0.204845	-0.105318	-0.188412	0.138953
1369081_at	Neu1	24591	neuraminidase 1	0.405235	0.0851755	0.00864768	0.0728228	0.00415448	0.270991	-0.253356	-0.0670688	-0.225917	0.210674	0.130806	-0.238994	-0.170325	-0.22045	-0.0144152	-0.060909	0.061582	-0.109345	-0.160116	-0.150287	0.267431	0.524754	-0.0899903	0.0392272	-0.219419	-0.183106	-0.149958	-0.272726	-0.0760547	-0.0668955	-0.047856	-0.190616	-0.14013	-0.335677	0.123995	-0.0933478	0.0812837	0.0557817	0.0104328	0.351433	-0.275163	0.20406	0.199557	0.175764	0.276529	0.0790226
1369086_a_at	Cacna1d	29716	calcium channel, voltage-dependent, L type, alpha 1D subunit	-0.255283	0.0274486	-0.130061	-0.124018	0.181364	0.348848	-0.393599	-0.0532453	-0.154881	0.0732547	0.545625	0.289491	-0.0657771	0.394292	0.0442571	-0.248592	0.19601	0.170417	0.0762997	0.176956	0.330716	-0.141843	0.350398	0.189737	-0.189357	-0.0422051	-0.13321	-0.239262	-0.0523535	-0.00455359	-0.077967	0.054301	0.0825989	-0.246645	-0.31898	-0.17305	0.0562678	0.0659052	0.0778919	-0.209342	-0.0153076	-0.12823	-0.113127	0.204156	-0.139235	-0.189142
1369087_at	Flt1	54251	FMS-related tyrosine kinase 1	0.0842971	-0.42823	-0.0671668	-0.0109138	-0.0237241	0.00280186	0.0254157	-0.0533374	0.11106	0.197399	0.252244	0.159774	-0.307111	0.168631	-0.289809	0.321878	-0.00187727	0.236572	0.165497	-0.100598	0.143526	0.217669	-0.13176	0.0778354	-0.0805027	0.0131387	-0.0693708	-0.076671	-0.0671619	-0.191445	-0.283003	-0.189524	-0.309519	-0.174599	-0.113624	-0.0409781	-0.0785025	0.0711749	-0.16109	-0.148613	0.0436752	-0.181381	-0.218122	-0.0372959	-0.0667175	-0.150806
1369088_at	Erbb3	29496	erb-b2 receptor tyrosine kinase 3	0.0656051	-0.218943	-0.112952	0.126225	0.0645405	-0.131305	0.235172	0.207971	-0.124987	0.190911	0.0905417	0.166541	-0.126693	0.29223	-0.0907283	0.0456353	-0.078995	-0.0598637	-0.263875	-0.138479	0.119547	-0.00371014	-0.0700978	0.0376554	-0.0460053	0.107037	0.137084	-0.113364	0.136874	0.073149	-0.289243	-0.00185816	0.00654377	0.0191434	-0.0683684	-0.0176333	-0.163391	-0.034901	-0.0473382	-0.0585262	-0.158489	0.124384	-0.0446532	-0.0333277	0.0269582	0.00735593
1369089_at	Prkcg	24681	protein kinase C, gamma	-0.142057	0.0779155	0.0450202	-0.283167	-0.27462	-0.32922	-0.0260861	0.095617	0.0962516	0.108456	0.00470181	0.0941249	0.149869	0.0121083	0.304382	0.0931626	-0.00187812	0.075614	-0.156191	-0.104144	-0.416598	-0.0599678	0.0041542	-0.111481	-0.150549	0.180413	-0.0388645	-0.0620248	0.102379	0.000246381	-0.20256	-0.049663	0.0732622	-0.104935	0.118984	0.0320259	-0.213371	0.0220022	-0.0141275	-0.104559	-0.160405	0.0102769	0.0612962	0.348751	0.0741769	-0.461086
1369092_at	Sec22a	117513	SEC22 homolog A, vesicle trafficking protein	-0.573056	-0.120542	-0.237178	-0.198984	0.105264	0.0854374	-0.0966833	-0.0406822	-0.0350301	0.0180834	-0.0193855	0.0969436	-0.0249866	0.428286	0.24757	-0.133462	0.209393	-0.0114977	-0.093424	-0.124823	0.116042	-0.385609	0.0715496	-0.0504159	-0.0753032	0.138881	0.0609244	-0.414843	-0.170423	-0.25715	-0.153605	0.11593	0.124976	-0.329247	-0.151014	-0.122618	-0.375968	-0.314904	-0.311327	-0.300552	-0.0593588	-0.235218	-0.222619	-0.0506758	-0.0996846	-0.255348
1369097_s_at	Gucy1b3	25202	guanylate cyclase 1, soluble, beta 3	-0.219801	0.0282545	0.0773444	-0.00389031	0.142947	0.418912	0.112527	0.174577	0.021705	-0.0548726	0.0852894	-0.0655712	-0.739284	0.360642	-0.0931396	-0.029628	0.159904	0.286537	0.240656	0.135595	0.391018	-0.0725259	-0.130696	0.0743969	-0.233393	-0.024785	0.0820301	-0.187854	-0.197293	-0.456329	-0.105008	-0.250347	-0.363809	-0.238646	0.0954621	-0.0425529	0.0033691	-0.192483	-0.0326631	0.169039	-0.0560412	0.160914	-0.214612	-0.177585	-0.101747	0.0564916
1369099_at	Slc30a1	58976	solute carrier family 30 (zinc transporter), member 1	0.194472	-0.292883	-0.0509884	0.245376	0.168931	0.176876	-0.117636	-0.0325311	-0.0838549	0.221122	0.249384	-0.0132297	-0.629852	0.541584	-0.374497	-0.277601	0.0724012	0.0574979	0.642523	-0.116822	0.642718	0.70368	-0.11016	-0.157679	-0.473514	-0.301967	-0.235321	-0.0987921	-0.0705114	-0.0345069	-0.15708	-0.196212	-0.0258308	-0.089176	0.13722	0.165666	0.224479	0.143959	0.308913	0.0290769	0.160493	0.0809022	0.285518	0.0149951	0.476481	0.372827
1369101_at	Rxra	25271	retinoid X receptor alpha	0.316087	-0.0342042	0.0527942	0.125292	-0.0550793	-0.131011	0.231556	0.105628	0.0414772	0.0521333	0.115702	0.106314	-0.247055	0.0748117	-0.0475392	-0.214584	-0.0902461	-0.180283	0.0177954	-0.0947018	0.0114811	0.124327	0.150805	0.0111853	-0.122852	-0.0816741	-0.0557309	-0.157867	-0.114316	-0.11379	-0.250519	-0.0933598	-0.0527877	-0.142603	0.106782	0.193658	-0.232034	-0.0651057	-0.268565	-0.496044	-0.13938	-0.226536	-0.0344064	0.124787	0.00545855	-0.162401
1369103_at	Fyn	25150	FYN proto-oncogene, Src family tyrosine kinase	-0.123013	-0.0773212	-0.0814288	-0.232569	-0.233865	-0.0914963	0.0938516	0.176275	0.00909984	0.0211859	-0.0471952	0.248046	-0.0976177	0.234648	0.144007	-0.246743	0.114722	-0.172508	0.0366295	-0.111426	0.0801236	-0.534392	-0.0794799	-0.270808	0.0313986	0.0889698	-0.0698825	-0.0811597	-0.070089	0.0173592	0.159979	-0.0690389	-0.214745	0.00327198	-0.0722529	-0.0841557	0.295639	0.0900001	0.453997	0.165813	-0.191139	0.0862059	0.21408	-0.203638	0.45636	0.545099
1369104_at	Prkaa1	65248	protein kinase, AMP-activated, alpha 1 catalytic subunit	-0.250137	-0.146248	-0.0362281	0.316373	0.0768518	0.11582	0.0417699	0.129498	0.101258	-0.197115	0.0825353	-0.085371	0.00374704	0.540102	0.184906	-0.108265	-0.0855982	-0.0280536	0.0933649	-0.0311339	0.0820821	-0.377648	-0.419969	-0.276924	0.0566799	-0.218906	-0.101209	0.152584	-0.132	0.111233	0.541829	-0.0767891	0.256183	-0.00391106	0.128559	0.206535	0.131998	-0.231126	0.00852937	0.441138	-0.18381	0.240291	0.0933316	-0.149562	-0.0265817	-0.143349
1369105_a_at	Pkib	24678	protein kinase (cAMP-dependent, catalytic) inhibitor beta	0.124015	0.899684	1.18316	-0.0799137	0.564579	0.163143	0.0846754	-0.0172647	0.247538	0.148315	-0.223707	-0.0475132	-0.440595	0.749033	-0.0029379	-0.315578	-0.326021	-0.0324829	0.41719	0.141473	0.480637	-0.288643	0.254884	-0.0742974	0.342798	0.774938	0.548815	-0.665642	0.155329	-0.410227	-0.353881	-0.253818	-0.742119	-0.826215	-0.530607	-0.607368	1.95401	0.166536	1.04706	3.19423	0.48836	1.04236	-0.105967	-0.587853	-0.44079	0.335977
1369120_a_at	Lhb	25329	luteinizing hormone beta polypeptide	-0.281498	-0.00263941	-0.101145	-0.249588	-0.112873	-0.173911	-0.00221008	0.113134	0.133185	-0.113321	-0.0679572	-0.110899	0.153708	-0.10788	-0.0531768	-0.226039	-0.356376	-0.0529359	-0.156201	-0.0588465	-0.191576	-0.131335	0.0833866	0.0214459	0.0387927	-0.00182297	-0.115436	0.125845	0.0893375	-0.000683588	-0.0632967	0.136941	-0.0528005	-0.0745305	0.0626401	0.0381252	-0.249293	-0.0610504	-0.138429	-0.283839	0.0147256	-0.246269	-0.278157	-0.0955605	-0.510466	-0.234646
1369121_at	Gdf9	59304	growth differentiation factor 9	-0.167562	0.0243397	0.0870183	-0.00962698	0.0545822	-0.0530486	0.176318	0.0825633	0.138176	-0.161893	-0.0706127	-0.370889	-0.00252894	-0.235965	-0.0506253	-0.0805121	-0.408464	-0.0602484	-0.146996	-0.115699	-0.0573303	-0.214832	-0.192493	-0.218583	0.0190449	0.0493036	0.177514	0.143626	0.113523	0.150831	0.175615	0.259562	0.190015	-0.11198	0.0103488	-0.0924378	-0.0553277	0.244349	0.274963	-0.217024	0.145607	-0.0130221	0.0393712	0.227543	-0.19292	0.0377963
1369124_at	Htr2a	29595	5-hydroxytryptamine (serotonin) receptor 2A, G protein-coupled	-0.138008	-0.0183692	-0.0588198	-0.190329	-0.0697549	-0.0635872	-0.104239	-0.0191842	-0.116847	0.0987927	-0.0353823	0.0786677	0.132374	0.0490272	0.118814	-0.0042013	-0.0663645	0.00945963	0.0641951	0.172326	-0.220262	0.0998024	0.0995825	0.0561475	0.0504964	-0.047588	-0.011936	0.155172	0.23077	-0.0265871	-0.0159047	-0.0898154	0.0393187	0.0227127	0.100953	0.132383	0.0334379	0.0609045	0.0933995	-0.333733	-0.271841	-0.180089	-0.0595803	0.00619385	-0.170336	0.0419729
1369132_at	Slc18a2	25549	solute carrier family 18 (vesicular monoamine transporter), member 2	-0.207228	0.00564195	0.0139971	-0.263444	0.0217738	-0.223248	-0.0472819	-0.107904	-0.0458382	-0.197589	-0.111919	-0.104463	0.162421	-0.211043	-0.172426	0.154144	0.0652332	0.0255903	0.00301583	-0.148383	-0.261707	-0.0730252	0.00839852	0.00531792	-0.0931389	-0.118858	0.000253118	-0.0627905	0.0718999	-0.191552	-0.232505	0.0426528	0.0861197	-0.392749	-0.182002	-0.228438	-0.0252132	0.062531	-0.0688285	-0.197591	-0.141793	-0.155591	-0.129336	-0.0398951	-0.15541	0.039091
1369135_at	Syt11	60568	synaptotagmin XI	-0.199478	0.194051	-0.0364516	-0.295968	-0.0585178	-0.210388	-0.137574	0.0938577	0.025476	-0.0653425	-0.0543859	0.0553049	-0.0477156	-0.357211	-0.125364	0.181246	-0.0307854	0.256886	-0.16864	-0.137949	-0.356345	0.115137	0.0182307	-0.0101268	0.0664485	0.00433735	0.0663224	-0.252281	-0.0395711	0.0618112	-0.139684	0.145986	-0.0756058	-0.148021	0.130293	-0.0370143	-0.245512	-0.0844524	-0.0146562	-0.201914	0.0188344	-0.168645	-0.128418	0.103237	-0.197966	0.0674444
1369136_at	Cyp2a3	24299	cytochrome P450, family 2, subfamily a, polypeptide 3	-0.0896459	0.0644029	0.0256847	-0.132231	0.172342	-0.0853829	0.187967	0.053433	0.0985315	-0.0014757	0.133448	0.0301275	0.141588	-0.0961553	-0.216033	0.473448	0.182595	0.447334	-0.127018	-0.057888	-0.0727683	-0.155501	-0.102289	0.00166406	0.1432	0.0558806	-0.00856333	0.049152	0.00940914	-0.00273213	-0.0836558	0.119069	0.020857	0.0107175	0.16849	0.0860673	-0.267736	0.0560711	-0.162356	-0.293168	0.0918756	-0.0848017	0.000634081	0.317997	-0.0437214	-0.0994211
1369146_a_at	Ahr	25690	aryl hydrocarbon receptor	1.39492	-0.264469	-0.202018	1.01203	-0.326472	0.141905	0.273475	-0.0988602	-0.246702	0.48682	-0.266752	-0.0796087	1.11693	0.965929	0.123881	1.00597	-0.185261	0.440042	0.770301	0.0229267	0.778131	1.14922	0.315337	0.121956	0.35414	0.234244	-0.132491	0.573958	0.213826	0.129788	-0.357357	-0.647143	-0.283284	-0.398149	0.0845959	-0.10686	-0.431638	-0.158117	-0.458871	0.0417562	-0.593669	-0.0720296	-0.302264	-0.215773	-0.163264	0.425162
1369152_at	Ppp3r1	29748	protein phosphatase 3, regulatory subunit B, alpha	0.275365	0.00197344	0.0500801	0.61624	0.156982	0.197999	-0.237885	-0.145841	-0.0842423	0.0908949	-0.0762336	0.0170396	-0.355143	0.61844	-0.28085	-0.030191	0.129563	0.127912	0.456853	-0.188234	0.45569	0.0619646	-0.108242	-0.100094	-0.290219	-0.537971	-0.259488	0.16747	-0.0393521	0.0864512	-0.0713872	-0.217756	-0.193257	-0.118448	-0.187767	-0.178398	0.0950216	-0.111113	0.0640765	0.0365445	-0.0529084	-0.000911817	0.194709	-0.131334	0.356857	-0.0214899
1369155_at	Cntn4	116658	contactin 4	-0.121387	-0.0516806	-0.0072016	-0.149961	-0.24958	-0.00123986	-0.0498811	-0.0973236	-0.199546	-0.135858	-0.169403	0.0186639	-0.117319	-0.169508	-0.114398	-0.18136	-0.210592	-0.0684911	0.016036	0.0807873	-0.133569	-0.0462189	0.0132039	0.0950465	-0.098195	-0.0100877	-0.0190363	-0.0963806	-0.103444	-0.05599	-0.0397008	0.00312722	0.0291762	-0.175744	-0.0207887	-0.116165	-0.207834	0.0063367	-0.146632	-0.226228	-0.184924	0.00488455	-0.0642286	0.174854	-0.205455	0.206949
1369156_at	Frk	79209	fyn-related Src family tyrosine kinase	-0.259529	-0.210383	-0.198676	0.133862	0.186195	0.358265	0.0635455	-0.10557	-0.233024	-0.0518319	-0.0668488	0.108377	-0.109422	0.323759	0.0256804	0.497471	0.229359	0.204057	0.518946	0.0971971	0.360952	0.328877	0.0369327	-0.0373226	-0.329651	-0.072189	-0.278511	-0.123314	-0.0850161	-0.213885	-0.292484	-0.0642432	0.0374732	-0.165685	-0.122277	0.0743618	-0.0490486	-0.0210643	0.00476262	0.225442	0.157704	0.221895	0.267062	0.132924	0.388474	0.0142963
1369157_at	Pde3b	29516	phosphodiesterase 3B, cGMP-inhibited	0.0418406	0.0308234	0.0072269	0.318168	0.0199033	0.233542	0.17653	0.0122137	0.0839807	0.207787	0.151797	0.148086	-0.0947519	0.244387	-0.109564	0.308454	0.348499	0.091232	0.43425	0.0210921	0.325631	0.310854	-0.0195443	0.0293443	-0.173177	-0.121433	-0.00617864	-0.0958051	-0.0991074	-0.15061	-0.0249743	0.0485038	-0.0302569	-0.0225978	-0.206456	-0.0708578	-0.128743	0.109901	0.00272396	-0.238403	-0.0657316	-0.194653	-0.0322636	0.176324	-0.0337317	0.0557582
1369159_at	Ar	24208	androgen receptor	-0.216887	-0.00861733	-0.142934	-0.30019	0.113289	-0.0018604	-0.173973	0.0307468	0.113647	-0.172558	-0.0392318	-0.0456127	0.0870947	-0.184902	6.06829e-05	-0.172401	-0.242903	-0.154	-0.136638	-0.0411389	-0.268758	0.0100106	0.107594	0.183985	0.053853	-0.0367082	-0.0884014	0.0480408	0.163412	-0.116471	0.0704907	0.157109	0.19355	-0.0725038	0.070856	-0.0119967	-0.17964	-0.0209402	-0.0307305	0.157883	0.0779705	0.0808253	-0.112542	-0.0642489	-0.265105	0.115839
1369161_at	Abcb4	24891	ATP-binding cassette, subfamily B (MDR/TAP), member 4	0.885628	-0.187083	-0.0598711	0.737516	0.151915	0.102827	0.531755	0.0827083	0.03922	0.656374	-0.0303502	-0.188347	0.287645	0.045823	-0.169687	0.359248	-0.0673347	0.164455	-0.0941824	0.232172	0.349804	0.343757	0.27746	-0.0299419	-0.408615	0.0205615	-0.302322	-0.479252	-0.00496183	-0.0756529	-0.095012	0.0421885	-0.0143047	-0.553403	-0.23504	-0.510381	-0.0141955	-0.131602	0.0690229	0.126991	-0.126722	0.108034	-0.487083	-0.51459	-0.118092	0.247102
1369162_at	Gucy2c	25711	guanylate cyclase 2C	-0.121194	0.216286	0.181416	-0.123371	0.0272083	0.0599267	0.00502435	0.0939537	-0.0211666	0.0835979	-0.0912299	-0.0159325	0.284622	0.09	-0.123733	0.104729	-0.00838572	0.135795	-0.077848	-0.0559008	-0.405378	0.0679009	0.0746426	0.180671	0.0781881	0.0394501	0.0237265	-0.0637613	-0.0495721	-0.0721168	0.272176	0.169017	0.101364	-0.121659	-0.0979562	0.0625294	0.936719	0.0538748	0.0324262	1.45601	0.128692	0.305794	0.542618	-0.0198522	0.204318	0.435877
1369167_at	Gfra2	25136	GDNF family receptor alpha 2	-0.0191119	-0.0607823	-0.0366996	-0.0132469	0.0260315	-0.078626	-0.103327	0.109935	0.0894986	0.194194	0.307646	0.121999	0.344383	-0.0969376	0.0540651	0.0147603	-0.164402	-0.12068	-0.386123	-0.116757	-0.638691	0.0693066	0.039994	0.120046	-0.13685	-0.188158	-0.155815	-0.154262	-0.189394	-0.0891336	0.132779	0.258439	0.137731	-0.0161529	0.059724	0.179147	-0.0522496	0.0487939	-0.15747	-0.186227	0.108213	-0.253014	-0.146412	0.0347999	-0.239323	-0.127875
1369169_at	Slc23a1	50621	solute carrier family 23 (ascorbic acid transporter), member 1	-0.417686	0.0853846	0.0414224	-0.436398	0.0972281	0.0196141	0.0327071	0.220519	0.299115	-0.207423	0.0490793	0.113648	0.0729442	0.224159	0.054404	-0.0107599	0.0791049	0.0938373	0.377139	0.159249	0.355554	0.0513445	0.161882	0.0628175	0.23019	0.487952	0.398467	-0.039773	0.113549	0.0376347	-0.241033	-0.261649	-0.0527786	0.0492748	-0.0255897	-0.0323138	-0.184504	-0.095144	-0.266969	-0.492227	-0.151709	-0.29955	-0.496209	-0.0315854	-0.332194	-0.219348
1369174_at	Smad1	25671	SMAD family member 1	0.00242847	-0.080373	-0.00953639	-0.105885	0.0917763	0.154464	0.086506	0.0149145	0.00959835	0.0576484	0.261462	0.144304	-0.474076	0.142074	-0.335243	-0.110622	0.210355	0.02072	0.231005	0.00170513	0.325503	-0.137988	-0.187891	-0.332164	-0.391766	-0.275302	-0.148543	-0.0159326	-0.00374355	-0.0307754	0.00629642	0.0163569	0.0184845	-0.0400139	-0.170931	-0.144127	0.0396134	-0.0685733	0.185845	-0.218378	0.0436124	0.0530881	-0.119155	0.213355	0.109845	-0.177141
1369177_at	Pi4k2a	114554	phosphatidylinositol 4-kinase type 2 alpha	-0.158773	0.0997332	0.0899194	-0.171452	0.16874	0.0451181	-0.00485826	0.251582	0.233257	-0.240524	-0.0428033	-0.0312195	-0.215806	0.266898	0.0585568	-0.0631347	0.208703	-0.135956	0.258844	0.24569	0.252551	-0.0400568	0.0606086	-0.0899941	0.0230791	-0.154454	-0.0656223	0.140981	0.0267892	0.0328147	-0.133652	-0.128723	-0.114072	-0.0973713	0.114554	0.040981	-0.0493563	-0.229636	-0.0856051	-0.199593	-0.213164	-0.175629	-0.0789875	0.073604	-0.025026	-0.166425
1369179_a_at	Pparg	25664	peroxisome proliferator-activated receptor gamma	-0.0501592	0.290204	0.446725	-0.210289	0.38766	-0.00593188	0.118943	0.0715178	0.0448938	0.235509	0.215333	0.0259253	0.0450415	-0.41885	-0.313388	0.0251858	0.254293	-0.307622	0.00141436	0.0489247	0.164322	0.0625415	-0.114044	-0.0235034	-0.0530577	0.0736419	0.0961892	-0.41113	-0.111645	-0.290735	0.0325507	-0.0909705	-0.026963	0.0316165	-0.0276828	0.164366	-0.28376	-0.0948145	0.0598561	-0.262359	0.128468	0.146465	0.0733745	0.0470741	0.0344854	-0.170138
1369186_at	Casp1	25166	caspase 1	-0.103662	0.10166	0.0348232	0.107825	-0.179065	0.00543042	0.20226	0.0169097	-0.13798	0.0730828	0.102284	0.112427	0.00866955	0.220592	0.13505	-0.173178	0.0489928	0.0144028	-0.0983885	-0.0414601	-0.0156632	-0.280701	0.00315039	0.122974	0.0280278	-0.00999124	-0.0624722	0.0295992	-0.125058	-0.0574423	0.109765	-0.20909	-0.216122	-0.0992219	-0.140285	-0.214345	0.104832	-0.017711	0.290688	0.471442	0.101185	0.377102	0.623828	-0.189346	1.03932	0.304683
1369189_at	Npy4r	29471	neuropeptide Y receptor Y4	-0.145017	0.172832	0.145645	0.0936758	0.19614	0.0138937	-0.102237	-0.0106772	-0.14241	-0.25945	-0.127004	-0.256908	0.25835	-0.0564892	-0.0181865	0.0423588	-0.302151	0.001787	-0.247842	-0.157327	-0.245993	0.00902875	0.0643081	0.184892	0.00668849	0.00539878	0.0737893	-0.0160784	0.00219716	0.0187915	0.00232257	-0.0474847	-0.0117939	-0.166808	-0.146952	0.000588335	-0.0987983	0.118993	-0.108292	0.241753	0.155727	0.053939	-0.0628158	0.00296551	-0.261186	-0.106306
1369195_at	Fabp2	25598	fatty acid binding protein 2, intestinal	-0.156062	0.025241	-0.312704	0.1286	-0.0113663	0.220193	-0.100031	-0.104288	0.0507463	-0.1961	0.111974	0.335007	-0.437601	0.528836	0.0646146	-0.0195484	0.269742	0.196521	-0.234461	0.0290308	0.0713727	-0.644701	-0.0922795	-0.408409	-0.0703238	0.27204	-0.00203765	-0.311196	0.303131	-0.106858	0.933532	0.130756	0.557831	-0.0186144	-0.0446956	-0.187888	0.909524	-0.229234	0.302854	0.611957	-0.433582	0.11103	0.0563144	0.0640963	0.0545518	0.627061
1369198_at	Apaf1	78963	apoptotic peptidase activating factor 1	-0.0982991	-0.0734048	0.00864138	-0.0315731	-0.0216182	-0.127054	-0.146199	0.244918	0.0748059	-0.0859394	0.118118	-0.048399	0.0580084	-0.00288802	-0.115259	0.246111	0.150212	0.209284	-0.294475	-0.0912971	-0.368273	0.0596156	0.130759	0.0894826	0.147421	0.0355973	0.00653197	0.062878	-0.0593572	0.0226843	-0.190121	0.0510817	-0.0871108	-0.0126316	0.0249962	-0.096751	-0.102201	-0.0784139	-0.0587405	0.053895	-0.0597501	0.0820227	0.188885	0.370022	0.0709262	0.214326
1369200_at	Nt5e	58813	5' nucleotidase, ecto	-0.834034	-0.0226693	-0.225882	-0.804308	-0.0412189	-0.0220865	-0.341317	-0.0728977	-0.236917	-0.429336	0.164581	0.0891592	-0.615265	0.161805	-0.348389	-0.266684	-0.0422104	-0.207508	-0.137459	-0.187181	0.020441	0.115782	0.00431492	-0.0305659	-0.483209	0.215108	-0.141636	-0.385974	0.0304121	-0.0845422	-0.624872	-0.24933	-0.402678	-0.415295	-0.189881	-0.273112	-0.330344	-0.235193	-0.460804	-0.0492975	0.190764	0.011271	-0.0957205	-0.0996585	-0.0409326	0.0502542
1369204_at	Hck	25734	hemopoietic cell kinase	-0.164442	0.115418	-0.0664082	0.194489	-0.270558	0.111061	0.271343	0.0198246	-0.205024	-0.432158	-0.335095	-0.131549	-0.0317119	0.321556	0.473061	-0.580826	-0.0797196	-0.0134712	-0.2606	-0.0240586	-0.137623	-0.286284	-0.0216673	-0.0922095	0.0402742	0.0373895	-0.145174	-0.117659	-0.0712292	-0.0156525	0.246984	0.0236096	-0.0182983	-0.0734698	-0.176489	-0.215595	0.414701	0.133346	0.440413	0.304763	0.233357	0.524256	1.01975	-0.2699	1.36712	0.697191
1369208_at	Il7	25647	interleukin 7	-0.228799	0.237019	0.0450699	-0.762731	-0.417568	-0.0373788	-0.137438	0.0830936	-0.328306	0.0312057	-0.131783	0.291717	0.17826	0.112562	0.187407	-0.00278602	0.145343	0.561719	-0.0925952	0.10518	-0.0391256	0.443365	-0.173037	0.174055	-0.920197	-0.859203	-0.651602	-0.122691	0.551474	-0.104806	-0.159748	-0.14085	-0.0762685	-0.0299426	-0.0937407	0.202244	-0.0952176	-0.00560599	0.240515	0.095432	0.0457065	-0.231289	0.268535	0.326169	0.294386	0.0509617
1369214_a_at	Ciita	85483	class II, major histocompatibility complex, transactivator	-0.0823226	-0.0675405	-0.0298665	-0.282216	-0.0446281	-0.0550221	0.109239	0.0311516	-0.00672155	-0.111773	-0.148462	-0.0637023	0.187789	0.0998324	0.147918	0.0485409	0.104672	0.191409	-0.233194	-0.229134	-0.300574	0.0800982	0.087679	0.170175	-0.0403169	0.0429023	-0.237785	0.125465	0.216006	0.101707	0.0074408	0.0613608	-0.12415	-0.134179	-0.0782498	0.0351043	0.146226	0.12086	-0.0390644	3.34501e-05	0.0761375	0.100746	0.326975	0.131704	0.397745	0.116904
1369215_a_at	Cpd	25306	carboxypeptidase D	-0.0765486	0.0169608	0.0643946	-0.183427	0.032398	-0.0687966	0.000335633	0.109918	0.0455993	-0.112052	0.0832221	0.0486714	-0.404056	-0.0242235	-0.232729	-0.19385	-0.134589	-0.129191	0.173758	0.0112088	0.304834	0.153351	-0.223362	-0.167109	-0.299216	0.121038	-0.150548	-0.399238	0.034943	-0.0817454	-0.166256	-0.02414	-0.196814	-0.158092	-0.358393	-0.150311	-0.305679	-0.100192	-0.209623	-0.248526	-0.0946319	-0.168401	-0.0720838	0.127305	-0.0935637	-0.0435003
1369218_at	Met	24553	MET proto-oncogene, receptor tyrosine kinase	0.612205	-0.125093	-0.0336009	0.730492	0.184787	0.25631	0.260041	-0.160294	-0.0577821	0.409421	-0.0537998	0.0966109	-0.211149	0.680062	-0.0693274	0.00182613	-0.0225302	-0.0314995	0.492881	0.0543523	0.416206	0.365705	0.0414397	0.129413	-0.248984	-0.0774632	0.0999199	-0.0796872	0.10019	-0.00607591	-0.136181	-0.011373	0.0772906	-0.224181	-0.0802835	-0.158651	-0.133397	0.0709647	0.0152875	-0.391165	-0.0743872	-0.275868	-0.16609	0.166712	0.0148464	-0.0744768
1369221_at	Ppp2r2a	117104	protein phosphatase 2, regulatory subunit B, alpha	0.113243	0.173664	0.114163	-0.703715	-0.104264	0.21338	-0.272821	-0.244267	-0.202436	-0.130107	-0.281812	-0.197268	-0.444888	0.0390807	0.0354597	0.0802052	-0.0317884	-0.172063	0.0239499	0.0614664	0.144458	0.463601	0.226829	-0.16532	-0.20341	0.0454428	-0.133626	0.236606	0.162988	0.11429	0.122831	-0.0129673	0.0354713	-0.269293	-0.199654	-0.158105	-0.695354	-0.0329193	-0.119978	-0.360451	-0.18199	-0.217	-0.442823	0.162021	-0.398781	-0.671664
1369224_at	Cdh17	117048	cadherin 17	-2.55442	1.43772	0.194754	-4.68669	-0.123445	-0.416524	-1.17669	-1.20439	-0.692315	-1.75183	0.770138	0.939394	-2.80404	-0.873289	0.113956	0.215132	0.461928	-0.315175	-0.165353	-0.21116	1.00444	-1.69505	-1.65176	-3.11986	-2.58161	-1.24164	-0.940444	-1.26181	-0.151382	0.330469	-0.757004	-1.02901	-0.981587	0.843384	1.58459	-0.790117	-0.264241	-0.992233	-0.641613	1.9076	1.95877	2.10747	0.924894	-0.0728841	-0.835666	1.71007
1369226_at	Kng2	25087	kininogen 2	-0.703658	-0.380004	-0.36902	0.037257	0.104731	0.176328	0.287672	0.442032	0.247326	-0.215322	-0.0399992	0.145966	-0.223189	0.300119	0.110617	-0.149867	-0.104301	-0.106285	-0.0157951	-0.109589	0.25546	0.413316	0.0780441	0.366423	0.0290301	-0.0944442	-0.0338188	0.124407	0.205821	-0.0451565	-0.0883853	-0.145409	0.0785743	0.195008	0.140009	0.0908576	-0.390763	0.138996	-0.179926	-0.417585	0.033929	-0.3287	-0.395942	-0.0924984	0.173719	-0.239367
1369227_at	Chm	24942	choroideremia (Rab escort protein 1)	0.221602	0.0179252	0.184006	0.150783	0.164755	-0.0721129	0.090662	-0.117042	-0.0272448	0.218359	0.28851	0.275861	-0.464612	0.67166	-0.441204	-0.304702	-0.0245898	0.104608	0.317723	0.0647946	0.505166	-0.00445363	-0.0401835	0.0532811	0.0785637	0.0335234	0.00687201	0.0203095	-0.197111	0.0679098	-0.190745	-0.235871	-0.0557515	0.156972	-0.0728489	-0.00362148	0.0587544	-0.234597	-0.148481	0.154542	-0.015236	0.0551726	0.162006	-0.0369509	0.314877	-0.0458231
1369228_at	Lifr	81680	leukemia inhibitory factor receptor alpha	0.169051	-0.0183087	-0.144783	0.299297	-0.023392	-0.153649	0.0593149	0.0808206	-0.0104399	-0.0257912	-0.160451	0.205257	0.315044	-0.200439	0.027335	0.137962	-0.0674846	0.0753651	-0.153372	0.00513919	-0.270262	-0.22933	0.0178928	0.140508	-0.00844825	-0.0619728	-0.057088	-0.111714	-0.0207758	-0.0291251	0.0547377	0.194267	0.0807052	0.0379867	0.11692	0.119247	-0.105968	0.0955895	-0.138021	-0.121618	0.0623905	-0.149823	-0.0846981	0.108348	-0.148157	0.304988
1369229_at	Pde5a	171115	phosphodiesterase 5A, cGMP-specific	-0.0796021	-0.191815	-0.158634	0.237113	0.0591513	0.267493	-0.154111	-0.0983086	-0.132377	0.115417	-0.0751201	-0.000438982	0.345296	-0.0106106	0.0645041	0.147479	-0.140014	0.00856495	-0.118169	-0.0366459	-0.0432348	0.276291	-0.00118442	0.0854932	0.177865	-0.0145832	0.0105579	0.0265484	-0.200223	0.106716	0.138356	0.0919369	0.127745	-0.0398073	-0.0925544	-0.0621617	-0.0386269	0.0227684	-0.184016	-0.105247	0.0855251	0.00278999	0.0733476	-0.0530195	-0.018952	0.204947
1369234_at	Slc20a2	29502	solute carrier family 20 (phosphate transporter), member 2	-0.353947	-0.130504	-0.176567	-0.284964	-0.0261371	0.0489852	-0.0700581	0.0369438	-0.0275503	0.0615613	0.247592	0.0890713	-0.503241	0.308623	-0.0874874	-0.301557	-0.0823494	0.112767	-0.045167	-0.103475	0.0246775	-0.356819	-0.0189488	0.00592276	-0.11376	0.0847551	0.0206689	-0.159182	-0.119385	-0.0962232	-0.355444	-0.135356	-0.167165	-0.128008	-0.0182386	0.129081	-0.342641	-0.0543627	-0.246389	-0.601287	-0.188458	-0.242834	-0.293544	-0.0610991	-0.0845711	-0.114585
1369238_at	Inhbe	83711	inhibin beta E	-2.01109	0.149822	0.0389444	-1.50004	0.18947	0.172099	-0.702199	-0.0764157	-0.0918237	-0.50669	0.615044	0.0866571	-0.3585	0.33707	0.159125	-0.580934	0.117619	-0.231149	0.0298431	0.184161	0.00555651	-0.23089	-0.0441355	-0.0276652	-0.701842	-0.32204	-0.617853	-0.423406	-0.191864	-0.166229	-0.367275	-0.034606	-0.183515	-0.123154	0.0909488	0.348173	-1.0385	-0.0290909	-0.511826	-1.36116	-0.267404	-0.812909	-0.624673	-0.19881	-0.72313	-1.01837
1369244_at	Arnt	25242	aryl hydrocarbon receptor nuclear translocator	0.0636287	0.00777513	0.0124541	-0.00263334	-0.0467299	-0.0344525	0.0479517	0.0652694	0.121948	0.024785	0.184595	0.14845	-0.448118	0.541789	-0.181286	-0.263836	-0.335219	-0.262527	0.169124	-0.0557375	0.166088	-0.198178	0.0177454	-0.0551531	-0.129492	-0.029595	0.101513	0.219718	-0.0310977	0.161646	-0.0319707	0.135989	0.273269	0.0450122	0.134165	0.217098	0.00795664	0.0840542	-0.119546	-0.241611	-0.259177	-0.20233	0.136644	0.234617	0.156422	-0.163759
1369245_at	Chrm2	81645	cholinergic receptor, muscarinic 2	-0.203141	-0.0623273	-0.0524565	-0.0262537	-0.027951	0.00747976	-0.140793	-0.0841298	-0.107978	-0.153422	-0.118404	0.00970134	0.141749	-0.136298	0.0200633	0.145203	-0.0130351	0.0985996	0.0896662	0.156609	-0.0400021	0.0127813	0.0591108	0.0403824	-0.0758258	-0.0928921	-0.0321712	-0.0167087	0.0621376	-0.0102488	-0.104313	-0.0893857	-0.0183274	-0.032238	-0.113354	-0.0292184	-0.0419827	0.0326818	-0.0474488	-0.00323845	-0.0733618	-0.0151324	0.152313	0.195784	0.143684	-0.0981108
1369248_a_at	Xiap	63879	X-linked inhibitor of apoptosis	-0.798635	0.373446	-0.020648	-0.602316	-0.0567919	-0.0117134	-0.0266209	0.471025	0.29617	-0.382071	0.101459	-0.0846341	-0.876601	1.18632	-0.22035	-0.730318	-0.31596	-0.37367	0.0405032	0.146817	0.489144	-0.745028	-0.172036	0.0632573	-0.328564	-0.0287844	-0.0846631	-0.388425	-0.38562	-0.20102	-0.0987849	-0.478473	-0.417366	-0.393344	-0.174845	-0.414574	-0.00577554	-0.214468	-0.142277	-0.125439	-0.277712	-0.406304	-0.00111688	-0.241119	0.0107163	-0.302807
1369249_at	Ankh	114506	ANKH inorganic pyrophosphate transport regulator	-1.01052	-0.073578	0.162233	-0.608666	-0.0958405	-0.0269934	-0.106097	-0.15945	0.156891	-0.173434	0.0392905	0.0948363	-0.434606	0.188365	-0.255315	-0.395091	-0.233234	-0.0800283	-0.129792	-0.0240568	0.191405	-0.880147	0.0218698	-0.106363	-0.077097	0.0594894	-0.191086	-0.07653	-0.17667	0.00305034	0.233349	0.0845016	0.234912	0.124723	-0.0921274	-0.0132766	0.139623	0.13369	0.0894411	0.152085	-0.00486407	0.352209	-0.129505	-0.0669881	-0.124917	-0.0208569
1369259_at	Dio1	25430	deiodinase, iodothyronine, type I	-1.47594	-0.151212	0.000412874	-2.01397	-0.156996	-0.716882	-0.795547	-0.808756	-0.851678	-1.43246	-0.968922	-0.787667	-0.102084	0.184594	-0.0190254	0.31908	0.0889933	0.288646	0.40175	-0.0438511	0.34995	0.976437	0.014198	0.238459	-0.47621	0.12001	-0.326708	-0.770139	0.230508	0.0398102	-0.354907	-0.101555	-0.506503	-0.44431	-0.300739	-0.550074	-0.638577	-0.748441	-0.506907	-0.477886	0.14824	-0.289503	-0.0888996	-0.101087	0.226215	0.0774877
1369265_at	Senp2	78973	Sumo1/sentrin/SMT3 specific peptidase 2	0.198501	0.133154	0.120904	0.25093	0.151976	0.0374056	0.164619	-0.0498802	0.0177515	0.218627	0.138078	-0.043686	0.146898	0.487094	-0.0208143	0.159468	0.104041	0.165835	0.155499	-0.109884	0.147541	0.286454	0.0210754	0.00831215	0.00915765	-0.283123	0.072654	0.0479416	0.0533735	0.0274061	0.267195	0.00702434	0.240699	0.18926	-0.000136262	0.143987	0.295205	-0.062846	0.101554	0.145779	0.0975128	-0.00725265	0.125578	-0.0537682	0.0922337	-0.0794597
1369266_at	Il13ra2	171060	interleukin 13 receptor, alpha 2	-0.52873	-0.154953	-0.173001	-0.297126	0.130743	-0.06818	-0.389943	-0.0394564	-0.308315	-0.554854	-0.0962273	0.150894	-0.641873	0.246985	0.175245	-0.407775	0.145456	0.12387	-0.629935	-0.254421	0.129564	-0.599511	0.195925	0.272143	-0.275073	-0.484013	-0.459479	-0.251371	0.10827	0.141598	-0.0275078	0.0984868	-0.174385	-0.0567571	-0.0935608	-0.246615	0.161324	0.304885	0.251201	0.634619	0.578555	0.510929	-0.716434	-0.464713	-0.179133	-0.0930794
1369270_at	Nr1i2	84385	nuclear receptor subfamily 1, group I, member 2	0.122097	-0.375826	-0.138425	0.00648047	-0.0671451	-0.215739	0.00668976	0.0105876	-0.0481155	-0.0260691	-0.117424	-0.270157	-0.0888676	0.136431	0.138015	-0.118063	-0.177058	-0.133559	-0.190465	-0.281011	-0.0528406	0.0151332	0.000348721	0.0324485	-0.0122988	-0.0536251	-0.0852596	-0.0814084	-0.0307193	-0.0209056	0.0426497	-0.0855416	0.0964932	-0.216604	0.0922588	0.101314	-0.370625	-0.233276	-0.439318	-0.195591	-0.238296	-0.0580481	-0.415308	-0.101423	-0.172819	-0.123569
1369278_at	Gna12	81663	guanine nucleotide binding protein (G protein) alpha 12	-0.100004	0.202269	0.0792043	-0.295726	-0.00238256	-0.00180564	-0.243013	-0.0716237	-0.0875635	-0.478045	0.0428186	0.183554	-0.143096	0.232965	-0.0538398	-0.0367811	-0.1735	-0.0451845	0.0412513	0.0676614	0.199231	0.0108369	0.110008	-0.201528	0.0741268	-0.104069	-0.0808416	0.538663	0.0890441	0.33021	0.366937	0.10862	0.227241	0.468279	0.165263	0.294558	0.192962	0.182972	0.0937215	0.391618	0.116399	0.293115	0.037401	-0.0486504	0.170466	0.193455
1369284_at	Barhl2	65050	BarH-like homeobox 2	-0.247253	-0.171534	-0.0902512	0.0263167	-0.0438073	0.0269513	0.00702451	0.0319677	-0.0407311	-0.097546	0.105293	0.0173562	0.114617	-0.240099	-0.0341433	-0.0281013	-0.0561525	-0.00732012	-0.162584	-0.0188664	-0.319421	-0.119556	-0.0482984	0.0484611	-0.00129372	0.258584	-0.0117072	0.0193939	0.0903586	0.0775199	0.0754138	0.201812	0.157861	0.00958244	-0.0313904	-0.030895	0.0413202	-0.026466	-0.0866944	-0.194134	0.0550562	-0.0664993	-0.131817	-0.0501807	-0.304036	0.0325119
1369289_at	Hnf4a	25735	hepatocyte nuclear factor 4, alpha	0.292418	-0.124081	0.174944	0.158454	0.176218	0.247349	0.20837	0.191954	-0.00273685	0.109077	0.0269023	-0.162279	-0.271257	0.468583	-0.131191	-0.331468	-0.269054	-0.201095	0.252008	0.0186906	0.279706	0.0553577	-0.0234317	-0.0979137	-0.26036	-0.0118263	-0.108208	-0.0810375	-0.0449013	0.0553534	-0.329137	-0.246837	-0.146408	-0.104853	0.19639	0.190373	-0.0512463	0.162644	-0.171588	-0.56371	-0.19194	-0.193841	-0.247073	-0.0452276	-0.163291	-0.194614
1369291_at	Agtr1a	24180	angiotensin II receptor, type 1a	0.30882	0.0850148	-0.0970962	0.0786503	0.0321264	0.134388	-0.0874966	-0.0828326	-0.172388	0.138754	0.123214	0.029645	-0.44687	0.488468	0.181663	-0.34013	-0.156269	-0.170767	-0.035988	-0.0840867	0.117981	-0.00163042	-0.0660797	0.0467449	-0.255519	0.209188	-0.01745	-0.566448	-0.0727589	-0.20942	-0.194713	-0.0877033	0.0123726	-0.178936	-0.0953293	-0.164668	-0.486862	-0.0703157	-0.275511	-0.545455	-0.24578	-0.351409	-0.207175	-0.0993986	-0.198535	-0.0961754
1369304_at	Pts	29498	6-pyruvoyl-tetrahydropterin synthase	0.269126	0.0929457	0.204333	0.170791	0.140784	0.0631445	0.0166873	-0.00159882	-0.054976	0.244709	0.00926562	0.18751	0.230845	0.103942	0.266633	0.0727116	-0.0660156	0.137607	0.470707	0.00850814	0.361071	0.241034	0.108281	0.153748	-0.000541238	-0.122849	0.193035	0.112433	0.0391365	0.240196	-0.102987	0.0579029	-0.111519	-0.185555	-0.0860585	-0.172604	0.15287	0.205871	0.175347	0.140388	-0.164819	0.297839	0.182598	-0.116681	0.0747453	0.190164
1369312_a_at	Csnk1a1	113927	casein kinase 1, alpha 1	0.167827	0.0393852	0.0710101	0.160846	0.159957	0.156857	0.0763473	0.0669146	0.053007	0.119302	0.0181042	0.00887717	-0.205317	0.31964	0.00600005	-0.254808	0.0401101	-0.104638	0.0643256	0.128753	0.156619	-0.0222206	-0.0241809	0.00841994	-0.0655045	-0.084706	0.0477834	-0.161411	-0.0496919	-0.000666056	-0.0558893	-0.170285	0.0219109	0.0327618	-0.0354767	-0.00865285	0.0308894	-0.0717324	-0.0289669	-0.137452	-0.172136	-0.125224	-0.195895	-0.021191	0.0995242	-0.0563608
1369318_at	Fhit	60398	fragile histidine triad	0.6563	0.23167	0.26232	0.359178	0.00861332	0.239659	0.0246005	-0.259457	0.107589	0.368968	0.100927	0.0072261	0.0774785	0.14439	-0.0534686	0.0877383	-0.151978	-0.161141	-0.0659008	-0.219102	0.0593435	0.359995	0.0963439	-0.0239803	-0.0853886	0.124885	-0.0913422	-0.275557	-0.00359276	-0.34414	0.141534	0.0481887	0.220029	-0.0558629	0.205523	0.143709	0.0381645	0.0300498	-0.043877	0.0855717	0.00856219	0.0210701	-0.123714	-0.122665	-0.333879	0.191464
1369319_at	Arl6ip5	66028	ADP-ribosylation factor-like 6 interacting protein 5	-0.219362	0.00613222	-0.0483082	-0.0460013	-0.0229334	0.0641852	0.0867201	0.0941622	0.0411083	-0.121175	-0.0534007	-0.014424	-0.0654922	0.233704	0.218006	0.0266513	-0.112113	-0.0596993	0.110788	-0.0384209	0.0334906	-0.0684636	0.0240424	-0.0137944	0.149654	-0.0920855	0.11142	-0.046598	-0.0523259	-0.109657	-0.0532167	-0.0582439	-0.0313796	-0.00274032	-0.0147113	0.0176776	0.127262	-0.115099	0.149721	0.252384	-0.110087	-0.0540108	0.0455969	-0.0429802	0.19752	0.24207
1369322_at	Kcne2	171138	potassium channel, voltage-gated Isk-related subfamily E regulatory beta subunit 2	-0.133342	-0.102761	-0.0681872	0.126433	0.188788	0.000385483	-0.00713217	0.131018	0.0894273	-0.0496569	-0.12513	0.0369338	0.139672	-0.0079777	0.0465912	-0.329636	-0.347971	-0.171295	-0.109126	0.00784804	-0.273055	-0.0756539	0.17799	0.0382381	0.0574058	-0.0449795	0.0845518	0.0226475	-0.0196533	0.0469187	-0.0762429	0.309544	0.0581919	-0.0564693	0.17963	0.091251	-0.0909368	0.0265308	-0.0340187	-0.184048	-0.147111	-0.263646	-0.132459	-0.0417021	-0.158369	-0.286856
1369323_at	Leprot	56766	leptin receptor overlapping transcript	-0.0223086	0.085879	-0.0256916	0.146843	-0.0710883	0.00192811	0.0342162	-0.161508	-0.122838	0.145407	0.12354	0.200463	-0.268655	0.343375	-0.0621681	-0.119454	-0.107401	-0.11518	-0.0235418	-0.025268	0.256925	0.0353512	0.00373823	0.0437627	-0.00438903	-0.0611038	-0.0345205	0.110793	0.089109	0.100171	0.0671391	-0.118938	0.0668946	-0.114818	0.0289726	-0.022368	-0.0361602	-0.021152	0.0184301	0.255488	-0.0181907	0.0516821	-0.0636811	-0.0484324	0.0677982	-0.0487332
1369328_at	Acacb	116719	acetyl-CoA carboxylase beta	1.44068	0.0420844	-0.14184	1.73781	-0.344971	-0.0232744	0.55476	0.401223	0.341901	0.455057	0.0126314	0.175727	0.207248	0.465135	-0.109558	-0.0702269	-0.17082	-0.187826	0.354247	0.285893	0.290089	-0.510309	-0.163914	-0.273286	0.0923401	0.184176	0.342973	-0.00506081	0.0309421	-0.0271352	0.111622	0.386965	0.447806	0.130016	0.190045	0.268691	-0.0813583	-0.0521886	-0.0978933	-0.31893	-0.0795441	-0.243732	-0.033154	0.0350256	0.105063	0.337475
1369329_at	Notch3	56761	notch 3	-0.170731	-0.0303965	-0.204228	-0.169204	0.0521701	-0.157505	-0.0796943	-0.0329526	-0.0349061	-0.0564872	-0.143747	-0.100285	0.0870479	-0.064014	-0.125439	-0.0963327	-0.17663	0.187639	-0.174398	-0.110262	-0.249861	-0.0162257	0.164463	0.191394	0.0571927	0.0719594	0.127404	-0.0230573	0.0632876	0.100622	-0.13177	0.0694543	0.000205451	0.0453167	0.137531	0.0916916	-0.129317	-0.0484	-0.219042	-0.244457	0.0290425	-0.0553631	-0.097321	0.132673	-0.131691	-0.090086
1369334_at	Kcnma1	83731	potassium channel, calcium activated large conductance subfamily M alpha, member 1	-0.341275	-0.0640118	-0.124376	-0.147797	0.0931917	-0.0249085	-0.0569749	0.00645636	0.170185	-0.0443248	-0.0555105	-0.115834	0.27329	-0.0771676	-0.0183879	-0.106643	-0.163375	-0.0265933	-0.159204	-0.146558	-0.150574	0.0994057	0.184542	0.108572	-0.0458913	-0.093236	0.0676271	0.162143	0.00377163	0.0352503	-0.0485563	0.163824	0.0993618	0.010825	-0.10013	0.0299463	-0.216328	-8.5966e-05	-0.197042	-0.197905	0.00785708	-0.111094	-0.0279664	0.0990932	-0.0910132	-0.0202882
1369336_at	Hr	60563	hair growth associated	-0.191859	0.0816162	0.0158209	-0.0188698	-0.0958514	-0.0292068	0.0132131	0.0023843	-0.0561853	0.00181572	0.0039863	0.0106124	0.24054	-0.133184	0.120865	-0.152259	-0.0992601	-0.0797695	-0.363705	-0.113282	-0.544867	0.168768	0.0465292	0.0482283	0.180046	0.253267	0.266642	0.246038	0.0602282	0.129779	0.0955844	0.217605	-0.0376928	-0.111281	0.103057	-0.0726913	-0.186615	-0.109599	-0.180419	-0.241737	0.0150199	-0.192895	-0.0296089	0.00668995	-0.0910965	-0.0929879
1369351_at	Cntn3	54279	contactin 3 (plasmacytoma associated)	-0.244775	-0.121052	-0.0789776	0.0793917	0.0511124	0.23531	0.00525763	0.00852609	0.184354	0.118069	-0.0306482	-0.0583565	0.192089	-0.0924676	0.0506624	-0.0659219	-0.0737195	0.130805	-0.0733225	-0.0852627	-0.230291	-0.123931	0.05257	-0.0548017	0.078689	0.107673	0.0311305	-0.0929035	0.0838109	-0.0629164	0.107404	0.160027	0.110757	0.000450101	0.038433	0.172149	-0.207043	-0.0786835	-0.206167	-0.183715	-0.19194	-0.210129	-0.0158732	0.16503	-0.174641	0.0185715
1369352_at	Hipk3	83617	homeodomain interacting protein kinase 3	0.375347	0.0627899	0.0656626	0.338462	0.0390941	0.0664313	0.0854101	-0.0781563	0.0531802	0.279929	0.000843278	0.0135346	-0.368521	0.819484	-0.183953	0.078513	0.0481777	0.0865661	0.171839	-0.186312	0.475605	0.475023	0.114568	0.096685	-0.104951	-0.196327	0.0368772	-0.137285	0.00582644	0.0278241	0.213872	-0.0087264	0.286903	-0.149371	0.0351999	-0.0386385	0.0562031	-0.0575384	0.0973446	0.167323	-0.0975953	-0.114961	0.380863	0.0710943	0.331882	0.267596
1369354_at	Csf1	78965	colony stimulating factor 1 (macrophage)	-0.0923075	0.0679263	-0.0380711	-0.0242999	0.0614766	-0.0711255	0.214167	0.155758	0.177377	0.158972	-0.0258451	-0.0420298	0.232256	-0.0841338	0.00941571	0.05519	-0.0115781	0.151159	-0.160159	0.0726892	-0.187133	-0.0154516	-0.083105	-0.041804	-0.1596	0.0298203	-0.0571769	0.0700286	0.126995	0.0730052	0.0259487	-0.0164036	0.0529737	0.0514233	0.132307	0.109839	-0.0929803	-0.0179986	-0.155346	-0.0867472	0.0987001	-0.0516965	-0.041107	0.0382133	-0.146156	-0.0738057
1369358_a_at	Hap1	29430	huntingtin-associated protein 1	-0.0160002	0.044522	-0.0750877	-0.05445	0.0747366	-0.149928	-0.0604786	0.0968711	0.0579948	0.0971325	-0.0247776	0.00161601	0.216878	0.0327866	-0.129255	0.0796353	-0.114792	0.0241378	-0.121649	0.114727	-0.269228	0.057415	0.120181	0.124484	0.126499	0.23432	0.144108	0.0661811	-0.0670124	0.0413214	-0.0763327	0.0224582	-0.050238	-0.076561	0.0691572	0.0717749	0.0524699	0.157414	0.0608475	0.0916047	0.00854122	-0.00272524	-0.0839098	-0.0144568	-0.287759	0.210505
1369359_at	Il9r	24500	interleukin 9 receptor	-0.196286	0.015379	0.00653417	-0.127465	0.0984393	-0.190092	0.0153185	0.179849	0.00876059	0.0190885	-0.0162978	0.190826	0.213918	-0.237829	0.228652	-0.156946	-0.339247	-0.0433976	-0.506957	-0.135897	-0.620008	-0.103314	-0.223271	-0.0053786	-0.158665	0.0224897	-0.197014	-0.261511	-0.014804	-0.325203	-0.0606217	0.0894381	-0.181259	-0.254451	0.0344646	-0.25479	-0.234825	0.12291	-0.117683	-0.257946	0.084653	-0.231812	0.159472	0.340637	0.108693	-0.109861
1369365_at	Pde3a	50678	phosphodiesterase 3A, cGMP inhibited	-0.286822	0.0075046	0.0434118	-0.0300781	-0.0698863	-0.0481526	-0.132688	0.0795341	0.0487684	-0.00168282	0.149917	-0.0169847	0.0130004	-0.0791653	0.107366	0.0400341	0.0885437	0.0291402	-0.147291	-0.0771963	-0.123473	-0.0404197	-0.157638	-0.192744	-0.170411	0.0273405	-0.0232921	-0.11551	-0.0422685	-0.0110297	0.054662	0.145944	0.0792774	0.0233258	-0.0801709	-0.0124287	-0.22616	-0.135665	-0.244541	-0.254761	-0.0298588	-0.0987948	0.0970701	0.156413	0.121019	-0.0872848
1369390_a_at	Dpp6	29272	dipeptidylpeptidase 6	-0.45784	0.331253	0.305707	-0.599845	0.139606	0.0155722	-0.249882	-0.317841	-0.329356	-0.127175	0.173229	-0.00793811	-0.0337539	0.168626	-0.0230579	-0.176769	-0.242231	0.0446346	-0.126107	-0.118367	0.0224049	-0.540689	-0.292463	-0.149696	-0.337476	-0.0394187	-0.151887	-0.223714	-0.233513	-0.160875	0.270321	-0.0406392	0.117659	0.135722	0.0410463	0.00631943	-0.188146	-0.16739	-0.00585497	0.0950133	0.298767	-0.0297008	0.143232	-0.0383023	-0.0746433	-0.218737
1369393_at	Map3k8	116596	mitogen-activated protein kinase kinase kinase 8	0.315818	-0.0612423	0.115974	-0.0542974	-0.311685	-0.0444708	0.0878883	0.0116141	-0.0224248	0.172724	0.0188844	-0.0277547	-0.0925024	0.690023	0.15402	0.0101643	0.367938	0.295327	0.0164551	-0.0386321	0.218988	0.382522	0.283037	0.323156	0.108946	0.317178	0.164753	-0.183759	-0.120516	-0.200766	-0.0407868	-0.0574398	-0.19413	0.0884886	-0.107556	-0.10081	-0.0720235	-0.0957047	-0.0346419	0.218632	0.12443	0.172792	0.110511	-0.0562135	0.329974	-0.0939933
1369400_a_at	Pfkfb2	24640	6-phosphofructo-2-kinase/fructose-2,6-biphosphatase 2	-0.101823	0.0829386	-0.0144282	-0.394355	0.0372915	-0.212596	0.126425	-0.0306572	-0.063378	-0.0292574	-0.0562943	0.0188911	0.25057	-0.0447847	0.119301	0.0339553	-0.109088	0.0866953	-0.171783	-0.0974504	-0.426979	-0.104868	-0.0681677	-0.00121375	0.0832941	0.036104	0.0296434	0.00363088	0.137509	0.126698	-0.162598	-0.00581478	0.0578488	-0.0632158	-0.0167813	-0.0637257	-0.138192	0.0272458	-0.232937	-0.187906	-0.0225635	-0.166993	0.149752	-0.11644	-0.174965	0.0647814
1369402_at	Adnp	64622	activity-dependent neuroprotector homeobox	0.0729244	-0.0267311	0.0620017	0.0175139	0.0252891	0.039771	0.0347711	-0.109978	-0.104955	0.18942	0.120181	0.170987	-0.491255	0.17569	-0.154047	-0.223245	-0.0344765	-0.0706752	0.144124	-0.0224357	0.195155	-0.0331617	-0.0464937	-0.0920556	-0.076386	-0.0388557	-0.0232313	-0.0436575	0.016078	-0.0241404	-0.162639	-0.0841875	-0.0759921	0.274106	-0.0792267	-0.0203117	-0.0409943	0.0697178	0.108549	-0.180507	0.0196926	-0.0932484	-0.0680429	0.0731876	-0.00947382	-0.0101887
1369407_at	Tnfrsf11b	25341	tumor necrosis factor receptor superfamily, member 11b	-0.0402841	0.100162	0.304575	0.456464	-0.0300504	0.0337224	0.156745	0.0812687	-0.0761117	-0.152325	-0.293397	-0.294631	-0.242606	-0.118268	-0.15834	0.0619079	-0.128106	0.0492643	0.00920928	-0.315264	-0.247637	0.255756	-0.0128659	0.107615	-0.183839	0.026025	0.052001	-0.00943833	-0.0923716	-0.183099	0.356143	0.0973055	0.216223	-0.164142	0.118177	-0.0343981	0.59862	0.222337	0.461293	0.499752	0.276439	1.03414	0.29087	0.218668	0.288949	0.4467
1369409_at	Nab1	64824	Ngfi-A binding protein 1	0.511836	0.104449	0.172164	0.351721	0.0378218	0.0700123	-0.00907716	-0.0421567	0.0315192	0.228845	0.133828	0.0862648	-0.154539	0.298639	-0.134455	-0.014703	-0.0470065	-0.051339	0.156342	0.0313742	0.194909	0.348747	-0.000480759	-0.109044	-0.110721	-0.0861169	-0.107937	0.00274079	-0.0730713	0.0702825	0.0447993	-0.077778	-0.0580695	0.0379771	0.101492	0.0178863	0.259442	0.109477	0.171678	0.186027	-0.043081	0.196854	0.241353	-0.0406282	0.127712	0.114624
1369414_at	Stxbp3	114095	syntaxin binding protein 3	-0.0991069	0.155615	0.0128181	-0.156891	0.0467697	0.0407684	-0.00874885	0.0304226	-0.00394434	0.0347901	0.0990369	0.0851974	-0.179627	0.179985	0.0392344	-0.0358137	-0.0161415	-0.0837928	-0.0350086	-0.129141	0.183004	-0.094586	-0.0307453	-0.0563524	0.0123384	0.0333667	0.118369	0.00124961	-0.0606375	-0.0415119	0.0319419	0.0614512	0.106142	0.0443683	-0.0481056	0.10804	-0.123571	-0.109326	0.0026545	-0.0638073	-0.0647973	-0.0439335	-0.157324	-0.0568183	-0.0494828	-0.137093
1369415_at	Bhlhe40	79431	basic helix-loop-helix family, member e40	0.293177	0.322393	0.430822	-0.0327459	0.389857	-0.272231	-0.488261	-0.409177	0.423613	-0.79657	0.774942	-0.152045	-1.13383	-0.779548	-0.690242	-0.209773	0.435006	0.781767	1.44636	0.476791	0.384291	-0.496693	-0.632162	-0.429818	-1.12016	-0.935484	-0.318914	-0.451178	0.0344305	-0.0983178	0.0514612	0.570138	0.223985	0.489834	0.473371	0.131189	-0.630891	-0.159763	0.0197873	-0.632347	0.338064	-0.0550524	0.14226	0.420534	-0.0523271	0.302327
1369417_a_at	Opcml	116597	opioid binding protein/cell adhesion molecule-like	-0.144441	0.0869239	-0.0517209	-0.148832	-0.121925	-0.137778	-0.187056	0.0114014	0.0785822	-0.307588	-0.013631	-0.0252281	0.177804	-0.113181	-0.0380154	-0.193612	-0.246179	-0.261916	-0.108804	-0.154485	-0.320097	-0.119056	0.114508	0.100835	-0.0484632	-0.0935526	0.0851783	-0.024248	0.0797979	0.0315646	-0.0846087	0.0399059	-0.100492	-0.183528	0.0282372	-0.088414	0.034622	0.0129399	-0.0180713	-0.00404513	0.0533801	0.160052	-0.138885	-0.0921006	-0.263681	0.0241515
1369421_at	Top1	64550	topoisomerase (DNA) I	0.0655735	0.00949762	0.0145439	0.355502	0.237384	0.176371	0.0294752	-0.0598302	0.0267339	0.13766	0.00769198	0.0440676	-0.164958	0.808865	0.0575872	-0.324469	0.0589487	0.0257217	0.518593	0.199774	0.333354	0.308139	-0.0293969	-0.00913871	0.0138584	-0.0508515	0.0692786	0.215361	0.0811704	0.171034	0.0771279	-0.161153	-0.088019	0.249998	0.00621221	0.198285	0.154855	0.168712	0.283714	-0.0150654	-0.0378511	0.0176086	0.163396	-0.0542692	0.202129	-0.0475258
1369422_at	Fap	192203	fibroblast activation protein, alpha	-0.248198	-0.0894293	0.0130596	-0.162323	0.0246986	0.0229246	-0.317862	-0.388348	-0.320388	-0.217942	0.0234078	0.00599219	-0.0142066	-0.199499	-0.111968	-0.0279743	0.000257662	-0.103587	-0.199559	-0.055145	-0.226793	-0.211397	-0.0771578	-0.0207052	-0.0456737	0.00404146	0.0145895	0.0250995	0.102276	0.124028	0.0221077	0.052806	0.103239	-0.0131494	0.0525319	-0.141261	-0.0744781	0.0658351	-0.0252605	-0.0861128	-0.10773	-0.112244	0.0155827	0.250728	-0.165231	-0.33347
1369424_at	Cyp2a2	24895	cytochrome P450, family 2, subfamily a, polypeptide 2	0.223574	-0.0678556	-0.021982	-0.298815	-0.0345975	-0.0742185	0.22874	0.045333	0.0998355	0.214601	0.0332218	0.0853369	0.20226	0.296307	0.177491	-0.0825078	-0.0315808	-0.132924	0.396884	0.139224	-0.10668	-0.0162316	0.162267	0.196339	0.323083	0.212514	0.267367	-0.00901931	0.0601414	-0.0164486	-0.212459	-0.0352961	-0.0227804	-0.0229965	0.182799	0.0738655	-0.124399	0.0384391	-0.208552	-0.328207	-0.0113516	-0.232793	-0.146583	0.0797135	-0.449327	-0.152088
1369427_at	Mpeg1	64552	macrophage expressed 1	0.302979	0.199432	0.346284	-0.0752913	-0.332694	0.0332028	0.361572	-0.0633097	-0.0627998	0.090667	-0.141698	0.081362	-0.555459	0.826956	0.0457094	0.0194153	0.0250321	0.349386	0.446216	0.0591558	0.506092	0.086444	0.172797	0.128981	-0.3328	-0.56453	-0.162282	0.287503	0.111465	-0.0854661	-0.563427	-0.29417	-0.449099	-0.432726	-0.129566	-0.389575	-0.112786	0.102534	0.11843	-0.51466	-0.0234305	-0.24384	-0.176108	-0.364105	0.364931	0.126205
1369430_at	Bco1	114106	beta-carotene oxygenase 1	-0.210625	-0.197713	-0.0165953	0.438557	0.502222	0.29284	0.220431	0.242389	0.284207	-0.00464418	0.0446725	-0.202285	0.0393863	0.144243	0.184095	0.278622	0.0693119	0.0528912	-0.112057	-0.080307	-0.239942	-0.542112	0.0327953	-0.0169935	0.0231599	0.384672	0.0840798	0.24335	-0.30268	0.229233	0.0581848	0.250941	0.348206	0.473471	0.601842	0.285923	0.467383	0.278751	0.110723	-0.927114	0.24518	-0.565989	-0.632802	-0.401685	0.213891	-0.342801
1369438_at	N5	64825	DNA binding protein N5	-0.160527	0.0343165	-0.169408	-0.164525	-0.204956	-0.212506	0.0128595	0.11377	0.0627816	-0.0304319	0.0225174	0.0427245	0.297782	0.0320982	0.175301	-0.100105	-0.0967533	-0.0643222	-0.111379	0.0656948	-0.0672613	-0.20312	-0.0284718	-0.0877126	0.145017	-0.0174672	0.0408461	-0.162866	-0.104156	-0.124946	0.00734897	0.119392	0.0835407	-0.104934	-0.0262696	-0.08773	-0.0478234	0.111255	-0.0693466	-0.29101	-0.127691	-0.0984189	-0.00426206	-0.107012	-0.276252	-0.0696983
1369440_at	Abcg8	155192	ATP-binding cassette, subfamily G (WHITE), member 8	0.81213	-0.440527	-0.419967	0.294866	-0.0550688	-0.183484	0.821987	0.612324	1.15273	1.67591	0.568002	0.776697	0.245086	-0.473176	0.937791	-0.426012	0.149816	0.95954	0.141143	0.544119	1.20181	-1.16027	0.471453	-1.23474	-1.35946	0.508814	-0.578236	-0.955868	0.111637	0.20522	-2.42823	-0.21571	-0.778253	-1.09576	-0.146752	-0.402909	-0.573267	0.131756	-0.662633	-1.15366	0.348059	-0.466986	-1.3089	-0.425071	-0.63338	-1.43116
1369443_at	Angptl2	171100	angiopoietin-like 2	-0.0882892	-0.0333139	-0.215359	-0.132759	-0.207796	0.0139923	0.0567468	0.122817	-0.0385624	-0.027852	0.335296	0.214798	-0.0943071	0.0971171	0.126793	-0.00965742	-0.154225	0.114746	-0.118964	-0.147379	-0.0666881	-0.255665	-0.188133	-0.183053	-0.116503	-0.149646	-0.153371	-0.018286	-0.0875161	-0.00694653	0.157676	0.0693733	0.105937	-0.0681577	0.0750995	0.0694954	0.0203041	-0.0838822	0.120642	0.235435	-0.00970344	0.432319	-0.0451495	0.051055	-0.134152	0.122478
1369445_at	Mre11a	64046	MRE11 homolog A, double strand break repair nuclease	0.238393	0.205118	0.0703461	0.288623	0.124329	0.109123	-0.049212	0.119042	-0.0473744	0.110539	0.120433	0.15387	-0.0229845	0.452008	0.286629	0.109235	0.121147	0.358017	0.102796	-0.273783	0.195816	0.198896	0.0893071	0.208964	0.18783	0.0240943	0.233144	0.179074	0.0234784	0.109364	0.223748	-0.104631	-0.00996729	0.105663	-0.0139718	-0.0150204	0.204032	0.155349	0.0348664	0.0596717	0.226746	0.0094564	0.142918	0.144726	0.0514009	-0.38957
1369450_at	Ust5r	171398	integral membrane transport protein UST5r	-1.40175	0.278427	0.426184	-1.57294	0.0965216	0.00206391	-0.143185	-0.120328	-0.147788	-0.232606	-0.0698022	0.0084208	-0.585544	0.0169239	-0.221465	0.156552	0.111176	0.126083	0.138849	-0.289956	0.129762	-0.251554	-0.0870629	0.0447298	-0.288527	0.0313898	0.0102439	0.0221754	0.0267864	0.114275	-0.30434	-0.0873054	-0.170926	-0.310892	-0.0974744	-0.0740321	-0.50349	-0.294956	-0.280248	-0.0447639	0.275227	0.211402	-0.0472905	-0.0459281	-0.494673	-0.595367
1369452_a_at	Picalm	89816	phosphatidylinositol binding clathrin assembly protein	0.0175349	0.0543258	-0.0132486	0.0250339	0.0250451	0.0642277	-0.0633328	-0.00470807	0.064518	-0.16708	-0.0742242	-0.131499	-0.368337	0.620564	-0.112868	-0.119236	-0.0793836	-0.0773047	0.29784	-3.09796e-05	0.203015	0.183619	0.0458672	-0.0858536	-0.021631	-0.162235	0.00627216	0.132105	-0.0236714	-0.0808575	-0.115116	-0.194634	-0.0771402	0.0756696	0.00741906	0.1273	-0.0488631	-0.0355944	-0.0661252	-0.276848	-0.131426	-0.0488061	0.0576216	0.10298	0.106205	0.138939
1369453_at	Epn1	117277	Epsin 1	-0.12343	-0.00122442	-0.0335255	-0.0798565	0.0365105	0.0548631	-0.115074	-0.0968433	-0.0508474	-0.0090379	0.00328859	0.257133	-0.0574738	-0.131936	-0.0510669	-0.127683	-0.130612	-0.164301	-0.159299	0.0228822	-0.0173223	-0.0135932	-0.107643	-0.00938004	-0.0100892	-0.0470917	-0.0241537	0.0768889	-0.050346	-0.00721198	-0.22212	-0.0920656	-0.179959	0.161944	0.104649	0.0558321	0.0308895	0.0533993	-0.212827	0.128706	0.0400822	0.291347	0.310502	0.0967321	0.111392	0.257187
1369455_at	Abcg5	114628	ATP-binding cassette, subfamily G (WHITE), member 5	1.20647	-0.842086	-0.483039	1.01103	0.0357745	0.00872531	1.21592	0.859791	1.08477	1.61424	0.548238	0.760579	0.431639	-0.497929	0.935889	-0.233481	0.330248	1.05532	0.052264	0.470004	1.15691	-1.0122	0.254433	-1.14472	-1.10357	0.364914	-0.509596	-0.970617	0.06983	0.282298	-2.09654	-0.146506	-0.493827	-0.827021	-0.182306	-0.400654	-0.610825	0.111557	-0.639602	-1.26658	0.348937	-0.777866	-1.46518	-0.737125	-0.946971	-1.3124
1369459_at	Pip4k2b	89812	phosphatidylinositol-5-phosphate 4-kinase, type II, beta	0.247847	0.113119	0.124468	-0.0381794	-0.0670356	-0.275607	-0.150933	-0.0313909	-0.0693576	-0.0461207	0.051749	-0.0689645	-0.270452	0.348031	0.0217183	-0.137496	-0.00296329	0.0778052	0.216217	0.301844	0.250235	-0.17514	-0.132688	0.0404408	-0.122322	-0.196436	-0.0788318	-0.159033	0.0663212	0.0807594	-0.0701702	-0.0803791	-0.125099	0.0353623	0.118986	0.073571	-0.300778	-0.282307	-0.338234	-0.104634	0.0162819	-0.116497	-0.10524	0.14097	-0.206937	-0.080015
1369460_at	Slc7a2	64554	solute carrier family 7 (cationic amino acid transporter, y+ system), member 2	0.0180769	-0.248693	-0.122608	-0.203273	0.400179	0.202597	-0.160861	0.129939	0.0227489	-0.13311	0.0553922	-0.107027	-0.316934	0.125545	-0.153213	-0.185847	0.17496	0.15175	0.390538	0.0594487	0.198395	-0.0433577	0.23613	0.0302311	-0.349087	-0.10342	-0.0669163	-0.363508	-0.14376	-0.134169	-0.355362	-0.28922	-0.214478	-0.351731	-0.0754047	-0.059589	-0.344818	-0.17735	-0.239454	-0.135217	-0.0956855	-0.230697	-0.116841	-0.10193	-0.212133	0.00728267
1369463_at	Htr5a	25689	5-hydroxytryptamine (serotonin) receptor 5A, G protein-coupled	-0.176706	-0.0124488	-0.271237	-0.0747624	-0.118393	-0.214314	0.0484417	0.153448	0.040268	0.02045	-0.0446609	-0.202667	0.312897	-0.26663	-0.161874	-0.00979165	-0.00937452	0.1657	-0.343233	-0.141874	-0.339425	0.0455456	-0.203358	-0.0508031	0.0239751	0.0936322	0.0905036	-0.164291	-0.224955	-0.0859363	0.136195	0.286862	0.128896	-0.131431	0.0691156	-0.00259221	-0.0579082	0.0987634	-0.0942737	-0.0833437	-0.167176	0.148287	-0.19639	0.266815	-0.296856	0.118724
1369467_a_at	Pfkfb1	24638	6-phosphofructo-2-kinase/fructose-2,6-biphosphatase 1	0.419966	-0.109468	-0.0118573	0.414567	-0.0731837	-0.138703	-0.301864	-0.304929	-0.180199	-0.431466	-0.320031	-0.199718	-0.410668	-0.378826	-0.271816	-0.118282	-0.0635496	-0.0642722	0.266421	-0.247611	0.207307	-0.823149	-0.0864518	-0.395713	0.210488	-0.165634	-0.0312749	0.596583	0.25848	0.326791	0.351904	0.134795	0.446972	0.195523	0.304142	0.445641	-0.118237	0.0089544	-0.230331	-0.0504951	0.0769622	0.0194193	-0.352289	-0.117161	-0.368899	-0.219106
1369468_at	Fzd4	64558	frizzled class receptor 4	0.252917	-0.178452	-0.218822	0.428567	0.211455	0.0554125	-0.00682761	-0.134007	0.124933	0.325311	0.0357435	-0.183245	0.408798	0.387948	0.282441	-0.0466683	-0.33037	-0.0565359	0.183533	0.0359874	0.140934	0.387413	0.190435	0.154428	0.177366	0.262688	0.0731074	-0.201778	0.0777115	0.0584356	-0.373634	-0.335408	-0.330107	-0.0985697	0.132819	-0.00478631	-0.411605	-0.00019013	-0.471833	-0.51392	-0.23547	-0.364445	-0.132013	0.535133	0.264388	0.128542
1369470_at	Akap14	60332	A kinase (PRKA) anchor protein 14	-0.270314	0.112149	-0.0363385	-0.129962	0.0222263	-0.122921	0.132204	0.084705	0.182416	-0.0355812	0.143392	0.0582023	0.288959	0.0481404	-0.0370318	0.0145479	0.181176	0.116537	0.0181447	0.0025691	-0.0130145	-0.0548396	-0.127545	0.0428265	0.116216	0.0442644	0.122634	0.105032	0.129562	0.0520193	0.0294499	0.0676671	-0.0165098	-0.211793	-0.0773228	-0.136189	-0.0183294	0.0346957	0.0274333	-0.075893	0.181383	0.0951301	-0.0951964	-0.169572	-0.35831	0.050059
1369472_a_at	Atf2	81647	activating transcription factor 2	0.0938993	0.120758	-0.00754031	0.290174	0.0367707	0.0107051	-0.0676147	0.09642	0.00687512	0.420183	0.395106	0.139364	-0.331236	0.541816	-0.263594	-0.0427067	-0.00121587	-0.0731809	0.153146	-0.0896986	0.167537	0.407542	0.113606	-0.0236171	-0.0583288	-0.0894081	0.0609915	0.232381	-0.137617	0.0189261	0.0944649	-0.0946409	0.121596	0.259426	0.129164	0.186827	0.00803001	-0.00978395	0.136003	0.0534699	-0.0055292	-0.158343	0.158677	0.141447	0.127875	0.198193
1369473_at	Pgm1	24645	phosphoglucomutase 1	-0.27518	-0.0487521	-0.0267698	-0.236984	0.159085	-0.041294	-0.148943	0.0855722	0.122377	0.0264781	0.00811205	0.109437	-0.287918	0.128206	0.0854452	-0.214787	-0.0718338	0.0876503	0.0965108	0.0736177	0.250973	-0.0186849	-0.0104546	0.0398923	0.0198655	0.262372	0.151841	-0.195502	-0.222712	-0.0413956	-0.211389	-0.0880582	-0.156536	-0.0486987	-0.0339247	0.0161408	-0.20103	-0.0686743	-0.183349	-0.342502	0.00570627	-0.121304	-0.226795	0.0203865	-0.0273543	-0.0156186
1369483_at	Cd4	24932	Cd4 molecule	0.00898429	-0.120797	0.120252	0.189981	-0.0379632	-0.0305738	0.130401	-0.0275204	-0.165787	-0.201727	-0.175419	-0.059466	-0.112435	0.350137	0.0675062	-0.0643821	-0.117342	0.0408715	-0.181765	-0.0595465	-0.270849	-0.249658	-0.0108031	0.0674506	-0.0200494	-0.0244661	-0.0621154	0.00201875	0.133323	0.106247	0.227093	-0.213348	-0.0531665	-0.112563	-0.189191	-0.113592	0.178232	0.127677	0.0887176	-0.0619094	-0.0603642	0.158509	0.127589	0.0497932	0.0177699	0.306474
1369485_at	Acot12	170570	acyl-CoA thioesterase 12	0.591099	-0.00805166	0.0448623	0.322584	-0.0132146	-0.109984	0.0640708	-0.268251	-0.214387	0.414312	-0.204999	-0.148977	-0.167854	0.328678	-0.147097	-0.014839	-0.0595874	0.028962	-0.104678	-0.231951	0.135249	0.128306	-0.00804648	0.0502426	0.0709875	-0.0403812	0.0520665	0.0707963	0.0359366	-0.110769	0.211334	0.0351802	0.191162	-0.0714945	-0.0976731	-0.1108	-0.224328	0.0493066	-0.292784	0.124492	0.0986647	0.254063	-0.097985	-0.0329414	-0.0731899	0.211928
1369491_at	Dao	114027	D-amino-acid oxidase	-0.753208	-0.0908553	0.215595	-0.788762	0.117319	-0.166847	0.0848057	-0.177515	-0.0852254	-0.253366	-0.154624	-0.401192	-0.182006	-0.00860646	-0.0204825	0.0171213	-0.0205877	0.129912	0.400446	-0.0466428	0.291496	-0.0818796	0.00235765	0.0257643	-0.0521485	0.199495	0.100042	0.0111104	-0.132994	-0.392429	-0.0962828	-0.424235	-0.430809	-0.23651	-0.206419	-0.0540477	-0.122782	0.189231	0.165828	-0.430923	0.0438567	0.0309562	-0.166433	0.413684	-0.0793987	-0.607612
1369492_at	Aadac	57300	arylacetamide deacetylase	-1.14734	-0.167764	-0.38374	-0.674007	-0.00761304	-0.19458	-0.573447	-0.0535131	-0.164747	-0.417616	0.0777506	0.0975199	-0.38427	0.189787	0.0606994	-0.0737755	0.117319	0.107672	-0.197469	-0.116033	0.0019849	-0.235343	0.0410016	0.152432	-0.353053	0.0261133	-0.144249	-0.375257	0.000497443	-0.137488	-0.0366894	-0.0303286	-0.0512788	-0.220853	-0.141875	-0.226128	-0.815171	-0.230324	-0.322412	-1.0184	-0.016036	-0.371203	-0.61094	-0.0751021	-0.377575	-0.50114
1369495_at	Crhr2	64680	corticotropin releasing hormone receptor 2	-0.190895	-0.0827752	0.00907304	-0.134751	-0.040421	-0.0766138	-0.0878925	-0.0364192	-0.0359568	-0.223215	-0.174769	-0.0796114	0.181137	0.129306	0.0657997	0.336505	0.0569279	0.187015	0.110158	0.0211374	-0.0968864	0.236439	0.144821	0.190461	0.112571	0.147359	0.0316491	0.0807883	0.0841409	-0.0708137	-0.0956032	0.0216214	-0.0680747	-0.112793	-0.0136743	0.102992	-0.107744	0.120181	-0.184888	-0.0249338	-0.00891438	-0.0732749	0.25173	0.129488	-0.00139575	-0.102832
1369499_at	Tyms	29261	thymidylate synthetase	-0.468481	-0.0756519	-0.132523	0.155126	-0.0472839	0.347865	-0.282792	-0.130383	-0.0676067	-0.210383	0.119918	0.0267313	-0.575492	0.110412	-0.224998	0.313068	0.0466406	0.0299402	-0.263755	-0.0802548	0.195604	-0.720828	0.0242465	-0.0698516	0.167917	0.269575	0.395291	0.156149	0.0343951	0.0501693	0.425131	-0.123465	0.040459	-0.104183	-0.128532	0.00624636	0.990831	0.165163	0.708693	0.566085	0.210116	0.306462	0.2132	0.122196	0.37776	0.439532
1369501_at	Zfp260	53982	zinc finger protein 260	0.0386134	-0.106053	-0.0180206	0.0669524	-0.0133177	-0.000118494	-0.076375	-0.109572	0.00591689	-0.210341	0.240979	-0.115867	-0.102388	0.602754	-0.126436	-0.428605	0.0382632	-0.0722735	0.126042	-0.167834	0.130337	0.214703	-0.0380141	0.151574	-0.0459306	-0.163856	0.0947633	0.0197051	0.0279551	-0.0267548	0.137585	0.100844	0.245619	-0.0857811	0.190808	0.0676787	-0.0505645	-0.0623661	0.193789	-0.282994	0.112354	-0.181555	-0.0062537	0.164883	0.163981	-0.130371
1369504_at	Tgfbr1	29591	transforming growth factor, beta receptor 1	0.0344287	-0.127953	-0.0179061	-0.00246242	0.281206	0.291189	0.0619227	-0.0247214	-0.122109	0.20203	0.277228	0.263803	-0.145775	0.453505	-0.444792	-0.329365	0.0793466	-0.02071	0.0820837	-0.290376	0.113908	-0.124426	0.0213223	-0.0836855	-0.121103	-0.458276	0.0566405	-0.070549	0.158862	0.0325559	0.211617	-0.000858924	0.111485	0.0558375	0.0741945	0.156113	0.318223	0.000731222	0.233885	-0.023781	0.169568	0.0101425	0.103874	0.018695	0.270551	0.420656
1369505_at	Cds2	114101	CDP-diacylglycerol synthase (phosphatidate cytidylyltransferase) 2	-0.135991	-0.123488	0.0458296	0.243544	0.124314	-0.194414	0.110726	-0.0297036	-0.0490166	0.304409	-0.452044	-0.493952	0.282612	-0.0747143	0.269619	0.251568	0.0856423	0.178509	-0.118541	-0.0496863	-0.444067	0.330867	-0.0954849	-0.0612223	0.0967296	-0.247744	0.425323	0.289227	0.471941	0.367104	-0.239915	0.0409311	0.21966	0.119934	0.0134856	-0.0509315	0.0721944	0.212313	-0.13138	0.014775	-0.332885	-0.0427748	0.320044	-0.0288208	0.0749723	0.372108
1369509_a_at	A1bg	140656	alpha-1-B glycoprotein	-0.560496	-0.945463	-1.08094	0.177201	-0.110079	0.0564167	-0.0730527	-0.198426	0.752275	-0.124165	0.981608	0.616109	-0.236436	0.512616	1.05164	-0.990988	-0.601626	-0.715275	0.226156	0.0383452	0.00528086	-0.0523949	0.0893123	0.830425	0.0794238	0.248993	0.0325451	0.0737452	0.201025	0.0493554	-0.133572	0.022633	-0.135088	0.138049	0.294518	-0.135423	0.137275	0.144075	0.195841	-0.23054	-0.264385	-0.172719	-0.630427	-0.277217	0.20804	0.782729
1369510_at	Gapdhs	66020	glyceraldehyde-3-phosphate dehydrogenase, spermatogenic	-0.175519	-0.0788937	0.0581208	0.0387068	0.0756585	-0.105255	0.116892	0.0747344	0.0650665	0.00420466	-0.00334866	-0.137335	0.220719	-0.0793094	-0.188557	-0.0321145	0.00100192	-0.136959	-0.173784	-0.0017931	-0.196933	0.101122	0.0782066	0.0201507	0.0555898	-0.0289617	0.042135	0.217011	0.100054	0.0798587	0.0120472	0.0815789	-0.00362157	-0.210158	-0.0732384	-0.0899336	-0.187159	-0.0137916	-0.0494561	-0.0446134	0.149183	0.00131832	0.160016	0.205262	0.128283	0.00929625
1369526_at	Acadsb	25618	acyl-CoA dehydrogenase, short/branched chain	-0.193845	0.0793481	0.0580007	-0.250197	0.122605	0.0727362	0.232215	0.151699	0.12657	0.140534	0.190025	-0.014432	-0.407773	1.26301	-0.244335	-0.45002	-0.000415425	-0.221672	0.389719	-0.0209924	0.618813	0.204645	0.117674	0.0951131	0.0339903	-0.0783154	0.377058	-0.145391	-0.110894	-0.0866028	-0.336683	0.0250123	0.011146	-0.339258	0.0230499	-0.0459533	-0.579362	-0.251209	-0.39325	-0.545678	0.119116	-0.0800041	-0.571873	-0.14502	-0.198169	-0.326588
1369527_at	Cx3cr1	171056	chemokine (C-X3-C motif) receptor 1	-0.21211	-0.139857	0.0774457	-0.384511	0.122411	-0.168963	-0.153161	-0.0680677	-0.0318147	-0.191697	-0.0337734	-0.168603	0.191599	0.167532	0.220955	0.0920894	-0.0724235	-0.0537696	-0.12687	0.0900861	-0.143708	-0.0383441	0.0442085	0.0472142	0.0907804	0.0460589	0.0659661	0.219843	0.189886	0.0529138	0.0166552	0.0548401	-0.0183805	-0.0293611	-0.0905708	-0.0901556	-0.10607	0.0295668	0.0812476	0.130243	0.085434	0.209903	0.188753	-0.0259937	0.0665191	0.137924
1369533_a_at	Htr4	25324	5-hydroxytryptamine (serotonin) receptor 4, G protein-coupled	-0.146616	-0.107746	-0.0293359	0.0130663	0.0389622	-0.155573	-0.194966	-0.0121504	-0.0476908	0.126424	-0.0656491	0.0852446	0.272452	-0.309288	-0.0359967	-0.00203119	-0.139304	0.0560585	-0.0511513	-0.119662	-0.231599	0.0882648	0.177902	0.228864	-0.00111737	-0.12995	-0.121083	-0.0716458	0.00543937	-0.128535	-0.160888	0.105928	0.0651241	-0.178663	-0.126369	-0.144533	-0.196523	-0.0580834	-0.209243	-0.316255	-0.193895	-0.216644	0.142718	0.0830149	0.0207501	-0.0955531
1369539_at	St3gal3	64445	ST3 beta-galactoside alpha-2,3-sialyltransferase 3	-0.146308	-0.359505	-0.203001	0.498883	0.263703	0.34756	-0.0964305	-0.0873796	-0.153521	0.02489	0.11753	0.0448631	-0.0995226	0.166124	0.188743	-0.0465581	-0.0359354	0.0652692	0.0457781	0.247658	0.287745	0.146304	0.172154	0.238306	-0.323735	0.0462913	0.0444141	-0.251962	-0.105749	-0.101188	0.126354	0.154305	0.137324	0.0474942	0.0790709	-0.0355013	-0.0918146	-0.233561	-0.031143	-0.300711	-0.302989	-0.135915	0.00232164	-0.0677993	0.0964054	-0.0214951
1369543_s_at	Dnajc21	192210	DnaJ (Hsp40) homolog, subfamily C, member 21	0.301943	-0.13682	-0.169035	0.361155	0.0625477	0.0724438	-0.0241669	-0.0800203	-0.160388	0.414734	0.201963	0.116373	0.122217	0.137502	-0.201803	0.323027	0.41941	0.350938	0.454303	0.135097	0.314692	0.725083	0.263945	0.14034	-0.181469	-0.0292163	-0.19609	-0.0498025	-0.152659	-0.198328	0.0955004	-0.0646794	0.120799	-0.109074	-0.125586	0.0434174	-0.0402581	-0.00647032	-0.00979766	0.0557399	0.189558	0.181763	0.34884	-0.117076	0.199051	-0.160926
1369546_at	Bbox1	64564	butyrobetaine (gamma), 2-oxoglutarate dioxygenase (gamma-butyrobetaine hydroxylase) 1	-0.835006	-0.0665288	-0.14975	-0.687995	0.0128238	-0.114829	-0.399964	0.0558541	0.0798318	-0.415854	-0.0549666	0.0234951	-0.367039	0.483509	-0.0302566	-0.277604	-0.0587002	-0.10633	-0.00753673	-0.118792	0.0866716	-0.291695	0.0858525	-0.00459627	-0.242978	-0.108758	-0.0411573	-0.0426579	0.0634008	-0.0370623	-0.210309	-0.11132	-0.0299298	-0.141107	-0.0145444	0.105733	-0.420965	-0.0647882	-0.317002	-0.600079	-0.122255	-0.456883	-0.293992	0.149487	-0.105601	-0.284832
1369549_at	Klrk1	24934	killer cell lectin-like receptor subfamily K, member 1	-0.38029	0.0172987	-0.214793	-0.109869	-0.130492	-0.055831	0.326773	-0.0302669	-0.0609461	0.0855369	-0.162879	0.0452592	0.31928	-0.0392274	0.317468	-0.200197	-0.0819142	-0.116804	-0.0336625	0.126487	-0.389163	-0.496117	-0.110799	-0.000399251	-0.120933	-0.0977215	-0.182519	0.173968	0.0282735	-0.0250232	0.00728742	-0.097771	-0.0824845	0.202557	0.0524513	0.178237	-0.3108	-0.206142	-0.0225462	-0.184254	-0.0861852	-0.105297	0.346398	0.0827555	0.316249	-0.18388
1369553_at	Hsd17b3	117182	hydroxysteroid (17-beta) dehydrogenase 3	-0.0890282	-0.0641814	0.0330135	-0.135948	-0.223079	-0.180131	-0.110034	-0.0500571	-0.163394	-0.0425344	0.0998199	-0.0958059	0.192706	-0.219149	0.0305975	0.257347	0.0403229	0.104125	-0.0581482	0.101872	-0.16874	0.163002	0.0580525	-0.0386658	0.133442	0.213262	0.158524	-0.0309169	0.0573579	0.0296568	0.122364	0.156959	0.124501	-0.0227127	0.0792521	-0.0749219	-0.261205	0.114214	-0.0362676	-0.13109	0.0834112	-0.0616774	-0.10686	0.0385504	-0.102712	0.0269778
1369555_at	Ccr4	171054	chemokine (C-C motif) receptor 4	-0.0112326	-0.0733239	0.111087	0.0480384	0.0819848	0.172531	-0.112204	0.103754	0.168337	-0.0804878	0.108705	-0.0790644	-0.0959948	-0.230699	-0.299238	0.195033	0.0496636	0.0704154	-0.142149	-0.121558	-0.119493	0.0621706	0.0244196	0.00486112	-0.0723218	-0.0713006	-0.053739	0.191186	-0.132456	0.0530018	-0.108652	0.189211	-0.0361948	-0.0742525	0.0102745	-0.124505	-0.371562	-0.397767	-0.330982	-0.0382874	0.173524	0.106267	-0.0983254	0.181882	-0.124995	-0.10713
1369558_at	Inhbc	64549	inhibin beta C	-0.628109	-0.0383206	-0.0513281	-0.348661	-0.0120325	0.0637459	-0.229979	-0.303409	-0.293999	-0.133914	0.216392	0.218753	-0.915786	0.430912	0.16757	-0.960651	0.039671	-0.113576	-0.113473	-0.048211	0.104997	-0.714624	-0.164294	-0.0672069	-0.533531	-0.114383	-0.296955	-0.684571	-0.145388	-0.18853	-0.401058	-0.063589	-0.329188	-0.449358	-0.231868	-0.350823	-1.07249	-0.199978	-0.413206	-1.13439	-0.130182	-0.488681	-0.536868	-0.128154	-0.301044	-0.488528
1369559_a_at	Cd47	29364	Cd47 molecule	-0.00108247	0.0171416	-0.00376157	0.104807	-0.0624291	0.00861916	0.340268	0.0430499	0.00880919	0.138953	-0.105172	0.093272	-0.0512403	0.0295967	0.0566711	0.0955797	0.0220543	0.0718047	0.108254	-0.0205444	0.148793	-0.00219993	-0.0495065	-0.0385317	-0.0746995	-0.168736	-0.118929	-0.168813	-0.0245199	-0.119799	-0.0870074	-0.0790168	-0.0803516	-0.210934	-0.165405	-0.267631	0.451533	-0.0519417	0.345783	0.435568	0.0782584	0.383965	0.130975	-0.221738	0.358165	0.257241
1369560_at	Gpd1	60666	glycerol-3-phosphate dehydrogenase 1 (soluble)	0.315395	0.0353978	0.0257993	0.377586	-0.0882284	-0.151446	0.113177	-0.0369275	0.153032	0.304511	0.2108	0.223627	-0.00823145	0.396009	0.165791	-0.203943	0.0537097	-0.113707	0.145827	0.0989696	-0.0602951	-0.109611	0.00939465	-0.0676191	0.0688556	0.0433773	0.310172	-0.245015	-0.129186	-0.0741358	-0.0686949	-0.0249247	0.0303026	0.162274	0.329916	0.334234	0.0112397	-0.0295268	-0.23807	-0.397958	-0.0908925	-0.184634	-0.142355	0.291617	-0.00757672	-0.12802
1369566_at	Tas2r119	78979	taste receptor, type 2, member 119	-0.119291	0.154726	0.0822339	-0.0451608	0.0125449	-0.0942818	0.366755	0.32819	0.284191	-0.0165123	-0.138847	-0.0451242	0.289929	-0.1373	0.0682466	-0.062161	-0.127254	-0.0668248	-0.139156	0.0158827	-0.22691	-0.0500398	0.119356	0.109734	-0.0158136	0.0574814	0.128003	0.0788511	0.0844973	-0.0668027	0.0189222	0.052191	-0.00375838	-0.105779	-0.0351092	-0.13674	-0.170934	0.0403982	-0.175901	-0.181148	-0.0324693	-0.109445	-0.169713	0.0600439	-0.269514	0.136249
1369572_at	Mcpt1	29265	mast cell protease 1	-0.0920359	-0.0540505	-0.111663	0.0664466	0.124708	0.0974494	0.0986062	0.202815	0.197957	0.0581502	-0.0786588	0.0563126	0.0810741	-0.0684196	0.098455	-0.058901	-0.129948	-0.00287079	0.223184	0.165024	-0.00454442	-0.142893	0.100247	0.0299675	0.0740932	0.0188278	-0.0269004	0.0112452	-0.0383796	0.0612091	0.0798021	0.0475935	0.0577245	-0.118292	-0.0571619	-0.104245	0.0435484	0.169582	-0.0241623	0.124322	-0.0114777	-0.0207226	-0.0916366	0.141808	-0.0565844	0.116924
1369577_at	Socs2	84607	suppressor of cytokine signaling 2	-1.07637	0.330532	-0.207502	-0.816881	0.518725	0.0104868	0.339606	-0.206286	0.580135	-0.330177	0.584307	0.256646	-1.4667	-0.39237	-0.915532	-1.19991	0.730026	-0.00415699	0.0150539	0.0783476	0.0977289	-1.73944	-0.270145	0.0589423	-0.532438	-1.27378	0.383445	-0.358433	0.664077	-0.182559	-0.588767	1.1649	0.444279	0.224325	0.00414182	-0.21309	0.735276	0.813634	1.01469	-0.952633	0.178336	-0.275492	0.376652	1.00717	0.468899	0.379803
1369578_at	Tas2r121	78983	taste receptor, type 2, member 121	-0.0985553	-0.0898785	-0.0896445	0.0235814	0.0738246	-0.0644473	-0.0928924	0.005216	-0.0913702	0.104874	-0.00257748	0.0118712	0.113041	-0.0519664	0.0420328	0.12642	0.028868	0.158604	0.011019	0.210528	-0.158784	0.179047	0.0492471	0.126136	0.00611483	0.0176219	-0.0932349	0.285077	0.208294	0.117996	0.0229878	-0.119887	0.0387741	-0.222995	0.0821817	-0.0865111	0.141211	0.162641	0.0656832	-0.188113	-0.0819038	-0.199641	-0.231515	-0.123395	-0.179693	-0.000472626
1369581_at	Pemt	25511	phosphatidylethanolamine N-methyltransferase	0.325415	0.0185281	0.0955366	0.366734	-0.0201477	0.103812	-0.0123798	0.0844297	0.121592	-0.0146207	-0.0334897	-0.0907173	0.11448	-0.149867	0.152701	-0.130512	0.0116021	0.171203	-0.107928	0.0404181	0.0067259	-0.225842	-0.0671287	-0.118199	-0.139133	-0.0267098	-0.072397	-0.331052	-0.0447639	-0.10518	-0.128041	0.0124246	-0.0295521	-0.112242	0.000444803	-0.0464104	-0.153112	-0.0752562	-0.11086	-0.183501	-0.0957709	-0.235505	-0.0992164	-0.0839488	-0.0650121	0.0714382
1369588_a_at	Atpif1	25392	ATPase inhibitory factor 1	0.0270451	0.186834	0.160459	0.342348	-0.0153394	0.224096	0.0617714	0.0734747	0.145329	-0.219367	-0.187898	-0.133736	0.0145008	-0.0603927	-0.000740503	0.524484	0.254158	0.113147	-0.0281637	0.19206	0.0868687	-0.110489	-0.00883971	-0.134548	0.815456	0.20339	0.439828	0.59872	0.0782179	0.180914	0.714006	-0.0125824	0.341836	0.523529	0.130949	0.162677	0.832456	0.123437	0.784828	0.977613	0.162626	0.591647	0.194895	-0.0549535	0.393681	0.59481
1369590_a_at	Ddit3	29467	DNA-damage inducible transcript 3	0.0693223	-0.00180078	0.0413916	0.256201	0.00355327	0.00662499	0.0467533	-0.0621927	0.00585451	0.270511	0.165392	0.288502	-0.0600041	0.169031	0.216478	0.0718668	0.155198	0.041372	0.0276046	-0.0992889	-0.0995977	0.154368	-0.088687	-0.0238051	0.244282	-0.140284	-0.11675	-0.117069	-0.225252	0.066732	-0.00643141	-0.135704	3.69152e-05	-0.0632681	0.0953151	-0.22301	1.33608	0.0748537	1.2088	1.55827	0.0590537	1.11394	1.47759	-0.225219	0.592408	1.09799
1369592_at	Wbp2	192645	WW domain binding protein 2	-0.00947517	-0.0368157	-0.0197119	0.24148	0.0636255	-0.0547919	-0.131153	0.0333883	-0.0395979	0.146771	0.216144	0.099382	-0.0272645	-0.141946	-0.0170291	-0.153301	-0.138117	0.0556599	-0.121741	-0.0752858	-0.136895	-0.121438	-0.119914	-0.0173894	0.154698	0.084519	-0.061534	0.110478	-0.0347218	0.0123649	-0.438789	-0.180201	-0.224665	-0.00886554	0.013686	0.0934705	-0.0542153	0.00674265	-0.195063	0.0587183	0.0763105	0.105974	-0.0806908	-0.114423	-0.143315	0.00828818
1369597_at	Vapb	60431	VAMP (vesicle-associated membrane protein)-associated protein B and C	0.0651223	-0.0195608	0.0221695	0.0628526	-0.0927533	0.0210077	0.00505238	-0.025039	0.110448	-0.00310893	0.0215041	0.0989871	-0.144201	0.00180398	-0.0128898	0.0648801	-0.0154336	0.0509906	0.0832664	-0.0281757	0.222025	-0.113092	0.04068	-0.1265	0.00946799	0.000380898	0.0211355	0.0591146	-0.105135	0.0598523	-0.140281	-0.162739	-0.123623	0.123103	0.0919003	0.0279209	0.133632	-0.0312459	-0.105007	0.0928181	-0.00733872	0.161246	0.24476	0.0784261	0.299395	0.141202
[truncated: 6,503 more rows]
[truncated: 159 more columns]
